# Supplementary material for: Molecular features similarities between SARS-CoV-2, SARS, MERS and key human genes could favour the viral infections and trigger collateral effects
Source: bioRxiv preprint, doi:10.1101/2020.06.23.167072, version 1 (2020-06-25)
Supplement: Supplementary files [file 167072_file07.zip]

Archive with 6 entries (6 files):
- sup_files/Suplementary_file_1.xlsx
- sup_files/Supplementary_file_2.pdf
- sup_files/Supplementary_file_3.pdf
- sup_files/Supplementary_file_4.pdf
- sup_files/Supplementary_file_5.pdf
- sup_files/Supplementary_file_6.pdf
