# Supplementary material for: Molecular features similarities between SARS-CoV-2, SARS, MERS and key human genes could favour the viral infections and trigger collateral effects
Source: bioRxiv preprint, doi:10.1101/2020.06.23.167072, version 1 (2020-06-25)
Supplement: Supplementary files [file 167072_file07.zip › sup_files/Suplementary_file_1.xlsx]

## Sheet: Virus Accession
S1: Virus accession id used in these work
Accession Id	Related virus	Host	Country
DQ071615.1	NA	Bats	China
DQ412042.1	NA	Bats	China
DQ412043.1	NA	Bats	China
EF065505.1	NA	Bats	China
EF065506.1	NA	Bats	China
EF065507.1	NA	Bats	China
EF065508.1	NA	Bats	China
EF065509.1	NA	Bats	China
EF065510.1	NA	Bats	China
EF065511.1	NA	Bats	China
EF065512.1	NA	Bats	China
EF065513.1	NA	Bats	China
EF065514.1	NA	Bats	China
EF065515.1	NA	Bats	China	*
EF065516.1	NA	Bats	China
FJ588686.1	NA	Bats	China
HM211098.1	NA	Bats	China
HM211099.1	NA	Bats	China
HM211100.1	NA	Bats	China
HM211101.1	NA	Bats	China
JX993987.1	NA	Bats	China
JX993988.1	NA	Bats	China
KF294457.1	NA	Bats	China
KF569996.1	NA	Bats	China
KJ473811.1	NA	Bats	China
KJ473812.1	NA	Bats	China
KJ473813.1	NA	Bats	China
KJ473814.1	NA	Bats	China
KJ473815.1	NA	Bats	China
KJ473816.1	NA	Bats	China	*
KJ473820.1	NA	Bats	China
KJ473822.1	NA	Bats	China
KP886808.1	NA	Bats	China
KP886809.1	NA	Bats	China
KU762337.1	NA	Bats	China
KU762338.1	NA	Bats	China
KU973692.1	NA	Bats	China
KY352407.1	NA	Bats	China
KY417142.1	NA	Bats	China
KY417143.1	NA	Bats	China
KY417145.1	NA	Bats	China	*
KY417146.1	NA	Bats	China
KY417147.1	NA	Bats	China
KY417148.1	NA	Bats	China
KY417149.1	NA	Bats	China
MG762674.1	NA	Bats	China
MG772933.1	NA	Bats	China
MG772934.1	NA	Bats	China
MK211374.1	NA	Bats	China
MK211375.1	NA	Bats	China
MK211377.1	NA	Bats	China
MK211378.1	NA	Bats	China
MK211379.1	NA	Bats	China
MN611519.1	NA	Bats	China
MN611520.1	NA	Bats	China
NC_009019.1	NA	Bats	China	*
NC_009020.1	NA	Bats	China
NC_009021.1	NA	Bats	China
NC_030886.1	NA	Bats	China
KC545383.1	MERs	Hedgehogs	China
KC545386.1	MERs	Hedgehogs	Germany
KC869678.4	MERs	Bats	China
KJ473821.1	MERs	Bats	China
MF593268.1	MERs	Bats	South Africa
MG596802.1	MERs	Bats	Italy
MG596803.1	MERs	Bats	Italy
MK679660.1	MERs	Hedgehogs	China
MK907286.1	MERs	Hedgehogs	China
MK907287.1	MERs	Hedgehogs	China
NC_019843.3	MERs	Humans	Saudi Arabia
NC_038294.1	MERs	Humans	England
NC_039207.1	MERs	Hedgehogs	Germany
EF424616.1	NA	Bos taurus	China
EF424618.1	NA	Bos taurus	China
EF424619.1	NA	Bos taurus	China
EF424620.1	NA	Bos taurus	China
FJ938064.1	NA	Bos taurus	China
FJ938065.1	NA	Bos taurus	China
FJ938066.1	NA	Bos taurus	China
KU886219.1	NA	Bos taurus	China
KX432213.1	NA	Canids	China
KX982264.1	NA	Bos taurus	China
AY515512.1	SARs	Civets	China
AY572034.1	SARs	Civets	China
AY572035.1	SARs	Civets	China
AY572038.1	SARs	Civets	China
AY613948.1	SARs	Civets	China
AY613949.1	SARs	Civets	China
AY613950.1	SARs	Civets	China
AY686863.1	SARs	Civets	China
AY686864.1	SARs	Civets	China
FJ959407.1	SARs	Civets	China
KC881005.1	SARs	Bats	China
KC881006.1	SARs	Bats	China
KF367457.1	SARs	Bats	China
KT444582.1	SARs	Bats	China
KY417144.1	SARs	Bats	China
KY417150.1	SARs	Bats	China
KY417151.1	SARs	Bats	China
KY417152.1	SARs	Bats	China
MK211376.1	SARs	Bats	China
NC_004718.3	SARs	Humans	Canada
MN996532.1	SARS-CoV-2	Bats	China	*
MT040333.1	SARS-CoV-2	Pangolins	China
MT040334.1	SARS-CoV-2	Pangolins	China
MT040335.1	SARS-CoV-2	Pangolins	China
MT040336.1	SARS-CoV-2	Pangolins	China
MT072864.1	SARS-CoV-2	Pangolins	China
MT118835.1	SARS-CoV-2	Humans	USA
MT126808.1	SARS-CoV-2	Humans	Brazil	*
MT198652.2	SARS-CoV-2	Humans	Spain
MT233519.1	SARS-CoV-2	Humans	Spain	*
MT233523.1	SARS-CoV-2	Humans	Spain
MT233526.1	SARS-CoV-2	Humans	USA
MT259235.1	SARS-CoV-2	Humans	USA
MT263074.1	SARS-CoV-2	Humans	Peru	*
MT263435.1	SARS-CoV-2	Humans	USA
NC_045512.2	SARS-CoV-2	Humans	China
(*) Viruses whose CDSs were used for molecular and codon usage analyses

## Sheet: CUB virus parameters
S2: Table of viral genes of SARs, SARs-CoV-2 and MERS with molecular and Codon usage features calculated and used for codon usage and clustering analysis
"Gene"	"CPB_score"	"dn_Score"	"GCA_aaA"	"GCC_aaA"	"GCG_aaA"	"GCT_aaA"	"TGC_aaC"	"TGT_aaC"	"GAC_aaD"	"GAT_aaD"	"GAA_aaE"	"GAG_aaE"	"TTC_aaF"	"TTT_aaF"	"GGA_aaG"	"GGC_aaG"	"GGG_aaG"	"GGT_aaG"	"CAC_aaH"	"CAT_aaH"	"ATA_aaI"	"ATC_aaI"	"ATT_aaI"	"AAA_aaK"	"AAG_aaK"	"CTA_aaL"	"CTC_aaL"	"CTG_aaL"	"CTT_aaL"	"TTA_aaL"	"TTG_aaL"	"ATG_aaM"	"AAC_aaN"	"AAT_aaN"	"CCA_aaP"	"CCC_aaP"	"CCG_aaP"	"CCT_aaP"	"CAA_aaQ"	"CAG_aaQ"	"AGA_aaR"	"AGG_aaR"	"CGA_aaR"	"CGC_aaR"	"CGG_aaR"	"CGT_aaR"	"AGC_aaS"	"AGT_aaS"	"TCA_aaS"
"AGR87639|MERs"	0.02242	0.201318	0.267	0.128	0.072	0.533	0.308	0.692	0.323	0.677	0.558	0.442	0.236	0.764	0.135	0.207	0.054	0.603	0.252	0.748	0.278	0.154	0.568	0.459	0.541	0.076	0.085	0.076	0.287	0.23	0.245	1	0.301	0.699	0.259	0.132	0.015	0.594	0.541	0.459	0.266	0.127	0.061	0.127	0.053	0.365	0.082	0.233	0.205
"AGY29650|MERs"	0.02259	0.863161	0.214	0.143	0.051	0.592	0.279	0.721	0.381	0.619	0.51	0.49	0.221	0.779	0.14	0.28	0.075	0.505	0.19	0.81	0.36	0.147	0.493	0.627	0.373	0.096	0.088	0.053	0.377	0.184	0.202	1	0.323	0.677	0.224	0.155	0.103	0.517	0.515	0.485	0.186	0.14	0.047	0.186	0.047	0.395	0.07	0.211	0.167
"AGY29651|MERs"	0.06236	1.3473	0	0.5	0	0.5	0.5	0.5	0.429	0.571	0.5	0.5	0.167	0.833	0.25	0	0	0.75	0	1	0	0	1	1	0	0	0.2	0	0.4	0.1	0.3	1	0	1	0.4	0.2	0	0.4	0.667	0.333	0.571	0.143	0	0	0	0.286	0	0.2	0.4
"AIG13097|MERs"	0.01747	0.345492	0.248	0.133	0.082	0.536	0.297	0.703	0.292	0.708	0.58	0.42	0.256	0.744	0.133	0.212	0.063	0.592	0.195	0.805	0.246	0.143	0.611	0.447	0.553	0.075	0.075	0.077	0.291	0.221	0.261	1	0.325	0.675	0.244	0.14	0.018	0.598	0.553	0.447	0.277	0.121	0.057	0.135	0.057	0.355	0.079	0.24	0.198
"AIG13098|MERs"	-0.07382	1.50325	0.3	0.2	0.1	0.4	0.25	0.75	0	1	0.5	0.5	0.5	0.5	0.6	0.2	0	0.2	0.667	0.333	0.25	0.5	0.25	0.6	0.4	0.071	0.286	0.214	0.143	0.071	0.214	1	0.25	0.75	0.111	0.111	0.111	0.667	0	1	0.25	0.25	0.25	0	0.25	0	0.125	0	0.25
"AIG13099|MERs"	0.01457	1.43154	0.25	0.083	0.167	0.5	0.667	0.333	0.125	0.875	0.615	0.385	0	1	0.111	0.222	0	0.667	0.4	0.6	0.267	0.133	0.6	0.875	0.125	0.154	0.077	0	0.308	0.308	0.154	1	0.5	0.5	0.167	0.222	0.111	0.5	0.667	0.333	0.2	0.3	0.1	0.15	0	0.25	0.087	0.043	0.174
"AIG13100|MERs"	0.01735	1.48758	0.214	0.286	0.071	0.429	0.375	0.625	0.5	0.5	0.5	0.5	0.2	0.8	0.111	0.444	0	0.444	0.333	0.667	0.421	0.053	0.526	0.667	0.333	0.069	0.172	0.172	0.172	0.31	0.103	1	0.375	0.625	0.333	0	0.083	0.583	0.5	0.5	0.143	0.071	0	0.357	0	0.429	0.095	0.238	0.143
"AIG13101|MERs"	-0.07404	1.41564	0.25	0	0	0.75	0.25	0.75	0	0	0.333	0.667	0.571	0.429	0.333	0	0.333	0.333	0	0	0.4	0.2	0.4	1	0	0.125	0.125	0.125	0.125	0.375	0.125	1	0.667	0.333	0	0.667	0	0.333	0.667	0.333	0.5	0	0	0	0	0.5	0	0.333	0.667
"AIG13102|MERs"	0.02245	1.57314	0.412	0.176	0.059	0.353	0.5	0.5	0.5	0.5	0.4	0.6	0.111	0.889	0.25	0.25	0	0.5	0	1	0.1	0.2	0.7	0.857	0.143	0.143	0.19	0.048	0.333	0.095	0.19	1	0.5	0.5	0.6	0.1	0.1	0.2	0.143	0.857	0.556	0	0.111	0.111	0.111	0.111	0.045	0.318	0.227
"AIG13103|MERs"	-0.00477	1.26624	0.275	0.2	0.025	0.5	0	0	0.471	0.529	0.5	0.5	0.5	0.5	0.316	0.184	0.105	0.395	0.4	0.6	0.111	0.111	0.778	0.567	0.433	0.04	0.2	0.08	0.48	0.04	0.16	1	0.531	0.469	0.25	0.194	0.056	0.5	0.391	0.609	0.423	0	0.038	0.115	0.154	0.269	0.056	0.194	0.278
"AIG13104|MERs"	-0.0222	1.65592	0.5	0	0.5	0	1	0	0.571	0.429	0.267	0.733	0.333	0.667	0.4	0.2	0.1	0.3	0.625	0.375	0.375	0.125	0.5	0.286	0.714	0.2	0.15	0.325	0.125	0.125	0.075	1	0.75	0.25	0.353	0.235	0.176	0.235	0.667	0.333	0	0.625	0.125	0.25	0	0	0.176	0.059	0.118
"YP_009513008|MERs"	0.04045	0.237865	0.339	0.088	0.098	0.475	0.236	0.764	0.178	0.822	0.635	0.365	0.192	0.808	0.178	0.182	0.054	0.586	0.175	0.825	0.439	0.102	0.459	0.569	0.431	0.097	0.049	0.048	0.193	0.338	0.275	1	0.18	0.82	0.412	0.097	0.058	0.432	0.609	0.391	0.372	0.168	0.062	0.084	0.027	0.288	0.079	0.275	0.224
"YP_009513009|MERs"	0.04344	0.372394	0.344	0.079	0.107	0.47	0.238	0.762	0.162	0.838	0.629	0.371	0.193	0.807	0.166	0.196	0.068	0.57	0.133	0.867	0.422	0.096	0.481	0.581	0.419	0.097	0.038	0.059	0.201	0.321	0.283	1	0.173	0.827	0.416	0.097	0.071	0.416	0.63	0.37	0.425	0.173	0.047	0.071	0.024	0.26	0.082	0.287	0.208
"YP_009513010|MERs"	0.02625	0.87926	0.303	0.079	0.056	0.562	0.318	0.682	0.203	0.797	0.49	0.51	0.137	0.863	0.23	0.241	0.057	0.471	0.263	0.737	0.385	0.141	0.474	0.742	0.258	0.103	0.103	0.075	0.187	0.374	0.159	1	0.221	0.779	0.353	0.098	0.078	0.471	0.651	0.349	0.128	0.179	0.051	0.256	0.051	0.333	0.071	0.31	0.175
"YP_009513011|MERs"	0.04998	1.22237	0.333	0.333	0	0.333	0.667	0.333	0.167	0.833	0.429	0.571	0.4	0.6	0.25	0.25	0	0.5	0	1	0.2	0	0.8	1	0	0	0	0	0.25	0.5	0.25	1	0.4	0.6	0.5	0	0	0.5	0.75	0.25	0	0.5	0	0.5	0	0	0.222	0.333	0
"YP_009513012|MERs"	-0.03804	1.4008	0.444	0	0.111	0.444	0	1	0	1	0	1	0.167	0.833	1	0	0	0	0.5	0.5	0.5	0.5	0	0.571	0.429	0.364	0.045	0.091	0.182	0.136	0.182	1	0.4	0.6	0.5	0	0	0.5	0.417	0.583	0	0	0	0	0	0	0.125	0.375	0.125
"YP_009513013|MERs"	0.00968	1.24533	0.333	0	0	0.667	0	1	0	1	0	1	0	1	1	0	0	0	0	0	0	1	0	0.75	0.25	0.3	0.1	0.1	0.2	0.1	0.2	1	0.375	0.625	0.25	0	0	0.75	0.556	0.444	0	0	0	0	0	0	0	0.4	0.2
"YP_009513014|MERs"	0.02952	1.50546	0.625	0.125	0	0.25	0.4	0.6	0.25	0.75	0.417	0.583	0	1	0.25	0.5	0	0.25	0.167	0.833	0.125	0.25	0.625	0.5	0.5	0.037	0.037	0.111	0.259	0.296	0.259	1	0.364	0.636	0.133	0.2	0.067	0.6	0.667	0.333	0.235	0.235	0.059	0.118	0.059	0.294	0.312	0.125	0.188
"YP_009513015|MERs"	-0.03195	1.33429	0.6	0	0	0.4	0.455	0.545	0.4	0.6	0.4	0.6	0.353	0.647	0.667	0	0	0.333	0.5	0.5	0.333	0.238	0.429	0.857	0.143	0.259	0	0.074	0.296	0.296	0.074	1	0.111	0.889	0.455	0	0.091	0.455	0.8	0.2	0	0.222	0	0.111	0.111	0.556	0.167	0.292	0.292
"YP_009513016|MERs"	-0.01191	1.32496	0.333	0.333	0	0.333	0.5	0.5	0	1	1	0	0.333	0.667	0.333	0	0.333	0.333	0	1	0.6	0.4	0	0.5	0.5	0	0	0.1	0.2	0.6	0.1	1	0.5	0.5	0.6	0	0.2	0.2	0.6	0.4	0	0	1	0	0	0	0	0.25	0.25
"YP_009513017|MERs"	0.03924	1.34044	0.353	0.118	0	0.529	0.333	0.667	0.5	0.5	1	0	0.1	0.9	0	0.25	0.083	0.667	0	1	0.538	0	0.462	0.286	0.714	0.261	0.043	0.087	0.348	0.174	0.087	1	0.3	0.7	0.5	0.2	0	0.3	0.167	0.833	0.455	0.182	0.091	0.091	0	0.182	0	0.235	0
"YP_009513018|MERs"	0.01359	1.27206	0.368	0.237	0.079	0.316	1	0	0.5	0.5	0.765	0.235	0.545	0.455	0.294	0.206	0.029	0.471	0.5	0.5	0.1	0.2	0.7	0.457	0.543	0.12	0.04	0.2	0.24	0.24	0.16	1	0.25	0.75	0.293	0.146	0.049	0.512	0.536	0.464	0.52	0.08	0.08	0.24	0	0.08	0.135	0.135	0.324
"YP_009513019|MERs"	0.01127	1.45669	0.667	0.083	0.167	0.083	1	0	0.875	0.125	0.667	0.333	0.333	0.667	0.125	0.125	0.25	0.5	0.5	0.5	0.231	0.308	0.462	0.3	0.7	0.303	0.091	0.242	0.061	0.121	0.182	1	0.75	0.25	0.5	0.357	0	0.143	0.154	0.846	0	0.2	0	0.4	0.2	0.2	0.333	0.133	0.2
"YP_007188577|MERs"	0.00384	0.204743	0.251	0.151	0.075	0.523	0.405	0.595	0.36	0.64	0.538	0.462	0.358	0.642	0.144	0.238	0.069	0.55	0.32	0.68	0.238	0.196	0.565	0.48	0.52	0.065	0.121	0.071	0.276	0.216	0.251	1	0.28	0.72	0.308	0.154	0.04	0.498	0.566	0.434	0.226	0.157	0.073	0.169	0.06	0.315	0.071	0.244	0.204
"YP_007188578|MERs"	-0.00281	0.358726	0.256	0.147	0.088	0.509	0.448	0.552	0.389	0.611	0.539	0.461	0.379	0.621	0.146	0.232	0.079	0.543	0.337	0.663	0.227	0.197	0.576	0.49	0.51	0.061	0.103	0.07	0.282	0.207	0.277	1	0.325	0.675	0.302	0.178	0.053	0.467	0.607	0.393	0.226	0.144	0.075	0.192	0.082	0.281	0.061	0.251	0.205
"YP_007188579|MERs"	0.02163	0.818728	0.205	0.182	0.045	0.568	0.357	0.643	0.258	0.742	0.478	0.522	0.292	0.708	0.13	0.38	0.043	0.446	0.476	0.524	0.315	0.11	0.575	0.608	0.392	0.109	0.101	0.076	0.361	0.16	0.193	1	0.286	0.714	0.226	0.129	0.048	0.597	0.507	0.493	0.114	0.091	0.091	0.205	0.045	0.455	0.067	0.172	0.157
"YP_007188580|MERs"	0.03298	1.26731	0.333	0.167	0	0.5	0.333	0.667	0.4	0.6	0.5	0.5	0.25	0.75	0	0	0	1	0	1	0	0	1	1	0	0	0.3	0	0.4	0.1	0.2	1	0	1	0.333	0.167	0	0.5	0.75	0.25	0.4	0.2	0.2	0	0	0.2	0	0.083	0.583
"YP_007188581|MERs"	-0.04584	1.53646	0.111	0.111	0.111	0.667	0	1	0.25	0.75	0.4	0.6	0.667	0.333	0.6	0.2	0	0.2	0.667	0.333	0	0.75	0.25	0.5	0.5	0.143	0.143	0.143	0.143	0.143	0.286	1	0.4	0.6	0	0.167	0.167	0.667	0.333	0.667	0	0	0.5	0	0.5	0	0.083	0.083	0.333
"YP_007188582|MERs"	-0.00567	1.63151	0.3	0.2	0.2	0.3	0.5	0.5	0.2	0.8	0.375	0.625	0.091	0.909	0.25	0.5	0	0.25	0.2	0.8	0.154	0.308	0.538	0.545	0.455	0.138	0.138	0.172	0.241	0.138	0.172	1	0.3	0.7	0.25	0.25	0	0.5	0.75	0.25	0.333	0.167	0	0.333	0.056	0.111	0	0.136	0.227
"YP_007188583|MERs"	-0.01371	1.53897	0.182	0.273	0.091	0.455	0.375	0.625	0.429	0.571	0	1	0.471	0.529	0.2	0.4	0	0.4	0.571	0.429	0.273	0.182	0.545	0.667	0.333	0.179	0.143	0.179	0.143	0.321	0.036	1	0.429	0.571	0.333	0.167	0.083	0.417	0.333	0.667	0.214	0	0	0.214	0	0.571	0.231	0.115	0.038
"YP_007188584|MERs"	-0.09078	1.5092	0.25	0	0	0.75	0	1	0.5	0.5	0.5	0.5	0.625	0.375	0.333	0.333	0.333	0	0	0	0.75	0	0.25	1	0	0.091	0.091	0.091	0.091	0.364	0.273	1	0.333	0.667	0.167	0.5	0	0.333	0.5	0.5	0.333	0	0.333	0	0	0.333	0	0.5	0.5
"YP_007188585|MERs"	-0.03311	1.69795	0.211	0.211	0.158	0.421	0.5	0.5	0.667	0.333	0.4	0.6	0.2	0.8	0.273	0.364	0	0.364	0.333	0.667	0.111	0.222	0.667	0.714	0.286	0.19	0.238	0.143	0.19	0.143	0.095	1	0.2	0.8	0.5	0.1	0.1	0.3	0.333	0.667	0.333	0.111	0.111	0	0.222	0.222	0.1	0.2	0.2
"YP_007188586|MERs"	0.00826	1.38137	0.212	0.242	0.061	0.485	0	0	0.25	0.75	0.462	0.538	0.5	0.5	0.342	0.184	0.184	0.289	0.429	0.571	0.083	0.25	0.667	0.517	0.483	0.077	0.115	0.115	0.615	0	0.077	1	0.469	0.531	0.412	0.147	0	0.441	0.696	0.304	0.308	0.038	0.077	0.231	0.154	0.192	0.059	0.176	0.235
"QIA48640|COV2"	0.0496	0.225114	0.338	0.126	0.023	0.513	0.223	0.777	0.388	0.612	0.728	0.272	0.315	0.685	0.206	0.118	0.034	0.643	0.304	0.696	0.326	0.147	0.527	0.623	0.377	0.12	0.092	0.05	0.299	0.257	0.182	1	0.341	0.659	0.406	0.065	0.04	0.489	0.717	0.283	0.461	0.107	0.037	0.095	0.012	0.288	0.066	0.237	0.265
"QIA48641|COV2"	0.06003	0.818207	0.316	0.132	0	0.553	0.35	0.65	0.419	0.581	0.604	0.396	0.237	0.763	0.333	0.179	0.024	0.464	0.25	0.75	0.266	0.19	0.544	0.672	0.328	0.144	0.108	0.036	0.342	0.234	0.135	1	0.407	0.593	0.357	0.107	0.054	0.482	0.79	0.21	0.561	0.195	0	0.073	0	0.171	0.042	0.198	0.323
"QIA48642|COV2"	0.03719	1.40854	0.188	0.188	0	0.625	0.778	0.222	0.4	0.6	0.889	0.111	0.286	0.714	0.267	0.267	0	0.467	0.25	0.75	0.238	0.095	0.667	0.6	0.4	0.069	0.138	0.103	0.448	0.103	0.138	1	0.125	0.875	0.462	0	0.154	0.385	0.778	0.222	0.571	0.286	0	0.143	0	0	0.13	0.174	0.304
"QIA48643|COV2"	-0.07357	1.63867	0	0.25	0.5	0.25	0.667	0.333	0	1	0.5	0.5	0.6	0.4	0	0	0	1	0	0	0.333	0.333	0.333	1	0	0.143	0	0.143	0.429	0.143	0.143	1	0.2	0.8	0	0	0	1	0	0	0.333	0	0.333	0	0	0.333	0.125	0.125	0.25
"QIA48644|COV2"	-0.00659	1.53683	0.105	0.105	0.105	0.684	0.25	0.75	1	0	0.857	0.143	0.545	0.455	0.357	0.143	0	0.5	0.2	0.8	0.15	0.3	0.55	0.571	0.429	0.2	0.114	0.114	0.314	0.114	0.143	1	0.5	0.5	1	0	0	0	0.25	0.75	0.214	0.214	0.071	0.214	0.071	0.214	0.143	0.214	0.286
"QIA48645|COV2"	-0.05465	1.02081	1	0	0	0	0	0	0.5	0.5	0.4	0.6	0.333	0.667	0	0	0	0	0	1	0.25	0.083	0.667	0.5	0.5	0	0.286	0	0.286	0.429	0	1	0.25	0.75	0.5	0	0	0.5	0.333	0.667	1	0	0	0	0	0	0	0	0
"QIA48646|COV2"	0.012	1.3281	0.3	0	0.1	0.6	0.833	0.167	0.5	0.5	0.625	0.375	0.2	0.8	0.25	0.25	0	0.5	0.333	0.667	0.429	0.143	0.429	0.571	0.429	0.067	0.2	0	0.467	0.2	0.067	1	0	1	0.5	0	0	0.5	0.833	0.167	0.667	0	0	0	0	0.333	0.125	0	0.625
"QIA48647|COV2"	0.03384	1.30928	0.5	0	0	0.5	0.143	0.857	0.375	0.625	1	0	0.625	0.375	0.2	0.2	0	0.6	0.25	0.75	0.3	0.2	0.5	1	0	0.1	0.2	0	0.2	0.4	0.1	1	0.667	0.333	0.286	0	0.143	0.571	0.5	0.5	0.25	0.25	0	0	0	0.5	0	0.2	0.4
"QIA48648|COV2"	0.02563	1.34882	0.343	0.114	0.029	0.514	0	0	0.458	0.542	0.615	0.385	0.692	0.308	0.366	0.244	0.073	0.317	0.5	0.5	0.143	0.286	0.571	0.727	0.273	0.074	0.074	0.148	0.37	0.111	0.222	1	0.364	0.636	0.31	0.207	0.138	0.345	0.733	0.267	0.267	0.1	0.2	0.233	0.033	0.167	0.179	0.256	0.179
"YP_009724389|COV2"	0.05112	0.219224	0.269	0.146	0.033	0.552	0.186	0.814	0.355	0.645	0.729	0.271	0.272	0.728	0.184	0.153	0.024	0.638	0.297	0.703	0.341	0.166	0.493	0.647	0.353	0.115	0.091	0.042	0.277	0.301	0.174	1	0.302	0.698	0.405	0.062	0.036	0.496	0.682	0.318	0.459	0.127	0.041	0.102	0.029	0.242	0.05	0.261	0.281
"YP_009724390|COV2"	0.08894	0.796528	0.342	0.101	0.025	0.532	0.3	0.7	0.306	0.694	0.708	0.292	0.234	0.766	0.207	0.183	0.037	0.573	0.235	0.765	0.237	0.184	0.579	0.623	0.377	0.083	0.111	0.028	0.333	0.259	0.185	1	0.386	0.614	0.431	0.069	0	0.5	0.742	0.258	0.476	0.238	0	0.024	0.048	0.214	0.051	0.172	0.263
"YP_009724391|COV2"	0.04172	1.42306	0.231	0.231	0	0.538	0.571	0.429	0.462	0.538	0.909	0.091	0.429	0.571	0.286	0.214	0	0.5	0.5	0.5	0.333	0.238	0.429	0.636	0.364	0.033	0.167	0.067	0.333	0.1	0.3	1	0.5	0.5	0.25	0	0.167	0.583	0.556	0.444	0.5	0.167	0	0.167	0	0.167	0.091	0.227	0.364
"YP_009724392|COV2"	-0.08728	1.47086	0	0.25	0.5	0.25	0.667	0.333	0	1	0.5	0.5	0.6	0.4	0	0	0	1	0	0	0.333	0.333	0.333	1	0	0.143	0	0.143	0.5	0.071	0.143	1	0.2	0.8	0	0	0	1	0	0	0.333	0	0.333	0	0	0.333	0.125	0.125	0.125
"YP_009724393|COV2"	0.00507	1.59633	0.211	0.105	0.053	0.632	0	1	0.833	0.167	0.857	0.143	0.545	0.455	0.429	0.214	0	0.357	0.2	0.8	0.15	0.3	0.55	0.571	0.429	0.143	0.171	0.114	0.343	0.114	0.114	1	0.636	0.364	0.6	0	0.2	0.2	0.5	0.5	0.214	0.214	0.071	0.143	0	0.357	0.133	0.267	0.2
"YP_009724394|COV2"	0.02316	1.01395	1	0	0	0	0	0	0.25	0.75	0.2	0.8	0	1	0	0	0	0	0	1	0.4	0.1	0.5	0.75	0.25	0.25	0.25	0	0.125	0.375	0	1	0.25	0.75	1	0	0	0	0.667	0.333	0	1	0	0	0	0	0	0	0.25
"YP_009724395|COV2"	-0.01684	1.4489	0.333	0.111	0.111	0.444	0.5	0.5	0.5	0.5	0.5	0.5	0.3	0.7	0.25	0.5	0	0.25	0.667	0.333	0.375	0.125	0.5	0.857	0.143	0.067	0.133	0.2	0.4	0.133	0.067	1	0.5	0.5	0.333	0	0	0.667	0.8	0.2	0.8	0	0	0	0	0.2	0.143	0	0.429
"YP_009724396|COV2"	0.00892	1.26034	0.4	0	0	0.6	0.286	0.714	0.429	0.571	0.667	0.333	0.5	0.5	0.4	0	0	0.6	0.5	0.5	0	0.5	0.5	1	0	0	0	0	0.2	0.6	0.2	1	0	1	0.143	0.143	0.143	0.571	0.5	0.5	0.5	0	0	0	0	0.5	0	0.222	0.333
"YP_009724397|COV2"	0.03628	1.34918	0.216	0.189	0.081	0.514	0	0	0.417	0.583	0.667	0.333	0.769	0.231	0.302	0.372	0.093	0.233	0.25	0.75	0.071	0.286	0.643	0.677	0.323	0.111	0.074	0.111	0.296	0.074	0.333	1	0.273	0.727	0.393	0.25	0.071	0.286	0.771	0.229	0.345	0.034	0.172	0.172	0.069	0.207	0.162	0.243	0.243
"YP_009725255|COV2"	-0.15912	0.825515	0.5	0	0	0.5	1	0	0	1	0	0	0.25	0.75	0	1	0	0	0	0	1	0	0	0	0	0.25	0.5	0	0	0	0.25	1	0.6	0.4	0	0	1	0	1	0	0.5	0	0	0	0	0.5	0	0.5	0
"YP_009725295|COV2"	0.04882	0.335908	0.269	0.152	0.042	0.537	0.181	0.819	0.37	0.63	0.736	0.264	0.25	0.75	0.167	0.159	0.023	0.652	0.293	0.707	0.316	0.177	0.507	0.63	0.37	0.103	0.09	0.041	0.297	0.269	0.2	1	0.309	0.691	0.384	0.067	0.024	0.524	0.642	0.358	0.42	0.153	0.053	0.092	0.023	0.26	0.041	0.259	0.279
"YP_009725318|COV2"	-0.00915	0.951212	0	1	0	0	0.5	0.5	0.5	0.5	1	0	0.5	0.5	0	0	0	0	0.5	0.5	0	0.2	0.8	0	0	0.091	0	0.182	0.364	0.273	0.091	1	0	1	0	0	0	0	1	0	0	0	0	0	0	0	0	0	1
"QHR63299|COV2"	0.05066	0.224718	0.276	0.152	0.029	0.543	0.204	0.796	0.341	0.659	0.712	0.288	0.286	0.714	0.188	0.145	0.027	0.64	0.264	0.736	0.328	0.161	0.511	0.661	0.339	0.121	0.088	0.037	0.283	0.293	0.178	1	0.284	0.716	0.402	0.047	0.04	0.511	0.661	0.339	0.447	0.134	0.045	0.102	0.028	0.244	0.058	0.242	0.271
"QHR63300|COV2"	0.07651	0.767397	0.3	0.163	0.025	0.512	0.35	0.65	0.328	0.672	0.617	0.383	0.307	0.693	0.268	0.159	0.024	0.549	0.222	0.778	0.241	0.127	0.633	0.698	0.302	0.128	0.11	0.028	0.349	0.239	0.147	1	0.329	0.671	0.466	0.052	0	0.483	0.717	0.283	0.436	0.282	0	0.026	0	0.256	0.093	0.144	0.268
"QHR63301|COV2"	0.02839	1.4345	0.286	0.143	0	0.571	0.429	0.571	0.385	0.615	0.818	0.182	0.571	0.429	0.286	0.143	0	0.571	0.375	0.625	0.318	0.136	0.545	0.636	0.364	0.033	0.2	0.133	0.3	0.1	0.233	1	0.5	0.5	0.333	0	0.167	0.5	0.667	0.333	0.5	0.167	0	0.167	0	0.167	0.13	0.174	0.348
"QHR63302|COV2"	-0.08553	1.52472	0	0.25	0.5	0.25	0.667	0.333	0	1	0.5	0.5	0.6	0.4	0	0	0	1	0	0	0.333	0.333	0.333	1	0	0.143	0	0.143	0.5	0.071	0.143	1	0.2	0.8	0	0	0	1	0	0	0.333	0	0.333	0	0	0.333	0.125	0.125	0.125
"QHR63303|COV2"	0.0429	1.58868	0.263	0.158	0	0.579	0.25	0.75	0.667	0.333	0.714	0.286	0.455	0.545	0.643	0.143	0	0.214	0.2	0.8	0.15	0.35	0.5	0.571	0.429	0.171	0.114	0.114	0.343	0.086	0.171	1	0.545	0.455	0.6	0.2	0.2	0	0.25	0.75	0.143	0.286	0.071	0.143	0	0.357	0.143	0.286	0.286
"QHR63304|COV2"	0.01463	1.1154	1	0	0	0	0	0	0.25	0.75	0.2	0.8	0.333	0.667	0	0	0	0	0	1	0.4	0.1	0.5	0.75	0.25	0.25	0.125	0	0.25	0.375	0	1	0.5	0.5	1	0	0	0	0.667	0.333	0	1	0	0	0	0	0	0	0.25
"QHR63305|COV2"	0.02266	1.45691	0.375	0.125	0	0.5	0.5	0.5	0.5	0.5	0.625	0.375	0.4	0.6	0.25	0.5	0	0.25	0.667	0.333	0.25	0.25	0.5	1	0	0.133	0.067	0.2	0.467	0.067	0.067	1	0	1	0.333	0.167	0	0.5	0.8	0.2	0.8	0	0	0	0	0.2	0.143	0	0.571
"QHR63306|COV2"	-0.01234	1.03046	0	1	0	0	0.5	0.5	0.5	0.5	1	0	0.5	0.5	0	0	0	0	0.5	0.5	0	0.25	0.75	0	0	0.091	0	0.182	0.364	0.273	0.091	1	0	1	0	0	0	0	1	0	0	0	0	0	0	0	0	0.333	0.667
"QHR63307|COV2"	0.01402	1.34506	0.5	0	0	0.5	0.286	0.714	0.429	0.571	0.5	0.5	0.571	0.429	0.4	0.2	0	0.4	0.75	0.25	0	0.444	0.556	1	0	0	0.091	0	0.273	0.455	0.182	1	0	1	0.143	0.143	0.143	0.571	0.5	0.5	0.5	0	0	0	0	0.5	0	0.2	0.4
"QHR63308|COV2"	0.02658	1.37399	0.278	0.139	0.028	0.556	0	0	0.375	0.625	0.667	0.333	0.692	0.308	0.341	0.341	0.073	0.244	0.5	0.5	0.071	0.214	0.714	0.742	0.258	0.111	0.074	0.111	0.296	0.074	0.333	1	0.364	0.636	0.379	0.207	0.103	0.31	0.806	0.194	0.276	0.103	0.172	0.207	0.069	0.172	0.184	0.263	0.211
"NP_828849|SARs"	0.02657	0.178206	0.29	0.139	0.049	0.523	0.343	0.657	0.356	0.644	0.536	0.464	0.387	0.613	0.212	0.227	0.033	0.527	0.338	0.662	0.216	0.242	0.542	0.513	0.487	0.099	0.134	0.101	0.297	0.185	0.184	1	0.369	0.631	0.449	0.091	0.029	0.431	0.551	0.449	0.371	0.139	0.042	0.127	0.012	0.309	0.079	0.214	0.293
"NP_828850|SARs"	0.02726	0.321924	0.292	0.138	0.043	0.526	0.347	0.653	0.38	0.62	0.517	0.483	0.395	0.605	0.182	0.201	0.045	0.572	0.36	0.64	0.17	0.25	0.58	0.496	0.504	0.09	0.142	0.108	0.304	0.167	0.189	1	0.393	0.607	0.416	0.09	0.03	0.464	0.531	0.469	0.342	0.13	0.055	0.103	0.007	0.363	0.081	0.211	0.255
"NP_828851|SARs"	0.05823	0.861498	0.212	0.141	0.059	0.588	0.462	0.538	0.315	0.685	0.5	0.5	0.289	0.711	0.253	0.316	0.051	0.38	0.133	0.867	0.179	0.115	0.705	0.567	0.433	0.101	0.192	0.04	0.343	0.192	0.131	1	0.346	0.654	0.333	0.053	0.035	0.579	0.8	0.2	0.308	0.308	0.103	0.077	0.026	0.179	0.063	0.116	0.295
"NP_828852|SARs"	0.00163	1.42745	0.35	0.2	0.1	0.35	0.5	0.5	0.571	0.429	0.5	0.5	0.375	0.625	0.154	0.385	0	0.462	0.429	0.571	0.227	0.182	0.591	0.667	0.333	0.148	0.148	0.074	0.37	0.074	0.185	1	0.5	0.5	0.538	0	0.231	0.231	0.545	0.455	0.833	0.167	0	0	0	0	0.133	0.133	0.4
"NP_828853|SARs"	-0.0855	1.38639	0.2	0	0.2	0.6	0.5	0.5	0	0	0	1	0	1	0	1	0	0	0.625	0.375	0.5	0.25	0.25	0.4	0.6	0.24	0	0.12	0.08	0.24	0.32	1	1	0	0.5	0	0.5	0	0.5	0.5	0	0.143	0.571	0	0.143	0.143	0.2	0.133	0.267
"NP_828854|SARs"	-0.0367	1.60013	0	0.25	0.5	0.25	0.667	0.333	0	1	1	0	0.75	0.25	0.5	0	0	0.5	0	0	0.333	0.333	0.333	1	0	0.143	0	0.143	0.429	0.143	0.143	1	0.4	0.6	0.5	0	0	0.5	0	0	0	0	0.5	0	0	0.5	0.143	0.143	0.143
"NP_828855|SARs"	0.00478	1.64406	0.158	0.211	0.105	0.526	0	1	0.833	0.167	0.571	0.429	0.545	0.455	0.2	0.2	0.2	0.4	1	0	0.167	0.111	0.722	0.667	0.333	0.194	0.194	0.097	0.258	0.097	0.161	1	0.615	0.385	0.6	0	0.2	0.2	0.6	0.4	0.133	0.133	0.133	0.2	0.133	0.267	0.167	0.083	0.333
"NP_828856|SARs"	-0.00299	1.19628	0.5	0	0	0.5	0	0	0.4	0.6	0.4	0.6	0.5	0.5	0	0	0	0	0	1	0.5	0.1	0.4	0	1	0.143	0	0	0.286	0.429	0.143	1	0	1	0.333	0	0	0.667	0.5	0.5	0.333	0.667	0	0	0	0	0	0.333	0.333
"NP_828857|SARs"	0.04326	1.43441	0.25	0	0	0.75	0.667	0.333	1	0	0.25	0.75	0.3	0.7	0.25	0.25	0	0.5	0.75	0.25	0.143	0.143	0.714	0.667	0.333	0.312	0.188	0.125	0.25	0.062	0.062	1	0	1	0.667	0	0	0.333	0.6	0.4	0.667	0	0.167	0	0	0.167	0.143	0	0.571
"NP_828858|SARs"	0.02451	1.32804	0.265	0.235	0.088	0.412	0	0	0.545	0.455	0.5	0.5	0.692	0.308	0.356	0.356	0.067	0.222	0.4	0.6	0.091	0.273	0.636	0.69	0.31	0.192	0.115	0.154	0.269	0.038	0.231	1	0.36	0.64	0.323	0.29	0.065	0.323	0.706	0.294	0.323	0.065	0.194	0.258	0	0.161	0.143	0.2	0.257
"NP_828859|SARs"	-0.07547	1.5516	0.5	0.25	0.125	0.125	0	0	0.833	0.167	0.2	0.8	1	0	0	0.333	0.333	0.333	0	1	0.8	0	0.2	0.667	0.333	0.091	0.273	0.182	0.091	0.182	0.182	1	0.75	0.25	0.375	0.625	0	0	0.625	0.375	0.2	0.6	0	0	0	0.2	0.333	0	0.5
"NP_849175|SARs"	-0.00842	1.39125	0	1	0	0	0.5	0.5	0.5	0.5	0.75	0.25	0.333	0.667	0	0	0	0	0	0	0.4	0.2	0.4	1	0	0.182	0.182	0.091	0.182	0.273	0.091	1	0	1	0	0	0	1	0	1	0	0	0	0	0	0	0	0	1
"NP_849176|SARs"	0.054	0.89401	1	0	0	0	0.5	0.5	0	1	1	0	0	0	0	0	0	0	0.5	0.5	0.333	0	0.667	0.667	0.333	0.2	0.2	0	0.4	0	0.2	1	0	1	0	0	0	1	0.5	0.5	0	0	0	1	0	0	0	0.333	0
"NP_849177|SARs"	0.00244	1.15811	0.143	0	0.143	0.714	0.4	0.6	0.5	0.5	1	0	0	1	0.2	0	0	0.8	0.5	0.5	0.333	0.667	0	0.333	0.667	0.111	0	0	0.556	0.222	0.111	1	0.333	0.667	0.333	0	0	0.667	1	0	0.333	0.5	0.167	0	0	0	1	0	0
"ATO98203|SARs"	0.02428	0.176551	0.295	0.134	0.05	0.52	0.372	0.628	0.372	0.628	0.55	0.45	0.367	0.633	0.214	0.212	0.038	0.536	0.317	0.683	0.208	0.238	0.554	0.514	0.486	0.109	0.131	0.096	0.291	0.182	0.191	1	0.366	0.634	0.454	0.106	0.026	0.414	0.553	0.447	0.378	0.134	0.031	0.122	0.027	0.309	0.083	0.212	0.286
"ATO98204|SARs"	0.02526	0.322524	0.29	0.137	0.052	0.521	0.359	0.641	0.391	0.609	0.561	0.439	0.372	0.628	0.188	0.203	0.041	0.568	0.364	0.636	0.166	0.259	0.576	0.498	0.502	0.096	0.139	0.101	0.3	0.159	0.204	1	0.408	0.592	0.434	0.12	0.012	0.434	0.517	0.483	0.347	0.129	0.048	0.109	0.014	0.354	0.084	0.205	0.253
"ATO98205|SARs"	0.03923	0.871725	0.241	0.108	0.048	0.602	0.385	0.615	0.342	0.658	0.5	0.5	0.286	0.714	0.247	0.312	0.052	0.39	0.267	0.733	0.169	0.208	0.623	0.559	0.441	0.124	0.227	0.082	0.299	0.155	0.113	1	0.272	0.728	0.305	0.034	0.034	0.627	0.839	0.161	0.317	0.341	0.098	0.073	0	0.171	0.06	0.13	0.27
"ATO98206|SARs"	0.00351	1.46059	0.421	0.211	0.053	0.316	0.5	0.5	0.615	0.385	0.429	0.571	0.4	0.6	0.267	0.333	0	0.4	0.429	0.571	0.217	0.217	0.565	0.667	0.333	0.148	0.148	0.074	0.37	0.074	0.185	1	0.462	0.538	0.462	0	0.308	0.231	0.545	0.455	1	0	0	0	0	0	0.125	0.125	0.375
"ATO98207|SARs"	-0.0492	1.34851	0.25	0	0	0.75	1	0	0	0	0	1	0	1	0	1	0	0	0.8	0.2	0.5	0	0.5	0.444	0.556	0.15	0	0.15	0.05	0.25	0.4	1	1	0	0.5	0	0.5	0	0.444	0.556	0.333	0	0.333	0	0	0.333	0.167	0.083	0.333
"ATO98208|SARs"	-0.03434	1.6065	0	0.25	0.5	0.25	0.667	0.333	0	1	1	0	0.75	0.25	0.5	0	0	0.5	0	0	0.333	0.333	0.333	1	0	0.143	0	0.143	0.429	0.143	0.143	1	0.4	0.6	0.5	0	0	0.5	0	0	0	0	0.5	0	0	0.5	0.143	0.143	0.143
"ATO98209|SARs"	0.02731	1.70199	0.111	0.167	0.111	0.611	0.333	0.667	0.8	0.2	0.5	0.5	0.545	0.455	0.2	0.267	0.267	0.267	1	0	0.158	0.158	0.684	0.667	0.333	0.226	0.129	0.097	0.29	0.097	0.161	1	0.615	0.385	0.6	0	0.2	0.2	0.5	0.5	0.188	0.125	0.125	0.25	0.062	0.25	0.154	0.077	0.308
"ATO98210|SARs"	0.03211	1.11362	0.5	0	0	0.5	0	0	0.4	0.6	0.4	0.6	0.5	0.5	0	0	0	0	0	1	0.545	0.091	0.364	0.333	0.667	0.167	0	0	0.333	0.333	0.167	1	0	1	0	0	0	1	0.5	0.5	0.333	0.667	0	0	0	0	0	0.333	0.667
"ATO98211|SARs"	-0.01973	1.50278	0.444	0.222	0	0.333	0.4	0.6	0.25	0.75	0	1	0.182	0.818	0.091	0.364	0.091	0.455	0	1	0.4	0	0.6	0.5	0.5	0.1	0	0.05	0.35	0.4	0.1	1	0.364	0.636	0.444	0	0	0.556	0.455	0.545	0.2	0.2	0	0.4	0.2	0	0.2	0.2	0.267
"ATO98212|SARs"	0.04534	1.41479	0.4	0	0	0.6	0.667	0.333	0.5	0.5	0.375	0.625	0.333	0.667	0.25	0.25	0	0.5	0.4	0.6	0.25	0.125	0.625	0.667	0.333	0.294	0.176	0.118	0.353	0	0.059	1	0.5	0.5	0.4	0	0.2	0.4	0.25	0.75	0.833	0	0	0	0	0.167	0.143	0	0.571
"ATO98213|SARs"	0.03026	1.27643	0	1	0	0	0.5	0.5	0.5	0.5	0.75	0.25	0.333	0.667	0	0	0	0	0	0	0.6	0	0.4	1	0	0.182	0.182	0.091	0.273	0.182	0.091	1	0.5	0.5	0	0	0	1	0	1	0	0	0	0	0	0	0	0	1
"ATO98214|SARs"	0.10051	1.12452	0	0	0	1	0.222	0.778	0.667	0.333	0.889	0.111	0.4	0.6	0.667	0.167	0	0.167	0.4	0.6	0.444	0.111	0.444	0.75	0.25	0.2	0.3	0	0.3	0.2	0	1	0.25	0.75	0.778	0	0	0.222	1	0	0.2	0	0	0.4	0	0.4	0	0.286	0.429
"ATO98215|SARs"	0.00414	1.33871	0.265	0.206	0.088	0.441	0	0	0.5	0.5	0.5	0.5	0.692	0.308	0.333	0.356	0.089	0.222	0.4	0.6	0.083	0.333	0.583	0.69	0.31	0.192	0.115	0.154	0.269	0.077	0.192	1	0.32	0.68	0.344	0.25	0.094	0.312	0.676	0.324	0.323	0.065	0.194	0.258	0	0.161	0.147	0.206	0.206
"AAV49729|SARs"	0.02586	0.178476	0.295	0.138	0.052	0.515	0.349	0.651	0.357	0.643	0.534	0.466	0.381	0.619	0.212	0.224	0.033	0.53	0.335	0.665	0.218	0.238	0.544	0.514	0.486	0.1	0.134	0.101	0.294	0.184	0.187	1	0.374	0.626	0.449	0.091	0.029	0.431	0.558	0.442	0.373	0.135	0.042	0.127	0.015	0.308	0.081	0.212	0.293
"AAV49730|SARs"	0.05823	0.866581	0.21	0.148	0.062	0.58	0.487	0.513	0.329	0.671	0.523	0.477	0.293	0.707	0.253	0.304	0.051	0.392	0.133	0.867	0.182	0.13	0.688	0.552	0.448	0.102	0.194	0.041	0.337	0.194	0.133	1	0.35	0.65	0.328	0.052	0.034	0.586	0.815	0.185	0.326	0.302	0.093	0.07	0.047	0.163	0.061	0.121	0.293
"AAV49731|SARs"	0.0039	1.44275	0.35	0.2	0.1	0.35	0.5	0.5	0.615	0.385	0.556	0.444	0.4	0.6	0.2	0.333	0	0.467	0.429	0.571	0.217	0.174	0.609	0.667	0.333	0.148	0.148	0.074	0.37	0.074	0.185	1	0.5	0.5	0.583	0	0.25	0.167	0.545	0.455	0.667	0.167	0	0	0	0.167	0.188	0.125	0.375
"AAV49732|SARs"	-0.08443	1.38294	0.2	0	0.2	0.6	0.5	0.5	0	0	0	1	0	1	0	1	0	0	0.625	0.375	0.5	0.25	0.25	0.375	0.625	0.24	0	0.12	0.08	0.24	0.32	1	1	0	0.5	0	0.5	0	0.5	0.5	0	0.143	0.571	0	0.143	0.143	0.2	0.133	0.267
"AAV49733|SARs"	-0.0367	1.60013	0	0.25	0.5	0.25	0.667	0.333	0	1	1	0	0.75	0.25	0.5	0	0	0.5	0	0	0.333	0.333	0.333	1	0	0.143	0	0.143	0.429	0.143	0.143	1	0.4	0.6	0.5	0	0	0.5	0	0	0	0	0.5	0	0	0.5	0.143	0.143	0.143
"AAV49734|SARs"	0.00814	1.66528	0.158	0.211	0.105	0.526	0.333	0.667	0.833	0.167	0.571	0.429	0.545	0.455	0.214	0.214	0.214	0.357	1	0	0.167	0.111	0.722	0.5	0.5	0.194	0.194	0.097	0.258	0.097	0.161	1	0.615	0.385	0.6	0	0.2	0.2	0.6	0.4	0.133	0.133	0.133	0.2	0.133	0.267	0.154	0.154	0.308
"AAV49735|SARs"	-0.00299	1.19628	0.5	0	0	0.5	0	0	0.4	0.6	0.4	0.6	0.5	0.5	0	0	0	0	0	1	0.5	0.1	0.4	0	1	0.143	0	0	0.286	0.429	0.143	1	0	1	0.333	0	0	0.667	0.5	0.5	0.333	0.667	0	0	0	0	0	0.333	0.333
"AAV49736|SARs"	0.04183	1.43888	0.25	0	0	0.75	0.667	0.333	0.5	0.5	0.25	0.75	0.3	0.7	0.25	0.25	0	0.5	0.75	0.25	0.143	0.143	0.714	0.667	0.333	0.312	0.188	0.125	0.25	0.062	0.062	1	0	1	0.667	0	0	0.333	0.6	0.4	0.667	0	0.167	0	0	0.167	0.143	0	0.571
"AAV49737|SARs"	-0.00842	1.39125	0	1	0	0	0.5	0.5	0.5	0.5	0.75	0.25	0.333	0.667	0	0	0	0	0	0	0.4	0.2	0.4	1	0	0.182	0.182	0.091	0.182	0.273	0.091	1	0	1	0	0	0	1	0	1	0	0	0	0	0	0	0	0	1
"AAV49738|SARs"	0.01003	1.19972	0.25	0	0.125	0.625	0.333	0.667	0.333	0.667	1	0	0	1	0.167	0	0	0.833	0.4	0.6	0.5	0.167	0.333	0.8	0.2	0.167	0.083	0	0.5	0.167	0.083	1	0.143	0.857	0.143	0	0	0.857	0.8	0.2	0.25	0.375	0.125	0.25	0	0	0.25	0.25	0
"AAV49739|SARs"	0.02424	1.33777	0.273	0.212	0.121	0.394	0	0	0.545	0.455	0.5	0.5	0.692	0.308	0.348	0.348	0.065	0.239	0.5	0.5	0.091	0.273	0.636	0.69	0.31	0.192	0.115	0.154	0.269	0.038	0.231	1	0.4	0.6	0.323	0.29	0.065	0.323	0.686	0.314	0.323	0.065	0.194	0.258	0	0.161	0.143	0.2	0.257
"AAV49740|SARs"	-0.07652	1.53664	0.5	0.25	0.125	0.125	0	0	0.833	0.167	0.2	0.8	1	0	0	0.333	0.333	0.333	0	1	0.75	0	0.25	0.667	0.333	0.091	0.273	0.182	0.091	0.182	0.182	1	0.75	0.25	0.375	0.625	0	0	0.625	0.375	0.2	0.6	0	0	0	0.2	0.333	0	0.5
"AAV49741|SARs"	-0.04772	1.08167	0.444	0	0.333	0.222	1	0	0	0	0.714	0.286	1	0	0	0	1	0	0.333	0.667	0	0	1	0.25	0.75	0.1	0.5	0.3	0.1	0	0	1	1	0	0	0.25	0.25	0.5	0.8	0.2	0	0.333	0.333	0.333	0	0	0	0	0
[truncated: 47 more columns]

## Sheet: human_genes
S3: Table of highly expressed human genes in lung tissues according to the fold-change between the expression level in lung and the tissue with second highest expression level in “Human Protein Atlas” (https://www.proteinatlas.org/humanproteome/tissue/lung). Molecular and Codon usage features calculated and used for codon usage and clustering analysis
Gene Accession	Gene name	Proteins	CPB_score	dn_Score	GCA_aaA	GCC_aaA	GCG_aaA	GCT_aaA	TGC_aaC	TGT_aaC	GAC_aaD	GAT_aaD	GAA_aaE	GAG_aaE	TTC_aaF	TTT_aaF	GGA_aaG	GGC_aaG	GGG_aaG	GGT_aaG	CAC_aaH	CAT_aaH	ATA_aaI	ATC_aaI	ATT_aaI	AAA_aaK	AAG_aaK	CTA_aaL	CTC_aaL	CTG_aaL	CTT_aaL	TTA_aaL	TTG_aaL	ATG_aaM	AAC_aaN	AAT_aaN	CCA_aaP	CCC_aaP	CCG_aaP	CCT_aaP	CAA_aaQ	CAG_aaQ	AGA_aaR	AGG_aaR	CGA_aaR	CGC_aaR	CGG_aaR	CGT_aaR	AGC_aaS
lcl|NM_000014.6_cds_NP_000005.3_1	A2M	alpha-2-macroglobulin isoform a precursor	0.0834602	0.784965	0.247	0.376	0.054	0.323	0.4	0.6	0.509	0.491	0.49	0.51	0.581	0.419	0.352	0.275	0.231	0.143	0.475	0.525	0.158	0.526	0.316	0.382	0.618	0.105	0.259	0.322	0.147	0.056	0.112	1	0.469	0.531	0.346	0.282	0.013	0.359	0.301	0.699	0.152	0.261	0.174	0.152	0.109	0.152	0.187
lcl|NM_000020.3_cds_NP_000011.2_1	ACVRL1	serine/threonine-protein kinase receptor R3 precursor	0.12456	1.19111	0.172	0.552	0.103	0.172	0.778	0.222	0.792	0.208	0.103	0.897	0.667	0.333	0.103	0.615	0.205	0.077	0.789	0.211	0	0.8	0.2	0.316	0.684	0.066	0.164	0.623	0.016	0	0.131	1	0.812	0.188	0.179	0.429	0.179	0.214	0.13	0.87	0.114	0.229	0.057	0.2	0.371	0.029	0.294
lcl|NG_008386.2_cds_NP_000095.2_1	CYP1B1	cytochrome P450 1B1	0.121937	1.19219	0.042	0.5	0.333	0.125	0.75	0.25	0.741	0.259	0.391	0.609	0.765	0.235	0.031	0.719	0.125	0.125	0.8	0.2	0.059	0.647	0.294	0.267	0.733	0.049	0.279	0.492	0.082	0.016	0.082	1	0.75	0.25	0.118	0.324	0.353	0.206	0.185	0.815	0.045	0.182	0.045	0.432	0.227	0.068	0.421
lcl|NM_000201.3_cds_NP_000192.2_1	ICAM1	intercellular adhesion molecule 1 precursor	0.127836	1.20934	0.278	0.472	0.083	0.167	0.5	0.5	0.6	0.4	0.235	0.765	0.7	0.3	0.111	0.361	0.5	0.028	0.8	0.2	0.333	0.5	0.167	0.304	0.696	0.065	0.226	0.532	0.081	0	0.097	1	0.727	0.273	0.32	0.46	0.1	0.12	0.258	0.742	0.1	0.167	0.067	0.167	0.433	0.067	0.333
lcl|NM_000216.4_cds_NP_000207.2_1	ANOS1	anosmin-1 precursor	0.129755	1.2665	0.156	0.4	0.156	0.289	0.56	0.44	0.5	0.5	0.486	0.514	0.56	0.44	0.278	0.25	0.333	0.139	0.5	0.5	0.227	0.5	0.273	0.312	0.688	0.057	0.189	0.509	0.17	0.019	0.057	1	0.522	0.478	0.286	0.367	0.122	0.224	0.432	0.568	0.324	0.054	0.243	0.108	0.216	0.054	0.254
lcl|NM_000397.4_cds_NP_000388.2_1	CYBB	cytochrome b-245 heavy chain	0.13184	1.24256	0.342	0.316	0.105	0.237	0.562	0.438	0.312	0.688	0.531	0.469	0.487	0.513	0.353	0.265	0.324	0.059	0.412	0.588	0.179	0.436	0.385	0.412	0.588	0.053	0.263	0.439	0.088	0.035	0.123	1	0.4	0.6	0.182	0.182	0	0.636	0.556	0.444	0.192	0.269	0.231	0.038	0.231	0.038	0.121
lcl|NM_000433.4_cds_NP_000424.2_1	NCF2	neutrophil cytosol factor 2 isoform 1	0.127798	1.20004	0.216	0.378	0.081	0.324	0.667	0.333	0.6	0.4	0.5	0.5	0.5	0.5	0.077	0.346	0.538	0.038	0.857	0.143	0.105	0.526	0.368	0.34	0.66	0.061	0.184	0.449	0.122	0.061	0.122	1	0.667	0.333	0.297	0.351	0.054	0.297	0.25	0.75	0.316	0.053	0.211	0	0.368	0.053	0.345
lcl|NM_000444.6_cds_NP_000435.3_1	PHEX	phosphate-regulating neutral endopeptidase PHEX isoform 1	0.123655	1.19832	0.231	0.365	0.058	0.346	0.6	0.4	0.441	0.559	0.661	0.339	0.45	0.55	0.333	0.333	0.154	0.179	0.167	0.833	0.2	0.35	0.45	0.491	0.509	0.121	0.182	0.288	0.167	0.091	0.152	1	0.432	0.568	0.364	0.212	0.061	0.364	0.333	0.667	0.362	0.255	0.128	0.106	0.106	0.043	0.196
lcl|NM_000499.5_cds_NP_000490.1_1	CYP1A1	cytochrome P450 1A1 isoform 1	0.129469	1.20155	0.087	0.609	0	0.304	0.333	0.667	0.783	0.217	0.154	0.846	0.645	0.355	0.129	0.484	0.29	0.097	0.733	0.267	0.029	0.676	0.294	0.167	0.833	0.113	0.132	0.585	0.075	0.019	0.075	1	0.545	0.455	0.333	0.4	0.033	0.233	0.182	0.818	0.133	0.167	0.067	0.2	0.4	0.033	0.293
lcl|NM_000542.5_cds_NP_000533.4_1	SFTPB	pulmonary surfactant-associated protein B isoform 1 precursor	0.12574	1.19121	0.111	0.556	0.111	0.222	0.72	0.28	0.8	0.2	0.158	0.842	0.857	0.143	0.136	0.5	0.318	0.045	0.8	0.2	0.077	0.692	0.231	0.182	0.818	0.069	0.276	0.552	0.052	0	0.052	1	1	0	0.212	0.424	0.061	0.303	0.219	0.781	0.062	0.375	0.062	0.25	0.25	0	0.3
lcl|NM_000578.4_cds_NP_000569.3_1	SLC11A1	natural resistance-associated macrophage protein 1	0.122313	1.14665	0.111	0.574	0.148	0.167	0.8	0.2	0.812	0.188	0.222	0.778	0.758	0.242	0.149	0.553	0.191	0.106	0.909	0.091	0.088	0.706	0.206	0.308	0.692	0.048	0.321	0.464	0.095	0	0.071	1	0.812	0.188	0.172	0.483	0.172	0.172	0.118	0.882	0.091	0.136	0.182	0.182	0.273	0.136	0.444
lcl|NM_000584.4_cds_NP_000575.1_1	CXCL8	interleukin-8 isoform 1 precursor	0.142323	1.35716	0.3	0.3	0	0.4	0.4	0.6	0.5	0.5	0.556	0.444	0.5	0.5	0.667	0	0	0.333	1	0	0.167	0.167	0.667	0.4	0.6	0	0.167	0.417	0.167	0	0.25	1	0.667	0.333	0.4	0.4	0	0.2	0	1	0.5	0.5	0	0	0	0	0
lcl|NM_000619.3_cds_NP_000610.2_1	IFNG	interferon gamma precursor	0.157745	1.48233	0.556	0	0.111	0.333	0.667	0.333	0.6	0.4	0.667	0.333	0.364	0.636	0.143	0.286	0.143	0.429	0	1	0.222	0.556	0.222	0.619	0.381	0	0.143	0.214	0.286	0.071	0.286	1	0.3	0.7	1	0	0	0	0.4	0.6	0.25	0.125	0.5	0.125	0	0	0.231
lcl|NM_000686.5_cds_NP_000677.2_1	AGTR2	type-2 angiotensin II receptor	0.138922	1.35041	0.333	0.292	0	0.375	0.571	0.429	0.444	0.556	0.429	0.571	0.321	0.679	0.353	0.118	0.235	0.294	0.5	0.5	0.226	0.258	0.516	0.529	0.471	0.024	0.143	0.286	0.286	0.143	0.119	1	0.556	0.444	0.25	0.25	0.062	0.438	0.8	0.2	0.467	0.2	0.067	0.067	0.133	0.067	0.276
lcl|NM_000758.4_cds_NP_000749.2_1	CSF2	granulocyte-macrophage colony-stimulating factor precursor	0.143248	1.24095	0.222	0.556	0	0.222	0.8	0.2	1	0	0.385	0.615	0.2	0.8	0	1	0	0	0.667	0.333	0	0.833	0.167	0.167	0.833	0.053	0.263	0.526	0.053	0	0.105	1	0.5	0.5	0.182	0.545	0.182	0.091	0	1	0.167	0	0	0.333	0.333	0.167	0.5
lcl|NM_000759.4_cds_NP_000750.1_1	CSF3	granulocyte colony-stimulating factor isoform a precursor	0.127213	1.17865	0.167	0.667	0.042	0.125	0.8	0.2	0.75	0.25	0.364	0.636	0.833	0.167	0.267	0.4	0.2	0.133	0.667	0.333	0	1	0	0	1	0.026	0.179	0.641	0.051	0.026	0.077	1	0	0	0	0.733	0.067	0.2	0.1	0.9	0	0.2	0	0.6	0.2	0	0.529
lcl|NM_000774.5_cds_NP_000765.2_1	CYP2F1	cytochrome P450 2F1 precursor	0.128718	1.25019	0.115	0.5	0.269	0.115	0.714	0.286	0.759	0.241	0.042	0.958	0.667	0.333	0.241	0.448	0.207	0.103	0.857	0.143	0.077	0.769	0.154	0.105	0.895	0.055	0.26	0.562	0.055	0.014	0.055	1	0.643	0.357	0.125	0.469	0.25	0.156	0.263	0.737	0.182	0.061	0.061	0.455	0.182	0.061	0.447
lcl|NM_000779.4_cds_NP_000770.2_1	CYP4B1	cytochrome P450 4B1 isoform b	0.121983	1.09379	0.172	0.517	0.034	0.276	0.875	0.125	0.676	0.324	0.182	0.818	0.583	0.417	0.152	0.394	0.333	0.121	0.5	0.5	0	0.8	0.2	0.259	0.741	0.031	0.281	0.5	0.078	0.016	0.094	1	0.625	0.375	0.172	0.414	0.034	0.379	0	1	0.091	0.182	0	0.333	0.303	0.091	0.303
lcl|NM_000887.5_cds_NP_000878.2_1	ITGAX	integrin alpha-X isoform 2 precursor	0.0957326	0.922268	0.217	0.446	0.072	0.265	0.571	0.429	0.694	0.306	0.25	0.75	0.729	0.271	0.178	0.344	0.367	0.111	0.826	0.174	0.106	0.596	0.298	0.325	0.675	0.016	0.252	0.561	0.049	0.024	0.098	1	0.739	0.261	0.158	0.596	0.088	0.158	0.203	0.797	0.186	0.288	0.068	0.153	0.153	0.153	0.389
lcl|NM_000960.4_cds_NP_000951.1_1	PTGIR	prostacyclin receptor	0.102352	0.966116	0.038	0.673	0.192	0.096	1	0	0.818	0.182	0.125	0.875	0.952	0.048	0.152	0.545	0.242	0.061	1	0	0	1	0	0.2	0.8	0	0.304	0.607	0.054	0	0.036	1	1	0	0.115	0.462	0.192	0.231	0.067	0.933	0	0.167	0.125	0.583	0.125	0	0.424
lcl|NM_001002026.3_cds_NP_001002026.1_1	CLDN18	claudin-18 isoform 2	0.139634	1.29224	0.111	0.593	0.074	0.222	0.625	0.375	0.833	0.167	0.286	0.714	0.667	0.333	0.125	0.438	0.25	0.188	0.667	0.333	0.062	0.438	0.5	0.444	0.556	0.05	0.1	0.7	0.05	0	0.1	1	1	0	0.4	0.2	0	0.4	0.25	0.75	0	0.125	0.25	0.375	0.25	0	0.211
lcl|NM_001003693.3_cds_NP_001003693.1_1	LY6G6F	lymphocyte antigen 6 complex locus protein G6f precursor	0.147128	1.36704	0.296	0.481	0	0.222	0.556	0.444	0.6	0.4	0.385	0.615	0.857	0.143	0.269	0.308	0.346	0.077	0.714	0.286	0	0.8	0.2	0.714	0.286	0.081	0.297	0.351	0.054	0.054	0.162	1	0.857	0.143	0.32	0.32	0	0.36	0.154	0.846	0.227	0.455	0.045	0.091	0.045	0.136	0.25
lcl|NM_001004470.3_cds_NP_001004470.1_1	ST8SIA6	alpha-2,8-sialyltransferase 8F isoform 1 precursor	0.145577	1.44209	0.429	0.357	0.143	0.071	0.3	0.7	0.5	0.5	0.571	0.429	0.429	0.571	0.333	0.286	0.238	0.143	0.375	0.625	0.278	0.333	0.389	0.735	0.265	0.087	0.196	0.522	0.13	0.022	0.043	1	0.476	0.524	0.333	0.286	0.19	0.19	0.5	0.5	0.2	0.333	0	0.267	0.2	0	0.321
lcl|NM_001005505.3_cds_NP_001005505.1_1	CACNA2D2	voltage-dependent calcium channel subunit alpha-2/delta-2 isoform a precursor	0.0936641	0.876726	0.155	0.536	0.107	0.202	0.727	0.273	0.667	0.333	0.129	0.871	0.755	0.245	0.13	0.623	0.159	0.087	0.9	0.1	0.05	0.725	0.225	0.137	0.863	0.075	0.2	0.6	0.058	0.017	0.05	1	0.783	0.217	0.114	0.414	0.257	0.214	0.102	0.898	0.123	0.215	0.062	0.277	0.246	0.077	0.383
lcl|NM_001007033.2_cds_NP_001007034.1_1	CLEC6A	C-type lectin domain family 6 member A isoform 1	0.145539	1.32659	0.444	0.111	0	0.444	0.4	0.6	0.333	0.667	0.353	0.647	0.545	0.455	0.231	0.231	0.231	0.308	0.333	0.667	0.2	0.1	0.7	0.4	0.6	0.214	0.286	0.286	0.071	0	0.143	1	0.167	0.833	0.429	0.143	0	0.429	0.545	0.455	0.667	0.333	0	0	0	0	0.04
lcl|NM_001010978.4_cds_NP_001010978.2_1	LDLRAD1	low-density lipoprotein receptor class A domain-containing protein 1 isoform 1	0.148041	1.38797	0.125	0.625	0.062	0.188	0.591	0.409	0.571	0.429	0.375	0.625	1	0	0.3	0.45	0.25	0	0.667	0.333	0.333	0.333	0.333	0.5	0.5	0	0.444	0.278	0.111	0	0.167	1	0.8	0.2	0.312	0.375	0.125	0.188	0.333	0.667	0	0.333	0.111	0.444	0	0.111	0.25
lcl|NM_001012512.3_cds_NP_001012530.1_1	GRP	gastrin-releasing peptide isoform 2 precursor	0.152419	1.38755	0.222	0.111	0.556	0.111	1	0	0	1	0.4	0.6	1	0	0.125	0.312	0.375	0.188	1	0	0.5	0.5	0	0.444	0.556	0	0.176	0.706	0	0.059	0.059	1	0.75	0.25	0.1	0.3	0.3	0.3	0.3	0.7	0.25	0.25	0.083	0.167	0.083	0.167	0.333
lcl|NM_001012513.3_cds_NP_001012531.1_1	GRP	gastrin-releasing peptide isoform 3 preproprotein	0.152571	1.39836	0.222	0.111	0.556	0.111	1	0	0.25	0.75	0.4	0.6	1	0	0.154	0.308	0.462	0.077	1	0	0.5	0.5	0	0.25	0.75	0	0.25	0.6	0	0.05	0.1	1	0.714	0.286	0.1	0.3	0.3	0.3	0.143	0.857	0.3	0.2	0.1	0.2	0.1	0.1	0.417
lcl|NM_001017361.3_cds_NP_001017361.1_1	KHDC3L	KHDC3-like protein	0.160329	1.57419	0.111	0.556	0.056	0.278	0	0	0.714	0.286	0.263	0.737	0.571	0.429	0.133	0.267	0.4	0.2	1	0	0.125	0.75	0.125	0.182	0.818	0	0.4	0.267	0.067	0.067	0.2	1	0.6	0.4	0.25	0.167	0.333	0.25	0.1	0.9	0.053	0.105	0.105	0.211	0.421	0.105	0.071
lcl|NM_001018016.3_cds_NP_001018016.1_1	MUC1	mucin-1 isoform 2 precursor	0.161743	1.55937	0.273	0.409	0.091	0.227	0.333	0.667	0.556	0.444	0.455	0.545	0.545	0.455	0.105	0.263	0.263	0.368	0.4	0.6	0	0.444	0.556	0.375	0.625	0	0.208	0.583	0.042	0	0.167	1	0.4	0.6	0.333	0.333	0.056	0.278	0.25	0.75	0.2	0.1	0.3	0.2	0.1	0.1	0.3
lcl|NM_001018017.3_cds_NP_001018017.1_1	MUC1	mucin-1 isoform 3 precursor	0.161356	1.55193	0.263	0.421	0.105	0.211	0.333	0.667	0.556	0.444	0.455	0.545	0.545	0.455	0.105	0.263	0.263	0.368	0.4	0.6	0	0.444	0.556	0.286	0.714	0	0.208	0.583	0.042	0	0.167	1	0.4	0.6	0.375	0.312	0.062	0.25	0.25	0.75	0.2	0.1	0.3	0.2	0.1	0.1	0.3
lcl|NM_001024603.2_cds_NP_001019774.1_1	C7orf77	uncharacterized protein C7orf77	0.147802	1.29357	0.429	0.143	0	0.429	0.25	0.75	0.5	0.5	0.625	0.375	1	0	0.5	0.167	0	0.333	1	0	0	0.75	0.25	0.429	0.571	0	0.2	0.4	0.1	0	0.3	1	0.4	0.6	0	0	0.333	0.667	0.25	0.75	0.333	0.333	0	0.333	0	0	0.2
lcl|NM_001025290.3_cds_NP_001020461.1_1	DPPA5	developmental pluripotency-associated 5 protein	0.143679	1.37178	0.125	0.625	0	0.25	0	0	0.75	0.25	0.3	0.7	1	0	0.333	0.5	0.167	0	0.5	0.5	0	0.75	0.25	0.444	0.556	0.067	0.467	0.333	0.067	0	0.067	1	0	1	0.125	0.125	0.5	0.25	0	1	0.125	0	0.25	0.25	0.25	0.125	0.167
lcl|NM_001029871.4_cds_NP_001025042.2_1	RSPO4	R-spondin-4 isoform 1 precursor	0.120609	1.15387	0.091	0.545	0.091	0.273	0.652	0.348	1	0	0.143	0.857	0.833	0.167	0.074	0.667	0.222	0.037	0.8	0.2	0	1	0	0.2	0.8	0	0.25	0.6	0.05	0	0.1	1	0.833	0.167	0.188	0.562	0.188	0.062	0.071	0.929	0	0.407	0.074	0.259	0.259	0	0.5
lcl|NM_001031737.3_cds_NP_001026907.2_1	CCDC78	coiled-coil domain-containing protein 78 isoform 1	0.127152	1.19658	0.36	0.4	0.1	0.14	0.8	0.2	0.647	0.353	0.176	0.824	0.714	0.286	0.226	0.323	0.355	0.097	0.7	0.3	0.111	0.667	0.222	0.25	0.75	0.104	0.146	0.667	0.021	0	0.062	1	0.556	0.444	0.36	0.4	0	0.24	0.135	0.865	0.081	0.216	0.135	0.108	0.378	0.081	0.562
lcl|NM_001039111.3_cds_NP_001034200.1_1	TRIM71	E3 ubiquitin-protein ligase TRIM71	0.104215	1.00881	0.134	0.366	0.378	0.122	0.846	0.154	0.727	0.273	0.14	0.86	0.65	0.35	0.069	0.552	0.207	0.172	0.848	0.152	0	0.8	0.2	0.171	0.829	0.062	0.338	0.537	0.037	0	0.025	1	0.786	0.214	0.089	0.375	0.321	0.214	0.061	0.939	0.019	0.075	0.132	0.491	0.226	0.057	0.235
lcl|NM_001039130.1_cds_NP_001034219.1_1	ALOX15B	arachidonate 15-lipoxygenase B isoform a	0.120479	1.1149	0.146	0.521	0.104	0.229	0.636	0.364	0.556	0.444	0.182	0.818	0.844	0.156	0.089	0.489	0.267	0.156	0.824	0.176	0.138	0.793	0.069	0.217	0.783	0.064	0.244	0.564	0.026	0	0.103	1	0.571	0.429	0.275	0.353	0.118	0.255	0.086	0.914	0.062	0.25	0.062	0.281	0.281	0.062	0.293
lcl|NM_001039131.2_cds_NP_001034220.1_1	ALOX15B	arachidonate 15-lipoxygenase B isoform b	0.119492	1.10763	0.13	0.522	0.109	0.239	0.636	0.364	0.583	0.417	0.158	0.842	0.862	0.138	0.095	0.5	0.286	0.119	0.824	0.176	0.16	0.76	0.08	0.227	0.773	0.053	0.237	0.579	0.026	0	0.105	1	0.55	0.45	0.26	0.36	0.12	0.26	0.062	0.938	0	0.276	0.069	0.276	0.31	0.069	0.314
lcl|NM_001039132.3_cds_NP_001034221.1_1	ICAM4	intercellular adhesion molecule 4 isoform 3 precursor	0.161798	1.59282	0.15	0.4	0.35	0.1	0.727	0.273	0.5	0.5	0.333	0.667	0.625	0.375	0.172	0.207	0.31	0.31	0.5	0.5	0.5	0.5	0	0.273	0.727	0.138	0.31	0.345	0.138	0	0.069	1	0.25	0.75	0.069	0.207	0.31	0.414	0.538	0.462	0.037	0.148	0.148	0.333	0.259	0.074	0.458
lcl|NM_001040007.3_cds_NP_001035096.1_1	RSPO4	R-spondin-4 isoform 2 precursor	0.100759	0.977322	0	0.833	0.167	0	0.647	0.353	1	0	0.143	0.857	0.833	0.167	0	0.765	0.235	0	1	0	0	1	0	0.154	0.846	0	0.294	0.588	0	0	0.118	1	1	0	0.182	0.455	0.273	0.091	0.083	0.917	0	0.409	0.045	0.318	0.227	0	0.6
lcl|NM_001042729.2_cds_NP_001036194.1_1	FGR	tyrosine-protein kinase Fgr	0.11875	1.11561	0.205	0.487	0.128	0.179	0.818	0.182	0.633	0.367	0.256	0.744	0.696	0.304	0.047	0.581	0.279	0.093	0.8	0.2	0	0.786	0.214	0.172	0.828	0	0.188	0.646	0.042	0	0.125	1	0.812	0.188	0.233	0.367	0.2	0.2	0.136	0.864	0.148	0.185	0.074	0.185	0.333	0.074	0.29
lcl|NM_001044390.3_cds_NP_001037855.1_1	MUC1	mucin-1 isoform 5 precursor	0.167461	1.59024	0.278	0.389	0.111	0.222	0.5	0.5	0.25	0.75	0.167	0.833	0.444	0.556	0.067	0.267	0.333	0.333	0.25	0.75	0.286	0.429	0.286	0.143	0.857	0	0.222	0.556	0.056	0.056	0.111	1	0.667	0.333	0.412	0.235	0.118	0.235	0	1	0.375	0	0.125	0.25	0.125	0.125	0.32
lcl|NM_001044392.3_cds_NP_001037857.1_1	MUC1	mucin-1 isoform 7 precursor	0.165573	1.54181	0.385	0.308	0	0.308	0.5	0.5	0.5	0.5	0.375	0.625	0.5	0.5	0.1	0.2	0.2	0.5	0.25	0.75	0	0.5	0.5	0.2	0.8	0	0.273	0.545	0.091	0	0.091	1	0.5	0.5	0.214	0.429	0.071	0.286	0.167	0.833	0.286	0	0.143	0.286	0.143	0.143	0.364
lcl|NM_001045.6_cds_NP_001036.1_1	SLC6A4	sodium-dependent serotonin transporter	0.127054	1.20338	0.196	0.391	0.152	0.261	0.778	0.222	0.556	0.444	0.444	0.556	0.651	0.349	0.24	0.24	0.36	0.16	0.714	0.286	0.125	0.643	0.232	0.429	0.571	0.082	0.311	0.393	0.082	0.016	0.115	1	0.545	0.455	0.3	0.3	0.167	0.233	0.278	0.722	0	0.316	0.105	0.211	0.316	0.053	0.268
lcl|NM_001077401.2_cds_NP_001070869.1_1	ACVRL1	serine/threonine-protein kinase receptor R3 precursor	0.12456	1.19111	0.172	0.552	0.103	0.172	0.778	0.222	0.792	0.208	0.103	0.897	0.667	0.333	0.103	0.615	0.205	0.077	0.789	0.211	0	0.8	0.2	0.316	0.684	0.066	0.164	0.623	0.016	0	0.131	1	0.812	0.188	0.179	0.429	0.179	0.214	0.13	0.87	0.114	0.229	0.057	0.2	0.371	0.029	0.294
lcl|NM_001079668.3_cds_NP_001073136.1_1	NKX2-1	homeobox protein Nkx-2.1 isoform 1	0.0971139	0.946071	0.073	0.382	0.509	0.036	1	0	1	0	0.111	0.889	1	0	0.055	0.709	0.182	0.055	1	0	0	1	0	0.267	0.733	0.077	0.154	0.654	0.038	0	0.077	1	1	0	0.167	0.267	0.567	0	0.105	0.895	0	0.227	0.136	0.5	0.136	0	0.415
lcl|NM_001080537.2_cds_NP_001074006.1_1	SNTN	sentan isoform 2	0.148858	1.41552	0.273	0.273	0	0.455	0.667	0.333	0.3	0.7	0.7	0.3	0.6	0.4	0.4	0.2	0	0.4	1	0	0.2	0.3	0.5	0.8	0.2	0.118	0.118	0.412	0.176	0.059	0.118	1	0	1	0.333	0.333	0	0.333	0.833	0.167	0.286	0.571	0	0	0.143	0	0.071
lcl|NM_001083924.2_cds_NP_001077393.1_1	C1orf116	specifically androgen-regulated gene protein isoform 2	0.144715	1.33329	0.211	0.263	0	0.526	0	1	0.455	0.545	0.222	0.778	0.75	0.25	0.292	0.292	0.25	0.167	0.833	0.167	0	0.667	0.333	0.241	0.759	0.081	0.108	0.595	0.054	0.054	0.108	1	0.5	0.5	0.34	0.298	0.064	0.298	0.286	0.714	0.238	0.143	0.095	0.238	0.143	0.143	0.289
lcl|NM_001089.3_cds_NP_001080.2_1	ABCA3	ATP-binding cassette sub-family A member 3	0.0731303	0.701999	0.132	0.639	0.111	0.118	0.821	0.179	0.853	0.147	0.228	0.772	0.817	0.183	0.153	0.432	0.324	0.09	0.857	0.143	0.012	0.852	0.136	0.237	0.763	0.004	0.279	0.602	0.066	0.004	0.044	1	0.841	0.159	0.167	0.41	0.205	0.218	0.075	0.925	0.096	0.277	0.053	0.202	0.33	0.043	0.325
lcl|NM_001093770.3_cds_NP_001087239.2_1	SFTPA1	pulmonary surfactant-associated protein A1 isoform 2 precursor	0.147529	1.35396	0.3	0.5	0.05	0.15	0.4	0.6	0.583	0.417	0.167	0.833	0.667	0.333	0.35	0.275	0.2	0.175	0.5	0.5	0.1	0.6	0.3	0.286	0.714	0.056	0.333	0.5	0.056	0	0.056	1	0.5	0.5	0.333	0.167	0	0.5	0.222	0.778	0.267	0.4	0.133	0.133	0.067	0	0.333
lcl|NM_001098514.2_cds_NP_001091984.2_1	C16orf89	UPF0764 protein C16orf89 isoform 2 precursor	0.126994	1.20805	0.231	0.538	0.038	0.192	0.9	0.1	0.625	0.375	0.44	0.56	0.812	0.188	0.208	0.333	0.417	0.042	0.714	0.286	0	0.75	0.25	0.385	0.615	0.074	0.278	0.574	0	0.037	0.037	1	1	0	0.4	0.32	0.12	0.16	0.19	0.81	0.381	0.238	0.095	0.143	0.143	0	0.3
lcl|NM_001098835.2_cds_NP_001092305.1_1	MS4A15	membrane-spanning 4-domains subfamily A member 15 isoform 1	0.139498	1.30716	0.241	0.586	0.103	0.069	1	0	0.667	0.333	0	1	0.706	0.294	0.273	0.455	0.227	0.045	0.8	0.2	0	0.765	0.235	0.5	0.5	0.048	0.333	0.476	0.048	0	0.095	1	0.778	0.222	0.304	0.304	0.174	0.217	0.375	0.625	0	0.429	0	0.286	0.286	0	0.438
lcl|NM_001099434.1_cds_NP_001092904.1_1	DCDC2B	doublecortin domain-containing protein 2B	0.143471	1.32399	0.222	0.389	0.028	0.361	0.714	0.286	0.615	0.385	0.368	0.632	0.818	0.182	0.2	0.233	0.433	0.133	0.636	0.364	0.286	0.286	0.429	0.059	0.941	0.057	0.229	0.486	0.029	0.029	0.171	1	0.6	0.4	0.417	0.417	0	0.167	0.19	0.81	0.227	0.364	0.136	0.136	0.091	0.045	0.208
lcl|NM_001099640.2_cds_NP_001093110.1_1	TMEM100	transmembrane protein 100	0.166459	1.56106	0.125	0.312	0.125	0.438	1	0	0	0	0.25	0.75	0.333	0.667	0.286	0.286	0.286	0.143	0.5	0.5	0	0.818	0.182	0.25	0.75	0.083	0.167	0.333	0.083	0.083	0.25	1	0	1	0.2	0.6	0	0.2	0.5	0.5	0.5	0.167	0	0.167	0.167	0	0.267
lcl|NM_001099772.2_cds_NP_001093242.1_1	CYP4B1	cytochrome P450 4B1 isoform a	0.122333	1.09678	0.172	0.517	0.034	0.276	0.875	0.125	0.676	0.324	0.182	0.818	0.583	0.417	0.152	0.394	0.333	0.121	0.5	0.5	0	0.8	0.2	0.259	0.741	0.031	0.281	0.5	0.078	0.016	0.094	1	0.625	0.375	0.172	0.414	0.034	0.379	0	1	0.091	0.182	0	0.333	0.303	0.091	0.324
lcl|NM_001100917.2_cds_NP_001094387.1_1	TSPAN19	putative tetraspanin-19	0.127298	1.23092	0.6	0.1	0	0.3	0.125	0.875	0.25	0.75	0.5	0.5	0.438	0.562	0.714	0.071	0	0.214	0.4	0.6	0.269	0.269	0.462	0.529	0.471	0.097	0.097	0.065	0.226	0.387	0.129	1	0.238	0.762	0.5	0	0	0.5	0.444	0.556	1	0	0	0	0	0	0
lcl|NM_001111035.3_cds_NP_001104505.1_1	ACP5	tartrate-resistant acid phosphatase type 5 precursor	0.127141	1.15647	0.071	0.679	0.107	0.143	0.667	0.333	0.789	0.211	0.167	0.833	0.647	0.353	0.087	0.391	0.304	0.217	0.909	0.091	0.083	0.75	0.167	0.2	0.8	0.143	0.114	0.629	0.057	0	0.057	1	0.308	0.692	0.176	0.529	0.059	0.235	0.214	0.786	0	0.3	0.1	0.4	0.2	0	0.15
lcl|NM_001114735.2_cds_NP_001108207.1_1	BCL2A1	bcl-2-related protein A1 isoform 2	0.158887	1.55431	0.125	0.375	0.25	0.25	0.667	0.333	0.714	0.286	0.636	0.364	0.375	0.625	0.5	0.2	0.1	0.2	1	0	0.333	0.167	0.5	0.417	0.583	0.333	0.083	0.333	0.083	0	0.167	1	0.4	0.6	0.4	0	0.2	0.4	0.6	0.4	0.429	0.429	0.143	0	0	0	0.125
lcl|NM_001114938.3_cds_NP_001108410.2_1	CCDC17	coiled-coil domain-containing protein 17 isoform 1	0.123915	1.183	0.281	0.297	0.203	0.219	0.286	0.714	0.455	0.545	0.295	0.705	0.733	0.267	0.2	0.38	0.34	0.08	0.75	0.25	0.154	0.308	0.538	0	1	0.148	0.148	0.395	0.148	0.025	0.136	1	0.625	0.375	0.333	0.362	0.116	0.188	0.233	0.767	0.117	0.2	0.083	0.217	0.35	0.033	0.239
lcl|NM_001127628.2_cds_NP_001121100.1_1	FBP1	fructose-1,6-bisphosphatase 1	0.145272	1.41427	0.1	0.5	0.167	0.233	0.571	0.429	0.583	0.417	0.235	0.765	0.545	0.455	0.222	0.407	0.222	0.148	0.8	0.2	0.176	0.529	0.294	0.296	0.704	0	0.2	0.5	0.133	0.067	0.1	1	0.846	0.154	0.125	0.5	0.188	0.188	0.286	0.714	0.154	0.385	0	0.308	0.154	0	0.1
lcl|NM_001130046.2_cds_NP_001123518.1_1	CCL20	C-C motif chemokine 20 isoform 2 precursor	0.130847	1.2681	0.333	0.167	0	0.5	0.571	0.429	1	0	1	0	0.25	0.75	0.25	0.75	0	0	0.667	0.333	0	0.5	0.5	0.6	0.4	0.071	0.357	0.214	0.143	0	0.214	1	0.4	0.6	0.5	0	0	0.5	0	1	0	0	0	0	0.333	0.667	0.167
lcl|NM_001134.3_cds_NP_001125.1_1	AFP	alpha-fetoprotein isoform 1 precursor	0.129363	1.2353	0.42	0.22	0.06	0.3	0.594	0.406	0.348	0.652	0.678	0.322	0.469	0.531	0.5	0.192	0.154	0.154	0.188	0.812	0.324	0.235	0.441	0.667	0.333	0.15	0.067	0.283	0.15	0.167	0.183	1	0.5	0.5	0.381	0.19	0	0.429	0.575	0.425	0.545	0.227	0.091	0.045	0	0.091	0.237
lcl|NM_001134222.2_cds_NP_001127694.1_1	IRX2	iroquois-class homeodomain protein IRX-2	0.0880464	0.868392	0.043	0.486	0.429	0.043	1	0	0.885	0.115	0.1	0.9	1	0	0.021	0.75	0.188	0.042	1	0	0	1	0	0.083	0.917	0.054	0.297	0.514	0.054	0	0.081	1	1	0	0.058	0.462	0.462	0.019	0	1	0.111	0	0	0.556	0.333	0	0.311
lcl|NM_001135146.2_cds_NP_001128618.1_1	SLC39A8	zinc transporter ZIP8 isoform a precursor	0.140951	1.38018	0.302	0.279	0.163	0.256	0.364	0.636	0.154	0.846	0.391	0.609	0.459	0.541	0.419	0.209	0.233	0.14	0.538	0.462	0.207	0.276	0.517	0.556	0.444	0.145	0.194	0.242	0.113	0.113	0.194	1	0.238	0.762	0.476	0.19	0.095	0.238	0.375	0.625	0.5	0	0.125	0.25	0.125	0	0.167
lcl|NM_001135147.1_cds_NP_001128619.1_1	SLC39A8	zinc transporter ZIP8 isoform b precursor	0.14686	1.43854	0.31	0.262	0.167	0.262	0.364	0.636	0.214	0.786	0.35	0.65	0.394	0.606	0.359	0.231	0.256	0.154	0.5	0.5	0.276	0.31	0.414	0.579	0.421	0.133	0.183	0.25	0.15	0.117	0.167	1	0.25	0.75	0.476	0.19	0.095	0.238	0.438	0.562	0.375	0.125	0.125	0.25	0.125	0	0.161
lcl|NM_001135300.1_cds_NP_001128772.1_1	IL1RL1	interleukin-1 receptor-like 1 precursor	0.146011	1.41786	0.261	0.217	0.13	0.391	0	1	0.385	0.615	0.667	0.333	0.357	0.643	0.353	0.294	0.176	0.176	0.833	0.167	0.167	0.222	0.611	0.526	0.474	0.133	0.1	0.233	0.2	0.133	0.2	1	0.05	0.95	0.417	0.167	0	0.417	0.667	0.333	0.6	0.333	0	0	0	0.067	0.048
lcl|NM_001135685.2_cds_NP_001129157.1_1	LTK	leukocyte tyrosine kinase receptor isoform 3 precursor	0.109114	1.062	0.125	0.518	0.196	0.161	0.708	0.292	0.615	0.385	0.244	0.756	0.7	0.3	0.156	0.367	0.389	0.089	0.824	0.176	0.095	0.619	0.286	0.357	0.643	0.023	0.261	0.602	0.034	0	0.08	1	0.733	0.267	0.226	0.323	0.194	0.258	0.156	0.844	0.104	0.188	0.125	0.229	0.333	0.021	0.328
lcl|NM_001136.5_cds_NP_001127.1_1	AGER	advanced glycosylation end product-specific receptor isoform 1 precursor	0.135756	1.24952	0.258	0.484	0	0.258	0.167	0.833	0.286	0.714	0.361	0.639	1	0	0.367	0.184	0.347	0.102	0.833	0.167	0.062	0.625	0.312	0.133	0.867	0.054	0.162	0.514	0.135	0	0.135	1	0.6	0.4	0.214	0.429	0.024	0.333	0.263	0.737	0.043	0.174	0.13	0.087	0.304	0.261	0.357
lcl|NM_001136536.5_cds_NP_001130008.2_1	DTHD1	death domain-containing protein 1 isoform 2	0.12845	1.23881	0.318	0.318	0	0.364	0.4	0.6	0.321	0.679	0.639	0.361	0.375	0.625	0.444	0.222	0.148	0.185	0.421	0.579	0.405	0.189	0.405	0.627	0.373	0.053	0.2	0.147	0.227	0.187	0.187	1	0.519	0.481	0.553	0.053	0	0.395	0.5	0.5	0.379	0.207	0.103	0.103	0.069	0.138	0.161
lcl|NM_001140.5_cds_NP_001131.3_1	ALOX15	arachidonate 15-lipoxygenase	0.119898	1.16834	0.087	0.5	0.087	0.326	0.538	0.462	0.694	0.306	0.364	0.636	0.692	0.308	0.204	0.367	0.347	0.082	0.765	0.235	0.115	0.577	0.308	0.281	0.719	0.068	0.182	0.568	0.08	0.034	0.068	1	0.688	0.312	0.146	0.366	0.098	0.39	0.121	0.879	0.075	0.175	0.125	0.275	0.35	0	0.219
lcl|NM_001141.3_cds_NP_001132.2_1	ALOX15B	arachidonate 15-lipoxygenase B isoform d	0.118231	1.09345	0.143	0.531	0.102	0.224	0.636	0.364	0.571	0.429	0.178	0.822	0.844	0.156	0.087	0.478	0.283	0.152	0.842	0.158	0.125	0.812	0.062	0.217	0.783	0.06	0.238	0.571	0.036	0	0.095	1	0.591	0.409	0.283	0.34	0.132	0.245	0.083	0.917	0.057	0.257	0.086	0.257	0.286	0.057	0.293
lcl|NM_001142782.2_cds_NP_001136254.1_1	MAGI3	membrane-associated guanylate kinase, WW and PDZ domain-containing protein 3 isoform 1	0.088994	0.858465	0.375	0.264	0.042	0.319	0.438	0.562	0.314	0.686	0.566	0.434	0.417	0.583	0.375	0.227	0.203	0.195	0.459	0.541	0.195	0.273	0.532	0.654	0.346	0.123	0.16	0.226	0.189	0.132	0.17	1	0.343	0.657	0.389	0.212	0.035	0.363	0.292	0.708	0.36	0.213	0.133	0.093	0.133	0.067	0.197
lcl|NM_001142807.4_cds_NP_001136279.1_1	ACOXL	acyl-coenzyme A oxidase-like protein isoform 1	0.133726	1.28771	0.232	0.429	0.107	0.232	0.5	0.5	0.462	0.538	0.419	0.581	0.321	0.679	0.378	0.081	0.324	0.216	0.625	0.375	0.269	0.385	0.346	0.265	0.735	0.031	0.169	0.492	0.046	0.092	0.169	1	0.579	0.421	0.292	0.25	0.167	0.292	0.222	0.778	0.2	0.25	0.05	0.125	0.325	0.05	0.367
lcl|NM_001144033.1_cds_NP_001137505.1_1	STOML3	stomatin-like protein 3 isoform 2	0.167344	1.59795	0.154	0.385	0.038	0.423	0.75	0.25	0.3	0.7	0.438	0.562	0.429	0.571	0.267	0.267	0.2	0.267	0.333	0.667	0.174	0.565	0.261	0.429	0.571	0.03	0.121	0.424	0.152	0.091	0.182	1	0.417	0.583	0.4	0.4	0	0.2	0.333	0.667	0.353	0	0.176	0.118	0.235	0.118	0.167
lcl|NM_001144960.3_cds_NP_001138432.1_1	ANKUB1	protein ANKUB1 isoform 1	0.136876	1.31048	0.429	0.238	0.048	0.286	0.467	0.533	0.455	0.545	0.692	0.308	0.417	0.583	0.44	0.2	0.16	0.2	0.4	0.6	0.208	0.167	0.625	0.64	0.36	0.066	0.246	0.295	0.18	0.131	0.082	1	0.583	0.417	0.423	0.308	0.077	0.192	0.625	0.375	0.286	0.333	0.19	0.095	0.095	0	0.191
lcl|NM_001145457.3_cds_NP_001138929.2_1	NCR1	natural cytotoxicity triggering receptor 1 isoform b precursor	0.15911	1.51173	0.176	0.588	0.059	0.176	0.571	0.429	0.818	0.182	0.421	0.579	0.615	0.385	0.368	0.316	0.316	0	0.5	0.5	0	0.75	0.25	0.364	0.636	0.086	0.314	0.371	0.143	0.057	0.029	1	0.778	0.222	0.2	0.4	0.1	0.3	0.214	0.786	0.316	0.263	0.105	0.105	0.158	0.053	0.429
lcl|NM_001145458.3_cds_NP_001138930.2_1	NCR1	natural cytotoxicity triggering receptor 1 isoform c precursor	0.157556	1.49943	0.176	0.588	0.059	0.176	0.571	0.429	0.8	0.2	0.444	0.556	0.615	0.385	0.353	0.294	0.353	0	0.5	0.5	0	0.75	0.25	0.3	0.7	0.094	0.312	0.406	0.125	0.031	0.031	1	0.778	0.222	0.2	0.4	0.1	0.3	0.231	0.769	0.316	0.263	0.105	0.105	0.158	0.053	0.429
lcl|NM_001145648.3_cds_NP_001139120.1_1	RASGRF1	ras-specific guanine nucleotide-releasing factor 1 isoform 3	0.0925351	0.888129	0.167	0.59	0.103	0.141	0.619	0.381	0.672	0.328	0.267	0.733	0.633	0.367	0.178	0.467	0.267	0.089	0.677	0.323	0.096	0.723	0.181	0.287	0.713	0.03	0.256	0.571	0.038	0.045	0.06	1	0.655	0.345	0.218	0.418	0.164	0.2	0.245	0.755	0.113	0.197	0.056	0.352	0.239	0.042	0.283
lcl|NM_001145734.2_cds_NP_001139206.2_1	CDC20B	cell division cycle protein 20 homolog B isoform 2	0.145098	1.40353	0.276	0.241	0.103	0.379	0.5	0.5	0.318	0.682	0.44	0.56	0.091	0.909	0.273	0.242	0.273	0.212	0.467	0.533	0.35	0.3	0.35	0.516	0.484	0.089	0.2	0.422	0.133	0.067	0.089	1	0.421	0.579	0.235	0.294	0.176	0.294	0.458	0.542	0.25	0.292	0.042	0.167	0.167	0.083	0.13
lcl|NM_001164115.2_cds_NP_001157587.1_1	CASS4	cas scaffolding protein family member 4 isoform c	0.138234	1.33091	0.2	0.433	0.233	0.133	0.667	0.333	1	0	0.25	0.75	0.625	0.375	0.211	0.421	0.316	0.053	0.778	0.222	0.143	0.786	0.071	0.188	0.812	0.025	0.375	0.45	0.075	0.05	0.025	1	0.6	0.4	0.171	0.415	0.049	0.366	0.304	0.696	0.25	0.3	0	0.2	0.2	0.05	0.577
lcl|NM_001164436.2_cds_NP_001157908.1_1	TMEM212	transmembrane protein 212	0.163304	1.52811	0.278	0.222	0	0.5	0.429	0.571	1	0	0.6	0.4	0.429	0.571	0.333	0.267	0.333	0.067	0.75	0.25	0.154	0.385	0.462	0.5	0.5	0.143	0.179	0.25	0.25	0.036	0.143	1	0.5	0.5	0.571	0	0	0.429	0.4	0.6	0.4	0.2	0.2	0	0.2	0	0.167
lcl|NM_001167911.2_cds_NP_001161383.1_1	VEPH1	ventricular zone-expressed PH domain-containing protein homolog 1 isoform 2	0.110461	1.05462	0.438	0.271	0	0.292	0.714	0.286	0.619	0.381	0.697	0.303	0.562	0.438	0.344	0.281	0.219	0.156	0.286	0.714	0.237	0.39	0.373	0.516	0.484	0.071	0.262	0.321	0.119	0.06	0.167	1	0.486	0.514	0.387	0.161	0.032	0.419	0.452	0.548	0.5	0.263	0.079	0.105	0.053	0	0.25
lcl|NM_001167912.2_cds_NP_001161384.1_1	VEPH1	ventricular zone-expressed PH domain-containing protein homolog 1 isoform 1	0.108244	1.03061	0.423	0.269	0	0.308	0.714	0.286	0.619	0.381	0.686	0.314	0.528	0.472	0.324	0.265	0.235	0.176	0.304	0.696	0.233	0.383	0.383	0.5	0.5	0.068	0.261	0.341	0.114	0.057	0.159	1	0.486	0.514	0.382	0.176	0.029	0.412	0.426	0.574	0.513	0.256	0.077	0.103	0.051	0	0.258
lcl|NM_001167915.2_cds_NP_001161387.1_1	VEPH1	ventricular zone-expressed PH domain-containing protein homolog 1 isoform 3	0.155617	1.49414	0.588	0.176	0	0.235	0.6	0.4	0.538	0.462	0.714	0.286	0.5	0.5	0.111	0.111	0.556	0.222	0.333	0.667	0.167	0.389	0.444	0.417	0.583	0	0.192	0.269	0.115	0.192	0.231	1	0.5	0.5	0.167	0.5	0	0.333	0.714	0.286	0.667	0.083	0.25	0	0	0	0.263
lcl|NM_001168235.2_cds_NP_001161707.1_1	FREM3	FRAS1-related extracellular matrix protein 3 precursor	0.0678737	0.650787	0.181	0.4	0.124	0.295	0.625	0.375	0.58	0.42	0.463	0.537	0.656	0.344	0.27	0.291	0.27	0.17	0.6	0.4	0.14	0.455	0.405	0.469	0.531	0.086	0.209	0.373	0.164	0.05	0.118	1	0.5	0.5	0.308	0.323	0.075	0.293	0.336	0.664	0.252	0.233	0.078	0.194	0.165	0.078	0.258
lcl|NM_001170331.2_cds_NP_001163802.1_1	LANCL3	lanC-like protein 3 isoform 2	0.133458	1.32462	0.062	0.479	0.25	0.208	0.6	0.4	0.846	0.154	0.393	0.607	0.7	0.3	0.132	0.5	0.316	0.053	0.5	0.5	0.133	0.4	0.467	0.316	0.684	0.019	0.264	0.472	0.132	0.019	0.094	1	0.5	0.5	0.333	0.278	0.278	0.111	0.143	0.857	0.048	0.095	0.095	0.429	0.333	0	0.25
lcl|NM_001170402.1_cds_NP_001163873.1_1	CDC20B	cell division cycle protein 20 homolog B isoform 3	0.142237	1.3693	0.25	0.281	0.094	0.375	0.462	0.538	0.28	0.72	0.44	0.56	0.091	0.909	0.333	0.205	0.282	0.179	0.5	0.5	0.333	0.333	0.333	0.485	0.515	0.083	0.188	0.396	0.146	0.083	0.104	1	0.429	0.571	0.263	0.316	0.158	0.263	0.407	0.593	0.24	0.28	0.04	0.2	0.16	0.08	0.155
lcl|NM_001170700.3_cds_NP_001164171.2_1	DTHD1	death domain-containing protein 1 isoform 1	0.108103	1.03386	0.389	0.278	0	0.333	0.409	0.591	0.317	0.683	0.643	0.357	0.407	0.593	0.318	0.273	0.205	0.205	0.414	0.586	0.475	0.153	0.373	0.614	0.386	0.07	0.17	0.2	0.22	0.17	0.17	1	0.417	0.583	0.558	0.093	0	0.349	0.435	0.565	0.429	0.171	0.086	0.086	0.057	0.171	0.154
lcl|NM_001172632.1_cds_NP_001166103.1_1	OLR1	oxidized low-density lipoprotein receptor 1 isoform 2	0.153776	1.43421	0.286	0.143	0.071	0.5	0.667	0.333	0.429	0.571	0.562	0.438	0.429	0.571	0.6	0.1	0.2	0.1	0.75	0.25	0.167	0.333	0.5	0.5	0.5	0.222	0.111	0.333	0.259	0.074	0	1	0.25	0.75	0.5	0.333	0	0.167	0.412	0.588	0.25	0	0	0	0.75	0	0.077
lcl|NM_001172633.1_cds_NP_001166104.1_1	OLR1	oxidized low-density lipoprotein receptor 1 isoform 3	0.151225	1.41324	0.231	0.154	0.077	0.538	0.5	0.5	0.5	0.5	0.588	0.412	0	1	0.5	0.25	0.125	0.125	0.75	0.25	0.143	0.429	0.429	0.444	0.556	0.185	0.111	0.333	0.185	0.074	0.111	1	0.4	0.6	0.25	0	0.25	0.5	0.529	0.471	0.333	0	0	0	0.667	0	0.133
lcl|NM_001174051.3_cds_NP_001167522.1_1	CACNA2D2	voltage-dependent calcium channel subunit alpha-2/delta-2 isoform c precursor	0.0938667	0.879516	0.157	0.542	0.096	0.205	0.714	0.286	0.657	0.343	0.129	0.871	0.755	0.245	0.13	0.623	0.159	0.087	0.9	0.1	0.049	0.732	0.22	0.151	0.849	0.074	0.197	0.598	0.057	0.016	0.057	1	0.783	0.217	0.114	0.414	0.257	0.214	0.102	0.898	0.123	0.215	0.062	0.277	0.246	0.077	0.387
lcl|NM_001177355.3_cds_NP_001170826.1_1	MSLN	mesothelin isoform 1 preproprotein	0.107476	1.03185	0.055	0.473	0.2	0.273	0.583	0.417	0.824	0.176	0.194	0.806	0.889	0.111	0.227	0.364	0.341	0.068	0.833	0.167	0.059	0.824	0.118	0.182	0.818	0.098	0.235	0.549	0.039	0	0.078	1	0.667	0.333	0.135	0.5	0.154	0.212	0.125	0.875	0	0.143	0.048	0.286	0.476	0.048	0.349
lcl|NM_001177520.3_cds_NP_001170991.1_1	ALPL	alkaline phosphatase, tissue-nonspecific isozyme isoform 3	0.128555	1.1998	0.119	0.595	0.143	0.143	0.333	0.667	0.96	0.04	0.217	0.783	0.833	0.167	0.077	0.513	0.282	0.128	0.75	0.25	0	0.786	0.214	0.368	0.632	0.054	0.216	0.568	0.054	0	0.108	1	0.727	0.273	0.091	0.636	0.091	0.182	0	1	0.25	0.2	0.05	0.15	0.25	0.1	0.303
lcl|NM_001177998.2_cds_NP_001171469.2_1	SLC34A2	sodium-dependent phosphate transport protein 2B isoform b	0.115734	1.12083	0.174	0.543	0.087	0.196	0.862	0.138	0.292	0.708	0.25	0.75	0.737	0.263	0.244	0.341	0.317	0.098	0.5	0.5	0.105	0.596	0.298	0.342	0.658	0.012	0.265	0.41	0.096	0.024	0.193	1	0.821	0.179	0.081	0.486	0.189	0.243	0.125	0.875	0.238	0.095	0.048	0.476	0.143	0	0.28
lcl|NM_001178147.2_cds_NP_001171618.1_1	CSF3	granulocyte colony-stimulating factor isoform d precursor	0.136838	1.27387	0.19	0.667	0.048	0.095	1	0	0.75	0.25	0.5	0.5	0.833	0.167	0.231	0.385	0.231	0.154	0.5	0.5	0	1	0	0	1	0.032	0.194	0.581	0.065	0.032	0.097	1	0	0	0	0.636	0.091	0.273	0.111	0.889	0	0.2	0	0.6	0.2	0	0.5
lcl|NM_001190182.2_cds_NP_001177111.1_1	CCDC17	coiled-coil domain-containing protein 17 isoform 2	0.125759	1.19888	0.281	0.297	0.203	0.219	0.286	0.714	0.455	0.545	0.295	0.705	0.733	0.267	0.2	0.38	0.34	0.08	0.75	0.25	0.154	0.308	0.538	0	1	0.128	0.154	0.397	0.154	0.026	0.141	1	0.625	0.375	0.333	0.362	0.116	0.188	0.244	0.756	0.119	0.203	0.085	0.22	0.339	0.034	0.244
lcl|NM_001190789.1_cds_NP_001177718.1_1	NCF2	neutrophil cytosol factor 2 isoform 3	0.130654	1.21195	0.25	0.393	0.036	0.321	0.75	0.25	0.609	0.391	0.524	0.476	0.5	0.5	0.083	0.292	0.583	0.042	1	0	0.125	0.5	0.375	0.378	0.622	0.024	0.214	0.476	0.143	0.024	0.119	1	0.688	0.312	0.273	0.364	0.061	0.303	0.25	0.75	0.25	0.062	0.188	0	0.438	0.062	0.346
lcl|NM_001190794.1_cds_NP_001177723.1_1	NCF2	neutrophil cytosol factor 2 isoform 2	0.129468	1.20394	0.226	0.387	0.065	0.323	0.75	0.25	0.583	0.417	0.5	0.5	0.474	0.526	0.077	0.346	0.538	0.038	1	0	0.118	0.529	0.353	0.326	0.674	0.065	0.196	0.478	0.13	0.022	0.109	1	0.647	0.353	0.306	0.333	0.056	0.306	0.258	0.742	0.278	0.056	0.222	0	0.389	0.056	0.346
lcl|NM_001195037.2_cds_NP_001181966.1_1	ECT2L	epithelial cell-transforming sequence 2 oncogene-like	0.112672	1.09036	0.367	0.224	0.061	0.347	0.647	0.353	0.395	0.605	0.651	0.349	0.562	0.438	0.457	0.171	0.171	0.2	0.409	0.591	0.259	0.241	0.5	0.483	0.517	0.112	0.14	0.29	0.14	0.215	0.103	1	0.364	0.636	0.364	0.303	0.03	0.303	0.405	0.595	0.429	0.268	0.125	0.054	0.071	0.054	0.25
lcl|NM_001195755.2_cds_NP_001182684.1_1	FFAR4	free fatty acid receptor 4 isoform GPR120-S	0.130737	1.27033	0.125	0.438	0.344	0.094	1	0	0.9	0.1	0.3	0.7	0.792	0.208	0.2	0.667	0.067	0.067	1	0	0	0.655	0.345	0.333	0.667	0.019	0.34	0.528	0	0.038	0.075	1	0.7	0.3	0.125	0.438	0.125	0.312	0.3	0.7	0.038	0.115	0.115	0.423	0.308	0	0.308
lcl|NM_001199.4_cds_NP_001190.1_1	BMP1	bone morphogenetic protein 1 isoform 1 precursor	0.1026	0.960334	0.083	0.472	0.167	0.278	0.593	0.407	0.814	0.186	0.136	0.864	0.789	0.211	0.131	0.459	0.328	0.082	0.889	0.111	0	0.677	0.323	0.268	0.732	0	0.362	0.574	0.043	0	0.021	1	0.885	0.115	0.174	0.543	0.087	0.196	0.148	0.852	0.082	0.131	0.082	0.377	0.246	0.082	0.386
lcl|NM_001199219.2_cds_NP_001186148.1_1	INMT	indolethylamine N-methyltransferase isoform 2	0.136029	1.25227	0.042	0.542	0.083	0.333	0.455	0.545	0.6	0.4	0.238	0.762	0.636	0.364	0.05	0.45	0.3	0.2	1	0	0	0.333	0.667	0.118	0.882	0.03	0.273	0.485	0.121	0	0.091	1	0.75	0.25	0.067	0.333	0.333	0.267	0.429	0.571	0	0.1	0.1	0.3	0.4	0.1	0.357
lcl|NM_001201.4_cds_NP_001192.3_1	BMP3	bone morphogenetic protein 3 preproprotein	0.142809	1.37995	0.281	0.344	0.125	0.25	0.75	0.25	0.312	0.688	0.467	0.533	0.5	0.5	0.429	0.25	0.214	0.107	0.4	0.6	0.091	0.318	0.591	0.351	0.649	0.044	0.222	0.4	0.156	0.067	0.111	1	0.471	0.529	0.273	0.152	0.152	0.424	0.217	0.783	0.286	0.257	0.029	0.2	0.229	0	0.209
lcl|NM_001204285.2_cds_NP_001191214.1_1	MUC1	mucin-1 isoform 9 precursor	0.131089	1.25138	0.133	0.644	0.044	0.178	0.333	0.667	0.471	0.529	0.5	0.5	0.562	0.438	0.118	0.382	0.176	0.324	0.667	0.333	0	0.364	0.636	0.2	0.8	0	0.235	0.529	0.059	0	0.176	1	0.5	0.5	0.364	0.25	0.205	0.182	0.176	0.824	0.143	0.357	0.214	0.143	0.071	0.071	0.284
lcl|NM_001204286.1_cds_NP_001191215.1_1	MUC1	mucin-1 isoform 10 precursor	0.13094	1.25292	0.146	0.625	0.042	0.188	0.333	0.667	0.471	0.529	0.5	0.5	0.562	0.438	0.118	0.382	0.176	0.324	0.667	0.333	0	0.364	0.636	0.273	0.727	0	0.235	0.529	0.059	0	0.176	1	0.5	0.5	0.348	0.261	0.196	0.196	0.176	0.824	0.143	0.357	0.214	0.143	0.071	0.071	0.284
lcl|NM_001204288.2_cds_NP_001191217.1_1	MUC1	mucin-1 isoform 12 precursor	0.165987	1.62755	0.222	0.278	0.056	0.444	0.333	0.667	0.8	0.2	0.545	0.455	0.625	0.375	0.2	0.25	0.1	0.45	0.375	0.625	0	0.4	0.6	0.571	0.429	0.208	0.125	0.458	0.125	0	0.083	1	0.167	0.833	0.312	0.312	0.25	0.125	0.333	0.667	0.222	0.222	0.333	0.111	0.111	0	0.208
lcl|NM_001204291.1_cds_NP_001191220.1_1	MUC1	mucin-1 isoform 15 precursor	0.167648	1.62167	0.273	0.409	0.091	0.227	0.333	0.667	0.5	0.5	0.375	0.625	0.6	0.4	0.105	0.263	0.263	0.368	0.4	0.6	0	0.5	0.5	0.375	0.625	0	0.227	0.545	0.045	0	0.182	1	0.444	0.556	0.353	0.294	0.059	0.294	0.2	0.8	0.111	0.111	0.333	0.222	0.111	0.111	0.308
lcl|NM_001204292.1_cds_NP_001191221.1_1	MUC1	mucin-1 isoform 16 precursor	0.162217	1.56491	0.304	0.391	0.087	0.217	0.5	0.5	0.5	0.5	0.333	0.667	0.625	0.375	0.125	0.25	0.25	0.375	0.4	0.6	0	0.714	0.286	0.375	0.625	0	0.2	0.6	0.05	0	0.15	1	0.5	0.5	0.368	0.263	0.105	0.263	0.125	0.875	0.222	0	0.333	0.222	0.111	0.111	0.346
lcl|NM_001204293.2_cds_NP_001191222.1_1	MUC1	mucin-1 isoform 17 precursor	0.167072	1.62731	0.3	0.3	0.1	0.3	0	1	0.8	0.2	0.545	0.455	0.583	0.417	0.286	0.214	0.143	0.357	0.667	0.333	0	0.333	0.667	0.5	0.5	0.174	0.174	0.435	0.087	0	0.13	1	0.286	0.714	0.357	0.286	0.286	0.071	0.3	0.7	0.286	0.143	0.429	0	0.143	0	0.192
lcl|NM_001204294.2_cds_NP_001191223.1_1	MUC1	mucin-1 isoform 18 precursor	0.163202	1.56952	0.3	0.4	0.1	0.2	0.5	0.5	0.5	0.5	0.333	0.667	0.625	0.375	0.125	0.25	0.25	0.375	0.4	0.6	0	0.714	0.286	0.286	0.714	0	0.2	0.6	0.05	0	0.15	1	0.5	0.5	0.412	0.235	0.118	0.235	0.125	0.875	0.222	0	0.333	0.222	0.111	0.111	0.346
lcl|NM_001204295.1_cds_NP_001191224.1_1	MUC1	mucin-1 isoform 19 precursor	0.165017	1.53776	0.278	0.333	0.111	0.278	0.333	0.667	0.5	0.5	0.375	0.625	0.5	0.5	0.071	0.286	0.286	0.357	0.25	0.75	0	0.4	0.6	0.2	0.8	0	0.222	0.611	0.056	0	0.111	1	0.5	0.5	0.267	0.4	0.067	0.267	0.167	0.833	0.286	0	0.143	0.286	0.143	0.143	0.348
lcl|NM_001206528.2_cds_NP_001193457.1_1	CRTAC1	cartilage acidic protein 1 isoform B precursor	0.121453	1.15043	0.075	0.604	0.094	0.226	0.692	0.308	0.735	0.265	0.182	0.818	0.7	0.3	0.156	0.422	0.312	0.109	0.545	0.455	0	0.846	0.154	0.118	0.882	0.019	0.308	0.423	0.135	0.058	0.058	1	0.605	0.395	0.147	0.5	0.088	0.265	0.188	0.812	0.091	0.091	0.091	0.25	0.409	0.068	0.286
lcl|NM_001206929.1_cds_NP_001193858.1_1	AGER	advanced glycosylation end product-specific receptor isoform 2 precursor	0.135849	1.25212	0.29	0.484	0	0.226	0.143	0.857	0.286	0.714	0.4	0.6	1	0	0.367	0.184	0.347	0.102	0.833	0.167	0.062	0.625	0.312	0.188	0.812	0.054	0.162	0.514	0.135	0	0.135	1	0.6	0.4	0.209	0.442	0.023	0.326	0.25	0.75	0.111	0.185	0.111	0.074	0.296	0.222	0.367
lcl|NM_001206934.1_cds_NP_001193863.1_1	AGER	advanced glycosylation end product-specific receptor isoform 4 precursor	0.139977	1.28625	0.32	0.4	0	0.28	0.143	0.857	0.222	0.778	0.467	0.533	0.833	0.167	0.324	0.162	0.351	0.162	0.857	0.143	0.077	0.615	0.308	0.25	0.75	0.037	0.185	0.444	0.185	0	0.148	1	0.625	0.375	0.195	0.488	0.024	0.293	0.235	0.765	0.136	0.182	0.091	0.045	0.318	0.227	0.462
lcl|NM_001206940.2_cds_NP_001193869.1_1	AGER	advanced glycosylation end product-specific receptor isoform 6 precursor	0.140008	1.28404	0.28	0.4	0	0.32	0.167	0.833	0.222	0.778	0.423	0.577	0.833	0.167	0.324	0.162	0.351	0.162	0.857	0.143	0.077	0.615	0.308	0.2	0.8	0.037	0.185	0.444	0.185	0	0.148	1	0.625	0.375	0.2	0.475	0.025	0.3	0.25	0.75	0.056	0.167	0.111	0.056	0.333	0.278	0.458
lcl|NM_001207010.2_cds_NP_001193939.1_1	CLEC12A	C-type lectin domain family 12 member A isoform 3	0.139685	1.33936	0.438	0.375	0	0.188	0.222	0.778	0.333	0.667	0.611	0.389	0.333	0.667	0.5	0.125	0.125	0.25	0.6	0.4	0.5	0.278	0.222	0.7	0.3	0.172	0.103	0.241	0.138	0.103	0.241	1	0.579	0.421	0.5	0.1	0	0.4	0.538	0.462	0.538	0.231	0	0	0	0.231	0.16
lcl|NM_001242350.2_cds_NP_001229279.1_1	VNN2	vascular non-inflammatory molecule 2 isoform 3 precursor	0.155794	1.50366	0.444	0.167	0.056	0.333	0.375	0.625	0.667	0.333	0.562	0.438	0.214	0.786	0.375	0.125	0.312	0.188	0.4	0.6	0.4	0.3	0.3	0.5	0.5	0.133	0.167	0.267	0.1	0.1	0.233	1	0.235	0.765	0.471	0.059	0.059	0.412	0.4	0.6	0.3	0.2	0.1	0	0.1	0.3	0.143
lcl|NM_001242356.3_cds_NP_001229285.1_1	NCR1	natural cytotoxicity triggering receptor 1 isoform d precursor	0.16057	1.52047	0.214	0.571	0.071	0.143	0.5	0.5	0.875	0.125	0.364	0.636	0.625	0.375	0.357	0.429	0.214	0	0.5	0.5	0	0.667	0.333	0.167	0.833	0.107	0.321	0.357	0.143	0.071	0	1	0.8	0.2	0.091	0.455	0	0.455	0.111	0.889	0.333	0.333	0.133	0.067	0.067	0.067	0.375
lcl|NM_001242589.3_cds_NP_001229518.1_1	TREM1	triggering receptor expressed on myeloid cells 1 isoform 2 precursor	0.156598	1.50088	0.222	0.333	0	0.444	0.4	0.6	0.4	0.6	0.429	0.571	0.333	0.667	0.2	0.1	0.5	0.2	0.25	0.75	0.3	0.6	0.1	0.286	0.714	0.083	0.167	0.458	0.083	0.083	0.125	1	0.286	0.714	0.167	0.333	0	0.5	0.3	0.7	0.077	0.538	0.154	0.231	0	0	0.25
lcl|NM_001242590.3_cds_NP_001229519.1_1	TREM1	triggering receptor expressed on myeloid cells 1 isoform 3 precursor	0.155512	1.48382	0.4	0.2	0	0.4	0.25	0.75	0.375	0.625	0.455	0.545	0.6	0.4	0.286	0	0.571	0.143	0.25	0.75	0.5	0.5	0	0.364	0.636	0.105	0.158	0.474	0.053	0.105	0.105	1	0.5	0.5	0.167	0.333	0	0.5	0.286	0.714	0	0.455	0.182	0.273	0.091	0	0.2
lcl|NM_001244764.2_cds_NP_001231693.1_1	TNIP3	TNFAIP3-interacting protein 3 isoform 3	0.129261	1.2698	0.2	0.267	0.2	0.333	0.231	0.769	0.579	0.421	0.558	0.442	0.667	0.333	0.571	0.429	0	0	0.364	0.636	0.4	0.2	0.4	0.537	0.463	0.111	0.111	0.333	0.139	0.111	0.194	1	0.316	0.684	0.667	0.067	0.067	0.2	0.387	0.613	0.419	0.194	0.097	0.097	0.194	0	0.1
lcl|NM_001244950.2_cds_NP_001231879.1_1	SPOCK2	testican-2 isoform 2 precursor	0.10737	1.00283	0.121	0.636	0.091	0.152	0.84	0.16	0.722	0.278	0.103	0.897	0.917	0.083	0.105	0.632	0.184	0.079	0.625	0.375	0	0.875	0.125	0.1	0.9	0	0.152	0.788	0.061	0	0	1	0.625	0.375	0.118	0.588	0.294	0	0.136	0.864	0	0.118	0.118	0.353	0.353	0.059	0.455
lcl|NM_001251883.1_cds_NP_001238812.1_1	VIPR1	vasoactive intestinal polypeptide receptor 1 isoform 3	0.150786	1.46467	0	0.7	0.1	0.2	0.857	0.143	0.6	0.4	0.333	0.667	0.467	0.533	0.188	0.375	0.25	0.188	0.75	0.25	0.059	0.824	0.118	0.286	0.714	0.087	0.217	0.565	0.043	0	0.087	1	0.571	0.429	0.267	0.4	0.2	0.133	0.125	0.875	0	0.474	0.105	0.211	0.211	0	0.226
lcl|NM_001251884.1_cds_NP_001238813.1_1	VIPR1	vasoactive intestinal polypeptide receptor 1 isoform 4	0.129209	1.23352	0.077	0.615	0.077	0.231	0.692	0.308	0.692	0.308	0.231	0.769	0.724	0.276	0.062	0.625	0.156	0.156	0.875	0.125	0.111	0.741	0.148	0.2	0.8	0.022	0.304	0.5	0.065	0	0.109	1	0.7	0.3	0.211	0.368	0.158	0.263	0.273	0.727	0	0.32	0.04	0.32	0.28	0.04	0.314
lcl|NM_001258328.3_cds_NP_001245257.1_1	ARHGAP45	rho GTPase-activating protein 45 isoform 2 precursor	0.0865661	0.836249	0.079	0.57	0.202	0.149	0.731	0.269	0.83	0.17	0.099	0.901	0.862	0.138	0.096	0.506	0.277	0.12	0.818	0.182	0.042	0.875	0.083	0.07	0.93	0.041	0.211	0.667	0.065	0	0.016	1	0.913	0.087	0.119	0.493	0.299	0.09	0.068	0.932	0.076	0.114	0.038	0.266	0.405	0.101	0.379
lcl|NM_001267706.1_cds_NP_001254635.1_1	CD274	programmed cell death 1 ligand 1 isoform b precursor	0.147624	1.34853	0.25	0.375	0	0.375	0.5	0.5	0.167	0.833	0.5	0.5	0.625	0.375	0.167	0.333	0.167	0.333	0.143	0.857	0.167	0.583	0.25	0.4	0.6	0.053	0	0.368	0.105	0.211	0.263	1	0.6	0.4	0.5	0.125	0	0.375	0.8	0.2	0.6	0.3	0	0	0	0.1	0.25
lcl|NM_001271082.1_cds_NP_001258011.1_1	NKD2	protein naked cuticle homolog 2 isoform 2	0.137607	1.33329	0.296	0.259	0.222	0.222	0.875	0.125	0.85	0.15	0.097	0.903	0.833	0.167	0.143	0.357	0.393	0.107	1	0	0	0.333	0.667	0.214	0.786	0.1	0.45	0.35	0.05	0	0.05	1	0.875	0.125	0.12	0.48	0.16	0.24	0.077	0.923	0.152	0.333	0.03	0.242	0.182	0.061	0.407
lcl|NM_001271751.2_cds_NP_001258680.1_1	CALCRL	calcitonin gene-related peptide type 1 receptor precursor	0.127208	1.23077	0.423	0.192	0.077	0.308	0.412	0.588	0.467	0.533	0.636	0.364	0.333	0.667	0.524	0.333	0	0.143	0.529	0.471	0.079	0.342	0.579	0.579	0.421	0.056	0.185	0.204	0.204	0.204	0.148	1	0.379	0.621	0.5	0.062	0	0.438	0.632	0.368	0.667	0.083	0.083	0.083	0	0.083	0.172
lcl|NM_001271821.2_cds_NP_001258750.1_1	TREM2	triggering receptor expressed on myeloid cells 2 precursor isoform 2 precursor	0.147518	1.33835	0.154	0.462	0.154	0.231	1	0	0.333	0.667	0.267	0.733	0.833	0.167	0.263	0.263	0.316	0.158	0.7	0.3	0.2	0.6	0.2	0.167	0.833	0.033	0.333	0.5	0.067	0.033	0.033	1	0.5	0.5	0.538	0.308	0	0.154	0.222	0.778	0.077	0.462	0	0.154	0.231	0.077	0.438
lcl|NM_001276392.1_cds_NP_001263321.1_1	LDLRAD1	low-density lipoprotein receptor class A domain-containing protein 1 isoform 2	0.155605	1.44889	0.3	0.5	0	0.2	0.5	0.5	0.571	0.429	0.286	0.714	1	0	0.357	0.357	0.214	0.071	0.556	0.444	0.5	0.25	0.25	0.5	0.5	0	0.333	0.222	0.222	0	0.222	1	1	0	0.267	0.467	0.133	0.133	0.429	0.571	0.091	0.273	0.182	0.273	0.091	0.091	0.357
lcl|NM_001276393.1_cds_NP_001263322.1_1	LDLRAD1	low-density lipoprotein receptor class A domain-containing protein 1 isoform 3	0.141326	1.29803	0	0.667	0	0.333	0.5	0.5	0.571	0.429	0.375	0.625	1	0	0.333	0.4	0.267	0	0.625	0.375	0.5	0.25	0.25	0.5	0.5	0	0.286	0.286	0.143	0	0.286	1	0.8	0.2	0.214	0.429	0.143	0.214	0.333	0.667	0	0.429	0.143	0.429	0	0	0.333
lcl|NM_001276394.2_cds_NP_001263323.1_1	LDLRAD1	low-density lipoprotein receptor class A domain-containing protein 1 isoform 4	0.131621	1.1839	0	0.667	0	0.333	0.5	0.5	0.6	0.4	0.6	0.4	1	0	0.455	0.273	0.273	0	0.667	0.333	0.5	0.5	0	0.5	0.5	0	0.5	0.25	0.25	0	0	1	0.75	0.25	0.154	0.462	0.154	0.231	0.25	0.75	0	0.333	0	0.667	0	0	0.222
lcl|NM_001277126.2_cds_NP_001264055.1_1	NLRP12	NACHT, LRR and PYD domains-containing protein 12 isoform 3	0.0987721	0.952944	0.231	0.354	0.215	0.2	0.69	0.31	0.8	0.2	0.218	0.782	0.763	0.237	0.181	0.431	0.319	0.069	0.759	0.241	0.152	0.727	0.121	0.233	0.767	0.045	0.263	0.453	0.078	0.022	0.14	1	0.684	0.316	0.261	0.435	0.109	0.196	0.148	0.852	0.147	0.373	0.08	0.173	0.213	0.013	0.391
lcl|NM_001277129.1_cds_NP_001264058.1_1	NLRP12	NACHT, LRR and PYD domains-containing protein 12 isoform 4	0.102382	0.988254	0.25	0.317	0.233	0.2	0.692	0.308	0.786	0.214	0.227	0.773	0.757	0.243	0.182	0.424	0.333	0.061	0.778	0.222	0.156	0.719	0.125	0.214	0.786	0.055	0.261	0.448	0.079	0.024	0.133	1	0.657	0.343	0.267	0.422	0.111	0.2	0.157	0.843	0.127	0.394	0.085	0.183	0.197	0.014	0.41
lcl|NM_001278242.2_cds_NP_001265171.1_1	MS4A15	membrane-spanning 4-domains subfamily A member 15 isoform 3	0.141359	1.30587	0.25	0.571	0.107	0.071	1	0	0.667	0.333	0	1	0.692	0.308	0.308	0.231	0.385	0.077	0.667	0.333	0	0.667	0.333	0.5	0.5	0	0.25	0.562	0.062	0	0.125	1	0.778	0.222	0.318	0.273	0.182	0.227	0.429	0.571	0	0.6	0	0	0.4	0	0.4
lcl|NM_001278298.1_cds_NP_001265227.1_1	COL6A5	collagen alpha-5(VI) chain isoform 1 precursor	0.054452	0.509546	0.307	0.27	0.044	0.38	0.333	0.667	0.39	0.61	0.654	0.346	0.341	0.659	0.416	0.212	0.212	0.159	0.345	0.655	0.219	0.4	0.381	0.601	0.399	0.112	0.157	0.256	0.202	0.13	0.143	1	0.4	0.6	0.417	0.148	0.019	0.417	0.476	0.524	0.424	0.256	0.104	0.048	0.096	0.072	0.237
lcl|NM_001282334.1_cds_NP_001269263.1_1	ARHGAP45	rho GTPase-activating protein 45 isoform 3	0.0954933	0.928344	0.067	0.547	0.253	0.133	0.824	0.176	0.861	0.139	0.103	0.897	0.842	0.158	0.121	0.431	0.362	0.086	0.87	0.13	0.125	0.875	0	0.054	0.946	0.042	0.239	0.676	0.028	0	0.014	1	0.944	0.056	0.159	0.455	0.318	0.068	0.065	0.935	0.018	0.127	0.055	0.273	0.436	0.091	0.288
lcl|NM_001282335.2_cds_NP_001269264.1_1	ARHGAP45	rho GTPase-activating protein 45 isoform 4	0.088126	0.846179	0.082	0.571	0.224	0.122	0.76	0.24	0.851	0.149	0.107	0.893	0.846	0.154	0.088	0.515	0.294	0.103	0.867	0.133	0.042	0.875	0.083	0.059	0.941	0.049	0.223	0.68	0.039	0	0.01	1	0.913	0.087	0.091	0.473	0.327	0.109	0.052	0.948	0.029	0.101	0.058	0.29	0.42	0.101	0.354
lcl|NM_001282349.1_cds_NP_001269278.1_1	OSCAR	osteoclast-associated immunoglobulin-like receptor isoform 6 precursor	0.132035	1.26927	0.077	0.538	0.192	0.192	0.833	0.167	0.556	0.444	0.154	0.846	0.75	0.25	0.364	0.273	0.182	0.182	1	0	0	1	0	0	1	0.03	0.182	0.697	0.061	0	0.03	1	1	0	0.209	0.372	0.186	0.233	0.154	0.846	0.167	0.111	0.056	0.389	0.278	0	0.292
lcl|NM_001282350.1_cds_NP_001269279.1_1	OSCAR	osteoclast-associated immunoglobulin-like receptor isoform 7 precursor	0.128746	1.23732	0.077	0.538	0.192	0.192	1	0	0.5	0.5	0.154	0.846	0.778	0.222	0.364	0.273	0.182	0.182	1	0	0	1	0	0	1	0.031	0.188	0.688	0.062	0	0.031	1	1	0	0.22	0.39	0.171	0.22	0.154	0.846	0.167	0.111	0.056	0.389	0.278	0	0.304
lcl|NM_001282941.2_cds_NP_001269870.1_1	RTKN2	rhotekin-2 isoform 2	0.159559	1.52327	0.3	0.3	0.2	0.2	0.333	0.667	0.273	0.727	0.818	0.182	0.333	0.667	0.571	0	0.286	0.143	0.5	0.5	0.462	0.077	0.462	0.846	0.154	0.188	0.188	0.188	0.125	0.25	0.062	1	0.125	0.875	0.25	0.25	0.25	0.25	0.25	0.75	0.091	0.091	0.636	0.182	0	0	0.333
lcl|NM_001286375.2_cds_NP_001273304.1_1	ITGAX	integrin alpha-X isoform 1 precursor	0.0955133	0.920094	0.217	0.446	0.072	0.265	0.571	0.429	0.7	0.3	0.254	0.746	0.729	0.271	0.178	0.344	0.367	0.111	0.792	0.208	0.106	0.596	0.298	0.308	0.692	0.016	0.252	0.561	0.049	0.024	0.098	1	0.723	0.277	0.153	0.593	0.085	0.169	0.2	0.8	0.186	0.288	0.068	0.153	0.153	0.153	0.393
lcl|NM_001289082.2_cds_NP_001276011.1_1	CD300LF	CMRF35-like molecule 1 isoform 2	0.156327	1.44765	0.455	0.091	0	0.455	0.5	0.5	0.75	0.25	0.333	0.667	1	0	0.235	0.412	0.176	0.176	1	0	0	0.5	0.5	0.5	0.5	0.067	0.333	0.2	0.133	0	0.267	1	0.5	0.5	0.417	0.167	0	0.417	0.5	0.5	0.231	0.154	0.154	0.077	0.308	0.077	0.308
lcl|NM_001289083.2_cds_NP_001276012.1_1	CD300LF	CMRF35-like molecule 1 isoform 3 precursor	0.151858	1.38639	0.409	0.091	0	0.5	0.429	0.571	0.615	0.385	0.429	0.571	0.75	0.25	0.19	0.429	0.143	0.238	0.571	0.429	0	0.375	0.625	0.556	0.444	0.043	0.348	0.217	0.174	0	0.217	1	0.571	0.429	0.333	0.167	0	0.5	0.4	0.6	0.267	0.133	0.133	0.133	0.267	0.067	0.286
lcl|NM_001289084.2_cds_NP_001276013.1_1	CD300LF	CMRF35-like molecule 1 isoform 4	0.142412	1.34054	0.235	0.353	0.059	0.353	0.5	0.5	0.786	0.214	0.333	0.667	0.75	0.25	0.222	0.5	0.167	0.111	1	0	0.091	0.455	0.455	0.333	0.667	0	0.325	0.35	0.1	0	0.225	1	0.5	0.5	0.278	0.333	0.167	0.222	0.267	0.733	0.091	0.455	0.091	0.091	0.182	0.091	0.2
lcl|NM_001289085.2_cds_NP_001276014.1_1	CD300LF	CMRF35-like molecule 1 isoform 5	0.139841	1.31409	0.25	0.312	0	0.438	0.5	0.5	0.8	0.2	0.333	0.667	1	0	0.222	0.5	0.167	0.111	1	0	0.083	0.5	0.417	0.312	0.688	0	0.306	0.333	0.111	0	0.25	1	0.5	0.5	0.333	0.267	0.2	0.2	0.294	0.706	0.083	0.5	0.083	0.083	0.167	0.083	0.208
lcl|NM_001289086.2_cds_NP_001276015.1_1	CD300LF	CMRF35-like molecule 1 isoform 6	0.15093	1.41972	0.267	0.267	0.067	0.4	0.5	0.5	0.818	0.182	0.333	0.667	0.75	0.25	0.235	0.412	0.176	0.176	1	0	0.1	0.5	0.4	0.429	0.571	0.036	0.357	0.25	0.107	0	0.25	1	0.5	0.5	0.333	0.2	0	0.467	0.4	0.6	0.154	0.308	0.154	0.077	0.231	0.077	0.133
lcl|NM_001289158.1_cds_NP_001276087.1_1	ADGRE3	adhesion G protein-coupled receptor E3 isoform 2 precursor	0.121926	1.16237	0.111	0.417	0.083	0.389	0.636	0.364	0.444	0.556	0.478	0.522	0.656	0.344	0.323	0.323	0.194	0.161	0.833	0.167	0.062	0.625	0.312	0.583	0.417	0.039	0.338	0.364	0.104	0.026	0.13	1	0.64	0.36	0.421	0.474	0	0.105	0.387	0.613	0.412	0.235	0.118	0	0.176	0.059	0.19
lcl|NM_001289159.2_cds_NP_001276088.1_1	ADGRE3	adhesion G protein-coupled receptor E3 isoform 3 precursor	0.126035	1.20252	0.118	0.412	0.088	0.382	0.636	0.364	0.462	0.538	0.4	0.6	0.677	0.323	0.345	0.31	0.172	0.172	0.833	0.167	0.071	0.643	0.286	0.536	0.464	0.029	0.348	0.377	0.101	0.014	0.13	1	0.652	0.348	0.389	0.5	0	0.111	0.308	0.692	0.385	0.231	0.154	0	0.154	0.077	0.216
lcl|NM_001291468.2_cds_NP_001278397.1_1	CCL4L2	C-C motif chemokine 4-like isoform 1 precursor	0.155942	1.40084	0.25	0.25	0.125	0.375	1	0	0.75	0.25	0.25	0.75	0.333	0.667	0	1	0	0	0	0	0	0	0	0	1	0.182	0.455	0.273	0.091	0	0	1	1	0	0.333	0.333	0	0.333	0.333	0.667	0	0.5	0	0.5	0	0	0.2
lcl|NM_001291469.2_cds_NP_001278398.1_1	CCL4L2	C-C motif chemokine 4-like isoform 2 precursor	0.146186	1.24952	0.286	0.286	0.143	0.286	1	0	0.5	0.5	0	1	0.333	0.667	0	1	0	0	0	0	0	0	0	0	1	0.222	0.556	0.111	0.111	0	0	1	1	0	0.4	0.2	0	0.4	0	1	0	0.5	0	0.5	0	0	0.25
lcl|NM_001291470.2_cds_NP_001278399.1_1	CCL4L2	C-C motif chemokine 4-like isoform 2 precursor	0.144064	1.23176	0.286	0.286	0.143	0.286	1	0	0.5	0.5	0	1	0.333	0.667	0	1	0	0	0	0	0	0	0	0	1	0.222	0.556	0.111	0.111	0	0	1	1	0	0.4	0.2	0	0.4	0	1	0	0.5	0	0.5	0	0	0.25
lcl|NM_001291471.2_cds_NP_001278400.1_1	CCL4L2	C-C motif chemokine 4-like isoform 3 precursor	0.1499	1.40776	0.214	0.286	0.071	0.429	1	0	0.333	0.667	0	1	0.333	0.667	0.6	0.4	0	0	0	1	0	1	0	0.333	0.667	0.3	0.5	0.1	0.1	0	0	1	1	0	0.6	0.1	0.1	0.2	0	1	0.444	0.444	0	0.111	0	0	0.154
lcl|NM_001291472.2_cds_NP_001278401.1_1	CCL4L2	C-C motif chemokine 4-like isoform 4 precursor	0.146992	1.37513	0.231	0.308	0.077	0.385	1	0	0.333	0.667	0	1	0.333	0.667	0.6	0.4	0	0	0	1	0	1	0	0.333	0.667	0.3	0.5	0.1	0.1	0	0	1	1	0	0.6	0.1	0.1	0.2	0	1	0.5	0.375	0	0.125	0	0	0.2
lcl|NM_001291473.2_cds_NP_001278402.1_1	CCL4L2	C-C motif chemokine 4-like isoform 5 precursor	0.14342	1.33946	0.273	0.364	0.091	0.273	1	0	0.333	0.667	0	1	0.333	0.667	0.5	0.5	0	0	0	1	0	0	0	0.333	0.667	0.3	0.5	0.1	0.1	0	0	1	1	0	0.625	0.125	0	0.25	0	1	0.5	0.333	0	0.167	0	0	0.222
lcl|NM_001291474.2_cds_NP_001278403.1_1	CCL4L2	C-C motif chemokine 4-like isoform 6 precursor	0.124019	1.12118	0.5	0.25	0	0.25	1	0	0	1	0	1	1	0	0.5	0.25	0.25	0	1	0	0	1	0	0.167	0.833	0.25	0.5	0.125	0	0.125	0	1	0	0	0.25	0.5	0	0.25	0	1	0	1	0	0	0	0	0.143
lcl|NM_001291475.2_cds_NP_001278404.1_1	CCL4L2	C-C motif chemokine 4-like isoform 7 precursor	0.135706	1.23211	0.286	0.286	0.143	0.286	1	0	0.333	0.667	0	1	0.5	0.5	0.4	0.4	0.2	0	1	0	0	1	0	0	1	0.2	0.5	0.1	0.1	0.1	0	1	1	0	0.25	0.375	0	0.375	0	1	0	0.75	0	0.25	0	0	0.3
lcl|NM_001300730.2_cds_NP_001287659.1_1	CLEC12A	C-type lectin domain family 12 member A isoform 4	0.148984	1.40826	0.385	0.385	0	0.231	0.167	0.833	0.286	0.714	0.688	0.312	0.333	0.667	0.5	0.167	0.167	0.167	0.5	0.5	0.357	0.357	0.286	0.706	0.294	0.154	0.115	0.269	0.115	0.077	0.269	1	0.643	0.357	0.5	0.125	0	0.375	0.545	0.455	0.444	0.222	0	0	0	0.333	0.182
lcl|NM_001300781.1_cds_NP_001287710.1_1	HELT	hairy and enhancer of split-related protein HELT isoform 1	0.133307	1.29826	0.077	0.346	0.423	0.154	1	0	0.667	0.333	0.312	0.688	0.7	0.3	0.067	0.533	0.2	0.2	0.769	0.231	0.2	0.8	0	0.214	0.786	0.036	0.286	0.5	0.071	0	0.107	1	1	0	0.071	0.464	0.357	0.107	0	1	0.133	0.267	0	0.333	0.267	0	0.357
lcl|NM_001301161.2_cds_NP_001288090.1_1	CDHR3	cadherin-related family member 3 isoform 2	0.109297	1.02947	0.195	0.488	0.073	0.244	0.571	0.429	0.438	0.562	0.653	0.347	0.556	0.444	0.288	0.231	0.212	0.269	0.8	0.2	0.178	0.422	0.4	0.45	0.55	0.143	0.257	0.329	0.114	0.014	0.143	1	0.6	0.4	0.5	0.296	0.056	0.148	0.286	0.714	0.487	0.231	0.128	0.128	0	0.026	0.308
lcl|NM_001301347.2_cds_NP_001288276.1_1	FMO2	dimethylaniline monooxygenase	0.161322	1.55072	0.062	0.438	0.125	0.375	0.667	0.333	0.4	0.6	0.526	0.474	0.6	0.4	0.4	0.267	0.133	0.2	0.667	0.333	0.211	0.421	0.368	0.65	0.35	0.083	0.278	0.306	0.167	0.028	0.139	1	0.286	0.714	0.333	0.333	0	0.333	0.5	0.5	0.353	0.059	0.059	0.118	0.176	0.235	0.167
lcl|NM_001304359.2_cds_NP_001291288.1_1	MUC5AC	mucin-5AC precursor	0.0457907	0.462043	0.078	0.54	0.072	0.309	0.799	0.201	0.847	0.153	0.241	0.759	0.789	0.211	0.194	0.38	0.261	0.165	0.743	0.257	0.15	0.771	0.078	0.242	0.758	0.019	0.293	0.591	0.051	0.005	0.042	1	0.871	0.129	0.14	0.36	0.097	0.403	0.088	0.912	0.185	0.227	0.09	0.171	0.256	0.071	0.464
lcl|NM_001308394.2_cds_NP_001295323.1_1	CLEC3B	tetranectin isoform 2	0.07411	0.691799	0	0.733	0.267	0	1	0	0.75	0.25	0	1	0.667	0.333	0	0.786	0.214	0	1	0	0	1	0	0.1	0.9	0	0.133	0.867	0	0	0	1	1	0	0	0.667	0	0.333	0.1	0.9	0	0	0	0.833	0	0.167	0.5
lcl|NM_001315506.2_cds_NP_001302435.1_1	ANKUB1	protein ANKUB1 isoform 3	0.14035	1.3405	0.447	0.211	0.026	0.316	0.5	0.5	0.455	0.545	0.682	0.318	0.435	0.565	0.435	0.217	0.174	0.174	0.4	0.6	0.182	0.182	0.636	0.63	0.37	0.056	0.278	0.296	0.167	0.13	0.074	1	0.5	0.5	0.423	0.308	0.077	0.192	0.682	0.318	0.263	0.421	0.105	0.105	0.105	0	0.186
lcl|NM_001316745.2_cds_NP_001303674.1_1	CCDC141	coiled-coil domain-containing protein 141 isoform 2	0.114729	1.10978	0.289	0.156	0.067	0.489	0.3	0.7	0.467	0.533	0.634	0.366	0.2	0.8	0.35	0.2	0.15	0.3	0.278	0.722	0.4	0.24	0.36	0.439	0.561	0.121	0.121	0.176	0.297	0.165	0.121	1	0.273	0.727	0.167	0.167	0	0.667	0.509	0.491	0.522	0.174	0.087	0.043	0.13	0.043	0.125
lcl|NM_001317778.2_cds_NP_001304707.1_1	SFTPC	pulmonary surfactant-associated protein C isoform 2	0.13915	1.27452	0.278	0.5	0.056	0.167	0.8	0.2	0.6	0.4	0.1	0.9	0.75	0.25	0.125	0.625	0.188	0.062	1	0	0.091	0.636	0.273	0.5	0.5	0	0.286	0.571	0.143	0	0	1	1	0	0.2	0.333	0.333	0.133	0.143	0.857	0.167	0	0.333	0.333	0.167	0	0.429
lcl|NM_001317779.2_cds_NP_001304708.1_1	SFTPC	pulmonary surfactant-associated protein C isoform 3	0.137353	1.2338	0.267	0.533	0.067	0.133	0.75	0.25	0.5	0.5	0.2	0.8	1	0	0.083	0.667	0.25	0	1	0	0.143	0.714	0.143	0.333	0.667	0	0.2	0.733	0.067	0	0	1	1	0	0.167	0.25	0.417	0.167	0.143	0.857	0.333	0	0.333	0.333	0	0	0.385
lcl|NM_001318049.1_cds_NP_001304978.1_1	SDR16C5	epidermal retinol dehydrogenase 2 isoform 1	0.152238	1.49323	0.286	0.321	0	0.393	0.5	0.5	0.333	0.667	0.737	0.263	0.3	0.7	0.52	0.16	0.2	0.12	0.333	0.667	0.176	0.353	0.471	0.577	0.423	0.105	0.132	0.289	0.158	0.184	0.132	1	0.3	0.7	0.6	0.1	0	0.3	0.667	0.333	0.3	0.2	0.2	0	0.3	0	0.045
lcl|NM_001318050.1_cds_NP_001304979.1_1	SDR16C5	epidermal retinol dehydrogenase 2 isoform 3	0.145106	1.41061	0.208	0.333	0	0.458	0.5	0.5	0.5	0.5	0.786	0.214	0.211	0.789	0.545	0.136	0.182	0.136	0.25	0.75	0.267	0.267	0.467	0.478	0.522	0.057	0.2	0.257	0.143	0.143	0.2	1	0.333	0.667	0.556	0.222	0	0.222	0.75	0.25	0.333	0.167	0	0	0.5	0	0.125
lcl|NM_001318932.2_cds_NP_001305861.1_1	FAM216B	protein FAM216B	0.149635	1.4038	0	0.778	0	0.222	0	1	0.5	0.5	0.5	0.5	0	1	0.333	0.333	0.333	0	1	0	0	0.143	0.857	0.429	0.571	0.2	0.133	0.133	0.4	0.067	0.067	1	0.8	0.2	0.2	0.3	0	0.5	0.688	0.312	0.353	0.294	0.059	0.176	0.118	0	0.167
lcl|NM_001319161.2_cds_NP_001306090.1_1	CYP4B1	cytochrome P450 4B1 isoform c	0.124637	1.12034	0.179	0.5	0.036	0.286	0.875	0.125	0.677	0.323	0.182	0.818	0.559	0.441	0.152	0.394	0.333	0.121	0.5	0.5	0	0.842	0.158	0.269	0.731	0.032	0.27	0.508	0.079	0.016	0.095	1	0.625	0.375	0.185	0.444	0.037	0.333	0	1	0.091	0.182	0	0.333	0.303	0.091	0.324
lcl|NM_001319162.2_cds_NP_001306091.1_1	CYP4B1	cytochrome P450 4B1 isoform d	0.133211	1.18839	0.263	0.474	0.053	0.211	0.875	0.125	0.667	0.333	0.235	0.765	0.478	0.522	0.15	0.4	0.25	0.2	0.4	0.6	0	0.846	0.154	0.222	0.778	0.053	0.289	0.526	0.079	0	0.053	1	0.571	0.429	0.176	0.471	0	0.353	0	1	0.074	0.185	0	0.37	0.333	0.037	0.292
lcl|NM_001319216.2_cds_NP_001306145.1_1	CYP1A1	cytochrome P450 1A1 isoform 2	0.12998	1.20893	0.087	0.609	0	0.304	0.375	0.625	0.762	0.238	0.154	0.846	0.69	0.31	0.138	0.483	0.276	0.103	0.786	0.214	0.031	0.656	0.312	0.136	0.864	0.115	0.135	0.596	0.077	0.019	0.058	1	0.5	0.5	0.345	0.379	0.034	0.241	0.211	0.789	0.103	0.207	0.069	0.207	0.414	0	0.282
lcl|NM_001319676.1_cds_NP_001306605.1_1	CAPN9	calpain-9 isoform 3	0.124474	1.1889	0.182	0.432	0.068	0.318	0.6	0.4	0.595	0.405	0.232	0.768	0.659	0.341	0.121	0.394	0.303	0.182	0.75	0.25	0.062	0.562	0.375	0.439	0.561	0.066	0.18	0.557	0.098	0.016	0.082	1	0.522	0.478	0.286	0.286	0.143	0.286	0.192	0.808	0.27	0.135	0.081	0.108	0.351	0.054	0.366
lcl|NM_001320813.2_cds_NP_001307742.1_1	SFTPA2	pulmonary surfactant-associated protein A2 isoform 1 precursor	0.153697	1.40462	0.263	0.474	0.053	0.211	0.375	0.625	0.545	0.455	0.167	0.833	0.833	0.167	0.289	0.289	0.237	0.184	0.5	0.5	0.111	0.556	0.333	0.286	0.714	0.059	0.294	0.529	0.059	0	0.059	1	0.4	0.6	0.269	0.115	0.038	0.577	0.25	0.75	0.286	0.286	0.143	0.143	0.071	0.071	0.333
lcl|NM_001321120.2_cds_NP_001308049.1_1	TBX4	T-box transcription factor TBX4 isoform 1	0.121687	1.18189	0.156	0.533	0.156	0.156	0.5	0.5	0.727	0.273	0.133	0.867	0.762	0.238	0.257	0.371	0.314	0.057	0.773	0.227	0	0.706	0.294	0.269	0.731	0.045	0.364	0.523	0	0.045	0.023	1	0.7	0.3	0.192	0.481	0.212	0.115	0.107	0.893	0.115	0.269	0.192	0.115	0.231	0.077	0.278
lcl|NM_001321232.1_cds_NP_001308161.1_1	ARHGAP45	rho GTPase-activating protein 45 isoform 5	0.084569	0.814642	0.07	0.561	0.211	0.158	0.739	0.261	0.849	0.151	0.1	0.9	0.862	0.138	0.096	0.494	0.301	0.108	0.844	0.156	0.04	0.84	0.12	0.071	0.929	0.042	0.212	0.678	0.051	0	0.017	1	0.913	0.087	0.121	0.485	0.303	0.091	0.048	0.952	0.037	0.1	0.037	0.263	0.45	0.113	0.396
lcl|NM_001321538.3_cds_NP_001308467.1_1	TOGARAM2	TOG array regulator of axonemal microtubules protein 2 isoform 2	0.104416	0.979708	0.134	0.512	0.159	0.195	0.733	0.267	0.65	0.35	0.206	0.794	0.556	0.444	0.182	0.379	0.333	0.106	0.882	0.118	0.03	0.848	0.121	0.148	0.852	0.023	0.256	0.459	0.09	0.03	0.143	1	0.742	0.258	0.169	0.338	0.127	0.366	0.104	0.896	0.155	0.324	0.056	0.155	0.239	0.07	0.263
lcl|NM_001345961.2_cds_NP_001332890.1_1	ST8SIA6	alpha-2,8-sialyltransferase 8F isoform 2	0.150081	1.47162	0.636	0.364	0	0	0	1	0.5	0.5	0.75	0.25	0.444	0.556	0.5	0.143	0.143	0.214	0.286	0.714	0.308	0.385	0.308	0.704	0.296	0.167	0.167	0.375	0.167	0.042	0.083	1	0.455	0.545	0.385	0.308	0	0.308	0.429	0.571	0.4	0.4	0	0.2	0	0	0.294
lcl|NM_001347425.2_cds_NP_001334354.2_1	A2M	alpha-2-macroglobulin isoform c	0.0898818	0.845625	0.261	0.375	0.045	0.318	0.435	0.565	0.458	0.542	0.532	0.468	0.589	0.411	0.341	0.282	0.224	0.153	0.459	0.541	0.161	0.518	0.321	0.364	0.636	0.123	0.238	0.311	0.148	0.066	0.115	1	0.466	0.534	0.324	0.282	0	0.394	0.294	0.706	0.167	0.238	0.19	0.167	0.095	0.143	0.194
lcl|NM_001347684.2_cds_NP_001334613.1_1	UPK3B	uroplakin-3b isoform d precursor	0.125079	1.18831	0.05	0.65	0.15	0.15	0.5	0.5	0.75	0.25	0.111	0.889	1	0	0.12	0.6	0.28	0	0.875	0.125	0.111	0.667	0.222	0	1	0.077	0.308	0.513	0.026	0	0.077	1	0.75	0.25	0.125	0.531	0.219	0.125	0.091	0.909	0.077	0.231	0.077	0.231	0.385	0	0.417
lcl|NM_001348355.2_cds_NP_001335284.1_1	MYO1F	unconventional myosin-If isoform 2	0.0870341	0.832652	0.083	0.683	0.117	0.117	0.538	0.462	0.786	0.214	0.182	0.818	0.811	0.189	0.13	0.533	0.261	0.076	0.895	0.105	0.019	0.833	0.148	0.147	0.853	0.022	0.283	0.533	0.098	0	0.065	1	0.792	0.208	0.105	0.596	0.123	0.175	0.153	0.847	0.067	0.157	0.135	0.281	0.292	0.067	0.484
lcl|NM_001348756.2_cds_NP_001335685.1_1	SNTN	sentan isoform 1	0.152385	1.43656	0.25	0.333	0	0.417	0.8	0.2	0.3	0.7	0.583	0.417	0.625	0.375	0.4	0.2	0	0.4	0.75	0.25	0.154	0.385	0.462	0.75	0.25	0.095	0.19	0.381	0.143	0.048	0.143	1	0.143	0.857	0.333	0.333	0	0.333	0.714	0.286	0.444	0.444	0	0	0.111	0	0.071
lcl|NM_001350901.2_cds_NP_001337830.1_1	GSAP	gamma-secretase-activating protein isoform g	0.12764	1.23721	0.296	0.185	0.185	0.333	0.421	0.579	0.478	0.522	0.667	0.333	0.321	0.679	0.44	0.16	0.24	0.16	0.516	0.484	0.132	0.263	0.605	0.548	0.452	0.057	0.182	0.318	0.17	0.148	0.125	1	0.526	0.474	0.182	0.091	0.091	0.636	0.238	0.762	0.333	0.333	0.095	0	0.19	0.048	0.13
lcl|NM_001353179.1_cds_NP_001340108.1_1	OVCH1	ovochymase-1 precursor	0.0998681	0.955871	0.352	0.296	0.019	0.333	0.22	0.78	0.455	0.545	0.625	0.375	0.341	0.659	0.419	0.183	0.151	0.247	0.5	0.5	0.246	0.304	0.449	0.492	0.508	0.155	0.097	0.282	0.146	0.146	0.175	1	0.459	0.541	0.426	0.206	0.044	0.324	0.5	0.5	0.638	0.149	0.043	0.043	0.064	0.064	0.142
lcl|NM_001354840.2_cds_NP_001341769.1_1	CXCL8	interleukin-8 isoform 2 precursor	0.13706	1.31164	0.333	0.333	0	0.333	0.4	0.6	0.5	0.5	0.625	0.375	0.5	0.5	0.667	0	0	0.333	1	0	0.167	0.167	0.667	0.4	0.6	0	0.167	0.417	0.167	0	0.25	1	1	0	0.4	0.4	0	0.2	0	1	0.5	0.5	0	0	0	0	0
lcl|NM_001355479.1_cds_NP_001342408.1_1	GGTLC3	putative glutathione hydrolase light chain 3	0.135122	1.23089	0.308	0.308	0	0.385	1	0	0.889	0.111	0.2	0.8	0.8	0.2	0.056	0.556	0.333	0.056	0.857	0.143	0	0.923	0.077	0.167	0.833	0	0.385	0.462	0.077	0	0.077	1	0.556	0.444	0.143	0.357	0.357	0.143	0.1	0.9	0.125	0.25	0	0.125	0.5	0	0.059
lcl|NM_001363744.1_cds_NP_001350673.1_1	MSR1	macrophage scavenger receptor types I and II isoform 4	0.139187	1.34793	0.429	0.238	0	0.333	0.444	0.556	0.316	0.684	0.684	0.316	0.235	0.765	0.457	0.109	0.152	0.283	0.538	0.462	0.31	0.345	0.345	0.741	0.259	0.023	0.295	0.205	0.159	0.136	0.182	1	0.269	0.731	0.417	0.083	0.125	0.375	0.577	0.423	0.35	0.15	0.2	0.15	0.1	0.05	0.211
lcl|NM_001365487.2_cds_NP_001352416.1_1	ACOXL	acyl-coenzyme A oxidase-like protein isoform 2	0.166113	1.59723	0.241	0.31	0.103	0.345	0.4	0.6	0.5	0.5	0.417	0.583	0.231	0.769	0.36	0.04	0.28	0.32	0.333	0.667	0.368	0.316	0.316	0.231	0.769	0.043	0.217	0.348	0.13	0.13	0.13	1	0.417	0.583	0.333	0.167	0.083	0.417	0.167	0.833	0.412	0.294	0.059	0.059	0.118	0.059	0.375
lcl|NM_001365666.1_cds_NP_001352595.1_1	PRRT1B	proline rich transmembrane protein 1B	0.106811	1.01722	0.128	0.489	0.319	0.064	0.5	0.5	0.9	0.1	0	1	1	0	0.107	0.393	0.393	0.107	1	0	0	1	0	0.167	0.833	0	0.478	0.478	0.043	0	0	1	0	1	0.062	0.542	0.375	0.021	0	1	0	0.222	0	0.333	0.333	0.111	0.4
lcl|NM_001366028.2_cds_NP_001352957.1_1	DNAH12	dynein heavy chain 12, axonemal isoform 4	0.0389185	0.373364	0.336	0.202	0.027	0.435	0.371	0.629	0.374	0.626	0.69	0.31	0.238	0.762	0.468	0.16	0.096	0.277	0.3	0.7	0.279	0.191	0.531	0.623	0.377	0.105	0.096	0.172	0.225	0.232	0.17	1	0.328	0.672	0.424	0.152	0.027	0.397	0.456	0.544	0.383	0.094	0.178	0.106	0.094	0.144	0.103
lcl|NM_001366322.1_cds_NP_001353251.1_1	SLC22A31	putative solute carrier family 22 member 31	0.12383	1.16994	0.208	0.5	0.062	0.229	0.333	0.667	0.875	0.125	0.077	0.923	0.81	0.19	0.133	0.444	0.356	0.067	0.875	0.125	0	1	0	0	1	0.011	0.14	0.688	0.086	0	0.075	1	1	0	0.111	0.593	0.111	0.185	0.188	0.812	0.061	0.121	0.091	0.455	0.212	0.061	0.286
lcl|NM_001366920.1_cds_NP_001353849.1_1	CIBAR2	protein FAM92B isoform 2	0.129699	1.2434	0.125	0.625	0.083	0.167	0.5	0.5	0.706	0.294	0.115	0.885	0.538	0.462	0.3	0.2	0.5	0	0	1	0.125	0.75	0.125	0.391	0.609	0.036	0.214	0.679	0.071	0	0	1	0.778	0.222	0.2	0.7	0	0.1	0.154	0.846	0.227	0.409	0	0.091	0.273	0	0.35
lcl|NM_001369216.1_cds_NP_001356145.1_1	SMIM41	small integral membrane protein 41	0.0905661	0.870344	0	0.385	0.538	0.077	0.667	0.333	1	0	0	1	1	0	0.083	0.75	0.167	0	0	0	0	0	0	0	0	0	0.286	0.643	0.071	0	0	1	1	0	0	0.429	0.571	0	0	1	0	0	0	1	0	0	0.2
lcl|NM_001370182.1_cds_NP_001357111.1_1	LOC102724488	synaptotagmin-15 isoform 1	0.117541	1.10856	0.114	0.486	0.171	0.229	0.9	0.1	0.7	0.3	0.069	0.931	0.647	0.353	0.079	0.526	0.395	0	0.867	0.133	0	0.857	0.143	0.174	0.826	0.021	0.25	0.646	0.042	0	0.042	1	0.778	0.222	0.234	0.447	0.106	0.213	0.15	0.85	0.121	0.121	0.061	0.364	0.273	0.061	0.421
lcl|NM_001370184.1_cds_NP_001357113.1_1	LOC102724488	synaptotagmin-15 isoform 3	0.123857	1.13832	0.16	0.48	0.08	0.28	0.75	0.25	0.7	0.3	0.069	0.931	0.706	0.294	0.077	0.538	0.385	0	0.8	0.2	0	0.8	0.2	0.182	0.818	0.019	0.222	0.667	0.037	0	0.056	1	0.778	0.222	0.286	0.5	0.107	0.107	0.2	0.8	0.148	0.259	0.074	0.222	0.222	0.074	0.433
lcl|NM_001371193.1_cds_NP_001358122.1_1	CCL24	C-C motif chemokine 24 precursor	0.120247	1.02839	0.375	0.375	0	0.25	0.667	0.333	1	0	0	1	0.8	0.2	0.125	0.75	0	0.125	1	0	0.167	0.667	0.167	0	1	0	0.143	0.571	0.286	0	0	1	1	0	0	0.375	0	0.625	0.125	0.875	0.286	0.571	0.143	0	0	0	0.444
lcl|NM_001371254.1_cds_NP_001358183.1_1	ACOXL	acyl-coenzyme A oxidase-like protein isoform 3	0.137988	1.31909	0.229	0.438	0.083	0.25	0.455	0.545	0.5	0.5	0.438	0.562	0.286	0.714	0.316	0.105	0.316	0.263	0.571	0.429	0.304	0.348	0.348	0.281	0.719	0.033	0.15	0.483	0.067	0.117	0.15	1	0.5	0.5	0.25	0.312	0.062	0.375	0.222	0.778	0.265	0.265	0.088	0.118	0.206	0.059	0.407
lcl|NM_001371421.1_cds_NP_001358350.1_1	IL18R1	interleukin-18 receptor 1 isoform 6	0.143545	1.40627	0.333	0.2	0	0.467	0.75	0.25	0.312	0.688	0.676	0.324	0.5	0.5	0.579	0.158	0.158	0.105	0.308	0.692	0.346	0.308	0.346	0.667	0.333	0.222	0.044	0.089	0.222	0.156	0.267	1	0.391	0.609	0.333	0.133	0.133	0.4	0.5	0.5	0.6	0.25	0.1	0.05	0	0	0.182
lcl|NM_001372106.1_cds_NP_001359035.1_1	DNAH10	dynein heavy chain 10, axonemal isoform 3	0.0359696	0.346902	0.233	0.388	0.112	0.267	0.614	0.386	0.562	0.438	0.436	0.564	0.502	0.498	0.278	0.318	0.251	0.152	0.614	0.386	0.169	0.458	0.373	0.448	0.552	0.058	0.175	0.445	0.13	0.066	0.125	1	0.542	0.458	0.261	0.312	0.108	0.318	0.27	0.73	0.206	0.249	0.117	0.16	0.218	0.051	0.198
lcl|NM_001375654.1_cds_NP_001362583.1_1	RP1	oxygen-regulated protein 1 isoform 2	0.0899196	0.867299	0.485	0.206	0.059	0.25	0.304	0.696	0.31	0.69	0.54	0.46	0.333	0.667	0.504	0.191	0.165	0.139	0.306	0.694	0.302	0.291	0.407	0.489	0.511	0.104	0.139	0.27	0.287	0.061	0.139	1	0.444	0.556	0.29	0.304	0.043	0.362	0.446	0.554	0.303	0.263	0.092	0.132	0.105	0.105	0.228
lcl|NM_001378030.1_cds_NP_001364959.1_1	CCDC78	coiled-coil domain-containing protein 78 isoform 3	0.120655	1.12811	0.368	0.386	0.088	0.158	0.75	0.25	0.684	0.316	0.214	0.786	0.833	0.167	0.219	0.375	0.312	0.094	0.696	0.304	0.1	0.7	0.2	0.222	0.778	0.109	0.127	0.673	0.036	0	0.055	1	0.429	0.571	0.345	0.414	0	0.241	0.143	0.857	0.071	0.262	0.095	0.095	0.405	0.071	0.5
lcl|NM_001378031.1_cds_NP_001364960.1_1	CCDC78	coiled-coil domain-containing protein 78 isoform 4	0.117574	1.07666	0.365	0.385	0.096	0.154	0.75	0.25	0.6	0.4	0.205	0.795	1	0	0.208	0.458	0.25	0.083	0.714	0.286	0	0.875	0.125	0.188	0.812	0.122	0.122	0.694	0.041	0	0.02	1	0.333	0.667	0.35	0.4	0	0.25	0.132	0.868	0.05	0.275	0.1	0.1	0.4	0.075	0.556
lcl|NM_001378902.1_cds_NP_001365831.1_1	ROS1	proto-oncogene tyrosine-protein kinase ROS isoform 3 precursor	0.0579391	0.539661	0.344	0.232	0.04	0.384	0.36	0.64	0.418	0.582	0.664	0.336	0.292	0.708	0.45	0.207	0.157	0.186	0.531	0.469	0.235	0.289	0.477	0.504	0.496	0.087	0.117	0.278	0.204	0.183	0.13	1	0.333	0.667	0.425	0.173	0.031	0.37	0.505	0.495	0.465	0.233	0.081	0.047	0.128	0.047	0.135
lcl|NM_001424.6_cds_NP_001415.1_1	EMP2	epithelial membrane protein 2 precursor	0.139869	1.30134	0.125	0.562	0.25	0.062	0.571	0.429	0.714	0.286	0.4	0.6	0.714	0.286	0.4	0.6	0	0	1	0	0.111	0.611	0.278	0.6	0.4	0.118	0.235	0.412	0.118	0	0.118	1	0.5	0.5	0	1	0	0	0.167	0.833	0.25	0.375	0	0.25	0	0.125	0.3
lcl|NM_001430.5_cds_NP_001421.2_1	EPAS1	endothelial PAS domain-containing protein 1	0.110559	1.05244	0.17	0.604	0.075	0.151	0.727	0.273	0.727	0.273	0.22	0.78	0.763	0.237	0.14	0.36	0.36	0.14	0.556	0.444	0	0.778	0.222	0.18	0.82	0.057	0.184	0.586	0.023	0.011	0.138	1	0.727	0.273	0.243	0.457	0.114	0.186	0.125	0.875	0.171	0.257	0.114	0.114	0.286	0.057	0.379
lcl|NM_001460.5_cds_NP_001451.2_1	FMO2	dimethylaniline monooxygenase	0.137657	1.32615	0.154	0.269	0.077	0.5	0.583	0.417	0.32	0.68	0.469	0.531	0.541	0.459	0.424	0.364	0.091	0.121	0.4	0.6	0.129	0.387	0.484	0.595	0.405	0.122	0.204	0.367	0.184	0.02	0.102	1	0.381	0.619	0.458	0.25	0	0.292	0.478	0.522	0.308	0.192	0.077	0.154	0.115	0.154	0.178
lcl|NM_001544.5_cds_NP_001535.1_1	ICAM4	intercellular adhesion molecule 4 isoform 1 precursor	0.144078	1.41364	0.074	0.296	0.333	0.296	0.875	0.125	0.75	0.25	0.2	0.8	0.667	0.333	0.25	0.3	0.3	0.15	0.8	0.2	0	0.714	0.286	0.3	0.7	0.057	0.343	0.371	0.029	0.029	0.171	1	0.5	0.5	0	0.455	0.409	0.136	0.2	0.8	0.056	0.222	0	0.5	0.222	0	0.481
lcl|NM_001565.4_cds_NP_001556.2_1	CXCL10	C-X-C motif chemokine 10 precursor	0.140297	1.2695	0.4	0.4	0	0.2	0.5	0.5	0	0	0.667	0.333	0	1	0.333	0.333	0	0.333	0	0	0	0.364	0.636	0.4	0.6	0.1	0.1	0.4	0.2	0.2	0	1	0	1	0.429	0	0	0.571	1	0	0.429	0.286	0	0.143	0	0.143	0.3
lcl|NM_001608.4_cds_NP_001599.1_1	ACADL	long-chain specific acyl-CoA dehydrogenase, mitochondrial precursor	0.144216	1.40399	0.317	0.171	0.122	0.39	0.143	0.857	0.467	0.533	0.629	0.371	0.353	0.647	0.487	0.179	0.103	0.231	0.235	0.765	0.194	0.161	0.645	0.733	0.267	0.176	0.118	0.235	0.176	0.235	0.059	1	0.231	0.769	0.429	0.214	0.071	0.286	0.375	0.625	0.19	0.19	0.238	0.143	0.095	0.143	0.069
lcl|NM_001650.7_cds_NP_001641.1_1	AQP4	aquaporin-4 isoform M1	0.152861	1.44054	0.357	0.357	0.036	0.25	0.5	0.5	0.636	0.364	0.357	0.643	0.353	0.647	0.529	0.147	0.118	0.206	0.143	0.857	0.154	0.577	0.269	0.6	0.4	0.038	0.269	0.269	0.154	0.115	0.154	1	0.556	0.444	0.083	0.333	0.083	0.5	0.5	0.5	0.182	0.273	0.091	0	0.273	0.182	0.381
lcl|NM_002000.4_cds_NP_001991.1_1	FCAR	immunoglobulin alpha Fc receptor isoform a precursor	0.159684	1.50424	0.45	0.4	0	0.15	0.625	0.375	0.538	0.462	0.5	0.5	0.545	0.455	0.294	0.235	0.294	0.176	0.875	0.125	0.312	0.375	0.312	0.5	0.5	0	0.219	0.438	0.094	0	0.25	1	0.545	0.455	0.294	0.353	0.118	0.235	0.25	0.75	0.2	0.333	0.133	0.133	0.133	0.067	0.208
lcl|NM_002090.3_cds_NP_002081.2_1	CXCL3	C-X-C motif chemokine 3 precursor	0.135088	1.31146	0.214	0.571	0.143	0.071	0.75	0.25	0	0	1	0	0	0	0.6	0	0.4	0	1	0	0.333	0.5	0.167	0.286	0.714	0	0.438	0.5	0	0	0.062	1	0.571	0.429	0	1	0	0	0.333	0.667	0	0.167	0	0.333	0.5	0	0.375
lcl|NM_002091.5_cds_NP_002082.2_1	GRP	gastrin-releasing peptide isoform 1 preproprotein	0.15682	1.44897	0.2	0.1	0.5	0.2	1	0	0	1	0.4	0.6	1	0	0.118	0.294	0.353	0.235	1	0	0.5	0.5	0	0.444	0.556	0	0.222	0.667	0	0.056	0.056	1	0.75	0.25	0.182	0.273	0.273	0.273	0.3	0.7	0.308	0.231	0.077	0.154	0.077	0.154	0.308
lcl|NM_002118.5_cds_NP_002109.2_1	HLA-DMB	HLA class II histocompatibility antigen, DM beta chain precursor	0.157537	1.44833	0.2	0.467	0.133	0.2	0.625	0.375	0.444	0.556	0.444	0.556	0.778	0.222	0.19	0.286	0.429	0.095	0.778	0.222	0	0.875	0.125	0.222	0.778	0	0.161	0.516	0.161	0.065	0.097	1	0.417	0.583	0.263	0.263	0.053	0.421	0.222	0.778	0.111	0.333	0	0.222	0.333	0	0.238
lcl|NM_002124.3_cds_NP_002115.2_1	HLA-DRB1	major histocompatibility complex, class II, DR beta 1 precursor precursor	0.129594	1.23863	0.182	0.182	0.364	0.273	0.667	0.333	1	0	0.294	0.706	0.938	0.062	0.304	0.261	0.391	0.043	0.833	0.167	0	0.75	0.25	0.125	0.875	0	0.148	0.741	0.074	0	0.037	1	0.625	0.375	0.385	0.077	0	0.538	0.133	0.867	0.167	0.167	0.167	0.056	0.389	0.056	0.409
lcl|NM_002125.4_cds_NP_002116.2_1	HLA-DRB5	major histocompatibility complex, class II, DR beta 5 precursor	0.134758	1.27698	0.333	0.167	0.167	0.333	0.6	0.4	0.909	0.091	0.333	0.667	0.929	0.071	0.261	0.174	0.435	0.13	0.875	0.125	0	0.5	0.5	0.111	0.889	0.037	0.185	0.593	0.074	0	0.111	1	0.667	0.333	0.455	0	0	0.545	0.143	0.857	0.167	0.167	0.167	0.111	0.333	0.056	0.526
lcl|NM_002185.5_cds_NP_002176.2_1	IL7R	interleukin-7 receptor subunit alpha precursor	0.141832	1.36588	0.294	0.235	0	0.471	0.538	0.462	0.44	0.56	0.645	0.355	0.435	0.565	0.435	0.174	0.261	0.13	0.444	0.556	0.208	0.417	0.375	0.448	0.552	0.135	0.154	0.327	0.115	0.135	0.135	1	0.273	0.727	0.333	0.208	0.042	0.417	0.478	0.522	0.357	0.429	0.071	0.071	0.071	0	0.217
lcl|NM_002208.5_cds_NP_002199.3_1	ITGAE	integrin alpha-E precursor	0.0970051	0.926384	0.169	0.472	0.146	0.213	0.5	0.5	0.533	0.467	0.349	0.651	0.596	0.404	0.244	0.36	0.221	0.174	0.559	0.441	0.115	0.635	0.25	0.37	0.63	0.031	0.276	0.433	0.11	0.039	0.11	1	0.659	0.341	0.234	0.511	0.043	0.213	0.161	0.839	0.21	0.258	0.032	0.194	0.242	0.065	0.344
lcl|NM_002344.6_cds_NP_002335.2_1	LTK	leukocyte tyrosine kinase receptor isoform 1 precursor	0.103126	1.00107	0.101	0.536	0.217	0.145	0.8	0.2	0.63	0.37	0.204	0.796	0.667	0.333	0.133	0.442	0.342	0.083	0.765	0.235	0.083	0.625	0.292	0.263	0.737	0.02	0.235	0.598	0.078	0	0.069	1	0.647	0.353	0.222	0.306	0.208	0.264	0.103	0.897	0.113	0.208	0.113	0.226	0.321	0.019	0.306
lcl|NM_002379.3_cds_NP_002370.1_1	MATN1	cartilage matrix protein precursor	0.114097	1.07819	0.071	0.619	0.048	0.262	0.786	0.214	0.793	0.207	0.179	0.821	0.773	0.227	0.056	0.5	0.222	0.222	0.571	0.429	0.091	0.727	0.182	0.182	0.818	0	0.233	0.744	0	0	0.023	1	0.455	0.545	0.067	0.467	0.2	0.267	0.043	0.957	0.038	0.308	0	0.154	0.423	0.077	0.375
lcl|NM_002381.5_cds_NP_002372.1_1	MATN3	matrilin-3 precursor	0.14218	1.39296	0.222	0.378	0.133	0.267	0.25	0.75	0.633	0.367	0.367	0.633	0.8	0.2	0.189	0.324	0.27	0.216	0.562	0.438	0.15	0.45	0.4	0.478	0.522	0.075	0.175	0.375	0.175	0.025	0.175	1	0.333	0.667	0.038	0.577	0.192	0.192	0.333	0.667	0.194	0.129	0.129	0.258	0.194	0.097	0.194
lcl|NM_002427.4_cds_NP_002418.1_1	MMP13	collagenase 3 preproprotein	0.14058	1.3453	0.32	0.2	0.12	0.36	0.25	0.75	0.366	0.634	0.593	0.407	0.5	0.5	0.286	0.257	0.143	0.314	0.333	0.667	0.167	0.417	0.417	0.724	0.276	0.023	0.209	0.279	0.256	0.14	0.093	1	0.444	0.556	0.333	0.212	0.03	0.424	0.125	0.875	0.474	0.053	0.158	0.158	0.053	0.105	0.133
lcl|NM_002438.4_cds_NP_002429.1_1	MRC1	macrophage mannose receptor 1 precursor	0.0858657	0.835673	0.329	0.241	0.076	0.354	0.442	0.558	0.365	0.635	0.702	0.298	0.302	0.698	0.371	0.248	0.162	0.219	0.625	0.375	0.176	0.309	0.515	0.673	0.327	0.087	0.115	0.288	0.173	0.183	0.154	1	0.395	0.605	0.328	0.179	0.134	0.358	0.54	0.46	0.333	0.222	0.259	0.037	0.093	0.056	0.189
lcl|NM_002445.4_cds_NP_002436.1_1	MSR1	macrophage scavenger receptor types I and II isoform type 2	0.141045	1.34024	0.5	0.188	0	0.312	1	0	0.294	0.706	0.667	0.333	0.308	0.692	0.531	0.094	0.125	0.25	0.333	0.667	0.318	0.318	0.364	0.727	0.273	0.027	0.297	0.189	0.162	0.135	0.189	1	0.25	0.75	0.333	0.143	0.143	0.381	0.591	0.409	0.429	0.143	0.214	0.071	0.071	0.071	0.179
lcl|NM_002456.6_cds_NP_002447.4_1	MUC1	mucin-1 isoform 1 precursor	0.154913	1.48967	0.263	0.421	0.105	0.211	0.333	0.667	0.556	0.444	0.455	0.545	0.533	0.467	0.1	0.25	0.3	0.35	0.5	0.5	0	0.4	0.6	0.286	0.714	0	0.222	0.556	0.037	0	0.185	1	0.455	0.545	0.375	0.312	0.062	0.25	0.231	0.769	0.2	0.1	0.3	0.2	0.1	0.1	0.265
lcl|NM_002483.7_cds_NP_002474.4_1	CEACAM6	carcinoembryonic antigen-related cell adhesion molecule 6 preproprotein	0.149102	1.41433	0.28	0.48	0.04	0.2	0.6	0.4	0.375	0.625	0.5	0.5	0.75	0.25	0.409	0.273	0.182	0.136	0.4	0.6	0.294	0.412	0.294	0.222	0.778	0.156	0.344	0.375	0.094	0	0.031	1	0.533	0.467	0.241	0.517	0.103	0.138	0.375	0.625	0.2	0.4	0.1	0.1	0	0.2	0.161
lcl|NM_002543.4_cds_NP_002534.1_1	OLR1	oxidized low-density lipoprotein receptor 1 isoform 1	0.163367	1.55441	0.318	0.136	0.091	0.455	0.444	0.556	0.6	0.4	0.579	0.421	0.333	0.667	0.385	0.231	0.154	0.231	0.8	0.2	0.273	0.364	0.364	0.4	0.6	0.182	0.121	0.303	0.152	0.121	0.121	1	0.538	0.462	0.3	0.2	0.1	0.4	0.478	0.522	0.333	0.111	0.222	0	0.333	0	0.125
lcl|NM_002891.5_cds_NP_002882.3_1	RASGRF1	ras-specific guanine nucleotide-releasing factor 1 isoform 1	0.0916523	0.879459	0.177	0.582	0.101	0.139	0.619	0.381	0.672	0.328	0.279	0.721	0.633	0.367	0.174	0.457	0.283	0.087	0.677	0.323	0.096	0.723	0.181	0.287	0.713	0.03	0.254	0.575	0.037	0.045	0.06	1	0.655	0.345	0.218	0.418	0.164	0.2	0.245	0.755	0.105	0.25	0.053	0.329	0.224	0.039	0.289
lcl|NM_002944.3_cds_NP_002935.2_1	ROS1	proto-oncogene tyrosine-protein kinase ROS isoform 1 precursor	0.0577018	0.536018	0.352	0.224	0.04	0.384	0.367	0.633	0.418	0.582	0.674	0.326	0.29	0.71	0.447	0.213	0.156	0.184	0.531	0.469	0.229	0.294	0.477	0.504	0.496	0.086	0.12	0.279	0.202	0.185	0.129	1	0.333	0.667	0.425	0.173	0.031	0.37	0.505	0.495	0.465	0.233	0.081	0.047	0.128	0.047	0.13
lcl|NM_002976.4_cds_NP_002967.2_1	SCN7A	sodium channel protein type 7 subunit alpha	0.072097	0.684653	0.364	0.156	0.026	0.455	0.35	0.65	0.356	0.644	0.753	0.247	0.367	0.633	0.419	0.221	0.14	0.221	0.259	0.741	0.268	0.235	0.497	0.569	0.431	0.073	0.13	0.212	0.264	0.135	0.187	1	0.405	0.595	0.419	0.161	0	0.419	0.615	0.385	0.467	0.217	0.1	0.083	0.083	0.05	0.138
lcl|NM_002984.4_cds_NP_002975.1_1	CCL4	C-C motif chemokine 4 precursor	0.172046	1.57973	0.125	0.25	0.25	0.375	0.833	0.167	0.5	0.5	0.5	0.5	0.5	0.5	0	1	0	0	0	0	0	0	0	0.25	0.75	0.1	0.5	0.3	0.1	0	0	1	1	0	0.429	0.286	0	0.286	0.5	0.5	0.333	0.333	0	0.333	0	0	0.273
lcl|NM_002988.4_cds_NP_002979.1_1	CCL18	C-C motif chemokine 18 precursor	0.121727	1.0365	0.286	0.429	0	0.286	0.714	0.286	1	0	0.5	0.5	1	0	0	0.5	0	0.5	0	0	0.2	0.6	0.2	0.222	0.778	0.091	0.545	0.182	0.182	0	0	1	0.333	0.667	0.4	0.6	0	0	0.333	0.667	0.5	0	0	0	0.5	0	0.4
lcl|NM_002994.5_cds_NP_002985.1_1	CXCL5	C-X-C motif chemokine 5 precursor	0.17081	1.60121	0	0.545	0.182	0.273	0.6	0.4	0.5	0.5	0.8	0.2	0.5	0.5	0.25	0.125	0.25	0.375	0	1	0.167	0.5	0.333	0.375	0.625	0.056	0.056	0.556	0.056	0.056	0.222	1	0.75	0.25	0.333	0.333	0	0.333	0.333	0.667	0.25	0	0	0.25	0	0.5	0.4
lcl|NM_003018.4_cds_NP_003009.2_1	SFTPC	pulmonary surfactant-associated protein C isoform 1 precursor	0.138607	1.27086	0.278	0.5	0.056	0.167	0.833	0.167	0.6	0.4	0.182	0.818	0.75	0.25	0.125	0.625	0.188	0.062	1	0	0.091	0.636	0.273	0.5	0.5	0	0.273	0.591	0.136	0	0	1	1	0	0.2	0.333	0.333	0.133	0.125	0.875	0.167	0	0.333	0.333	0.167	0	0.4
lcl|NM_003019.5_cds_NP_003010.4_1	SFTPD	pulmonary surfactant-associated protein D precursor	0.132746	1.23707	0.333	0.25	0	0.417	0.5	0.5	0.538	0.462	0.32	0.68	0.8	0.2	0.356	0.247	0.247	0.151	1	0	0.25	0.25	0.5	0.304	0.696	0	0.25	0.5	0.071	0.036	0.143	1	0.5	0.5	0.41	0.256	0.026	0.308	0.25	0.75	0.286	0.214	0.071	0.143	0.143	0.143	0.091
lcl|NM_003123.6_cds_NP_003114.1_1	SPN	leukosialin precursor	0.126439	1.21906	0.219	0.438	0.062	0.281	0	0	0.692	0.308	0.174	0.826	0.75	0.25	0.25	0.25	0.432	0.068	0.333	0.667	0.571	0.286	0.143	0.273	0.727	0.086	0.2	0.486	0.171	0.029	0.029	1	0.857	0.143	0.231	0.385	0	0.385	0	1	0.188	0.062	0.062	0.125	0.438	0.125	0.224
lcl|NM_003206.4_cds_NP_003197.2_1	TCF21	transcription factor 21	0.124398	1.22096	0	0.5	0.417	0.083	0.333	0.667	0.75	0.25	0.214	0.786	0.333	0.667	0.083	0.417	0.5	0	1	0	0	0.667	0.333	0.267	0.733	0	0.222	0.5	0.056	0.056	0.167	1	0.889	0.111	0	0.889	0.111	0	0.167	0.833	0.083	0.333	0.167	0.333	0.083	0	0.45
lcl|NM_003278.3_cds_NP_003269.2_1	CLEC3B	tetranectin isoform 1precursor	0.0934117	0.872084	0	0.765	0.235	0	1	0	0.667	0.333	0	1	0.714	0.286	0	0.733	0.267	0	1	0	0	0.857	0.143	0.125	0.875	0	0.364	0.636	0	0	0	1	0.875	0.125	0.333	0.5	0	0.167	0.083	0.917	0	0	0	0.833	0	0.167	0.429
lcl|NM_003357.5_cds_NP_003348.1_1	SCGB1A1	uteroglobin precursor	0.133102	1.21478	0.222	0.222	0	0.556	0.75	0.25	0.75	0.25	0.571	0.429	0.5	0.5	0	0	1	0	0	0	0.2	0.6	0.2	0.333	0.667	0	0.538	0.385	0.077	0	0	1	0	1	0	0.6	0.2	0.2	0.6	0.4	0.333	0.333	0	0	0	0.333	0.5
lcl|NM_003391.3_cds_NP_003382.1_1	WNT2	protein Wnt-2 precursor	0.142689	1.37605	0.172	0.552	0	0.276	0.542	0.458	0.5	0.5	0.5	0.5	0.385	0.615	0.172	0.483	0.172	0.172	0.8	0.2	0	0.667	0.333	0.318	0.682	0.042	0.375	0.417	0.083	0	0.083	1	0.625	0.375	0.556	0.222	0	0.222	0.182	0.818	0.138	0.379	0.103	0.138	0.172	0.069	0.346
lcl|NM_003541.3_cds_NP_003532.1_1	H4C12	histone H4	0.111446	1.09526	0	0.571	0.143	0.286	0	0	0.667	0.333	0	1	1	0	0	0.647	0.118	0.235	1	0	0	1	0	0.273	0.727	0	0.375	0.375	0.25	0	0	1	0.5	0.5	0	0	1	0	0	1	0	0	0	0.786	0.143	0.071	0
lcl|NM_003665.4_cds_NP_003656.2_1	FCN3	ficolin-3 isoform 1 precursor	0.148458	1.40238	0.3	0.5	0.05	0.15	0.556	0.444	0.538	0.462	0.333	0.667	0.545	0.455	0.184	0.342	0.211	0.263	0.9	0.1	0	0.333	0.667	0.286	0.714	0.057	0.257	0.486	0.114	0	0.086	1	0.583	0.417	0.391	0.391	0	0.217	0.2	0.8	0.1	0.25	0.1	0.25	0.2	0.1	0.304
lcl|NM_003823.4_cds_NP_003814.1_1	TNFRSF6B	tumor necrosis factor receptor superfamily member 6B precursor	0.129771	1.20401	0.129	0.452	0.258	0.161	0.81	0.19	1	0	0.053	0.947	0.8	0.2	0.087	0.522	0.261	0.13	0.875	0.125	0	0.75	0.25	0	1	0.029	0.2	0.686	0	0	0.086	1	0.833	0.167	0.276	0.31	0.31	0.103	0	1	0	0.161	0.032	0.355	0.29	0.161	0.471
lcl|NM_003855.5_cds_NP_003846.1_1	IL18R1	interleukin-18 receptor 1 isoform 1 precursor	0.130412	1.2667	0.389	0.167	0	0.444	0.467	0.533	0.333	0.667	0.681	0.319	0.478	0.522	0.591	0.136	0.182	0.091	0.316	0.684	0.333	0.273	0.394	0.732	0.268	0.172	0.034	0.121	0.224	0.155	0.293	1	0.387	0.613	0.35	0.2	0.1	0.35	0.5	0.5	0.63	0.222	0.074	0.037	0	0.037	0.22
lcl|NM_003856.4_cds_NP_003847.2_1	IL1RL1	interleukin-1 receptor-like 1 isoform 2 precursor	0.153417	1.48902	0.333	0.208	0.125	0.333	0.182	0.818	0.429	0.571	0.588	0.412	0.312	0.688	0.45	0.25	0.15	0.15	0.75	0.25	0.222	0.111	0.667	0.6	0.4	0.138	0.103	0.276	0.138	0.138	0.207	1	0.19	0.81	0.417	0.167	0	0.417	0.706	0.294	0.533	0.4	0	0	0	0.067	0.042
lcl|NM_003950.4_cds_NP_003941.2_1	F2RL3	proteinase-activated receptor 4 preproprotein	0.109342	1.00881	0.13	0.593	0.204	0.074	0.75	0.25	0.733	0.267	0.2	0.8	1	0	0.062	0.469	0.344	0.125	0.778	0.222	0	1	0	0	1	0	0.169	0.779	0.026	0	0.026	1	0.667	0.333	0.038	0.615	0.269	0.077	0.3	0.7	0	0.115	0.038	0.346	0.423	0.077	0.484
lcl|NM_003979.4_cds_NP_003970.1_1	GPRC5A	retinoic acid-induced protein 3	0.140608	1.3313	0	0.52	0.04	0.44	0.571	0.429	0.571	0.429	0.533	0.467	0.615	0.385	0.045	0.364	0.318	0.273	0.4	0.6	0	0.778	0.222	0.312	0.688	0.041	0.429	0.347	0.082	0	0.102	1	0.5	0.5	0.059	0.353	0.118	0.471	0.455	0.545	0.188	0.25	0.125	0.25	0.125	0.062	0.25
lcl|NM_004049.4_cds_NP_004040.1_1	BCL2A1	bcl-2-related protein A1 isoform 1	0.160119	1.56554	0.167	0.333	0.333	0.167	0.4	0.6	0.714	0.286	0.786	0.214	0.273	0.727	0.5	0.333	0	0.167	0	0	0.308	0.231	0.462	0.308	0.692	0.429	0.143	0.286	0.071	0	0.071	1	0.4	0.6	0.4	0	0.2	0.4	0.636	0.364	0.5	0.333	0.167	0	0	0	0.111
lcl|NM_004390.5_cds_NP_004381.2_1	CTSH	pro-cathepsin H isoform a preproprotein	0.136499	1.33282	0.103	0.621	0.103	0.172	0.917	0.083	0.7	0.3	0.375	0.625	0.438	0.562	0.241	0.207	0.276	0.276	0.8	0.2	0.143	0.857	0	0.435	0.565	0	0.273	0.591	0.045	0.045	0.045	1	0.667	0.333	0.125	0.375	0.062	0.438	0.231	0.769	0.143	0.286	0.143	0.143	0.143	0.143	0.174
lcl|NM_004469.5_cds_NP_004460.1_1	VEGFD	vascular endothelial growth factor D preproprotein	0.149442	1.44707	0.333	0.267	0.067	0.333	0.467	0.533	0.615	0.385	0.567	0.433	0.385	0.615	0.2	0.3	0.3	0.2	0.467	0.533	0.154	0.462	0.385	0.542	0.458	0.2	0.2	0.2	0.12	0.04	0.24	1	0.455	0.545	0.417	0.25	0	0.333	0.071	0.929	0.333	0.208	0.208	0.167	0.042	0.042	0.171
lcl|NM_004557.4_cds_NP_004548.3_1	NOTCH4	neurogenic locus notch homolog protein 4 preproprotein	0.073575	0.698181	0.177	0.475	0.076	0.272	0.593	0.407	0.622	0.378	0.302	0.698	0.74	0.26	0.267	0.356	0.279	0.097	0.766	0.234	0.3	0.4	0.3	0.424	0.576	0.08	0.262	0.497	0.102	0.011	0.048	1	0.717	0.283	0.245	0.377	0.086	0.291	0.192	0.808	0.112	0.153	0.102	0.265	0.255	0.112	0.25
lcl|NM_004591.3_cds_NP_004582.1_1	CCL20	C-C motif chemokine 20 isoform 1 precursor	0.130017	1.25637	0.429	0.143	0	0.429	0.571	0.429	1	0	1	0	0.25	0.75	0.25	0.75	0	0	0.667	0.333	0	0.5	0.5	0.6	0.4	0.071	0.357	0.214	0.143	0	0.214	1	0.4	0.6	0.5	0	0	0.5	0	1	0	0	0	0	0.333	0.667	0.167
lcl|NM_004621.6_cds_NP_004612.2_1	TRPC6	short transient receptor potential channel 6	0.108175	1.04455	0.314	0.286	0.057	0.343	0.867	0.133	0.442	0.558	0.699	0.301	0.549	0.451	0.354	0.25	0.167	0.229	0.421	0.579	0.276	0.138	0.586	0.619	0.381	0.067	0.202	0.26	0.231	0.135	0.106	1	0.34	0.66	0.382	0.206	0.176	0.235	0.243	0.757	0.267	0.244	0.067	0.111	0.244	0.067	0.2
lcl|NM_004624.4_cds_NP_004615.2_1	VIPR1	vasoactive intestinal polypeptide receptor 1 isoform 1 precursor	0.126863	1.21091	0.091	0.636	0.121	0.152	0.688	0.312	0.714	0.286	0.15	0.85	0.724	0.276	0.061	0.606	0.182	0.152	0.889	0.111	0.138	0.724	0.138	0.188	0.812	0.038	0.283	0.509	0.075	0	0.094	1	0.636	0.364	0.227	0.364	0.273	0.136	0.167	0.833	0	0.333	0.042	0.333	0.292	0	0.306
lcl|NM_004665.5_cds_NP_004656.2_1	VNN2	vascular non-inflammatory molecule 2 isoform 1 precursor	0.136817	1.31677	0.387	0.226	0.032	0.355	0.417	0.583	0.526	0.474	0.517	0.483	0.375	0.625	0.484	0.129	0.194	0.194	0.214	0.786	0.37	0.259	0.37	0.565	0.435	0.132	0.113	0.208	0.226	0.113	0.208	1	0.323	0.677	0.414	0.172	0.069	0.345	0.4	0.6	0.333	0.333	0.111	0	0.056	0.167	0.161
lcl|NM_004829.7_cds_NP_004820.2_1	NCR1	natural cytotoxicity triggering receptor 1 isoform a precursor	0.159647	1.51606	0.222	0.556	0.056	0.167	0.571	0.429	0.818	0.182	0.421	0.579	0.615	0.385	0.368	0.316	0.316	0	0.5	0.5	0	0.75	0.25	0.364	0.636	0.086	0.314	0.371	0.143	0.057	0.029	1	0.778	0.222	0.2	0.4	0.1	0.3	0.214	0.786	0.316	0.263	0.105	0.105	0.158	0.053	0.429
lcl|NM_004851.3_cds_NP_004842.1_1	NAPSA	napsin-A preproprotein	0.137901	1.31514	0.194	0.516	0.129	0.161	0.667	0.333	0.474	0.526	0.278	0.722	0.625	0.375	0.298	0.17	0.426	0.106	0.556	0.444	0.042	0.708	0.25	0.091	0.909	0.038	0.264	0.509	0.057	0.019	0.113	1	0.556	0.444	0.22	0.341	0.122	0.317	0.333	0.667	0.091	0.227	0.136	0.318	0.182	0.045	0.217
lcl|NM_004962.5_cds_NP_004953.1_1	GDF10	growth/differentiation factor 10 preproprotein	0.114687	1.10694	0.113	0.585	0.208	0.094	0.625	0.375	0.643	0.357	0.158	0.842	0.812	0.188	0.143	0.464	0.393	0	0.833	0.167	0.071	0.857	0.071	0.211	0.789	0.062	0.229	0.604	0.042	0	0.062	1	0.8	0.2	0.077	0.538	0.269	0.115	0.045	0.955	0.023	0.273	0.045	0.295	0.341	0.023	0.357
lcl|NM_005411.5_cds_NP_005402.3_1	SFTPA1	pulmonary surfactant-associated protein A1 isoform 1 precursor	0.148735	1.36524	0.294	0.529	0	0.176	0.333	0.667	0.583	0.417	0.167	0.833	0.667	0.333	0.316	0.289	0.211	0.184	0.5	0.5	0.1	0.6	0.3	0.286	0.714	0.056	0.333	0.5	0.056	0	0.056	1	0.5	0.5	0.296	0.148	0	0.556	0.25	0.75	0.231	0.385	0.154	0.154	0.077	0	0.333
lcl|NM_005434.5_cds_NP_005425.1_1	MALL	MAL-like protein isoform 1	0.138721	1.34876	0.067	0.8	0.067	0.067	0	0	1	0	0.333	0.667	0.667	0.333	0.333	0.167	0.5	0	0.6	0.4	0.182	0.455	0.364	1	0	0.045	0.227	0.5	0	0	0.227	1	0	1	0.111	0.556	0.222	0.111	1	0	1	0	0	0	0	0	0.267
lcl|NM_005585.5_cds_NP_005576.3_1	SMAD6	mothers against decapentaplegic homolog 6	0.101732	0.992507	0.071	0.548	0.286	0.095	0.933	0.067	0.885	0.115	0.219	0.781	0.857	0.143	0.052	0.741	0.172	0.034	1	0	0	1	0	0.167	0.833	0.02	0.265	0.653	0.02	0	0.041	1	1	0	0.061	0.51	0.347	0.082	0	1	0.039	0.059	0.098	0.451	0.333	0.02	0.378
lcl|NM_006030.4_cds_NP_006021.2_1	CACNA2D2	voltage-dependent calcium channel subunit alpha-2/delta-2 isoform b precursor	0.0939012	0.87911	0.157	0.542	0.096	0.205	0.714	0.286	0.667	0.333	0.129	0.871	0.755	0.245	0.13	0.623	0.159	0.087	0.9	0.1	0.05	0.725	0.225	0.137	0.863	0.075	0.2	0.6	0.058	0.017	0.05	1	0.783	0.217	0.101	0.42	0.261	0.217	0.102	0.898	0.123	0.215	0.062	0.277	0.246	0.077	0.377
lcl|NM_006043.2_cds_NP_006034.1_1	HS3ST2	heparan sulfate glucosamine 3-O-sulfotransferase 2	0.139486	1.38009	0	0.6	0.25	0.15	0.778	0.222	0.75	0.25	0.4	0.6	0.7	0.3	0.036	0.607	0.25	0.107	0.857	0.143	0.062	0.688	0.25	0.368	0.632	0.026	0.385	0.462	0.026	0	0.103	1	0.875	0.125	0.033	0.467	0.233	0.267	0.154	0.846	0.083	0.194	0.194	0.333	0.167	0.028	0.407
lcl|NM_006129.5_cds_NP_006120.1_1	BMP1	bone morphogenetic protein 1 isoform 3 precursor	0.0942507	0.88199	0.083	0.583	0.146	0.188	0.61	0.39	0.824	0.176	0.109	0.891	0.808	0.192	0.093	0.5	0.314	0.093	0.889	0.111	0	0.694	0.306	0.207	0.793	0.017	0.362	0.552	0.052	0	0.017	1	0.906	0.094	0.132	0.547	0.075	0.245	0.152	0.848	0.06	0.134	0.104	0.403	0.224	0.075	0.375
lcl|NM_006269.2_cds_NP_006260.1_1	RP1	oxygen-regulated protein 1 isoform 1	0.0636714	0.611891	0.379	0.155	0.029	0.437	0.36	0.64	0.352	0.648	0.628	0.372	0.263	0.737	0.362	0.181	0.095	0.362	0.327	0.673	0.325	0.219	0.456	0.645	0.355	0.123	0.099	0.117	0.199	0.24	0.222	1	0.295	0.705	0.36	0.21	0.04	0.39	0.56	0.44	0.402	0.304	0.065	0.098	0.076	0.054	0.117
lcl|NM_006424.3_cds_NP_006415.3_1	SLC34A2	sodium-dependent phosphate transport protein 2B isoform a	0.115831	1.12039	0.174	0.543	0.087	0.196	0.862	0.138	0.28	0.72	0.25	0.75	0.737	0.263	0.244	0.341	0.317	0.098	0.5	0.5	0.105	0.596	0.298	0.342	0.658	0.012	0.265	0.41	0.096	0.024	0.193	1	0.852	0.148	0.081	0.486	0.189	0.243	0.125	0.875	0.238	0.095	0.048	0.476	0.143	0	0.28
lcl|NM_006615.3_cds_NP_006606.1_1	CAPN9	calpain-9 isoform 1	0.121874	1.16652	0.176	0.49	0.059	0.275	0.667	0.333	0.6	0.4	0.254	0.746	0.667	0.333	0.175	0.35	0.3	0.175	0.706	0.294	0.079	0.579	0.342	0.465	0.535	0.074	0.162	0.529	0.132	0.029	0.074	1	0.52	0.48	0.29	0.29	0.129	0.29	0.226	0.774	0.282	0.154	0.077	0.103	0.333	0.051	0.372
lcl|NM_006774.5_cds_NP_006765.4_1	INMT	indolethylamine N-methyltransferase isoform 1	0.136793	1.25934	0.042	0.542	0.083	0.333	0.455	0.545	0.6	0.4	0.238	0.762	0.636	0.364	0.095	0.429	0.286	0.19	1	0	0	0.333	0.667	0.118	0.882	0.03	0.273	0.485	0.121	0	0.091	1	0.75	0.25	0.067	0.333	0.333	0.267	0.429	0.571	0	0.1	0.1	0.3	0.4	0.1	0.357
lcl|NM_007037.6_cds_NP_008968.4_1	ADAMTS8	A disintegrin and metalloproteinase with thrombospondin motifs 8 preproprotein	0.0984515	0.938983	0.127	0.535	0.183	0.155	0.675	0.325	0.756	0.244	0.186	0.814	0.821	0.179	0.144	0.389	0.4	0.067	0.917	0.083	0.042	0.792	0.167	0.314	0.686	0.032	0.215	0.667	0.032	0.011	0.043	1	0.571	0.429	0.097	0.556	0.208	0.139	0.024	0.976	0.098	0.176	0.078	0.275	0.294	0.078	0.429
lcl|NM_007191.5_cds_NP_009122.2_1	WIF1	wnt inhibitory factor 1 precursor	0.132125	1.27861	0.433	0.333	0.067	0.167	0.455	0.545	0.182	0.818	0.5	0.5	0.588	0.412	0.432	0.162	0.189	0.216	0.5	0.5	0.111	0.556	0.333	0.8	0.2	0.077	0.308	0.423	0.154	0	0.038	1	0.25	0.75	0.333	0.067	0.067	0.533	0.526	0.474	0.278	0.222	0.167	0.111	0.222	0	0.353
lcl|NM_007231.5_cds_NP_009162.1_1	SLC6A14	sodium- and chloride-dependent neutral and basic amino acid transporter B(0+)	0.124224	1.1987	0.267	0.178	0.022	0.533	0.5	0.5	0.412	0.588	0.48	0.52	0.35	0.65	0.44	0.2	0.06	0.3	0.333	0.667	0.27	0.238	0.492	0.727	0.273	0.121	0.121	0.152	0.212	0.182	0.212	1	0.385	0.615	0.5	0.154	0.077	0.269	0.619	0.381	0.471	0.235	0.059	0.059	0.059	0.118	0.122
lcl|NM_012292.4_cds_NP_036424.2_1	ARHGAP45	rho GTPase-activating protein 45 isoform 1 precursor	0.0840611	0.813563	0.071	0.562	0.214	0.152	0.739	0.261	0.846	0.154	0.099	0.901	0.867	0.133	0.101	0.494	0.291	0.114	0.844	0.156	0.04	0.88	0.08	0.115	0.885	0.043	0.216	0.672	0.052	0	0.017	1	0.917	0.083	0.104	0.478	0.313	0.104	0.051	0.949	0.026	0.118	0.053	0.289	0.408	0.105	0.38
lcl|NM_012335.4_cds_NP_036467.2_1	MYO1F	unconventional myosin-If isoform 1	0.0872417	0.834011	0.082	0.672	0.115	0.131	0.538	0.462	0.786	0.214	0.182	0.818	0.811	0.189	0.13	0.533	0.261	0.076	0.895	0.105	0.019	0.833	0.148	0.147	0.853	0.022	0.283	0.533	0.098	0	0.065	1	0.792	0.208	0.105	0.596	0.123	0.175	0.15	0.85	0.067	0.157	0.135	0.281	0.292	0.067	0.477
lcl|NM_013404.4_cds_NP_037536.2_1	MSLN	mesothelin isoform 2 preproprotein	0.105835	1.01596	0.054	0.464	0.196	0.286	0.583	0.417	0.824	0.176	0.194	0.806	0.889	0.111	0.227	0.364	0.341	0.068	0.833	0.167	0.059	0.824	0.118	0.182	0.818	0.097	0.243	0.544	0.039	0	0.078	1	0.667	0.333	0.145	0.491	0.145	0.218	0.121	0.879	0	0.136	0.045	0.273	0.5	0.045	0.349
lcl|NM_014059.3_cds_NP_054778.2_1	RGCC	regulator of cell cycle RGCC	0.145241	1.40039	0.12	0.4	0.36	0.12	1	0	0.769	0.231	0.2	0.8	0.875	0.125	0.333	0.667	0	0	1	0	0	0	1	0.714	0.286	0.077	0.077	0.462	0.231	0.154	0	1	0.5	0.5	0.25	0.375	0.25	0.125	0	1	0	0.2	0	0.6	0.2	0	0.429
lcl|NM_014143.4_cds_NP_054862.1_1	CD274	programmed cell death 1 ligand 1 isoform a precursor	0.155651	1.46045	0.375	0.312	0	0.312	0.667	0.333	0.429	0.571	0.524	0.476	0.545	0.455	0.25	0.167	0.167	0.417	0.111	0.889	0.105	0.474	0.421	0.421	0.579	0.1	0.033	0.367	0.1	0.167	0.233	1	0.5	0.5	0.5	0.2	0	0.3	0.5	0.5	0.467	0.267	0.067	0.067	0.067	0.067	0.385
lcl|NM_014218.3_cds_NP_055033.2_1	KIR2DL1	killer cell immunoglobulin-like receptor 2DL1 precursor	0.157398	1.50195	0.235	0.353	0.176	0.235	0.75	0.25	0.733	0.267	0.421	0.579	0.714	0.286	0.304	0.13	0.391	0.174	0.625	0.375	0.071	0.714	0.214	0.667	0.333	0.061	0.273	0.394	0.121	0	0.152	1	0.538	0.462	0.308	0.308	0	0.385	0.25	0.75	0.389	0.167	0.056	0.278	0.056	0.056	0.125
lcl|NM_014360.4_cds_NP_055175.2_1	NKX2-8	homeobox protein Nkx-2.8	0.127041	1.24048	0.094	0.5	0.312	0.094	1	0	0.778	0.222	0.067	0.933	1	0	0.111	0.667	0.111	0.111	0.8	0.2	0	1	0	0.125	0.875	0.077	0.077	0.577	0.154	0.077	0.038	1	0.5	0.5	0.179	0.393	0.25	0.179	0.077	0.923	0	0.13	0	0.522	0.304	0.043	0.273
lcl|NM_014398.4_cds_NP_055213.2_1	LAMP3	lysosome-associated membrane glycoprotein 3 precursor	0.147365	1.44327	0.405	0.31	0.167	0.119	0.5	0.5	0.357	0.643	0.636	0.364	0.357	0.643	0.375	0.167	0.25	0.208	0.615	0.385	0.2	0.4	0.4	0.647	0.353	0.071	0.214	0.25	0.214	0.107	0.143	1	0.714	0.286	0.406	0.219	0	0.375	0.483	0.517	0.5	0.083	0.083	0.167	0.167	0	0.206
lcl|NM_015234.5_cds_NP_056049.4_1	ADGRF5	adhesion G protein-coupled receptor F5 precursor	0.0892527	0.852196	0.262	0.4	0.031	0.308	0.659	0.341	0.511	0.489	0.686	0.314	0.565	0.435	0.333	0.217	0.246	0.203	0.556	0.444	0.214	0.439	0.347	0.412	0.588	0.075	0.25	0.292	0.142	0.067	0.175	1	0.451	0.549	0.443	0.131	0.049	0.377	0.354	0.646	0.342	0.368	0.026	0.105	0.132	0.026	0.227
lcl|NM_015868.3_cds_NP_056952.2_1	KIR2DL3	killer cell immunoglobulin-like receptor 2DL3 precursor	0.15119	1.45545	0.333	0.467	0	0.2	0.75	0.25	0.733	0.267	0.368	0.632	0.733	0.267	0.292	0.125	0.375	0.208	0.625	0.375	0	0.833	0.167	0.545	0.455	0.062	0.281	0.344	0.156	0	0.156	1	0.667	0.333	0.241	0.379	0.034	0.345	0.308	0.692	0.412	0.294	0	0.118	0.059	0.118	0.143
lcl|NM_016184.3_cds_NP_057268.1_1	CLEC4A	C-type lectin domain family 4 member A isoform 1	0.146918	1.39293	0.231	0.308	0	0.462	0.333	0.667	0.286	0.714	0.524	0.476	0.529	0.471	0.167	0.333	0.167	0.333	0.5	0.5	0.2	0.5	0.3	0.529	0.471	0.111	0.056	0.389	0.222	0.056	0.167	1	0.231	0.769	0.364	0.455	0	0.182	0.545	0.455	0.222	0.333	0.111	0.111	0	0.222	0.04
lcl|NM_016232.5_cds_NP_057316.3_1	IL1RL1	interleukin-1 receptor-like 1 isoform 1 precursor	0.136639	1.32422	0.244	0.341	0.098	0.317	0.267	0.733	0.423	0.577	0.448	0.552	0.333	0.667	0.423	0.231	0.231	0.115	0.714	0.286	0.205	0.256	0.538	0.556	0.444	0.132	0.132	0.321	0.151	0.113	0.151	1	0.233	0.767	0.333	0.19	0	0.476	0.5	0.5	0.407	0.407	0.037	0	0.074	0.074	0.139
lcl|NM_016369.4_cds_NP_057453.1_1	CLDN18	claudin-18 isoform 1 precursor	0.139088	1.31456	0.12	0.6	0.12	0.16	0.875	0.125	0.857	0.143	0.571	0.429	0.667	0.333	0.167	0.4	0.233	0.2	0.667	0.333	0.067	0.6	0.333	0.444	0.556	0.048	0.19	0.667	0.095	0	0	1	1	0	0.333	0.333	0	0.333	0.25	0.75	0	0.5	0.125	0.25	0.125	0	0.19
lcl|NM_016452.2_cds_NP_057536.1_1	CAPN9	calpain-9 isoform 2	0.120578	1.15593	0.184	0.51	0.061	0.245	0.727	0.273	0.628	0.372	0.25	0.75	0.66	0.34	0.184	0.368	0.289	0.158	0.688	0.312	0.079	0.579	0.342	0.476	0.524	0.076	0.167	0.515	0.136	0.03	0.076	1	0.52	0.48	0.276	0.31	0.103	0.31	0.233	0.767	0.289	0.184	0.079	0.105	0.342	0	0.4
lcl|NM_016583.4_cds_NP_057667.1_1	BPIFA1	BPI fold-containing family A member 1 precursor	0.143791	1.30419	0.333	0.444	0	0.222	1	0	0.75	0.25	0.5	0.5	0.25	0.75	0.273	0.394	0.152	0.182	0.6	0.4	0.105	0.526	0.368	0.25	0.75	0.017	0.172	0.466	0.172	0.034	0.138	1	0.417	0.583	0.056	0.5	0.056	0.389	0.333	0.667	0.4	0.4	0	0	0	0.2	0.417
lcl|NM_017434.5_cds_NP_059130.2_1	DUOX1	dual oxidase 1 precursor	0.0825048	0.776031	0.196	0.457	0.13	0.217	0.536	0.464	0.761	0.239	0.204	0.796	0.704	0.296	0.192	0.434	0.333	0.04	0.766	0.234	0	0.833	0.167	0.13	0.87	0.028	0.25	0.589	0.056	0.017	0.061	1	0.681	0.319	0.122	0.622	0.067	0.189	0.081	0.919	0.114	0.138	0.081	0.26	0.35	0.057	0.345
lcl|NM_017439.4_cds_NP_059135.2_1	GSAP	gamma-secretase-activating protein isoform a	0.11191	1.09905	0.275	0.225	0.15	0.35	0.455	0.545	0.462	0.538	0.642	0.358	0.333	0.667	0.474	0.184	0.211	0.132	0.45	0.55	0.12	0.24	0.64	0.532	0.468	0.076	0.168	0.277	0.168	0.16	0.151	1	0.49	0.51	0.276	0.069	0.103	0.552	0.333	0.667	0.394	0.273	0.061	0.03	0.182	0.061	0.157
lcl|NM_018058.7_cds_NP_060528.3_1	CRTAC1	cartilage acidic protein 1 isoform A precursor	0.115373	1.07721	0.065	0.516	0.081	0.339	0.714	0.286	0.706	0.294	0.176	0.824	0.724	0.276	0.167	0.424	0.318	0.091	0.545	0.455	0	0.84	0.16	0.111	0.889	0	0.383	0.489	0.043	0.021	0.064	1	0.59	0.41	0.128	0.538	0.128	0.205	0.133	0.867	0.07	0.093	0.093	0.279	0.395	0.07	0.348
lcl|NM_018370.3_cds_NP_060840.2_1	DRAM1	DNA damage-regulated autophagy modulator protein 1	0.164156	1.61624	0.176	0.471	0.059	0.294	0.444	0.556	0.2	0.8	0.5	0.5	0.6	0.4	0.4	0.133	0.133	0.333	0.75	0.25	0.238	0.429	0.333	0.4	0.6	0.19	0.238	0.143	0.143	0.095	0.19	1	0.5	0.5	0.3	0.4	0.1	0.2	0.375	0.625	0.4	0.4	0	0	0.2	0	0.048
lcl|NM_018643.5_cds_NP_061113.1_1	TREM1	triggering receptor expressed on myeloid cells 1 isoform 1 precursor	0.160818	1.53805	0.2	0.3	0	0.5	0.5	0.5	0.4	0.6	0.462	0.538	0.444	0.556	0.273	0.091	0.364	0.273	0.25	0.75	0.25	0.5	0.25	0.267	0.733	0.077	0.192	0.5	0.077	0.077	0.077	1	0.375	0.625	0.188	0.312	0.062	0.438	0.333	0.667	0.077	0.538	0.154	0.231	0	0	0.235
lcl|NM_018965.4_cds_NP_061838.1_1	TREM2	triggering receptor expressed on myeloid cells 2 precursor isoform 1 precursor	0.138773	1.26316	0.188	0.5	0.125	0.188	0.833	0.167	0.538	0.462	0.25	0.75	0.714	0.286	0.263	0.316	0.316	0.105	0.455	0.545	0	0.778	0.222	0	1	0.056	0.389	0.444	0.028	0.028	0.056	1	0.5	0.5	0.429	0.5	0	0.071	0.182	0.818	0.083	0.417	0	0.167	0.25	0.083	0.412
lcl|NM_019601.4_cds_NP_062547.1_1	SUSD2	sushi domain-containing protein 2 precursor	0.09842	0.929498	0.254	0.444	0.206	0.095	0.714	0.286	0.791	0.209	0.061	0.939	0.829	0.171	0.129	0.557	0.243	0.071	0.846	0.154	0.077	0.923	0	0.278	0.722	0.012	0.235	0.682	0.024	0	0.047	1	0.857	0.143	0.172	0.603	0.103	0.121	0.194	0.806	0.049	0.171	0.098	0.317	0.244	0.122	0.382
lcl|NM_020056.5_cds_NP_064440.1_1	HLA-DQA2	HLA class II histocompatibility antigen, DQ alpha 2 chain precursor	0.14928	1.37125	0.071	0.5	0	0.429	0.5	0.5	0.727	0.273	0.222	0.778	0.533	0.467	0.158	0.316	0.211	0.316	0.667	0.333	0.083	0.583	0.333	0.556	0.444	0.036	0.286	0.429	0.071	0.036	0.143	1	0.667	0.333	0.071	0.214	0.071	0.643	0.25	0.75	0.75	0	0	0	0	0.25	0.174
lcl|NM_020356.4_cds_NP_065089.2_1	CASS4	cas scaffolding protein family member 4 isoform a	0.11961	1.14027	0.235	0.412	0.176	0.176	0.5	0.5	0.743	0.257	0.5	0.5	0.364	0.636	0.229	0.4	0.257	0.114	0.765	0.235	0.125	0.594	0.281	0.25	0.75	0.026	0.303	0.382	0.145	0.079	0.066	1	0.464	0.536	0.239	0.352	0.042	0.366	0.268	0.732	0.34	0.3	0.06	0.12	0.16	0.02	0.322
lcl|NM_020956.2_cds_NP_066007.1_1	PRX	periaxin isoform 1	0.13019	1.28294	0.062	0.625	0.25	0.062	1	0	0.833	0.167	0.133	0.867	1	0	0.091	0.545	0.364	0	0	0	0	0.8	0.2	0.286	0.714	0.062	0.062	0.75	0.062	0	0.062	1	1	0	0	0.4	0.5	0.1	0.25	0.75	0	0.231	0.077	0.308	0.385	0	0.5
lcl|NM_022475.3_cds_NP_071920.1_1	HHIP	hedgehog-interacting protein precursor	0.128469	1.23972	0.476	0.238	0.048	0.238	0.618	0.382	0.405	0.595	0.696	0.304	0.469	0.531	0.333	0.197	0.273	0.197	0.55	0.45	0.267	0.267	0.467	0.55	0.45	0.103	0.167	0.372	0.141	0.077	0.141	1	0.593	0.407	0.359	0.205	0.077	0.359	0.52	0.48	0.52	0.2	0.04	0.06	0.12	0.06	0.188
lcl|NM_022570.5_cds_NP_072092.2_1	CLEC7A	C-type lectin domain family 7 member A isoform b	0.156105	1.51469	0.167	0	0	0.833	0.25	0.75	0.333	0.667	0.5	0.5	0.429	0.571	0.6	0.2	0.1	0.1	0.667	0.333	0.467	0.133	0.4	0.429	0.571	0.2	0.15	0.2	0.1	0.15	0.2	1	0.2	0.8	0.25	0.167	0	0.583	0.8	0.2	0.4	0.2	0	0.2	0.2	0	0.179
lcl|NM_023938.6_cds_NP_076427.2_1	C1orf116	specifically androgen-regulated gene protein isoform 1	0.121883	1.13884	0.192	0.308	0.038	0.462	0	1	0.65	0.35	0.267	0.733	0.889	0.111	0.31	0.333	0.214	0.143	0.909	0.091	0.067	0.6	0.333	0.281	0.719	0.074	0.167	0.556	0.074	0.037	0.093	1	0.538	0.462	0.325	0.325	0.065	0.286	0.231	0.769	0.211	0.289	0.105	0.158	0.132	0.105	0.383
lcl|NM_024574.4_cds_NP_078850.3_1	NDNF	protein NDNF precursor	0.132622	1.275	0.346	0.308	0.038	0.308	0.273	0.727	0.314	0.686	0.594	0.406	0.303	0.697	0.321	0.214	0.25	0.214	0.636	0.364	0.217	0.391	0.391	0.579	0.421	0.096	0.173	0.365	0.173	0.096	0.096	1	0.611	0.389	0.364	0.273	0.03	0.333	0.219	0.781	0.32	0.36	0.04	0.08	0.12	0.08	0.174
lcl|NM_024830.5_cds_NP_079106.3_1	LPCAT1	lysophosphatidylcholine acyltransferase 1	0.127145	1.2576	0.155	0.517	0.224	0.103	0.545	0.455	0.808	0.192	0.45	0.55	0.769	0.231	0.375	0.281	0.219	0.125	0.833	0.167	0.13	0.696	0.174	0.208	0.792	0.051	0.237	0.576	0.068	0.034	0.034	1	0.889	0.111	0.162	0.297	0.189	0.351	0.222	0.778	0.111	0.222	0.111	0.111	0.417	0.028	0.344
lcl|NM_024873.6_cds_NP_079149.3_1	TNIP3	TNFAIP3-interacting protein 3 isoform 1	0.133075	1.30975	0.286	0.214	0.143	0.357	0.3	0.7	0.647	0.353	0.578	0.422	0.571	0.429	0.333	0.5	0	0.167	0.3	0.7	0.571	0.143	0.286	0.444	0.556	0.091	0.091	0.242	0.212	0.152	0.212	1	0.333	0.667	0.583	0.083	0.25	0.083	0.387	0.613	0.37	0.222	0.111	0.111	0.185	0	0.062
lcl|NM_025218.4_cds_NP_079494.1_1	ULBP1	UL16-binding protein 1 isoform 1 precursor	0.146928	1.37837	0.176	0.588	0.118	0.118	0.375	0.625	0.545	0.455	0.667	0.333	0.714	0.286	0.385	0.385	0.231	0	0.625	0.375	0.111	0.444	0.444	0.294	0.706	0.062	0.25	0.344	0.281	0.031	0.031	1	0.571	0.429	0.267	0.4	0.067	0.267	0.545	0.455	0.556	0.333	0	0	0.111	0	0.167
lcl|NM_030788.4_cds_NP_110415.1_1	DCSTAMP	dendritic cell-specific transmembrane protein isoform 1	0.137998	1.34699	0.52	0.24	0.04	0.2	0.385	0.615	0.417	0.583	0.474	0.526	0.321	0.679	0.269	0.346	0.192	0.192	0.308	0.692	0.135	0.486	0.378	0.5	0.5	0.093	0.147	0.333	0.253	0.013	0.16	1	0.545	0.455	0.381	0.286	0.19	0.143	0.444	0.556	0.25	0.45	0.1	0.05	0.1	0.05	0.205
lcl|NM_031313.3_cds_NP_112603.2_1	ALPG	alkaline phosphatase, germ cell type preproprotein	0.115697	1.10186	0.133	0.617	0.15	0.1	1	0	0.871	0.129	0.074	0.926	0.833	0.167	0.157	0.333	0.314	0.196	0.625	0.375	0.059	0.765	0.176	0.2	0.8	0.071	0.232	0.625	0.018	0	0.054	1	0.867	0.133	0.194	0.355	0.226	0.226	0.045	0.955	0	0.25	0.107	0.393	0.25	0	0.3
lcl|NM_031439.4_cds_NP_113627.1_1	SOX7	transcription factor SOX-7	0.115125	1.10482	0.036	0.75	0.107	0.107	0.667	0.333	0.789	0.211	0.13	0.87	1	0	0.088	0.5	0.265	0.147	0.8	0.2	0	1	0	0.071	0.929	0	0.244	0.659	0.073	0	0.024	1	0.889	0.111	0.118	0.333	0.353	0.196	0.188	0.812	0.045	0.182	0	0.273	0.455	0.045	0.3
lcl|NM_032447.5_cds_NP_115823.3_1	FBN3	fibrillin-3 precursor	0.0622986	0.586156	0.167	0.573	0.073	0.187	0.596	0.404	0.612	0.388	0.212	0.788	0.75	0.25	0.093	0.548	0.243	0.116	0.795	0.205	0.014	0.75	0.236	0.275	0.725	0.026	0.263	0.574	0.095	0	0.042	1	0.7	0.3	0.158	0.435	0.13	0.277	0.14	0.86	0.037	0.149	0.099	0.323	0.329	0.062	0.408
lcl|NM_032571.5_cds_NP_115960.2_1	ADGRE3	adhesion G protein-coupled receptor E3 isoform 1 precursor	0.118366	1.13642	0.108	0.405	0.081	0.405	0.5	0.5	0.474	0.526	0.519	0.481	0.657	0.343	0.371	0.286	0.2	0.143	0.769	0.231	0.061	0.606	0.333	0.583	0.417	0.038	0.333	0.372	0.103	0.026	0.128	1	0.562	0.438	0.455	0.455	0	0.091	0.412	0.588	0.444	0.222	0.111	0	0.167	0.056	0.175
lcl|NM_033120.4_cds_NP_149111.1_1	NKD2	protein naked cuticle homolog 2 isoform 1	0.125612	1.19809	0.225	0.45	0.175	0.15	0.833	0.167	0.826	0.174	0.1	0.9	0.875	0.125	0.118	0.441	0.382	0.059	0.97	0.03	0	0.5	0.5	0.174	0.826	0.08	0.52	0.36	0	0	0.04	1	0.875	0.125	0.196	0.333	0.255	0.216	0.125	0.875	0.073	0.293	0.024	0.268	0.293	0.049	0.343
lcl|NM_033131.4_cds_NP_149122.1_1	WNT3A	protein Wnt-3a precursor	0.101941	0.964984	0.071	0.714	0.071	0.143	0.84	0.16	0.929	0.071	0.045	0.955	0.786	0.214	0.033	0.667	0.167	0.133	1	0	0	0.857	0.143	0.067	0.933	0	0.3	0.65	0	0.05	0	1	1	0	0.25	0.5	0.188	0.062	0.091	0.909	0	0.069	0.034	0.621	0.276	0	0.433
lcl|NM_033197.3_cds_NP_149974.2_1	BPIFB1	BPI fold-containing family B member 1 precursor	0.122521	1.13727	0.2	0.525	0	0.275	0	1	0.8	0.2	0.45	0.55	0.688	0.312	0.217	0.435	0.217	0.13	0.5	0.5	0.056	0.833	0.111	0.267	0.733	0.051	0.205	0.513	0.077	0.026	0.128	1	0.667	0.333	0.214	0.429	0.143	0.214	0.28	0.72	0.111	0	0	0.444	0.333	0.111	0.238
lcl|NM_052863.3_cds_NP_443095.2_1	SCGB3A1	secretoglobin family 3A member 1 precursor	0.0935725	0.830064	0	0.619	0.143	0.238	0.667	0.333	0	0	0	1	0.5	0.5	0	0.455	0.455	0.091	1	0	0.5	0.5	0	0	1	0	0.333	0.619	0	0.048	0	1	1	0	0	0.5	0.167	0.333	0	1	0	0	0	0	0	0	0.375
lcl|NM_130770.3_cds_NP_570126.2_1	HTR3C	5-hydroxytryptamine receptor 3C precursor	0.132645	1.24058	0.217	0.565	0.087	0.13	0.556	0.444	0.667	0.333	0.235	0.765	0.769	0.231	0.222	0.407	0.259	0.111	0.833	0.167	0.08	0.72	0.2	0.188	0.812	0.031	0.323	0.492	0.077	0.031	0.046	1	0.632	0.368	0.414	0.241	0.034	0.31	0.25	0.75	0.25	0.312	0.062	0.188	0	0.188	0.344
lcl|NM_130771.4_cds_NP_570127.3_1	OSCAR	osteoclast-associated immunoglobulin-like receptor isoform 3 precursor	0.140422	1.3622	0.083	0.375	0.25	0.292	0.833	0.167	0.75	0.25	0.182	0.818	0.625	0.375	0.19	0.333	0.333	0.143	1	0	0.125	0.75	0.125	0	1	0.029	0.114	0.771	0.057	0	0.029	1	1	0	0.143	0.393	0.25	0.214	0.222	0.778	0.1	0.05	0.05	0.55	0.25	0	0.286
lcl|NM_133168.4_cds_NP_573398.2_1	OSCAR	osteoclast-associated immunoglobulin-like receptor isoform 5 precursor	0.135633	1.31447	0.087	0.348	0.261	0.304	1	0	0.714	0.286	0.182	0.818	0.667	0.333	0.19	0.333	0.333	0.143	1	0	0	1	0	0	1	0.029	0.118	0.765	0.059	0	0.029	1	1	0	0.154	0.423	0.231	0.192	0.222	0.778	0.1	0.05	0.05	0.55	0.25	0	0.3
lcl|NM_133169.4_cds_NP_573399.2_1	OSCAR	osteoclast-associated immunoglobulin-like receptor isoform 4 precursor	0.137067	1.32975	0.087	0.348	0.261	0.304	0.833	0.167	0.75	0.25	0.182	0.818	0.625	0.375	0.19	0.333	0.333	0.143	1	0	0	1	0	0	1	0.029	0.114	0.771	0.057	0	0.029	1	1	0	0.143	0.393	0.25	0.214	0.222	0.778	0.1	0.05	0.05	0.55	0.25	0	0.286
lcl|NM_133269.4_cds_NP_579803.1_1	FCAR	immunoglobulin alpha Fc receptor isoform b precursor	0.162471	1.53128	0.474	0.368	0	0.158	0.625	0.375	0.538	0.462	0.538	0.462	0.5	0.5	0.312	0.25	0.312	0.125	0.875	0.125	0.312	0.375	0.312	0.5	0.5	0	0.241	0.448	0.069	0	0.241	1	0.556	0.444	0.333	0.267	0.133	0.267	0.25	0.75	0.214	0.286	0.143	0.143	0.143	0.071	0.19
lcl|NM_133271.4_cds_NP_579805.1_1	FCAR	immunoglobulin alpha Fc receptor isoform c precursor	0.164471	1.54609	0.467	0.333	0	0.2	0.5	0.5	0.6	0.4	0.556	0.444	0.5	0.5	0.375	0.25	0.375	0	0.8	0.2	0.385	0.308	0.308	0.5	0.5	0	0.211	0.526	0.053	0	0.211	1	0.667	0.333	0.222	0.333	0.111	0.333	0.214	0.786	0.182	0.273	0.182	0.182	0.091	0.091	0.25
lcl|NM_133272.4_cds_NP_579806.1_1	FCAR	immunoglobulin alpha Fc receptor isoform d	0.163423	1.54238	0.421	0.421	0	0.158	0.714	0.286	0.538	0.462	0.462	0.538	0.545	0.455	0.312	0.188	0.312	0.188	0.875	0.125	0.333	0.4	0.267	0.5	0.5	0	0.2	0.433	0.1	0	0.267	1	0.545	0.455	0.294	0.353	0.118	0.235	0.308	0.692	0.214	0.286	0.143	0.143	0.143	0.071	0.208
lcl|NM_133273.4_cds_NP_579807.1_1	FCAR	immunoglobulin alpha Fc receptor isoform e	0.170301	1.60642	0.429	0.357	0	0.214	0.6	0.4	0.6	0.4	0.5	0.5	0.5	0.5	0.429	0.143	0.429	0	0.8	0.2	0.417	0.333	0.25	0.5	0.5	0	0.176	0.529	0.059	0	0.235	1	0.667	0.333	0.222	0.333	0.111	0.333	0.273	0.727	0.2	0.2	0.2	0.2	0.1	0.1	0.25
lcl|NM_133274.4_cds_NP_579808.1_1	FCAR	immunoglobulin alpha Fc receptor isoform f	0.172529	1.62582	0.5	0.4	0	0.1	0.75	0.25	0.583	0.417	0.4	0.6	0.556	0.444	0.158	0.368	0.263	0.211	0.667	0.333	0.333	0.333	0.333	0.625	0.375	0	0.217	0.391	0.174	0.043	0.174	1	0.5	0.5	0.312	0.25	0.125	0.312	0.25	0.75	0.333	0.2	0.067	0.067	0.133	0.2	0.062
lcl|NM_133277.4_cds_NP_579811.1_1	FCAR	immunoglobulin alpha Fc receptor isoform g	0.168067	1.55923	0.429	0.429	0	0.143	0.6	0.4	0.429	0.571	0.625	0.375	0.5	0.5	0.364	0.182	0.182	0.273	0.833	0.167	0.167	0.667	0.167	0.4	0.6	0	0.25	0.333	0.125	0	0.292	1	0.5	0.5	0.417	0.333	0.167	0.083	0.375	0.625	0.167	0.333	0.167	0.167	0.167	0	0.278
lcl|NM_133278.4_cds_NP_579812.1_1	FCAR	immunoglobulin alpha Fc receptor isoform h	0.167261	1.58203	0.444	0.389	0	0.167	0.714	0.286	0.538	0.462	0.5	0.5	0.5	0.5	0.333	0.2	0.333	0.133	0.875	0.125	0.333	0.4	0.267	0.5	0.5	0	0.222	0.444	0.074	0	0.259	1	0.556	0.444	0.333	0.267	0.133	0.267	0.308	0.692	0.231	0.231	0.154	0.154	0.154	0.077	0.19
lcl|NM_138295.5_cds_NP_612152.1_1	PKD1L1	polycystic kidney disease protein 1-like 1	0.053873	0.512614	0.241	0.317	0.08	0.362	0.541	0.459	0.635	0.365	0.461	0.539	0.492	0.508	0.269	0.285	0.269	0.177	0.543	0.457	0.171	0.362	0.467	0.465	0.535	0.06	0.242	0.349	0.173	0.069	0.107	1	0.563	0.437	0.244	0.324	0.08	0.352	0.35	0.65	0.303	0.335	0.097	0.103	0.11	0.052	0.232
lcl|NM_138715.3_cds_NP_619729.1_1	MSR1	macrophage scavenger receptor types I and II isoform type 1	0.140827	1.3645	0.4	0.25	0	0.35	0.375	0.625	0.316	0.684	0.684	0.316	0.235	0.765	0.457	0.109	0.152	0.283	0.538	0.462	0.346	0.269	0.385	0.72	0.28	0.024	0.268	0.22	0.146	0.146	0.195	1	0.24	0.76	0.391	0.087	0.13	0.391	0.577	0.423	0.35	0.15	0.2	0.15	0.1	0.05	0.235
lcl|NM_138716.2_cds_NP_619730.1_1	MSR1	macrophage scavenger receptor types I and II isoform type 3	0.140661	1.34197	0.412	0.235	0	0.353	0.5	0.5	0.294	0.706	0.714	0.286	0.267	0.733	0.514	0.086	0.143	0.257	0.333	0.667	0.333	0.292	0.375	0.739	0.261	0.026	0.263	0.211	0.158	0.158	0.184	1	0.24	0.76	0.35	0.1	0.15	0.4	0.591	0.409	0.467	0.067	0.2	0.067	0.133	0.067	0.156
lcl|NM_138969.3_cds_NP_620419.2_1	SDR16C5	epidermal retinol dehydrogenase 2 isoform 2	0.140683	1.37318	0.231	0.346	0	0.423	0.444	0.556	0.417	0.583	0.765	0.235	0.273	0.727	0.52	0.2	0.16	0.12	0.2	0.8	0.222	0.389	0.389	0.517	0.483	0.077	0.179	0.231	0.179	0.154	0.179	1	0.333	0.667	0.6	0.2	0	0.2	0.75	0.25	0.333	0.167	0	0	0.5	0	0.111
lcl|NM_139018.5_cds_NP_620587.2_1	CD300LF	CMRF35-like molecule 1 isoform 1 precursor	0.13837	1.28934	0.267	0.333	0	0.4	0.5	0.5	0.786	0.214	0.333	0.667	1	0	0.222	0.5	0.167	0.111	1	0	0.091	0.455	0.455	0.333	0.667	0	0.325	0.35	0.1	0	0.225	1	0.5	0.5	0.333	0.333	0.2	0.133	0.267	0.733	0.091	0.455	0.091	0.091	0.182	0.091	0.217
lcl|NM_139248.3_cds_NP_640341.1_1	LIPH	lipase member H precursor	0.144882	1.37576	0.409	0.182	0.091	0.318	0.538	0.462	0.484	0.516	0.529	0.471	0.5	0.5	0.469	0.281	0.188	0.062	0.417	0.583	0.273	0.318	0.409	0.583	0.417	0.102	0.102	0.245	0.122	0.143	0.286	1	0.5	0.5	0.304	0.217	0.043	0.435	0.467	0.533	0.417	0.458	0.083	0	0.042	0	0.125
lcl|NM_139278.4_cds_NP_644807.1_1	LGI3	leucine-rich repeat LGI family member 3 precursor	0.11679	1.07684	0.196	0.522	0.109	0.174	0.923	0.077	0.743	0.257	0.062	0.938	0.75	0.25	0.233	0.467	0.167	0.133	1	0	0	0.65	0.35	0.053	0.947	0.045	0.224	0.597	0.03	0.015	0.09	1	0.706	0.294	0.114	0.543	0.229	0.114	0.094	0.906	0.086	0.143	0.086	0.371	0.257	0.057	0.262
lcl|NM_144687.4_cds_NP_653288.1_1	NLRP12	NACHT, LRR and PYD domains-containing protein 12 isoform 2	0.0991513	0.956783	0.231	0.354	0.215	0.2	0.69	0.31	0.8	0.2	0.218	0.782	0.763	0.237	0.181	0.431	0.319	0.069	0.759	0.241	0.152	0.727	0.121	0.233	0.767	0.05	0.257	0.453	0.078	0.022	0.14	1	0.684	0.316	0.261	0.435	0.109	0.196	0.148	0.852	0.135	0.378	0.081	0.176	0.216	0.014	0.391
lcl|NM_145286.3_cds_NP_660329.1_1	STOML3	stomatin-like protein 3 isoform 1	0.167988	1.61598	0.154	0.385	0.038	0.423	0.75	0.25	0.25	0.75	0.412	0.588	0.5	0.5	0.286	0.214	0.214	0.286	0.333	0.667	0.174	0.565	0.261	0.438	0.562	0.031	0.125	0.438	0.125	0.094	0.188	1	0.333	0.667	0.364	0.364	0	0.273	0.385	0.615	0.294	0.059	0.176	0.118	0.235	0.118	0.15
lcl|NM_145307.4_cds_NP_660350.2_1	RTKN2	rhotekin-2 isoform 1	0.125676	1.19414	0.289	0.237	0.053	0.421	0.375	0.625	0.265	0.735	0.705	0.295	0.375	0.625	0.435	0.043	0.217	0.304	0.357	0.643	0.361	0.167	0.472	0.667	0.333	0.15	0.133	0.167	0.217	0.167	0.167	1	0.269	0.731	0.455	0.121	0.03	0.394	0.344	0.656	0.333	0.148	0.37	0.074	0.074	0	0.152
lcl|NM_152459.4_cds_NP_689672.4_1	C16orf89	UPF0764 protein C16orf89 isoform 1 precursor	0.130606	1.26327	0.08	0.48	0.04	0.4	0.9	0.1	0.611	0.389	0.44	0.56	0.7	0.3	0.25	0.286	0.429	0.036	0.375	0.625	0	0.714	0.286	0.357	0.643	0.048	0.323	0.516	0	0.065	0.048	1	0.714	0.286	0.24	0.32	0.16	0.28	0.269	0.731	0.348	0.261	0.087	0.174	0.13	0	0.25
lcl|NM_152611.5_cds_NP_689824.2_1	LRRN4	leucine-rich repeat neuronal protein 4 precursor	0.105298	1.02138	0.139	0.456	0.304	0.101	0.792	0.208	0.645	0.355	0.185	0.815	0.824	0.176	0.132	0.415	0.377	0.075	0.789	0.211	0.154	0.692	0.154	0.091	0.909	0.049	0.255	0.578	0.059	0	0.059	1	0.955	0.045	0.121	0.439	0.258	0.182	0.105	0.895	0.044	0.244	0.022	0.378	0.311	0	0.37
lcl|NM_152623.2_cds_NP_689836.2_1	CDC20B	cell division cycle protein 20 homolog B isoform 1	0.142709	1.37474	0.25	0.281	0.094	0.375	0.462	0.538	0.28	0.72	0.44	0.56	0.111	0.889	0.351	0.216	0.27	0.162	0.5	0.5	0.333	0.333	0.333	0.485	0.515	0.083	0.188	0.396	0.146	0.083	0.104	1	0.429	0.571	0.263	0.316	0.158	0.263	0.407	0.593	0.24	0.28	0.04	0.2	0.16	0.08	0.155
lcl|NM_152701.5_cds_NP_689914.3_1	ABCA13	ATP-binding cassette sub-family A member 13	0.0286349	0.276568	0.265	0.321	0.051	0.363	0.458	0.542	0.42	0.58	0.624	0.376	0.399	0.601	0.316	0.283	0.203	0.198	0.424	0.576	0.318	0.27	0.412	0.578	0.422	0.077	0.138	0.256	0.187	0.141	0.2	1	0.4	0.6	0.333	0.257	0.07	0.339	0.453	0.547	0.348	0.285	0.082	0.095	0.101	0.089	0.155
lcl|NM_152717.3_cds_NP_689930.1_1	MS4A15	membrane-spanning 4-domains subfamily A member 15 isoform 2	0.140824	1.29091	0.227	0.591	0.136	0.045	1	0	0.6	0.4	0	1	0.846	0.154	0.308	0.462	0.154	0.077	0.75	0.25	0	0.818	0.182	0	1	0	0.3	0.6	0.1	0	0	1	0.833	0.167	0.143	0.429	0.143	0.286	0.667	0.333	0	0.4	0	0.4	0.2	0	0.455
lcl|NM_152750.5_cds_NP_689963.2_1	CDHR3	cadherin-related family member 3 isoform 1 precursor	0.103916	0.975165	0.245	0.429	0.061	0.265	0.571	0.429	0.438	0.562	0.648	0.352	0.5	0.5	0.283	0.233	0.233	0.25	0.833	0.167	0.18	0.44	0.38	0.429	0.571	0.146	0.268	0.317	0.098	0.037	0.134	1	0.564	0.436	0.475	0.295	0.049	0.18	0.267	0.733	0.475	0.25	0.125	0.125	0	0.025	0.262
lcl|NM_152900.3_cds_NP_690864.2_1	MAGI3	membrane-associated guanylate kinase, WW and PDZ domain-containing protein 3 isoform 2	0.106006	1.0215	0.373	0.271	0.051	0.305	0.5	0.5	0.333	0.667	0.5	0.5	0.424	0.576	0.38	0.231	0.194	0.194	0.467	0.533	0.148	0.295	0.557	0.662	0.338	0.101	0.169	0.258	0.202	0.09	0.18	1	0.4	0.6	0.352	0.205	0.034	0.409	0.309	0.691	0.296	0.185	0.148	0.13	0.148	0.093	0.187
lcl|NM_153264.6_cds_NP_694996.5_1	COL6A5	collagen alpha-5(VI) chain isoform 2 precursor	0.0563754	0.528711	0.295	0.28	0.045	0.379	0.333	0.667	0.404	0.596	0.641	0.359	0.349	0.651	0.425	0.217	0.208	0.15	0.364	0.636	0.21	0.408	0.382	0.6	0.4	0.114	0.157	0.257	0.2	0.124	0.148	1	0.402	0.598	0.421	0.15	0.019	0.411	0.478	0.522	0.427	0.25	0.105	0.048	0.097	0.073	0.247
lcl|NM_172197.3_cds_NP_751947.1_1	AGER	advanced glycosylation end product-specific receptor isoform 7 precursor	0.149928	1.37493	0.25	0.357	0.071	0.321	0.375	0.625	0.333	0.667	0.381	0.619	1	0	0.404	0.128	0.362	0.106	0.667	0.333	0	0.556	0.444	0.2	0.8	0.04	0.2	0.44	0.2	0	0.12	1	0.667	0.333	0.194	0.361	0.056	0.389	0.273	0.727	0.241	0.276	0.103	0.069	0.172	0.138	0.3
lcl|NM_172219.3_cds_NP_757373.1_1	CSF3	granulocyte colony-stimulating factor isoform b precursor	0.125323	1.16333	0.167	0.667	0.042	0.125	0.8	0.2	0.75	0.25	0.4	0.6	0.833	0.167	0.267	0.4	0.2	0.133	0.667	0.333	0	1	0	0	1	0.026	0.179	0.641	0.051	0.026	0.077	1	0	0	0	0.733	0.067	0.2	0.1	0.9	0	0.2	0	0.6	0.2	0	0.562
lcl|NM_172220.3_cds_NP_757374.2_1	CSF3	granulocyte colony-stimulating factor isoform c precursor	0.136815	1.26875	0.19	0.667	0.048	0.095	1	0	0.75	0.25	0.444	0.556	0.833	0.167	0.231	0.385	0.231	0.154	0.5	0.5	0	1	0	0	1	0.032	0.194	0.581	0.065	0.032	0.097	1	0	0	0	0.636	0.091	0.273	0.111	0.889	0	0.2	0	0.6	0.2	0	0.462
lcl|NM_173452.2_cds_NP_775628.1_1	FCN3	ficolin-3 isoform 2 precursor	0.151209	1.43342	0.3	0.5	0.05	0.15	0.5	0.5	0.583	0.417	0.294	0.706	0.545	0.455	0.162	0.351	0.216	0.27	0.9	0.1	0	0.333	0.667	0.286	0.714	0.061	0.242	0.485	0.121	0	0.091	1	0.545	0.455	0.364	0.409	0	0.227	0.222	0.778	0.105	0.263	0.105	0.263	0.158	0.105	0.304
lcl|NM_173494.2_cds_NP_775765.1_1	DNAAF6	protein PIH1D3	0.132829	1.27759	0.25	0.375	0	0.375	0.333	0.667	0.333	0.667	0.656	0.344	0.667	0.333	0.5	0	0.2	0.3	0	0	0.211	0.368	0.421	0.545	0.455	0.111	0.111	0.167	0.278	0.167	0.167	1	0.077	0.923	0.417	0.083	0	0.5	0.375	0.625	0.75	0	0	0	0	0.25	0.059
lcl|NM_173648.4_cds_NP_775919.3_1	CCDC141	coiled-coil domain-containing protein 141 isoform 1	0.0836759	0.80296	0.33	0.213	0.064	0.394	0.476	0.524	0.462	0.538	0.569	0.431	0.438	0.562	0.327	0.236	0.2	0.236	0.4	0.6	0.309	0.309	0.382	0.496	0.504	0.102	0.188	0.188	0.242	0.145	0.134	1	0.268	0.732	0.349	0.07	0.07	0.512	0.397	0.603	0.373	0.254	0.085	0.017	0.186	0.085	0.197
lcl|NM_174936.4_cds_NP_777596.2_1	PCSK9	proprotein convertase subtilisin/kexin type 9 preproprotein	0.114677	1.08597	0.068	0.703	0.081	0.149	0.885	0.115	0.786	0.214	0.109	0.891	0.562	0.438	0.066	0.459	0.328	0.148	0.741	0.259	0.111	0.611	0.278	0.2	0.8	0.042	0.181	0.653	0.042	0	0.083	1	0.769	0.231	0.256	0.333	0.179	0.231	0.133	0.867	0.043	0.234	0.021	0.277	0.362	0.064	0.453
lcl|NM_175060.3_cds_NP_778230.1_1	CLEC14A	C-type lectin domain family 14 member A precursor	0.136505	1.3519	0.176	0.373	0.255	0.196	0.773	0.227	0.789	0.211	0.233	0.767	0.615	0.385	0.122	0.408	0.367	0.102	0.875	0.125	0.091	0.636	0.273	0.308	0.692	0.02	0.275	0.412	0.118	0	0.176	1	0.625	0.375	0.15	0.35	0.25	0.25	0.25	0.75	0.097	0.194	0.097	0.29	0.194	0.129	0.204
lcl|NM_178312.3_cds_NP_842564.1_1	GGTLC1	glutathione hydrolase light chain 1	0.133695	1.20802	0.182	0.5	0	0.318	1	0	0.818	0.182	0.273	0.727	0.778	0.222	0.056	0.5	0.333	0.111	0.833	0.167	0	0.857	0.143	0.2	0.8	0	0.417	0.5	0.083	0	0	1	0.667	0.333	0.154	0.385	0.308	0.154	0.091	0.909	0.125	0.125	0	0.25	0.5	0	0.2
lcl|NM_181486.4_cds_NP_852259.1_1	TBX5	T-box transcription factor TBX5 isoform 1	0.131842	1.28784	0.161	0.419	0.226	0.194	0.556	0.444	0.7	0.3	0.345	0.655	0.55	0.45	0.219	0.531	0.188	0.062	0.654	0.346	0.154	0.385	0.462	0.63	0.37	0.147	0.265	0.412	0.088	0.059	0.029	1	0.389	0.611	0.196	0.451	0.039	0.314	0.194	0.806	0.238	0.429	0.048	0.095	0.19	0	0.286
lcl|NM_181745.4_cds_NP_859529.2_1	FFAR4	free fatty acid receptor 4 isoform GPR120-L	0.13074	1.26854	0.147	0.412	0.324	0.118	1	0	0.818	0.182	0.333	0.667	0.792	0.208	0.2	0.667	0.067	0.067	1	0	0	0.655	0.345	0.333	0.667	0.018	0.345	0.527	0	0.036	0.073	1	0.7	0.3	0.125	0.438	0.125	0.312	0.3	0.7	0.074	0.111	0.111	0.407	0.296	0	0.286
lcl|NM_181882.3_cds_NP_870998.2_1	PRX	periaxin isoform 2	0.0768507	0.728226	0.205	0.397	0.064	0.333	0.667	0.333	0.593	0.407	0.176	0.824	0.516	0.484	0.114	0.303	0.439	0.144	0.636	0.364	0.111	0.667	0.222	0.307	0.693	0.053	0.257	0.5	0.132	0.007	0.053	1	1	0	0.249	0.412	0.136	0.203	0.104	0.896	0.048	0.217	0.145	0.12	0.386	0.084	0.184
lcl|NM_182683.2_cds_NP_872624.1_1	UPK3B	uroplakin-3b isoform c precursor	0.135429	1.27297	0.083	0.5	0.292	0.125	0.5	0.5	0.583	0.417	0.286	0.714	1	0	0.2	0.433	0.333	0.033	0.4	0.6	0.333	0.333	0.333	0	1	0.103	0.256	0.436	0.179	0	0.026	1	0.75	0.25	0.114	0.457	0.114	0.314	0.125	0.875	0	0.133	0.133	0.2	0.467	0.067	0.583
lcl|NM_194447.2_cds_NP_919429.2_1	CLEC4A	C-type lectin domain family 4 member A isoform 3	0.144934	1.36062	0.25	0.25	0	0.5	0.375	0.625	0.286	0.714	0.55	0.45	0.545	0.455	0	0.4	0.2	0.4	0.4	0.6	0.167	0.667	0.167	0.571	0.429	0.091	0.091	0.364	0.273	0.091	0.091	1	0.25	0.75	0.444	0.444	0	0.111	0.545	0.455	0.25	0.25	0.125	0.125	0	0.25	0.048
lcl|NM_194448.2_cds_NP_919430.1_1	CLEC4A	C-type lectin domain family 4 member A isoform 4	0.147609	1.36352	0.25	0.25	0	0.5	0.429	0.571	0.286	0.714	0.562	0.438	0.556	0.444	0	0.4	0.2	0.4	0.5	0.5	0.167	0.667	0.167	0.375	0.625	0.143	0.143	0.429	0.143	0.143	0	1	0.273	0.727	0.5	0.375	0	0.125	0.556	0.444	0.25	0.25	0.125	0.125	0	0.25	0.05
lcl|NM_194450.2_cds_NP_919432.1_1	CLEC4A	C-type lectin domain family 4 member A isoform 2	0.151694	1.42305	0.231	0.308	0	0.462	0.375	0.625	0.286	0.714	0.562	0.438	0.533	0.467	0.167	0.333	0.167	0.333	0.6	0.4	0.222	0.556	0.222	0.333	0.667	0.143	0.071	0.429	0.143	0.071	0.143	1	0.25	0.75	0.4	0.4	0	0.2	0.556	0.444	0.222	0.333	0.111	0.111	0	0.222	0.042
lcl|NM_197947.3_cds_NP_922938.1_1	CLEC7A	C-type lectin domain family 7 member A isoform a	0.146997	1.41698	0.125	0	0	0.875	0.25	0.75	0.4	0.6	0.462	0.538	0.375	0.625	0.583	0.25	0.083	0.083	0.75	0.25	0.438	0.125	0.438	0.6	0.4	0.217	0.13	0.174	0.087	0.174	0.217	1	0.267	0.733	0.214	0.214	0	0.571	0.833	0.167	0.571	0.143	0	0.143	0.143	0	0.167
lcl|NM_197948.3_cds_NP_922939.1_1	CLEC7A	C-type lectin domain family 7 member A isoform c	0.155683	1.46237	0.143	0	0	0.857	0.333	0.667	0.333	0.667	0.556	0.444	0.667	0.333	0.556	0.222	0.111	0.111	0.6	0.4	0.417	0.167	0.417	0.778	0.222	0.238	0.095	0.143	0.048	0.19	0.286	1	0.25	0.75	0.1	0.2	0	0.7	0.857	0.143	0.571	0.143	0	0.143	0	0.143	0.25
lcl|NM_197949.3_cds_NP_922940.1_1	CLEC7A	C-type lectin domain family 7 member A isoform d	0.165246	1.5651	0.2	0	0	0.8	0.333	0.667	0.25	0.75	0.667	0.333	1	0	0.571	0.143	0.143	0.143	0.5	0.5	0.455	0.182	0.364	0.667	0.333	0.222	0.111	0.167	0.056	0.167	0.278	1	0.143	0.857	0.125	0.125	0	0.75	0.8	0.2	0.4	0.2	0	0.2	0	0.2	0.3
lcl|NM_197950.3_cds_NP_922941.1_1	CLEC7A	C-type lectin domain family 7 member A isoform e	0.153503	1.5026	0	0	0	1	0.167	0.833	0.333	0.667	0.5	0.5	0.429	0.571	0.571	0.286	0.143	0	0.667	0.333	0.5	0.1	0.4	0.429	0.571	0.214	0.143	0.143	0.143	0.214	0.143	1	0.2	0.8	0.3	0.2	0	0.5	0.8	0.2	0.5	0.25	0	0	0.25	0	0.192
lcl|NM_197954.3_cds_NP_922945.1_1	CLEC7A	C-type lectin domain family 7 member A isoform f	0.125711	1.14981	0.143	0	0	0.857	0.5	0.5	0.25	0.75	0.8	0.2	1	0	0.667	0	0	0.333	0.5	0.5	0.5	0.167	0.333	1	0	0.111	0.111	0.222	0	0.222	0.333	1	0	1	0	0	0	1	1	0	0	0.5	0	0.5	0	0	0.2
lcl|NM_198153.3_cds_NP_937796.1_1	TREML4	trem-like transcript 4 protein precursor	0.148439	1.36463	0.111	0.556	0	0.333	0.667	0.333	1	0	0.6	0.4	1	0	0.25	0.375	0.188	0.188	0.667	0.333	0	0.889	0.111	0.375	0.625	0.045	0.227	0.364	0.227	0.045	0.091	1	0.429	0.571	0.333	0.444	0	0.222	0.1	0.9	0.667	0.167	0	0	0.167	0	0.15
lcl|NM_198477.3_cds_NP_940879.1_1	CXCL17	C-X-C motif chemokine 17 precursor	0.125686	1.17043	0	0.6	0	0.4	0.5	0.5	0.333	0.667	0.667	0.333	0.6	0.4	0	0.714	0.286	0	0.667	0.333	0	1	0	0.455	0.545	0.188	0.25	0.438	0	0	0.125	1	0.333	0.667	0.571	0.143	0.143	0.143	0.444	0.556	0.692	0.231	0.077	0	0	0	0.3
lcl|NM_198491.3_cds_NP_940893.1_1	CIBAR2	protein FAM92B isoform 1	0.129535	1.24768	0.125	0.667	0.083	0.125	0.2	0.8	0.688	0.312	0.143	0.857	0.5	0.5	0.231	0.231	0.462	0.077	0.1	0.9	0	0.857	0.143	0.364	0.636	0.032	0.258	0.613	0.097	0	0	1	0.6	0.4	0.3	0.4	0	0.3	0.143	0.857	0.1	0.5	0	0.1	0.3	0	0.278
lcl|NM_198511.3_cds_NP_940913.1_1	LANCL3	lanC-like protein 3 isoform 1	0.136072	1.35284	0.067	0.489	0.267	0.178	0.6	0.4	0.833	0.167	0.333	0.667	0.769	0.231	0.143	0.514	0.314	0.029	0.4	0.6	0.143	0.429	0.429	0.316	0.684	0.02	0.265	0.49	0.122	0	0.102	1	0.667	0.333	0.294	0.235	0.294	0.176	0.158	0.842	0.1	0.05	0.1	0.45	0.3	0	0.19
lcl|NM_198564.3_cds_NP_940966.2_1	DNAH12	dynein heavy chain 12, axonemal isoform 2	0.122303	1.1989	0.55	0.15	0	0.3	0.25	0.75	0.31	0.69	0.762	0.238	0.188	0.812	0.375	0.125	0.125	0.375	0.4	0.6	0.5	0.045	0.455	0.571	0.429	0.145	0.091	0.2	0.164	0.218	0.182	1	0.333	0.667	0.429	0.107	0	0.464	0.45	0.55	0.706	0.176	0.059	0	0.059	0	0.148
lcl|NM_198578.4_cds_NP_940980.4_1	LRRK2	leucine-rich repeat serine/threonine-protein kinase 2	0.0565477	0.542064	0.339	0.236	0.063	0.362	0.344	0.656	0.301	0.699	0.652	0.348	0.25	0.75	0.454	0.193	0.151	0.202	0.38	0.62	0.287	0.194	0.519	0.653	0.347	0.09	0.118	0.197	0.171	0.219	0.205	1	0.266	0.734	0.362	0.17	0	0.468	0.419	0.581	0.4	0.2	0.2	0.057	0.048	0.095	0.151
lcl|NM_198843.3_cds_NP_942140.3_1	SFTPB	pulmonary surfactant-associated protein B isoform 1 precursor	0.12574	1.19121	0.111	0.556	0.111	0.222	0.72	0.28	0.8	0.2	0.158	0.842	0.857	0.143	0.136	0.5	0.318	0.045	0.8	0.2	0.077	0.692	0.231	0.182	0.818	0.069	0.276	0.552	0.052	0	0.052	1	1	0	0.212	0.424	0.061	0.303	0.219	0.781	0.062	0.375	0.062	0.25	0.25	0	0.3
lcl|NM_199280.4_cds_NP_954974.2_1	TOGARAM2	TOG array regulator of axonemal microtubules protein 2 isoform 1	0.100296	0.945983	0.128	0.535	0.151	0.186	0.75	0.25	0.659	0.341	0.203	0.797	0.526	0.474	0.171	0.4	0.329	0.1	0.889	0.111	0.027	0.865	0.108	0.145	0.855	0.021	0.257	0.464	0.093	0.029	0.136	1	0.75	0.25	0.169	0.377	0.117	0.338	0.102	0.898	0.152	0.316	0.051	0.165	0.253	0.063	0.303
lcl|NM_199286.4_cds_NP_954980.1_1	DPPA3	developmental pluripotency-associated protein 3	0.158672	1.57235	0.429	0.143	0	0.429	0.667	0.333	0.5	0.5	0.643	0.357	0.667	0.333	0.556	0.111	0.333	0	0	1	0.333	0.667	0	0.125	0.875	0.067	0.267	0.067	0.2	0.133	0.267	1	0.444	0.556	0.667	0.083	0	0.25	0.5	0.5	0.6	0.133	0.067	0	0.067	0.133	0.1
lcl|NM_201623.4_cds_NP_963917.2_1	CLEC12A	C-type lectin domain family 12 member A isoform 2	0.133915	1.27685	0.364	0.455	0	0.182	0.125	0.875	0.375	0.625	0.611	0.389	0.4	0.6	0.333	0.167	0.167	0.333	0.75	0.25	0.5	0.312	0.188	0.7	0.3	0.263	0.105	0.211	0.105	0.158	0.158	1	0.579	0.421	0.5	0	0	0.5	0.538	0.462	0.583	0.25	0	0	0	0.167	0.143
lcl|NM_206818.2_cds_NP_996554.2_1	OSCAR	osteoclast-associated immunoglobulin-like receptor isoform 1 precursor	0.134443	1.29298	0.074	0.556	0.185	0.185	0.833	0.167	0.556	0.444	0.154	0.846	0.75	0.25	0.364	0.273	0.182	0.182	1	0	0.167	0.667	0.167	0	1	0.03	0.182	0.697	0.061	0	0.03	1	1	0	0.209	0.372	0.186	0.233	0.154	0.846	0.167	0.111	0.056	0.389	0.278	0	0.292
lcl|NM_206961.4_cds_NP_996844.1_1	LTK	leukocyte tyrosine kinase receptor isoform 2 precursor	0.105742	1.02657	0.119	0.559	0.186	0.136	0.783	0.217	0.63	0.37	0.216	0.784	0.65	0.35	0.156	0.375	0.385	0.083	0.765	0.235	0.083	0.625	0.292	0.263	0.737	0.02	0.24	0.6	0.07	0	0.07	1	0.647	0.353	0.229	0.3	0.2	0.271	0.111	0.889	0.12	0.2	0.12	0.22	0.32	0.02	0.324
lcl|NM_207007.3_cds_NP_996890.1_1	CCL4L1	C-C motif chemokine 4-like precursor	0.160974	1.49143	0.25	0.25	0.125	0.375	1	0	0.75	0.25	0.25	0.75	0.5	0.5	0	1	0	0	0	0	0	0	0	0.25	0.75	0.182	0.455	0.273	0.091	0	0	1	1	0	0.333	0.333	0	0.333	0.5	0.5	0.333	0.333	0	0.333	0	0	0.2
lcl|NM_207361.6_cds_NP_997244.4_1	FREM2	FRAS1-related extracellular matrix protein 2 precursor	0.0491637	0.478162	0.277	0.314	0.075	0.333	0.69	0.31	0.475	0.525	0.493	0.507	0.452	0.548	0.234	0.356	0.225	0.185	0.443	0.557	0.229	0.411	0.36	0.523	0.477	0.091	0.181	0.372	0.104	0.07	0.181	1	0.538	0.462	0.229	0.343	0.08	0.348	0.26	0.74	0.263	0.144	0.114	0.21	0.156	0.114	0.224
lcl|NM_207363.3_cds_NP_997246.2_1	NCKAP5	nck-associated protein 5 isoform 1	0.0731282	0.697424	0.279	0.346	0.048	0.327	0.594	0.406	0.472	0.528	0.556	0.444	0.459	0.541	0.312	0.266	0.321	0.101	0.578	0.422	0.185	0.426	0.389	0.547	0.453	0.152	0.165	0.232	0.177	0.104	0.171	1	0.348	0.652	0.352	0.29	0.049	0.309	0.386	0.614	0.292	0.398	0.115	0.106	0.044	0.044	0.197
lcl|NM_207437.3_cds_NP_997320.2_1	DNAH10	dynein heavy chain 10, axonemal isoform 1	0.0371787	0.357488	0.226	0.403	0.105	0.266	0.625	0.375	0.55	0.45	0.44	0.56	0.505	0.495	0.283	0.311	0.251	0.155	0.612	0.388	0.173	0.458	0.368	0.442	0.558	0.06	0.172	0.451	0.126	0.066	0.126	1	0.543	0.457	0.264	0.305	0.109	0.322	0.272	0.728	0.214	0.258	0.113	0.149	0.218	0.048	0.198
lcl|NM_207481.4_cds_NP_997364.3_1	NCKAP5	nck-associated protein 5 isoform 2	0.130198	1.25299	0.306	0.333	0.028	0.333	0.556	0.444	0.485	0.515	0.477	0.523	0.375	0.625	0.5	0.143	0.25	0.107	0.571	0.429	0.25	0.417	0.333	0.581	0.419	0.159	0.145	0.188	0.217	0.043	0.246	1	0.35	0.65	0.417	0.167	0.042	0.375	0.341	0.659	0.311	0.267	0.2	0.111	0.022	0.089	0.236
lcl|NM_213600.4_cds_NP_998765.3_1	PLA2G4F	cytosolic phospholipase A2 zeta precursor	0.101504	0.955108	0.193	0.491	0.035	0.281	0.733	0.267	0.9	0.1	0.183	0.817	0.571	0.429	0.131	0.475	0.279	0.115	0.941	0.059	0.095	0.714	0.19	0.111	0.889	0.059	0.269	0.521	0.042	0	0.109	1	0.909	0.091	0.25	0.446	0.036	0.268	0.137	0.863	0.102	0.306	0.122	0.143	0.265	0.061	0.279
lcl|XM_003265481.2_cds_XP_003265529.1_1	OLR1	oxidized low-density lipoprotein receptor 1 isoform X3	0.148187	1.41265	0.308	0.154	0	0.538	0.667	0.333	0.429	0.571	0.571	0.429	0.429	0.571	0.545	0.091	0.273	0.091	0.75	0.25	0.167	0.333	0.5	0.538	0.462	0.24	0.12	0.32	0.28	0.04	0	1	0.222	0.778	0.5	0.333	0	0.167	0.421	0.579	0.25	0	0	0	0.75	0	0.071
lcl|XM_004043609.3_cds_XP_004043657.1_1	SFTA2	surfactant-associated protein 2	0.147977	1.35882	1	0	0	0	1	0	0	0	0.5	0.5	0.5	0.5	0.143	0.143	0.571	0.143	0.333	0.667	0	0	0	0	1	0	0.45	0.25	0.15	0	0.15	1	0.5	0.5	0	0.333	0.333	0.333	1	0	1	0	0	0	0	0	0.273
lcl|XM_004049658.3_cds_XP_004049706.1_1	LOC101136905	pulmonary surfactant-associated protein A2-like isoform X5	0.160879	1.47345	0.3	0.45	0.1	0.15	0.5	0.5	0.75	0.25	0.118	0.882	0.833	0.167	0.36	0.24	0.24	0.16	0.333	0.667	0.125	0.5	0.375	0.167	0.833	0.071	0.357	0.5	0	0	0.071	1	0.5	0.5	0.375	0.188	0	0.438	0.222	0.778	0.286	0.286	0.143	0.143	0.071	0.071	0.3
lcl|XM_004058953.3_cds_XP_004059001.2_1	IL7R	interleukin-7 receptor subunit alpha	0.142016	1.36553	0.294	0.235	0	0.471	0.538	0.462	0.44	0.56	0.645	0.355	0.435	0.565	0.435	0.174	0.261	0.13	0.5	0.5	0.25	0.375	0.375	0.414	0.586	0.132	0.151	0.321	0.132	0.132	0.132	1	0.238	0.762	0.261	0.217	0.13	0.391	0.478	0.522	0.333	0.4	0.067	0.067	0	0.133	0.217
lcl|XM_004060050.3_cds_XP_004060098.1_1	ACP5	tartrate-resistant acid phosphatase type 5	0.127128	1.17186	0.071	0.679	0.107	0.143	0.667	0.333	0.789	0.211	0.167	0.833	0.647	0.353	0.087	0.391	0.304	0.217	0.909	0.091	0.091	0.727	0.182	0.2	0.8	0.143	0.114	0.629	0.057	0	0.057	1	0.385	0.615	0.176	0.529	0.059	0.235	0.231	0.769	0	0.25	0.1	0.4	0.25	0	0.19
lcl|XM_004064667.2_cds_XP_004064715.1_1	PIH1D3	protein PIH1D3	0.134128	1.29067	0.222	0.444	0	0.333	0.333	0.667	0.333	0.667	0.677	0.323	0.667	0.333	0.5	0	0.2	0.3	0	0	0.211	0.368	0.421	0.5	0.5	0.111	0.111	0.167	0.278	0.111	0.222	1	0.154	0.846	0.417	0.083	0	0.5	0.375	0.625	0.75	0	0	0	0	0.25	0.059
lcl|XM_005246794.4_cds_XP_005246851.1_1	SLC11A1	natural resistance-associated macrophage protein 1 isoform X4	0.116362	1.08348	0.109	0.609	0.152	0.13	0.667	0.333	0.818	0.182	0.286	0.714	0.714	0.286	0.156	0.594	0.188	0.062	1	0	0.103	0.69	0.207	0.333	0.667	0.03	0.343	0.493	0.09	0	0.045	1	0.8	0.2	0.062	0.688	0.125	0.125	0	1	0.056	0.111	0.222	0.222	0.278	0.111	0.346
lcl|XM_005248299.4_cds_XP_005248356.1_1	IL7R	interleukin-7 receptor subunit alpha isoform X1	0.162351	1.55185	0.333	0.222	0	0.444	0.5	0.5	0.5	0.5	0.632	0.368	0.4	0.6	0.538	0.308	0.077	0.077	0.8	0.2	0.375	0.375	0.25	0.5	0.5	0.192	0.154	0.308	0.038	0.192	0.115	1	0.286	0.714	0.444	0	0.222	0.333	0.6	0.4	0.556	0.111	0.111	0.111	0.111	0	0.217
lcl|XM_005260139.2_cds_XP_005260196.1_1	F2RL3	proteinase-activated receptor 4 isoform X1	0.108055	0.995053	0.109	0.587	0.217	0.087	0.857	0.143	0.667	0.333	0.333	0.667	1	0	0.056	0.556	0.278	0.111	0.778	0.222	0	1	0	0	1	0	0.179	0.768	0.018	0	0.036	1	1	0	0	0.643	0.357	0	0.286	0.714	0	0.095	0	0.381	0.429	0.095	0.45
lcl|XM_005264488.4_cds_XP_005264545.2_1	SFTPB	pulmonary surfactant-associated protein B isoform X2	0.121657	1.14992	0.111	0.556	0.111	0.222	0.72	0.28	0.8	0.2	0.158	0.842	0.857	0.143	0.095	0.524	0.333	0.048	0.8	0.2	0.077	0.692	0.231	0.182	0.818	0.069	0.276	0.552	0.052	0	0.052	1	1	0	0.219	0.438	0.031	0.312	0.219	0.781	0.125	0.312	0.062	0.25	0.25	0	0.316
lcl|XM_005265439.2_cds_XP_005265496.1_1	VIPR1	vasoactive intestinal polypeptide receptor 1 isoform X3	0.128991	1.23123	0.077	0.615	0.077	0.231	0.692	0.308	0.692	0.308	0.231	0.769	0.724	0.276	0.062	0.625	0.156	0.156	0.875	0.125	0.111	0.741	0.148	0.2	0.8	0.022	0.304	0.5	0.065	0	0.109	1	0.7	0.3	0.211	0.368	0.158	0.263	0.25	0.75	0	0.32	0.04	0.32	0.28	0.04	0.314
lcl|XM_005265581.4_cds_XP_005265638.1_1	CACNA2D2	voltage-dependent calcium channel subunit alpha-2/delta-2 isoform X2	0.0939272	0.879176	0.157	0.542	0.096	0.205	0.714	0.286	0.667	0.333	0.129	0.871	0.755	0.245	0.13	0.623	0.159	0.087	0.9	0.1	0.05	0.725	0.225	0.137	0.863	0.075	0.2	0.6	0.058	0.017	0.05	1	0.783	0.217	0.101	0.42	0.261	0.217	0.1	0.9	0.123	0.215	0.062	0.277	0.246	0.077	0.377
lcl|XM_005268629.4_cds_XP_005268686.1_1	LRRK2	leucine-rich repeat serine/threonine-protein kinase 2 isoform X1	0.0567242	0.543741	0.339	0.236	0.063	0.362	0.344	0.656	0.301	0.699	0.652	0.348	0.25	0.75	0.458	0.195	0.153	0.195	0.38	0.62	0.287	0.194	0.519	0.655	0.345	0.09	0.118	0.197	0.171	0.219	0.205	1	0.266	0.734	0.362	0.17	0	0.468	0.417	0.583	0.4	0.2	0.2	0.057	0.048	0.095	0.151
lcl|XM_005269938.4_cds_XP_005269995.1_1	CRTAC1	cartilage acidic protein 1 isoform X3	0.120608	1.12812	0.064	0.596	0.106	0.234	0.692	0.308	0.735	0.265	0.212	0.788	0.724	0.276	0.161	0.419	0.306	0.113	0.545	0.455	0	0.84	0.16	0.167	0.833	0.02	0.347	0.449	0.082	0.02	0.082	1	0.59	0.41	0.152	0.515	0.091	0.242	0.143	0.857	0.093	0.093	0.093	0.256	0.395	0.07	0.333
lcl|XM_006712711.4_cds_XP_006712774.1_1	SLC11A1	natural resistance-associated macrophage protein 1 isoform X6	0.116558	1.07536	0.091	0.614	0.159	0.136	0.75	0.25	0.8	0.2	0.308	0.692	0.714	0.286	0.161	0.581	0.194	0.065	1	0	0.111	0.704	0.185	0.333	0.667	0.016	0.333	0.508	0.095	0	0.048	1	0.8	0.2	0.067	0.667	0.133	0.133	0	1	0.062	0.125	0.188	0.188	0.312	0.125	0.391
lcl|XM_006715593.3_cds_XP_006715656.1_1	VNN2	vascular non-inflammatory molecule 2 isoform X1	0.140378	1.35855	0.4	0.2	0.04	0.36	0.417	0.583	0.529	0.471	0.5	0.5	0.414	0.586	0.5	0.133	0.2	0.167	0.231	0.769	0.348	0.261	0.391	0.545	0.455	0.122	0.102	0.224	0.245	0.122	0.184	1	0.345	0.655	0.346	0.192	0.077	0.385	0.5	0.5	0.333	0.333	0.111	0	0.056	0.167	0.192
lcl|XM_006718097.4_cds_XP_006718160.1_1	LOC102724488	synaptotagmin-15 isoform X7	0.12436	1.16588	0.16	0.48	0.04	0.32	0.727	0.273	0.684	0.316	0.12	0.88	0.632	0.368	0.125	0.458	0.417	0	0.778	0.222	0	0.8	0.2	0.211	0.789	0.019	0.192	0.692	0.038	0	0.058	1	0.778	0.222	0.32	0.44	0.12	0.12	0.211	0.789	0.136	0.318	0.045	0.136	0.273	0.091	0.379
lcl|XM_007998166.1_cds_XP_007996357.1_1	LOC103235318	CCAAT/enhancer-binding protein alpha-like	0.12707	1.21316	0.05	0.6	0.1	0.25	0.5	0.5	0.8	0.2	0.182	0.818	0.714	0.286	0.2	0.2	0.333	0.267	0.5	0.5	0	0.5	0.5	0	1	0	0.36	0.6	0.04	0	0	1	1	0	0.194	0.611	0.111	0.083	0.143	0.857	0.118	0.235	0.059	0.118	0.412	0.059	0.176
lcl|XM_008977244.1_cds_XP_008975492.1_1	SFTPC	pulmonary surfactant-associated protein C isoform X1	0.139691	1.30126	0.211	0.474	0.105	0.211	1	0	0.667	0.333	0.2	0.8	0.5	0.5	0.19	0.429	0.238	0.143	0.889	0.111	0.111	0.556	0.333	0.5	0.5	0	0.286	0.476	0.19	0	0.048	1	0.5	0.5	0.167	0.5	0.167	0.167	0.273	0.727	0.273	0.364	0.091	0.182	0.091	0	0.588
lcl|XM_009425368.3_cds_XP_009423643.1_1	ACVRL1	serine/threonine-protein kinase receptor R3 isoform X3	0.131608	1.25538	0.13	0.435	0.174	0.261	0.75	0.25	0.789	0.211	0.13	0.87	0.636	0.364	0.071	0.643	0.214	0.071	0.824	0.176	0	0.778	0.222	0.294	0.706	0.087	0.217	0.522	0.043	0	0.13	1	0.875	0.125	0.24	0.4	0.16	0.2	0.067	0.933	0.138	0.207	0.034	0.241	0.379	0	0.308
lcl|XM_009446973.3_cds_XP_009445248.2_1	LIPH	lipase member H isoform X4	0.151039	1.43621	0.4	0.2	0.05	0.35	0.583	0.417	0.5	0.5	0.562	0.438	0.474	0.526	0.478	0.217	0.217	0.087	0.4	0.6	0.211	0.316	0.474	0.571	0.429	0.122	0.073	0.293	0.146	0.098	0.268	1	0.467	0.533	0.333	0.2	0.067	0.4	0.417	0.583	0.391	0.478	0.087	0	0.043	0	0.133
lcl|XM_011509477.2_cds_XP_011507779.1_1	CCDC190	coiled-coil domain-containing protein 190 isoform X1	0.14234	1.36603	0.3	0.4	0	0.3	0.571	0.429	0.357	0.643	0.391	0.609	0.6	0.4	0.5	0.188	0.25	0.062	0.444	0.556	0.5	0.125	0.375	0.382	0.618	0.074	0.259	0.185	0.111	0.037	0.333	1	0.4	0.6	0.524	0.19	0	0.286	0.52	0.48	0.429	0.476	0	0	0.048	0.048	0.214
lcl|XM_011511014.2_cds_XP_011509316.1_1	RUFY4	RUN and FYVE domain-containing protein 4 isoform X2	0.121185	1.12986	0.233	0.535	0	0.233	0.684	0.316	0.696	0.304	0.259	0.741	0.538	0.462	0.283	0.152	0.543	0.022	0.6	0.4	0.067	0.8	0.133	0.241	0.759	0.046	0.262	0.477	0.138	0	0.077	1	0.571	0.429	0.393	0.429	0	0.179	0.193	0.807	0.245	0.327	0.041	0.122	0.204	0.061	0.27
lcl|XM_011511411.3_cds_XP_011509713.1_1	ACOXL	acyl-coenzyme A oxidase-like protein isoform X4	0.138508	1.33469	0.241	0.407	0.111	0.241	0.455	0.545	0.467	0.533	0.467	0.533	0.286	0.714	0.359	0.103	0.282	0.256	0.571	0.429	0.28	0.4	0.32	0.25	0.75	0.032	0.177	0.452	0.065	0.113	0.161	1	0.55	0.45	0.318	0.182	0.182	0.318	0.2	0.8	0.211	0.237	0.079	0.132	0.289	0.053	0.31
lcl|XM_011511419.2_cds_XP_011509721.1_1	ACOXL	acyl-coenzyme A oxidase-like protein isoform X9	0.137774	1.31845	0.234	0.426	0.085	0.255	0.5	0.5	0.5	0.5	0.4	0.6	0.308	0.692	0.343	0.086	0.343	0.229	0.571	0.429	0.318	0.318	0.364	0.29	0.71	0.034	0.155	0.5	0.052	0.103	0.155	1	0.529	0.471	0.25	0.312	0.062	0.375	0.231	0.769	0.273	0.273	0.061	0.121	0.212	0.061	0.423
lcl|XM_011511421.2_cds_XP_011509723.1_1	ACOXL	acyl-coenzyme A oxidase-like protein isoform X10	0.139831	1.33706	0.213	0.404	0.106	0.277	0.5	0.5	0.458	0.542	0.481	0.519	0.269	0.731	0.3	0.125	0.3	0.275	0.615	0.385	0.318	0.318	0.364	0.286	0.714	0.019	0.17	0.528	0.075	0.075	0.132	1	0.556	0.444	0.286	0.286	0.071	0.357	0.261	0.739	0.29	0.226	0.097	0.129	0.194	0.065	0.346
lcl|XM_011512082.2_cds_XP_011510384.1_1	MARCO	macrophage receptor MARCO isoform X1	0.118137	1.11443	0.244	0.293	0.073	0.39	0.833	0.167	0.632	0.368	0.357	0.643	0.8	0.2	0.376	0.229	0.202	0.193	0.7	0.3	0	0.455	0.545	0.485	0.515	0.026	0.237	0.553	0.079	0	0.105	1	0.385	0.615	0.386	0.159	0.114	0.341	0.559	0.441	0.238	0.286	0.143	0.095	0.238	0	0.333
lcl|XM_011512428.3_cds_XP_011510730.1_1	COL6A6	collagen alpha-6(VI) chain isoform X3	0.0627653	0.590402	0.248	0.349	0.047	0.356	0.621	0.379	0.431	0.569	0.52	0.48	0.413	0.587	0.439	0.252	0.152	0.157	0.646	0.354	0.271	0.391	0.338	0.467	0.533	0.056	0.156	0.339	0.222	0.083	0.144	1	0.5	0.5	0.37	0.296	0.037	0.296	0.337	0.663	0.355	0.198	0.107	0.074	0.19	0.074	0.253
lcl|XM_011512531.3_cds_XP_011510833.1_1	LIPH	lipase member H isoform X3	0.147307	1.39519	0.35	0.2	0.1	0.35	0.545	0.455	0.467	0.533	0.467	0.533	0.444	0.556	0.467	0.3	0.2	0.033	0.364	0.636	0.286	0.286	0.429	0.583	0.417	0.098	0.122	0.244	0.146	0.146	0.244	1	0.529	0.471	0.318	0.227	0.045	0.409	0.467	0.533	0.4	0.45	0.1	0	0.05	0	0.115
lcl|XM_011512621.2_cds_XP_011510923.1_1	COL6A5	collagen alpha-5(VI) chain isoform X1	0.0546963	0.512183	0.307	0.27	0.044	0.38	0.333	0.667	0.396	0.604	0.656	0.344	0.341	0.659	0.418	0.219	0.207	0.156	0.345	0.655	0.217	0.404	0.379	0.591	0.409	0.109	0.159	0.259	0.2	0.132	0.141	1	0.4	0.6	0.425	0.151	0.019	0.406	0.476	0.524	0.423	0.252	0.106	0.049	0.098	0.073	0.237
lcl|XM_011513135.2_cds_XP_011511437.1_1	VEPH1	ventricular zone-expressed PH domain-containing protein homolog 1 isoform X3	0.110791	1.05536	0.44	0.28	0	0.28	0.714	0.286	0.622	0.378	0.697	0.303	0.5	0.5	0.312	0.281	0.219	0.188	0.318	0.682	0.232	0.411	0.357	0.5	0.5	0.075	0.275	0.35	0.1	0.05	0.15	1	0.486	0.514	0.382	0.176	0.029	0.412	0.386	0.614	0.514	0.27	0.054	0.108	0.054	0	0.259
lcl|XM_011514696.2_cds_XP_011512998.1_1	TREM1	triggering receptor expressed on myeloid cells 1 isoform X1	0.1581	1.52798	0.222	0.333	0	0.444	0.4	0.6	0.364	0.636	0.533	0.467	0.375	0.625	0.308	0.154	0.385	0.154	0.375	0.625	0.333	0.583	0.083	0.353	0.647	0.083	0.208	0.417	0.083	0.083	0.125	1	0.286	0.714	0.263	0.263	0	0.474	0.333	0.667	0.133	0.467	0.133	0.2	0.067	0	0.211
lcl|XM_011515131.2_cds_XP_011513433.1_1	ABCA13	ATP-binding cassette sub-family A member 13 isoform X2	0.0289796	0.2802	0.266	0.318	0.052	0.365	0.458	0.542	0.415	0.585	0.624	0.376	0.395	0.605	0.316	0.278	0.206	0.201	0.42	0.58	0.316	0.272	0.411	0.576	0.424	0.076	0.139	0.257	0.187	0.141	0.199	1	0.398	0.602	0.333	0.257	0.07	0.339	0.455	0.545	0.357	0.266	0.084	0.097	0.104	0.091	0.157
lcl|XM_011515132.2_cds_XP_011513434.1_1	ABCA13	ATP-binding cassette sub-family A member 13 isoform X3	0.0287299	0.277155	0.262	0.322	0.052	0.365	0.463	0.537	0.421	0.579	0.624	0.376	0.401	0.599	0.319	0.281	0.2	0.2	0.424	0.576	0.318	0.27	0.412	0.58	0.42	0.078	0.138	0.257	0.188	0.141	0.199	1	0.396	0.604	0.331	0.254	0.071	0.343	0.453	0.547	0.348	0.297	0.084	0.09	0.097	0.084	0.153
lcl|XM_011515136.2_cds_XP_011513438.2_1	ABCA13	ATP-binding cassette sub-family A member 13 isoform X6	0.030201	0.292002	0.261	0.319	0.053	0.367	0.474	0.526	0.421	0.579	0.625	0.375	0.398	0.602	0.319	0.289	0.196	0.196	0.444	0.556	0.319	0.268	0.413	0.577	0.423	0.076	0.138	0.255	0.185	0.142	0.204	1	0.388	0.612	0.35	0.244	0.062	0.344	0.451	0.549	0.345	0.283	0.076	0.103	0.11	0.083	0.15
lcl|XM_011515958.2_cds_XP_011514260.1_1	CDHR3	cadherin-related family member 3 isoform X11	0.13386	1.27322	0.357	0.393	0.036	0.214	0.8	0.2	0.469	0.531	0.65	0.35	0.448	0.552	0.25	0.225	0.225	0.3	0.667	0.333	0.212	0.364	0.424	0.4	0.6	0.192	0.308	0.231	0.058	0.077	0.135	1	0.562	0.438	0.39	0.22	0.049	0.341	0.4	0.6	0.414	0.207	0.103	0.069	0	0.207	0.275
lcl|XM_011521682.1_cds_XP_011519984.1_1	DUOX1	dual oxidase 1 isoform X2	0.0945029	0.880986	0.18	0.492	0.082	0.246	0.5	0.5	0.755	0.245	0.2	0.8	0.688	0.312	0.208	0.444	0.306	0.042	0.763	0.237	0	0.839	0.161	0.091	0.909	0.021	0.271	0.569	0.056	0.021	0.062	1	0.6	0.4	0.15	0.533	0.05	0.267	0.089	0.911	0.106	0.16	0.064	0.255	0.351	0.064	0.302
lcl|XM_011523828.3_cds_XP_011522130.1_1	ITGAE	integrin alpha-E isoform X5	0.0990674	0.948922	0.167	0.478	0.144	0.211	0.48	0.52	0.534	0.466	0.346	0.654	0.58	0.42	0.247	0.365	0.224	0.165	0.562	0.438	0.122	0.653	0.224	0.378	0.622	0.033	0.285	0.431	0.106	0.041	0.106	1	0.667	0.333	0.262	0.524	0.024	0.19	0.151	0.849	0.2	0.233	0.033	0.233	0.233	0.067	0.363
lcl|XM_011525491.2_cds_XP_011523793.1_1	TBX4	T-box transcription factor TBX4 isoform X2	0.118867	1.15705	0.125	0.542	0.167	0.167	0.556	0.444	0.696	0.304	0.114	0.886	0.667	0.333	0.227	0.318	0.364	0.091	0.773	0.227	0	0.706	0.294	0.226	0.774	0.041	0.347	0.531	0.02	0.041	0.02	1	0.714	0.286	0.164	0.475	0.213	0.148	0.138	0.862	0.129	0.355	0.161	0.097	0.194	0.065	0.271
lcl|XM_011526554.3_cds_XP_011524856.1_1	CYP2F1	cytochrome P450 2F1 isoform X5	0.136135	1.31841	0.143	0.524	0.238	0.095	0.8	0.2	0.731	0.269	0.045	0.955	0.7	0.3	0.12	0.52	0.24	0.12	0.778	0.222	0.038	0.692	0.269	0.176	0.824	0.067	0.311	0.444	0.111	0	0.067	1	0.571	0.429	0.154	0.462	0.154	0.231	0.381	0.619	0.179	0.143	0.071	0.393	0.179	0.036	0.314
lcl|XM_011527171.2_cds_XP_011525473.1_1	PRX	periaxin isoform X1	0.0768507	0.728226	0.205	0.397	0.064	0.333	0.667	0.333	0.593	0.407	0.176	0.824	0.516	0.484	0.114	0.303	0.439	0.144	0.636	0.364	0.111	0.667	0.222	0.307	0.693	0.053	0.257	0.5	0.132	0.007	0.053	1	1	0	0.249	0.412	0.136	0.203	0.104	0.896	0.048	0.217	0.145	0.12	0.386	0.084	0.184
lcl|XM_011534243.2_cds_XP_011532545.1_1	CACNA2D2	voltage-dependent calcium channel subunit alpha-2/delta-2 isoform X1	0.0938905	0.879555	0.157	0.542	0.096	0.205	0.714	0.286	0.657	0.343	0.129	0.871	0.755	0.245	0.13	0.623	0.159	0.087	0.9	0.1	0.049	0.732	0.22	0.151	0.849	0.074	0.197	0.598	0.057	0.016	0.057	1	0.783	0.217	0.114	0.414	0.257	0.214	0.1	0.9	0.123	0.215	0.062	0.277	0.246	0.077	0.387
lcl|XM_011536055.2_cds_XP_011534357.1_1	ROS1	proto-oncogene tyrosine-protein kinase ROS isoform X10	0.0718896	0.676981	0.347	0.214	0.051	0.388	0.314	0.686	0.414	0.586	0.647	0.353	0.262	0.738	0.415	0.234	0.17	0.181	0.632	0.368	0.208	0.317	0.475	0.529	0.471	0.107	0.137	0.244	0.202	0.179	0.131	1	0.323	0.677	0.413	0.183	0.038	0.365	0.5	0.5	0.426	0.295	0.082	0.066	0.098	0.033	0.136
lcl|XM_011537882.3_cds_XP_011536184.1_1	LRRK2	leucine-rich repeat serine/threonine-protein kinase 2 isoform X8	0.0816071	0.785134	0.373	0.224	0.134	0.269	0.333	0.667	0.213	0.787	0.596	0.404	0.275	0.725	0.51	0.176	0.118	0.196	0.261	0.739	0.293	0.213	0.493	0.682	0.318	0.099	0.099	0.241	0.131	0.241	0.188	1	0.271	0.729	0.368	0.184	0	0.447	0.375	0.625	0.395	0.316	0.158	0.026	0.026	0.079	0.15
lcl|XM_011539746.3_cds_XP_011538048.1_1	FFAR4	free fatty acid receptor 4 isoform X1	0.131864	1.27014	0.111	0.407	0.407	0.074	1	0	0.833	0.167	0.375	0.625	0.75	0.25	0.154	0.692	0.077	0.077	1	0	0	0.571	0.429	0.667	0.333	0	0.237	0.658	0	0.026	0.079	1	1	0	0.083	0.417	0.083	0.417	0.4	0.6	0	0.05	0.15	0.45	0.35	0	0.357
lcl|XM_011540087.1_cds_XP_011538389.1_1	SFTPD	pulmonary surfactant-associated protein D isoform X1	0.132746	1.23707	0.333	0.25	0	0.417	0.5	0.5	0.538	0.462	0.32	0.68	0.8	0.2	0.356	0.247	0.247	0.151	1	0	0.25	0.25	0.5	0.304	0.696	0	0.25	0.5	0.071	0.036	0.143	1	0.5	0.5	0.41	0.256	0.026	0.308	0.25	0.75	0.286	0.214	0.071	0.143	0.143	0.143	0.091
lcl|XM_011546001.3_cds_XP_011544303.1_1	HS3ST2	heparan sulfate glucosamine 3-O-sulfotransferase 2 isoform X1	0.1496	1.48801	0.105	0.579	0.263	0.053	0.778	0.222	0.571	0.429	0.286	0.714	0.625	0.375	0	0.526	0.316	0.158	1	0	0	0.667	0.333	0.286	0.714	0	0.409	0.409	0.045	0	0.136	1	1	0	0.095	0.571	0.143	0.19	0.2	0.8	0.045	0.273	0.091	0.364	0.227	0	0.368
lcl|XM_011994443.1_cds_XP_011849833.1_1	ICAM1	intercellular adhesion molecule 1 isoform X2	0.130627	1.24587	0.25	0.472	0.083	0.194	0.462	0.538	0.533	0.467	0.242	0.758	0.7	0.3	0.194	0.333	0.389	0.083	1	0	0.273	0.636	0.091	0.3	0.7	0.074	0.241	0.519	0.056	0	0.111	1	0.625	0.375	0.271	0.458	0.125	0.146	0.206	0.794	0.125	0.125	0.083	0.167	0.417	0.083	0.258
lcl|XM_016923932.1_cds_XP_016779421.1_1	TSPAN19	putative tetraspanin-19 isoform X1	0.127007	1.23066	0.556	0.111	0	0.333	0.125	0.875	0.25	0.75	0.5	0.5	0.438	0.562	0.714	0.071	0	0.214	0.4	0.6	0.269	0.269	0.462	0.526	0.474	0.097	0.097	0.065	0.226	0.387	0.129	1	0.238	0.762	0.667	0	0	0.333	0.375	0.625	1	0	0	0	0	0	0
lcl|XM_016934910.2_cds_XP_016790399.2_1	FBN3	fibrillin-3 isoform X9	0.0622393	0.584294	0.162	0.556	0.077	0.204	0.593	0.407	0.602	0.398	0.205	0.795	0.721	0.279	0.091	0.55	0.24	0.12	0.84	0.16	0	0.75	0.25	0.289	0.711	0.031	0.267	0.565	0.094	0	0.042	1	0.698	0.302	0.156	0.416	0.133	0.295	0.132	0.868	0.043	0.153	0.098	0.294	0.325	0.086	0.396
lcl|XM_016942226.2_cds_XP_016797715.1_1	VEPH1	ventricular zone-expressed PH domain-containing protein homolog 1 isoform X6	0.114832	1.08617	0.422	0.267	0	0.311	0.75	0.25	0.613	0.387	0.689	0.311	0.485	0.515	0.323	0.323	0.129	0.226	0.368	0.632	0.265	0.347	0.388	0.5	0.5	0.079	0.263	0.368	0.092	0.053	0.145	1	0.484	0.516	0.424	0.182	0.03	0.364	0.405	0.595	0.485	0.303	0.061	0.121	0.03	0	0.283
lcl|XM_016953243.2_cds_XP_016808732.2_1	PCSK9	proprotein convertase subtilisin/kexin type 9 isoform X2	0.116072	1.10257	0.1	0.588	0.113	0.2	0.882	0.118	0.656	0.344	0.103	0.897	0.571	0.429	0.077	0.415	0.338	0.169	0.792	0.208	0.111	0.611	0.278	0.2	0.8	0.062	0.21	0.58	0.062	0	0.086	1	0.727	0.273	0.255	0.319	0.149	0.277	0.167	0.833	0.094	0.172	0.047	0.297	0.297	0.094	0.365
lcl|XM_016955846.1_cds_XP_016811335.1_1	ALPL	alkaline phosphatase, tissue-nonspecific isozyme isoform X2	0.128196	1.17858	0.104	0.583	0.146	0.167	0.667	0.333	0.893	0.107	0.167	0.833	0.846	0.154	0.098	0.488	0.293	0.122	0.792	0.208	0	0.706	0.294	0.333	0.667	0.023	0.233	0.558	0.093	0.047	0.047	1	0.652	0.348	0.091	0.636	0.045	0.227	0.154	0.846	0.167	0.222	0.111	0.167	0.222	0.111	0.31
lcl|XM_017003979.2_cds_XP_016859468.1_1	NCKAP5	nck-associated protein 5 isoform X5	0.126092	1.20781	0.29	0.355	0.032	0.323	0.556	0.444	0.4	0.6	0.513	0.487	0.5	0.5	0.458	0.125	0.333	0.083	0.571	0.429	0.231	0.385	0.385	0.632	0.368	0.156	0.13	0.156	0.208	0.078	0.273	1	0.407	0.593	0.375	0.167	0.042	0.417	0.372	0.628	0.326	0.261	0.196	0.109	0.022	0.087	0.205
lcl|XM_017005171.2_cds_XP_016860660.1_1	MARCO	macrophage receptor MARCO isoform X3	0.13735	1.28063	0.179	0.25	0.107	0.464	0	0	0.556	0.444	0.211	0.789	0.875	0.125	0.296	0.296	0.222	0.185	0.833	0.167	0.091	0.545	0.364	0.25	0.75	0.029	0.294	0.471	0.088	0	0.118	1	0.3	0.7	0.429	0.214	0.143	0.214	0.591	0.409	0.375	0.312	0.062	0.062	0.188	0	0.333
lcl|XM_017005852.2_cds_XP_016861341.1_1	LIPH	lipase member H isoform X2	0.14679	1.39098	0.4	0.2	0.05	0.35	0.538	0.462	0.5	0.5	0.529	0.471	0.5	0.5	0.517	0.241	0.172	0.069	0.4	0.6	0.286	0.286	0.429	0.565	0.435	0.109	0.087	0.261	0.13	0.109	0.304	1	0.471	0.529	0.368	0.211	0.053	0.368	0.462	0.538	0.391	0.478	0.087	0	0.043	0	0.133
lcl|XM_017008625.2_cds_XP_016864114.1_1	TNIP3	TNFAIP3-interacting protein 3 isoform X8	0.137453	1.3501	0.25	0.25	0.125	0.375	0.3	0.7	0.611	0.389	0.578	0.422	0.5	0.5	0.333	0.5	0	0.167	0.4	0.6	0.5	0.25	0.25	0.472	0.528	0.075	0.15	0.3	0.175	0.1	0.2	1	0.375	0.625	0.467	0.133	0.133	0.267	0.371	0.629	0.357	0.25	0.107	0.107	0.179	0	0.059
lcl|XM_017011409.1_cds_XP_016866898.1_1	VNN2	vascular non-inflammatory molecule 2 isoform X3	0.152471	1.47318	0.286	0.286	0	0.429	0.429	0.571	0.4	0.6	0.562	0.438	0.4	0.6	0.571	0.095	0.238	0.095	0	1	0.417	0.167	0.417	0.615	0.385	0.162	0.081	0.135	0.297	0.162	0.162	1	0.353	0.647	0.455	0.273	0	0.273	0.6	0.4	0.364	0.364	0.091	0	0.091	0.091	0.19
lcl|XM_017016985.2_cds_XP_016872474.1_1	SPOCK2	testican-2 isoform X2	0.104919	0.984393	0.125	0.75	0.125	0	1	0	1	0	0.2	0.8	1	0	0	0.714	0.286	0	1	0	0	1	0	0	1	0	0.222	0.778	0	0	0	1	0.5	0.5	0.286	0.429	0.286	0	0.333	0.667	0	0	0.25	0.5	0.25	0	0.143
lcl|XM_017018221.2_cds_XP_016873710.1_1	TRPC6	short transient receptor potential channel 6 isoform X2	0.115745	1.12346	0.355	0.274	0.048	0.323	0.818	0.182	0.447	0.553	0.701	0.299	0.565	0.435	0.357	0.286	0.167	0.19	0.412	0.588	0.302	0.151	0.547	0.593	0.407	0.081	0.186	0.256	0.209	0.14	0.128	1	0.341	0.659	0.333	0.2	0.2	0.267	0.233	0.767	0.268	0.268	0.049	0.098	0.268	0.049	0.188
lcl|XM_017021951.1_cds_XP_016877440.1_1	CTSH	pro-cathepsin H isoform X1	0.13922	1.34105	0.12	0.52	0.12	0.24	0.889	0.111	0.7	0.3	0.357	0.643	0.4	0.6	0.259	0.222	0.259	0.259	0.818	0.182	0.133	0.867	0	0.5	0.5	0	0.25	0.562	0.062	0	0.125	1	0.667	0.333	0.188	0.375	0	0.438	0.176	0.824	0.125	0.25	0.125	0.125	0.125	0.25	0.2
lcl|XM_017025712.1_cds_XP_016881201.1_1	GRP	gastrin-releasing peptide isoform X1	0.15272	1.39111	0.222	0.111	0.556	0.111	1	0	0.25	0.75	0.4	0.6	1	0	0.133	0.333	0.4	0.133	1	0	0.5	0.5	0	0.4	0.6	0	0.263	0.632	0	0.053	0.053	1	0.714	0.286	0.1	0.3	0.3	0.3	0.143	0.857	0.3	0.2	0.1	0.2	0.1	0.1	0.385
lcl|XM_017025713.1_cds_XP_016881202.1_1	GRP	gastrin-releasing peptide isoform X2	0.15961	1.48464	0.222	0.111	0.556	0.111	1	0	0	1	0.333	0.667	1	0	0.083	0.333	0.5	0.083	1	0	0.5	0.5	0	0.286	0.714	0	0.235	0.647	0	0.059	0.059	1	0.667	0.333	0.111	0.222	0.333	0.333	0.167	0.833	0.273	0.273	0.091	0.182	0.091	0.091	0.333
lcl|XM_017027373.1_cds_XP_016882862.1_1	FBN3	fibrillin-3 isoform X2	0.0622913	0.585156	0.168	0.577	0.074	0.181	0.596	0.404	0.609	0.391	0.21	0.79	0.75	0.25	0.091	0.548	0.243	0.117	0.795	0.205	0.014	0.75	0.236	0.282	0.718	0.026	0.265	0.571	0.095	0	0.042	1	0.7	0.3	0.161	0.431	0.132	0.276	0.142	0.858	0.037	0.144	0.1	0.325	0.331	0.062	0.407
lcl|XM_017027379.1_cds_XP_016882868.1_1	FBN3	fibrillin-3 isoform X8	0.0616732	0.582743	0.166	0.576	0.073	0.185	0.594	0.406	0.605	0.395	0.211	0.789	0.743	0.257	0.091	0.544	0.245	0.12	0.797	0.203	0.014	0.75	0.236	0.275	0.725	0.026	0.267	0.574	0.092	0	0.041	1	0.699	0.301	0.158	0.435	0.13	0.277	0.148	0.852	0.037	0.149	0.099	0.323	0.329	0.062	0.415
lcl|XM_017027512.1_cds_XP_016883001.1_1	NAPSA	napsin-A isoform X2	0.134961	1.28455	0.2	0.5	0.133	0.167	0.667	0.333	0.5	0.5	0.278	0.722	0.652	0.348	0.298	0.17	0.426	0.106	0.429	0.571	0.042	0.708	0.25	0	1	0.038	0.269	0.519	0.058	0	0.115	1	0.556	0.444	0.225	0.325	0.125	0.325	0.333	0.667	0.095	0.238	0.095	0.333	0.19	0.048	0.208
lcl|XM_017532732.1_cds_XP_017388221.1_1	CCDC141	coiled-coil domain-containing protein 141 isoform X6	0.0830333	0.799061	0.36	0.236	0.056	0.348	0.455	0.545	0.463	0.537	0.58	0.42	0.467	0.533	0.34	0.26	0.2	0.2	0.381	0.619	0.293	0.345	0.362	0.504	0.496	0.117	0.161	0.183	0.25	0.139	0.15	1	0.245	0.755	0.378	0.133	0.044	0.444	0.376	0.624	0.411	0.25	0.071	0.018	0.161	0.089	0.202
lcl|XM_019021772.2_cds_XP_018877317.1_1	CCL20	C-C motif chemokine 20 isoform X2	0.129668	1.2447	0.333	0.167	0	0.5	0.429	0.571	1	0	1	0	0.25	0.75	0.25	0.75	0	0	0.667	0.333	0	0.667	0.333	0.6	0.4	0.071	0.357	0.214	0.143	0	0.214	1	0.4	0.6	0.5	0	0	0.5	0	1	0	0	0	0	0.333	0.667	0.167
lcl|XM_019022275.2_cds_XP_018877820.1_1	SLC11A1	natural resistance-associated macrophage protein 1 isoform X1	0.121869	1.13787	0.075	0.585	0.17	0.17	0.7	0.3	0.812	0.188	0.222	0.778	0.758	0.242	0.149	0.532	0.191	0.128	0.818	0.182	0.088	0.706	0.206	0.286	0.714	0.047	0.318	0.459	0.094	0	0.082	1	0.8	0.2	0.172	0.448	0.172	0.207	0.125	0.875	0.091	0.136	0.182	0.182	0.273	0.136	0.472
lcl|XM_019023539.1_cds_XP_018879084.1_1	VIPR1	vasoactive intestinal polypeptide receptor 1 isoform X4	0.138861	1.34051	0.074	0.667	0.148	0.111	0.75	0.25	0.545	0.455	0.188	0.812	0.579	0.421	0.1	0.567	0.167	0.167	0.833	0.167	0.12	0.72	0.16	0.167	0.833	0.047	0.209	0.535	0.093	0	0.116	1	0.5	0.5	0.25	0.393	0.214	0.143	0.118	0.882	0	0.391	0.043	0.348	0.217	0	0.275
lcl|XM_019039450.2_cds_XP_018894995.2_1	DRAM1	DNA damage-regulated autophagy modulator protein 1	0.163282	1.61004	0.176	0.471	0.059	0.294	0.444	0.556	0.2	0.8	0.5	0.5	0.6	0.4	0.4	0.133	0.133	0.333	0.75	0.25	0.2	0.45	0.35	0.4	0.6	0.19	0.238	0.143	0.143	0.095	0.19	1	0.625	0.375	0.3	0.4	0.1	0.2	0.375	0.625	0.4	0.4	0	0	0.2	0	0.048
lcl|XM_023221309.3_cds_XP_023077077.2_1	HIVEP3	transcription factor HIVEP3	0.0604979	0.585426	0.229	0.503	0.057	0.21	0.562	0.438	0.696	0.304	0.343	0.657	0.66	0.34	0.182	0.403	0.314	0.101	0.667	0.333	0.078	0.686	0.235	0.439	0.561	0.04	0.233	0.421	0.124	0.04	0.144	1	0.76	0.24	0.262	0.37	0.13	0.238	0.176	0.824	0.18	0.288	0.101	0.194	0.194	0.043	0.251
lcl|XM_024244737.1_cds_XP_024100505.1_1	DNAH12	dynein heavy chain 12, axonemal isoform X2	0.0485384	0.468933	0.373	0.196	0.026	0.405	0.364	0.636	0.361	0.639	0.691	0.309	0.235	0.765	0.483	0.163	0.116	0.238	0.258	0.742	0.304	0.176	0.52	0.623	0.377	0.129	0.095	0.152	0.218	0.212	0.195	1	0.324	0.676	0.427	0.133	0.027	0.413	0.472	0.528	0.389	0.111	0.16	0.083	0.09	0.167	0.102
lcl|XM_024446690.1_cds_XP_024302458.1_1	CDHR3	cadherin-related family member 3 isoform X13	0.133744	1.27415	0.179	0.429	0.071	0.321	1	0	0.444	0.556	0.615	0.385	0.526	0.474	0.2	0.2	0.286	0.314	0.833	0.167	0.24	0.44	0.32	0.433	0.567	0.211	0.079	0.342	0.158	0.026	0.184	1	0.581	0.419	0.531	0.281	0.062	0.125	0.357	0.643	0.5	0.308	0.038	0.154	0	0	0.192
lcl|XM_024447290.1_cds_XP_024303058.1_1	DCSTAMP	dendritic cell-specific transmembrane protein isoform X3	0.153644	1.4901	0.421	0.316	0.053	0.211	0.364	0.636	0.429	0.571	0.5	0.5	0.278	0.722	0.143	0.476	0.143	0.238	0.286	0.714	0.095	0.429	0.476	0.455	0.545	0.143	0.143	0.262	0.262	0	0.19	1	0.5	0.5	0.444	0.333	0.111	0.111	0.182	0.818	0.25	0.5	0.167	0	0	0.083	0.208
lcl|XM_024448264.1_cds_XP_024304032.1_1	GPRIN2	G protein-regulated inducer of neurite outgrowth 2 isoform X2	0.119167	1.10188	0.095	0.413	0.143	0.349	0.692	0.308	0.615	0.385	0.2	0.8	0.333	0.667	0.07	0.419	0.279	0.233	0.5	0.5	0	1	0	0.3	0.7	0.091	0.114	0.636	0.068	0.023	0.068	1	0.5	0.5	0.238	0.357	0.143	0.262	0	1	0.036	0.321	0.071	0.179	0.357	0.036	0.404
lcl|XM_024448968.1_cds_XP_024304736.1_1	OVCH1	ovochymase-1 isoform X1	0.0982537	0.938444	0.333	0.281	0.018	0.368	0.225	0.775	0.444	0.556	0.586	0.414	0.318	0.682	0.409	0.194	0.151	0.247	0.459	0.541	0.254	0.31	0.437	0.478	0.522	0.151	0.094	0.283	0.142	0.151	0.179	1	0.459	0.541	0.426	0.206	0.044	0.324	0.5	0.5	0.633	0.163	0.041	0.041	0.061	0.061	0.136
lcl|XM_024449855.1_cds_XP_024305623.1_1	CTSH	pro-cathepsin H isoform X4	0.139637	1.29436	0.105	0.474	0.158	0.263	0.833	0.167	0.625	0.375	0.444	0.556	0.7	0.3	0.238	0.286	0.238	0.238	0.6	0.4	0	1	0	0.455	0.545	0	0.333	0.5	0	0.083	0.083	1	0.7	0.3	0.1	0.4	0	0.5	0.167	0.833	0.5	0	0	0.5	0	0	0.3
lcl|XM_024451005.1_cds_XP_024306773.1_1	CD101	immunoglobulin superfamily member 2 isoform X1	0.102886	0.972569	0.273	0.436	0	0.291	0.333	0.667	0.439	0.561	0.403	0.597	0.559	0.441	0.349	0.349	0.143	0.159	0.724	0.276	0.114	0.432	0.455	0.431	0.569	0.081	0.27	0.342	0.081	0.108	0.117	1	0.529	0.471	0.462	0.282	0.103	0.154	0.302	0.698	0.235	0.353	0.059	0.059	0.176	0.118	0.18
lcl|XM_024453750.1_cds_XP_024309518.1_1	VEPH1	ventricular zone-expressed PH domain-containing protein homolog 1 isoform X4	0.157148	1.49575	0.533	0.2	0	0.267	0.75	0.25	0.538	0.462	0.667	0.333	0.75	0.25	0.2	0.2	0.6	0	0.333	0.667	0.176	0.412	0.412	0.4	0.6	0	0.238	0.333	0.143	0.143	0.143	1	0.556	0.444	0.2	0.6	0	0.2	0.714	0.286	0.625	0.125	0.25	0	0	0	0.2
lcl|XM_024931249.1_cds_XP_024787017.1_1	ACVRL1	serine/threonine-protein kinase receptor R3 isoform X2	0.122086	1.15912	0.133	0.567	0.1	0.2	0.765	0.235	0.76	0.24	0.138	0.862	0.714	0.286	0.116	0.535	0.256	0.093	0.762	0.238	0	0.882	0.118	0.286	0.714	0.049	0.131	0.639	0.049	0	0.131	1	0.857	0.143	0.12	0.44	0.2	0.24	0.048	0.952	0.143	0.257	0.029	0.2	0.314	0.057	0.27
lcl|XM_025401808.1_cds_XP_025257593.1_1	WIF1	wnt inhibitory factor 1 isoform X2	0.132563	1.29145	0.355	0.29	0.097	0.258	0.533	0.467	0.111	0.889	0.478	0.522	0.588	0.412	0.444	0.167	0.194	0.194	0.5	0.5	0.167	0.5	0.333	0.882	0.118	0.04	0.28	0.48	0.16	0	0.04	1	0.235	0.765	0.37	0.074	0.037	0.519	0.444	0.556	0.263	0.211	0.105	0.053	0.316	0.053	0.375
[truncated: 45 more columns]

## Sheet: SARs-Cov-2 Clusters
S4: Clusters for SARs-Cov-2 and human genes
Clusters number	Gene	Gene_name	Protein
Cluster 1	NP_001265227|Hsap	COL6A5	collagen alpha-5(VI) chain isoform 1 precursor
Cluster 1	NP_001340108|Hsap	OVCH1	ovochymase-1 precursor
Cluster 1	NP_001352957|Hsap	DNAH12	dynein heavy chain 12, axonemal isoform 4
Cluster 1	NP_001365831|Hsap	ROS1	proto-oncogene tyrosine-protein kinase ROS isoform 3 precursor
Cluster 1	NP_002935|Hsap	ROS1	proto-oncogene tyrosine-protein kinase ROS isoform 1 precursor
Cluster 1	NP_002967|Hsap	SCN7A	sodium channel protein type 7 subunit alpha
Cluster 1	NP_006260|Hsap	RP1	oxygen-regulated protein 1 isoform 1
Cluster 1	NP_689914|Hsap	ABCA13	ATP-binding cassette sub-family A member 13
Cluster 1	NP_694996|Hsap	COL6A5	collagen alpha-5(VI) chain isoform 2 precursor
Cluster 1	NP_940980|Hsap	LRRK2	leucine-rich repeat serine/threonine-protein kinase 2
Cluster 1	XP_005268686|Hsap	LRRK2	leucine-rich repeat serine/threonine-protein kinase 2 isoform X1
Cluster 1	XP_011510923|Hsap	COL6A5	collagen alpha-5(VI) chain isoform X1
Cluster 1	XP_011513433|Hsap	ABCA13	ATP-binding cassette sub-family A member 13 isoform X2
Cluster 1	XP_011513434|Hsap	ABCA13	ATP-binding cassette sub-family A member 13 isoform X3
Cluster 1	XP_011513438|Hsap	ABCA13	ATP-binding cassette sub-family A member 13 isoform X6
Cluster 1	XP_011534357|Hsap	ROS1	proto-oncogene tyrosine-protein kinase ROS isoform X10
Cluster 1	XP_011536184|Hsap	LRRK2	leucine-rich repeat serine/threonine-protein kinase 2 isoform X8
Cluster 1	XP_024100505|Hsap	DNAH12	dynein heavy chain 12, axonemal isoform X2
Cluster 1	XP_024304736|Hsap	OVCH1	ovochymase-1 isoform X1
Cluster 1	YP_009724389|COV2|Human	ORF	ORF1ab
Cluster 1	YP_009724390|COV2|Human	ORF	ORF1a
Cluster 1	YP_009725295|COV2|Human	nucleocapsid protein N	nucleocapsid protein N
Cluster 2	NP_000677|Hsap	AGTR2	type-2 angiotensin II receptor
Cluster 2	NP_001157908|Hsap	TMEM212	transmembrane protein 212
Cluster 2	NP_001258680|Hsap	CALCRL	calcitonin gene-related peptide type 1 receptor precursor
Cluster 2	NP_001288276|Hsap	FMO2	dimethylaniline monooxygenase
Cluster 2	NP_001305861|Hsap	FAM216B	protein FAM216B
Cluster 2	NP_001451|Hsap	FMO2	dimethylaniline monooxygenase
Cluster 2	NP_001556|Hsap	CXCL10	C-X-C motif chemokine 10 precursor
Cluster 2	NP_002418|Hsap	MMP13	collagenase 3 preproprotein
Cluster 2	NP_009162|Hsap	SLC6A14	sodium- and chloride-dependent neutral and basic amino acid transporter B(0+)
Cluster 2	YP_009724391|COV2|Human	spike protein S	spike protein S
Cluster 2	YP_009724397|COV2|Human	ORF	ORF7b
Cluster 3	NP_000610|Hsap	IFNG	interferon gamma precursor
Cluster 3	NP_001004470|Hsap	ST8SIA6	alpha-2,8-sialyltransferase 8F isoform 1 precursor
Cluster 3	NP_001128618|Hsap	SLC39A8	zinc transporter ZIP8 isoform a precursor
Cluster 3	NP_001128619|Hsap	SLC39A8	zinc transporter ZIP8 isoform b precursor
Cluster 3	NP_001139206|Hsap	CDC20B	cell division cycle protein 20 homolog B isoform 2
Cluster 3	NP_001163873|Hsap	CDC20B	cell division cycle protein 20 homolog B isoform 3
Cluster 3	NP_001332890|Hsap	ST8SIA6	alpha-2,8-sialyltransferase 8F isoform 2
Cluster 3	NP_110415|Hsap	DCSTAMP	dendritic cell-specific transmembrane protein isoform 1
Cluster 3	NP_689836|Hsap	CDC20B	cell division cycle protein 20 homolog B isoform 1
Cluster 3	XP_024303058|Hsap	DCSTAMP	dendritic cell-specific transmembrane protein isoform X3
Cluster 3	YP_009724393|COV2|Human	envelope protein E	envelope protein E
Cluster 4	NP_001094387|Hsap	TSPAN19	putative tetraspanin-19
Cluster 4	XP_016779421|Hsap	TSPAN19	putative tetraspanin-19 isoform X1
Cluster 4	YP_009724395|COV2|Human	ORF	ORF6
Cluster 4	YP_009724396|COV2|Human	ORF	ORF7a

## Sheet: SARs Clusters
S5: Clusters for SARs and human genes
Clusters number	Gene	Gene_name	Protein
Cluster 1	NP_000677|Hsap	AGTR2	type-2 angiotensin II receptor
Cluster 1	NP_001157908|Hsap	TMEM212	transmembrane protein 212
Cluster 1	NP_001258680|Hsap	CALCRL	calcitonin gene-related peptide type 1 receptor precursor
Cluster 1	NP_001288276|Hsap	FMO2	dimethylaniline monooxygenase
Cluster 1	NP_001305861|Hsap	FAM216B	protein FAM216B
Cluster 1	NP_001451|Hsap	FMO2	dimethylaniline monooxygenase
Cluster 1	NP_001556|Hsap	CXCL10	C-X-C motif chemokine 10 precursor
Cluster 1	NP_002418|Hsap	MMP13	collagenase 3 preproprotein
Cluster 1	NP_009162|Hsap	SLC6A14	sodium- and chloride-dependent neutral and basic amino acid transporter B(0+)
Cluster 1	NP_001108207|Hsap	BCL2A1	bcl-2-related protein A1 isoform 2
Cluster 1	NP_004040|Hsap	BCL2A1	bcl-2-related protein A1 isoform 1
Cluster 1	NP_828851|SARs|Human	envelope protein E	envelope protein E
Cluster 1	NP_828852|SARs|Human	hypothetical protein	hypothetical protein
Cluster 1	NP_828855|SARs|Human	membrane glycoprotein M	membrane glycoprotein M
Cluster 1	NP_828858|SARs|Human	hypothetical protein	hypothetical protein
Cluster 1	NP_828853|SARs|Human	hypothetical protein	hypothetical protein
Cluster 1	NP_828857|SARs|Human	hypothetical protein	hypothetical protein
Cluster 1	NP_849175|SARs|Human	hypothetical protein	hypothetical protein
Cluster 1	NP_849177|SARs|Human	hypothetical protein	hypothetical protein
Cluster 2	NP_001019774|Hsap	C7orf77	uncharacterized protein C7orf77
Cluster 2	NP_001074006|Hsap	SNTN	sentan isoform 2
Cluster 2	NP_001191217|Hsap	MUC1	mucin-1 isoform 12 precursor
Cluster 2	NP_001191222|Hsap	MUC1	mucin-1 isoform 17 precursor
Cluster 2	NP_001335685|Hsap	SNTN	sentan isoform 1
Cluster 2	NP_009122|Hsap	WIF1	wnt inhibitory factor 1 precursor
Cluster 2	XP_025257593|Hsap	WIF1	wnt inhibitory factor 1 isoform X2
Cluster 2	NP_828859|SARs|Human	hypothetical protein	hypothetical protein
Cluster 3	NP_001265227|Hsap	COL6A5	collagen alpha-5(VI) chain isoform 1 precursor
Cluster 3	NP_001340108|Hsap	OVCH1	ovochymase-1 precursor
Cluster 3	NP_001352957|Hsap	DNAH12	dynein heavy chain 12, axonemal isoform 4
Cluster 3	NP_001365831|Hsap	ROS1	proto-oncogene tyrosine-protein kinase ROS isoform 3 precursor
Cluster 3	NP_002935|Hsap	ROS1	proto-oncogene tyrosine-protein kinase ROS isoform 1 precursor
Cluster 3	NP_002967|Hsap	SCN7A	sodium channel protein type 7 subunit alpha
Cluster 3	NP_006260|Hsap	RP1	oxygen-regulated protein 1 isoform 1
Cluster 3	NP_689914|Hsap	ABCA13	ATP-binding cassette sub-family A member 13
Cluster 3	NP_694996|Hsap	COL6A5	collagen alpha-5(VI) chain isoform 2 precursor
Cluster 3	NP_940980|Hsap	LRRK2	leucine-rich repeat serine/threonine-protein kinase 2
Cluster 3	XP_005268686|Hsap	LRRK2	leucine-rich repeat serine/threonine-protein kinase 2 isoform X1
Cluster 3	XP_011510923|Hsap	COL6A5	collagen alpha-5(VI) chain isoform X1
Cluster 3	XP_011513433|Hsap	ABCA13	ATP-binding cassette sub-family A member 13 isoform X2
Cluster 3	XP_011513434|Hsap	ABCA13	ATP-binding cassette sub-family A member 13 isoform X3
Cluster 3	XP_011513438|Hsap	ABCA13	ATP-binding cassette sub-family A member 13 isoform X6
Cluster 3	XP_011534357|Hsap	ROS1	proto-oncogene tyrosine-protein kinase ROS isoform X10
Cluster 3	XP_011536184|Hsap	LRRK2	leucine-rich repeat serine/threonine-protein kinase 2 isoform X8
Cluster 3	XP_024100505|Hsap	DNAH12	dynein heavy chain 12, axonemal isoform X2
Cluster 3	XP_024304736|Hsap	OVCH1	ovochymase-1 isoform X1
Cluster 3	NP_828849|SARs|Human	ORF	ORF1ab
Cluster 3	NP_828850|SARs|Human	ORF	ORF1a
Cluster 4	NP_001094387|Hsap	TSPAN19	putative tetraspanin-19
Cluster 4	XP_016779421|Hsap	TSPAN19	putative tetraspanin-19 isoform X1
Cluster 4	NP_828856|SARs|Human	hypothetical protein	hypothetical protein

## Sheet: MERs Clusters
S6: Clusters for MERs and human genes
Clusters number	Gene	Gene_name	Protein
Cluster 1	NP_001265227|Hsap	COL6A5	collagen alpha-5(VI) chain isoform 1 precursor
Cluster 1	NP_001340108|Hsap	OVCH1	ovochymase-1 precursor
Cluster 1	NP_001352957|Hsap	DNAH12	dynein heavy chain 12, axonemal isoform 4
Cluster 1	NP_001365831|Hsap	ROS1	proto-oncogene tyrosine-protein kinase ROS isoform 3 precursor
Cluster 1	NP_002935|Hsap	ROS1	proto-oncogene tyrosine-protein kinase ROS isoform 1 precursor
Cluster 1	NP_002967|Hsap	SCN7A	sodium channel protein type 7 subunit alpha
Cluster 1	NP_006260|Hsap	RP1	oxygen-regulated protein 1 isoform 1
Cluster 1	NP_689914|Hsap	ABCA13	ATP-binding cassette sub-family A member 13
Cluster 1	NP_694996|Hsap	COL6A5	collagen alpha-5(VI) chain isoform 2 precursor
Cluster 1	NP_940980|Hsap	LRRK2	leucine-rich repeat serine/threonine-protein kinase 2
Cluster 1	XP_005268686|Hsap	LRRK2	leucine-rich repeat serine/threonine-protein kinase 2 isoform X1
Cluster 1	XP_011510923|Hsap	COL6A5	collagen alpha-5(VI) chain isoform X1
Cluster 1	XP_011513433|Hsap	ABCA13	ATP-binding cassette sub-family A member 13 isoform X2
Cluster 1	XP_011513434|Hsap	ABCA13	ATP-binding cassette sub-family A member 13 isoform X3
Cluster 1	XP_011513438|Hsap	ABCA13	ATP-binding cassette sub-family A member 13 isoform X6
Cluster 1	XP_011534357|Hsap	ROS1	proto-oncogene tyrosine-protein kinase ROS isoform X10
Cluster 1	XP_011536184|Hsap	LRRK2	leucine-rich repeat serine/threonine-protein kinase 2 isoform X8
Cluster 1	XP_024100505|Hsap	DNAH12	dynein heavy chain 12, axonemal isoform X2
Cluster 1	XP_024304736|Hsap	OVCH1	ovochymase-1 isoform X1
Cluster 1	YP_007188577|MERs|Human	ORF	ORF1b
Cluster 1	YP_007188578|MERs|Human	ORF	ORF1a
Cluster 2	NP_000677|Hsap	AGTR2	type-2 angiotensin II receptor
Cluster 2	NP_001157908|Hsap	TMEM212	transmembrane protein 212
Cluster 2	NP_001258680|Hsap	CALCRL	calcitonin gene-related peptide type 1 receptor precursor
Cluster 2	NP_001288276|Hsap	FMO2	dimethylaniline monooxygenase
Cluster 2	NP_001451|Hsap	FMO2	dimethylaniline monooxygenase
Cluster 2	NP_001556|Hsap	CXCL10	C-X-C motif chemokine 10 precursor
Cluster 2	NP_002418|Hsap	MMP13	collagenase 3 preproprotein
Cluster 2	NP_009162|Hsap	SLC6A14	sodium- and chloride-dependent neutral and basic amino acid transporter B(0+)
Cluster 2	YP_007188579|MERs|Human	spike protein S	spike protein S
Cluster 3	NP_001193939|Hsap	CLEC12A	C-type lectin domain family 12 member A isoform 3
Cluster 3	NP_001287659|Hsap	CLEC12A	C-type lectin domain family 12 member A isoform 4
Cluster 3	NP_001305861|Hsap	FAM216B	protein FAM216B
Cluster 3	NP_775765|Hsap	DNAAF6	protein PIH1D3
Cluster 3	NP_963917|Hsap	CLEC12A	C-type lectin domain family 12 member A isoform 2
Cluster 3	XP_004064715|Hsap	PIH1D3	protein PIH1D3
Cluster 3	YP_007188580|MERs|Human	non-structural protein	non-structural protein
Cluster 3	YP_007188583|MERs|Human	non-structural protein	non-structural protein
Cluster 3	YP_007188586|MERs|Human	nucleocapsid protein N	nucleocapsid protein N
Cluster 4	NP_001019774|Hsap	C7orf77	uncharacterized protein C7orf77
Cluster 4	NP_001074006|Hsap	SNTN	sentan isoform 2
Cluster 4	NP_001191217|Hsap	MUC1	mucin-1 isoform 12 precursor
Cluster 4	NP_001191222|Hsap	MUC1	mucin-1 isoform 17 precursor
Cluster 4	NP_001335685|Hsap	SNTN	sentan isoform 1
Cluster 4	NP_009122|Hsap	WIF1	wnt inhibitory factor 1 precursor
Cluster 4	XP_025257593|Hsap	WIF1	wnt inhibitory factor 1 isoform X2
Cluster 4	YP_007188581|MERs|Human	non-structural protein	non-structural protein
Cluster 5	NP_001004470|Hsap	ST8SIA6	alpha-2,8-sialyltransferase 8F isoform 1 precursor
Cluster 5	NP_001128618|Hsap	SLC39A8	zinc transporter ZIP8 isoform a precursor
Cluster 5	NP_001128619|Hsap	SLC39A8	zinc transporter ZIP8 isoform b precursor
Cluster 5	NP_001139206|Hsap	CDC20B	cell division cycle protein 20 homolog B isoform 2
Cluster 5	NP_001163873|Hsap	CDC20B	cell division cycle protein 20 homolog B isoform 3
Cluster 5	NP_001332890|Hsap	ST8SIA6	alpha-2,8-sialyltransferase 8F isoform 2
Cluster 5	NP_110415|Hsap	DCSTAMP	dendritic cell-specific transmembrane protein isoform 1
Cluster 5	NP_689836|Hsap	CDC20B	cell division cycle protein 20 homolog B isoform 1
Cluster 5	XP_024303058|Hsap	DCSTAMP	dendritic cell-specific transmembrane protein isoform X3
Cluster 5	YP_007188582|MERs|Human	non-structural protein	non-structural protein
Cluster 5	YP_007188585|MERs|Human	membrane glycoprotein M	membrane glycoprotein M
Cluster 6	NP_001007034|Hsap	CLEC6A	C-type lectin domain family 6 member A isoform 1
Cluster 6	NP_001128772|Hsap	IL1RL1	interleukin-1 receptor-like 1 precursor
Cluster 6	NP_001229279|Hsap	VNN2	vascular non-inflammatory molecule 2 isoform 3 precursor
Cluster 6	NP_001269870|Hsap	RTKN2	rhotekin-2 isoform 2
Cluster 6	NP_001304978|Hsap	SDR16C5	epidermal retinol dehydrogenase 2 isoform 1
Cluster 6	NP_001304979|Hsap	SDR16C5	epidermal retinol dehydrogenase 2 isoform 3
Cluster 6	NP_001358350|Hsap	IL18R1	interleukin-18 receptor 1 isoform 6
Cluster 6	NP_001599|Hsap	ACADL	long-chain specific acyl-CoA dehydrogenase, mitochondrial precursor
Cluster 6	NP_003846|Hsap	IL18R1	interleukin-18 receptor 1 isoform 1 precursor
Cluster 6	NP_003847|Hsap	IL1RL1	interleukin-1 receptor-like 1 isoform 2 precursor
Cluster 6	NP_004656|Hsap	VNN2	vascular non-inflammatory molecule 2 isoform 1 precursor
Cluster 6	NP_620419|Hsap	SDR16C5	epidermal retinol dehydrogenase 2 isoform 2
Cluster 6	NP_660350|Hsap	RTKN2	rhotekin-2 isoform 1
Cluster 6	NP_940966|Hsap	DNAH12	dynein heavy chain 12, axonemal isoform 2
Cluster 6	XP_006715656|Hsap	VNN2	vascular non-inflammatory molecule 2 isoform X1
Cluster 6	XP_016866898|Hsap	VNN2	vascular non-inflammatory molecule 2 isoform X3
Cluster 6	YP_007188584|MERs|Human	envelope protein E	envelope protein E

## Sheet: Diseases
S7: Diseases associated with genes clustered with SARS-CoV-2, SARS and MERS genes
Gene	Gene_id	Disease	Disease_id	Type	Disease_Class	Semantic_Type
LRRK2	120892	PARKINSON DISEASE 8 (disorder)	C1846862	disease		Disease or Syndrome
RP1	6101	RETINITIS PIGMENTOSA 1	C0220701	disease	Congenital, Hereditary, and Neonatal Diseases and Abnormalities; Eye Diseases	Disease or Syndrome
MMP13	4322	Metaphyseal chondrodysplasia Spahr type	C0432225	disease	Congenital, Hereditary, and Neonatal Diseases and Abnormalities; Musculoskeletal Diseases	Disease or Syndrome
MMP13	4322	Spondyloepimetaphyseal Dysplasia, Missouri Type	C1865832	disease	Congenital, Hereditary, and Neonatal Diseases and Abnormalities; Musculoskeletal Diseases	Disease or Syndrome
ROS1	6098	Adenocarcinoma of lung (disorder)	C0152013	disease	Neoplasms	Neoplastic Process
AGTR2	186	Hypertensive disease	C0020538	group	Cardiovascular Diseases	Disease or Syndrome
CXCL10	3627	Brain Ischemia	C0007786	disease	Nervous System Diseases; Cardiovascular Diseases	Disease or Syndrome
MMP13	4322	Liver Cirrhosis, Experimental	C0023893	disease	Pathological Conditions, Signs and Symptoms; Digestive System Diseases	Experimental Model of Disease
RP1	6101	Retinitis Pigmentosa	C0035334	disease	Congenital, Hereditary, and Neonatal Diseases and Abnormalities; Eye Diseases	Disease or Syndrome
LRRK2	120892	Crohn Disease	C0010346	disease	Digestive System Diseases	Disease or Syndrome
LRRK2	120892	Parkinson Disease	C0030567	disease	Nervous System Diseases	Disease or Syndrome
ABCA13	154664	Schizophrenia	C0036341	disease	Mental Disorders	Mental or Behavioral Dysfunction
LRRK2	120892	Schizophrenia	C0036341	disease	Mental Disorders	Mental or Behavioral Dysfunction
MMP13	4322	Disproportionate short stature	C0878659	phenotype	Congenital, Hereditary, and Neonatal Diseases and Abnormalities; Musculoskeletal Diseases; Endocrine System Diseases	Finding
ROS1	6098	Non-Small Cell Lung Carcinoma	C0007131	disease	Neoplasms; Respiratory Tract Diseases	Neoplastic Process
RP1	6101	Rod-Cone Dystrophy	C4551714	disease	Congenital, Hereditary, and Neonatal Diseases and Abnormalities; Eye Diseases	Disease or Syndrome
LRRK2	120892	Parkinsonian Disorders	C0242422	group	Nervous System Diseases	Disease or Syndrome
LRRK2	120892	Autosomal Dominant Parkinsonism	C0752098	disease	Nervous System Diseases	Disease or Syndrome
CXCL10	3627	Influenza	C0021400	disease	Infections; Respiratory Tract Diseases	Disease or Syndrome
ROS1	6098	Glioma	C0017638	disease	Neoplasms	Neoplastic Process
AGTR2	186	Left Ventricular Hypertrophy	C0149721	disease	Pathological Conditions, Signs and Symptoms; Cardiovascular Diseases	Disease or Syndrome
CXCL10	3627	Dermatitis, Atopic	C0011615	disease	Congenital, Hereditary, and Neonatal Diseases and Abnormalities; Skin and Connective Tissue Diseases; Immune System Diseases	Disease or Syndrome
CXCL10	3627	Celiac Disease	C0007570	disease	Digestive System Diseases; Nutritional and Metabolic Diseases	Disease or Syndrome
MMP13	4322	Malignant neoplasm of prostate	C0376358	disease	Neoplasms; Male Urogenital Diseases	Neoplastic Process
MMP13	4322	Metaphyseal anadysplasia	C0432226	disease	Congenital, Hereditary, and Neonatal Diseases and Abnormalities; Musculoskeletal Diseases	Disease or Syndrome
ROS1	6098	melanoma	C0025202	disease	Neoplasms	Neoplastic Process
CXCL10	3627	Primary biliary cirrhosis	C0008312	disease	Pathological Conditions, Signs and Symptoms; Digestive System Diseases	Disease or Syndrome
AGTR2	186	Mental Retardation, X-Linked	C1136249	disease	Congenital, Hereditary, and Neonatal Diseases and Abnormalities; Nervous System Diseases	Disease or Syndrome
CXCL10	3627	Interstitial Cystitis	C0282488	disease	Female Urogenital Diseases and Pregnancy Complications; Male Urogenital Diseases	Disease or Syndrome
CXCL10	3627	Major Depressive Disorder	C1269683	disease	Mental Disorders	Mental or Behavioral Dysfunction
ROS1	6098	Gastric Adenocarcinoma	C0278701	disease	Digestive System Diseases; Neoplasms	Neoplastic Process
ROS1	6098	Malignant Glioma	C0555198	disease	Neoplasms	Neoplastic Process
CXCL10	3627	Colonic Neoplasms	C0009375	group	Digestive System Diseases; Neoplasms	Neoplastic Process
CXCL10	3627	Biliary cirrhosis	C0023892	disease	Pathological Conditions, Signs and Symptoms; Digestive System Diseases	Disease or Syndrome
CXCL10	3627	Thyroid Neoplasm	C0040136	disease	Neoplasms; Endocrine System Diseases	Neoplastic Process
CXCL10	3627	Myocardial Ischemia	C0151744	disease	Cardiovascular Diseases	Disease or Syndrome
CXCL10	3627	Thyroid carcinoma	C0549473	disease	Neoplasms; Endocrine System Diseases	Neoplastic Process
CXCL10	3627	Chronic interstitial cystitis	C0600040	disease	Female Urogenital Diseases and Pregnancy Complications; Male Urogenital Diseases	Disease or Syndrome
CXCL10	3627	Drug-Induced Liver Disease	C0860207	phenotype	Digestive System Diseases; Chemically-Induced Disorders	Disease or Syndrome
ROS1	6098	Adenocarcinoma of large intestine	C1319315	disease	Digestive System Diseases; Neoplasms	Neoplastic Process
LRRK2	120892	Depressive Symptoms	C0086132	phenotype	Behavior and Behavior Mechanisms	Sign or Symptom
LRRK2	120892	Autosomal Recessive Parkinsonism	C0752100	disease	Nervous System Diseases	Disease or Syndrome
LRRK2	120892	PARKINSON DISEASE 2, AUTOSOMAL RECESSIVE JUVENILE	C1868675	disease	Nervous System Diseases	Disease or Syndrome
ABCA13	154664	Bipolar Disorder	C0005586	disease	Mental Disorders	Mental or Behavioral Dysfunction
AGTR2	186	Corpus Luteum Cyst	C0010093	disease	Neoplasms; Female Urogenital Diseases and Pregnancy Complications; Endocrine System Diseases	Disease or Syndrome
AGTR2	186	Malignant neoplasm of stomach	C0024623	disease	Digestive System Diseases; Neoplasms	Neoplastic Process
AGTR2	186	Mammary Neoplasms, Experimental	C0024668	phenotype	Neoplasms	Neoplastic Process; Experimental Model of Disease
AGTR2	186	Neoplasm Metastasis	C0027627	phenotype	Pathological Conditions, Signs and Symptoms; Neoplasms	Neoplastic Process
AGTR2	186	Ovarian Cysts	C0029927	disease	Neoplasms; Female Urogenital Diseases and Pregnancy Complications; Endocrine System Diseases	Disease or Syndrome
AGTR2	186	Stomach Neoplasms	C0038356	group	Digestive System Diseases; Neoplasms	Neoplastic Process
AGTR2	186	Carcinoma, Lobular	C0206692	disease	Neoplasms; Skin and Connective Tissue Diseases	Neoplastic Process
AGTR2	186	Diabetic Cardiomyopathies	C0853897	disease	Endocrine System Diseases; Cardiovascular Diseases	Disease or Syndrome
AGTR2	186	Hereditary Diffuse Gastric Cancer	C1708349	disease	Digestive System Diseases; Neoplasms	Neoplastic Process
AGTR2	186	Mental Retardation, X-Linked 1	C2931498	disease	Congenital, Hereditary, and Neonatal Diseases and Abnormalities; Nervous System Diseases	Disease or Syndrome
AGTR2	186	MENTAL RETARDATION, X-LINKED 88 (disorder)	C3275444	disease		Disease or Syndrome
AGTR2	186	Mental Retardation, X-Linked Nonsyndromic	C3501611	disease	Congenital, Hereditary, and Neonatal Diseases and Abnormalities; Nervous System Diseases	Disease or Syndrome
FMO2	2327	Endometriosis	C0014175	disease	Female Urogenital Diseases and Pregnancy Complications	Disease or Syndrome
FMO2	2327	Endometrioma	C0269102	disease	Female Urogenital Diseases and Pregnancy Complications	Neoplastic Process
CXCL10	3627	Spontaneous abortion	C0000786	phenotype	Female Urogenital Diseases and Pregnancy Complications	Pathologic Function
CXCL10	3627	Abortion, Tubal	C0000822	phenotype	Female Urogenital Diseases and Pregnancy Complications	Pathologic Function
CXCL10	3627	Alopecia Areata	C0002171	disease	Skin and Connective Tissue Diseases	Disease or Syndrome
CXCL10	3627	Malignant tumor of colon	C0007102	disease	Digestive System Diseases; Neoplasms	Neoplastic Process
CXCL10	3627	Diabetes Mellitus, Insulin-Dependent	C0011854	disease	Nutritional and Metabolic Diseases; Immune System Diseases; Endocrine System Diseases	Disease or Syndrome
CXCL10	3627	Hepatitis, Toxic	C0019193	disease	Digestive System Diseases; Chemically-Induced Disorders	Injury or Poisoning
CXCL10	3627	Liver Cirrhosis, Experimental	C0023893	disease	Pathological Conditions, Signs and Symptoms; Digestive System Diseases	Experimental Model of Disease
CXCL10	3627	Unipolar Depression	C0041696	disease	Mental Disorders	Mental or Behavioral Dysfunction
CXCL10	3627	Eczema, Infantile	C0086196	disease	Congenital, Hereditary, and Neonatal Diseases and Abnormalities; Skin and Connective Tissue Diseases; Immune System Diseases	Disease or Syndrome
CXCL10	3627	Thyroid Gland Follicular Adenoma	C0151468	disease	Neoplasms; Endocrine System Diseases	Neoplastic Process
CXCL10	3627	Secondary Biliary Cholangitis	C0238065	disease	Pathological Conditions, Signs and Symptoms; Digestive System Diseases	Disease or Syndrome
CXCL10	3627	Cerebral Ischemia	C0917798	disease	Nervous System Diseases; Cardiovascular Diseases	Pathologic Function
CXCL10	3627	Hepatitis, Drug-Induced	C1262760	disease	Digestive System Diseases; Chemically-Induced Disorders	Disease or Syndrome
CXCL10	3627	Painful Bladder Syndrome	C1720830	disease	Female Urogenital Diseases and Pregnancy Complications; Male Urogenital Diseases	Disease or Syndrome
CXCL10	3627	Drug-Induced Acute Liver Injury	C3658290	disease	Digestive System Diseases; Chemically-Induced Disorders	Disease or Syndrome
CXCL10	3627	Early Pregnancy Loss	C3830362	phenotype	Female Urogenital Diseases and Pregnancy Complications	Finding
CXCL10	3627	Chemical and Drug Induced Liver Injury	C4277682	disease	Digestive System Diseases; Chemically-Induced Disorders	Disease or Syndrome
CXCL10	3627	Chemically-Induced Liver Toxicity	C4279912	disease	Digestive System Diseases; Chemically-Induced Disorders	Disease or Syndrome
CXCL10	3627	Biliary Cirrhosis, Primary, 1	C4551595	disease	Pathological Conditions, Signs and Symptoms; Digestive System Diseases	Disease or Syndrome
CXCL10	3627	Miscarriage	C4552766	disease	Female Urogenital Diseases and Pregnancy Complications	Disease or Syndrome
MMP13	4322	Prostatic Neoplasms	C0033578	group	Neoplasms; Male Urogenital Diseases	Neoplastic Process
MMP13	4322	Craniofacial Abnormalities	C0376634	group	Congenital, Hereditary, and Neonatal Diseases and Abnormalities; Musculoskeletal Diseases	Congenital Abnormality
ROS1	6098	mixed gliomas	C0259783	disease	Neoplasms	Neoplastic Process
ROS1	6098	Large cell carcinoma of lung	C0345958	disease	Neoplasms; Respiratory Tract Diseases	Neoplastic Process
RP1	6101	Disorder of eye	C0015397	group	Eye Diseases	Disease or Syndrome
SCN7A	6332	Autistic Disorder	C0004352	disease	Mental Disorders	Mental or Behavioral Dysfunction
CALCRL	10203	Dermatitis, Allergic Contact	C0162820	disease	Skin and Connective Tissue Diseases; Immune System Diseases	Disease or Syndrome
SLC6A14	11254	Celiac Disease	C0007570	disease	Digestive System Diseases; Nutritional and Metabolic Diseases	Disease or Syndrome
SLC6A14	11254	Intestinal Obstruction	C0021843	disease	Digestive System Diseases	Disease or Syndrome
SLC6A14	11254	CYSTIC FIBROSIS MODIFIER 1	C1859047	disease		Disease or Syndrome
LRRK2	120892	Renal Cell Carcinoma	C0007134	disease	Neoplasms; Female Urogenital Diseases and Pregnancy Complications; Male Urogenital Diseases	Neoplastic Process
LRRK2	120892	Endometriosis	C0014175	disease	Female Urogenital Diseases and Pregnancy Complications	Disease or Syndrome
LRRK2	120892	Nerve Degeneration	C0027746	phenotype	Pathological Conditions, Signs and Symptoms	Cell or Molecular Dysfunction
LRRK2	120892	Ramsay Hunt Paralysis Syndrome	C0242423	disease	Nervous System Diseases	Disease or Syndrome
LRRK2	120892	Endometrioma	C0269102	disease	Female Urogenital Diseases and Pregnancy Complications	Neoplastic Process
LRRK2	120892	Conventional (Clear Cell) Renal Cell Carcinoma	C0279702	disease	Neoplasms; Female Urogenital Diseases and Pregnancy Complications; Male Urogenital Diseases	Neoplastic Process
LRRK2	120892	Neurodegenerative Disorders	C0524851	group	Nervous System Diseases	Disease or Syndrome
LRRK2	120892	Autosomal Dominant Juvenile Parkinson Disease	C0752097	disease	Nervous System Diseases	Disease or Syndrome
LRRK2	120892	Parkinsonism, Experimental	C0752101	disease	Nervous System Diseases	Experimental Model of Disease
LRRK2	120892	Familial Juvenile Parkinsonism	C0752104	disease	Nervous System Diseases	Disease or Syndrome
LRRK2	120892	Parkinsonism, Juvenile	C0752105	disease	Nervous System Diseases	Disease or Syndrome
LRRK2	120892	Chromophobe Renal Cell Carcinoma	C1266042	disease	Neoplasms; Female Urogenital Diseases and Pregnancy Complications; Male Urogenital Diseases	Neoplastic Process
LRRK2	120892	Sarcomatoid Renal Cell Carcinoma	C1266043	disease	Neoplasms; Female Urogenital Diseases and Pregnancy Complications; Male Urogenital Diseases	Neoplastic Process
LRRK2	120892	Collecting Duct Carcinoma of the Kidney	C1266044	disease	Neoplasms; Female Urogenital Diseases and Pregnancy Complications; Male Urogenital Diseases	Neoplastic Process
LRRK2	120892	Papillary Renal Cell Carcinoma	C1306837	disease	Neoplasms; Female Urogenital Diseases and Pregnancy Complications; Male Urogenital Diseases	Neoplastic Process
LRRK2	120892	Ovarian Mucinous Adenocarcinoma	C1335167	disease	Neoplasms	Neoplastic Process
LRRK2	120892	Ovarian Serous Adenocarcinoma	C1335177	disease	Neoplasms	Neoplastic Process
ABCA13	154664	Colorectal Carcinoma	C0009402	disease	Digestive System Diseases; Neoplasms	Neoplastic Process
ABCA13	154664	Colorectal Neoplasms	C0009404	group	Digestive System Diseases; Neoplasms	Neoplastic Process
ABCA13	154664	Disease Exacerbation	C0235874	phenotype	Pathological Conditions, Signs and Symptoms	Finding
CXCL10	3627	Encephalitis	C0014038	disease	Nervous System Diseases	Disease or Syndrome
AGTR2	186	Cerebrovascular accident	C0038454	group	Nervous System Diseases; Cardiovascular Diseases	Disease or Syndrome
AGTR2	186	Diabetic Nephropathy	C0011881	disease	Female Urogenital Diseases and Pregnancy Complications; Male Urogenital Diseases; Endocrine System Diseases	Disease or Syndrome
MMP13	4322	Periodontitis	C0031099	disease	Stomatognathic Diseases	Disease or Syndrome
AGTR2	186	Diabetes Mellitus, Non-Insulin-Dependent	C0011860	disease	Nutritional and Metabolic Diseases; Endocrine System Diseases	Disease or Syndrome
AGTR2	186	Heart failure	C0018801	disease	Cardiovascular Diseases	Disease or Syndrome
AGTR2	186	Congestive heart failure	C0018802	disease	Cardiovascular Diseases	Disease or Syndrome
AGTR2	186	Fetal Growth Retardation	C0015934	phenotype	Pathological Conditions, Signs and Symptoms; Congenital, Hereditary, and Neonatal Diseases and Abnormalities; Female Urogenital Diseases and Pregnancy Complications	Disease or Syndrome
CXCL10	3627	Respiratory Distress Syndrome, Adult	C0035222	disease	Respiratory Tract Diseases	Disease or Syndrome
AGTR2	186	Asthma	C0004096	disease	Respiratory Tract Diseases; Immune System Diseases	Disease or Syndrome
AGTR2	186	Glomerulosclerosis (disorder)	C0178664	disease	Female Urogenital Diseases and Pregnancy Complications; Male Urogenital Diseases; Cardiovascular Diseases	Disease or Syndrome
CXCL10	3627	Myocarditis	C0027059	disease	Cardiovascular Diseases	Disease or Syndrome
CXCL10	3627	Uveitis	C0042164	disease	Eye Diseases	Disease or Syndrome
MMP13	4322	Myocardial Infarction	C0027051	disease	Pathological Conditions, Signs and Symptoms; Cardiovascular Diseases	Disease or Syndrome
MMP13	4322	Osteoarthritis of hip	C0029410	disease	Musculoskeletal Diseases	Disease or Syndrome
AGTR2	186	Cardiomyopathy, Dilated	C0007193	group	Cardiovascular Diseases	Disease or Syndrome
AGTR2	186	Diabetes Mellitus, Experimental	C0011853	disease	Nutritional and Metabolic Diseases; Endocrine System Diseases	Experimental Model of Disease
AGTR2	186	Fibrosis	C0016059	phenotype	Pathological Conditions, Signs and Symptoms	Pathologic Function
AGTR2	186	Glomerulonephritis	C0017658	disease	Female Urogenital Diseases and Pregnancy Complications; Male Urogenital Diseases	Disease or Syndrome
AGTR2	186	Focal glomerulosclerosis	C0017668	disease	Female Urogenital Diseases and Pregnancy Complications; Male Urogenital Diseases	Disease or Syndrome
AGTR2	186	Diaphragmatic Hernia	C0019284	phenotype	Pathological Conditions, Signs and Symptoms	Disease or Syndrome
AGTR2	186	Hypertension, Renovascular	C0020545	disease	Female Urogenital Diseases and Pregnancy Complications; Male Urogenital Diseases; Cardiovascular Diseases	Disease or Syndrome
AGTR2	186	Insulin Resistance	C0021655	phenotype	Nutritional and Metabolic Diseases	Pathologic Function
AGTR2	186	Kidney Failure, Chronic	C0022661	disease	Female Urogenital Diseases and Pregnancy Complications; Male Urogenital Diseases	Disease or Syndrome
AGTR2	186	Meconium Aspiration Syndrome	C0025048	phenotype	Congenital, Hereditary, and Neonatal Diseases and Abnormalities; Female Urogenital Diseases and Pregnancy Complications; Respiratory Tract Diseases	Disease or Syndrome
AGTR2	186	Reperfusion Injury	C0035126	disease	Pathological Conditions, Signs and Symptoms; Cardiovascular Diseases	Injury or Poisoning
AGTR2	186	Endotoxemia	C0376618	phenotype	Pathological Conditions, Signs and Symptoms; Infections	Disease or Syndrome
AGTR2	186	Hypoxia-Ischemia, Brain	C0752308	disease	Nervous System Diseases; Cardiovascular Diseases	Disease or Syndrome
CXCL10	3627	Bronchiolitis, Viral	C0006274	disease	Infections; Respiratory Tract Diseases	Disease or Syndrome
CXCL10	3627	Hypertension, Renovascular	C0020545	disease	Female Urogenital Diseases and Pregnancy Complications; Male Urogenital Diseases; Cardiovascular Diseases	Disease or Syndrome
CXCL10	3627	Hypothermia, natural	C0020672	phenotype	Pathological Conditions, Signs and Symptoms	Finding
CXCL10	3627	Proteinuria	C0033687	phenotype	Pathological Conditions, Signs and Symptoms; Female Urogenital Diseases and Pregnancy Complications; Male Urogenital Diseases	Finding
CXCL10	3627	Reperfusion Injury	C0035126	disease	Pathological Conditions, Signs and Symptoms; Cardiovascular Diseases	Injury or Poisoning
MMP13	4322	Brain Ischemia	C0007786	disease	Nervous System Diseases; Cardiovascular Diseases	Disease or Syndrome
MMP13	4322	Primary biliary cirrhosis	C0008312	disease	Pathological Conditions, Signs and Symptoms; Digestive System Diseases	Disease or Syndrome
MMP13	4322	Heart failure	C0018801	disease	Cardiovascular Diseases	Disease or Syndrome
MMP13	4322	Congestive heart failure	C0018802	disease	Cardiovascular Diseases	Disease or Syndrome
MMP13	4322	Liver Cirrhosis, Alcoholic	C0023891	disease	Pathological Conditions, Signs and Symptoms; Digestive System Diseases; Chemically-Induced Disorders	Disease or Syndrome
MMP13	4322	Biliary cirrhosis	C0023892	disease	Pathological Conditions, Signs and Symptoms; Digestive System Diseases	Disease or Syndrome
MMP13	4322	Meningococcal meningitis	C0025294	disease	Infections; Nervous System Diseases	Disease or Syndrome
MMP13	4322	Degenerative polyarthritis	C0029408	disease	Musculoskeletal Diseases	Disease or Syndrome
MMP13	4322	Silicosis	C0037116	disease	Respiratory Tract Diseases; Occupational Diseases	Disease or Syndrome
MMP13	4322	Gastric ulcer	C0038358	disease	Digestive System Diseases	Disease or Syndrome
MMP13	4322	Subarachnoid Hemorrhage	C0038525	disease	Pathological Conditions, Signs and Symptoms; Nervous System Diseases; Cardiovascular Diseases	Disease or Syndrome
MMP13	4322	Osteoarthrosis, localized, not specified whether primary or secondary	C0157946	disease	Musculoskeletal Diseases	Disease or Syndrome
MMP13	4322	Fetal Hypoxia	C0349489	disease	Pathological Conditions, Signs and Symptoms; Congenital, Hereditary, and Neonatal Diseases and Abnormalities; Female Urogenital Diseases and Pregnancy Complications	Disease or Syndrome
MMP13	4322	Cervical Disc Degenerative Disorder	C0410606	disease	Musculoskeletal Diseases	Disease or Syndrome
RP1	6101	Hereditary retinal dystrophy	C0154860	group	Congenital, Hereditary, and Neonatal Diseases and Abnormalities; Eye Diseases	Disease or Syndrome
SLC6A14	11254	Acidosis	C0001122	phenotype	Nutritional and Metabolic Diseases	Pathologic Function
SLC6A14	11254	Inflammatory Bowel Diseases	C0021390	group	Digestive System Diseases	Disease or Syndrome
SLC6A14	11254	Sarcoma, Experimental	C0036216	disease	Neoplasms	Neoplastic Process; Experimental Model of Disease
LRRK2	120892	Diabetic Neuropathies	C0011882	group	Nervous System Diseases; Endocrine System Diseases	Disease or Syndrome
LRRK2	120892	Dementia	C0497327	disease	Nervous System Diseases; Mental Disorders	Mental or Behavioral Dysfunction
LRRK2	120892	Degenerative disorder	C1285162	group	Pathological Conditions, Signs and Symptoms	Disease or Syndrome
LRRK2	120892	PARKINSON DISEASE, LATE-ONSET	C3160718	disease		Disease or Syndrome
LRRK2	120892	Dyskinetic syndrome	C0013384	disease	Pathological Conditions, Signs and Symptoms; Nervous System Diseases	Disease or Syndrome
LRRK2	120892	Tremor	C0040822	phenotype	Pathological Conditions, Signs and Symptoms; Nervous System Diseases	Sign or Symptom
LRRK2	120892	Movement Disorders	C0026650	group	Nervous System Diseases	Disease or Syndrome
ROS1	6098	Leukemia, Myelocytic, Acute	C0023467	disease	Neoplasms	Neoplastic Process
LRRK2	120892	Inflammatory Bowel Diseases	C0021390	group	Digestive System Diseases	Disease or Syndrome
LRRK2	120892	Sense of smell impaired	C2364082	phenotype	Nervous System Diseases	Sign or Symptom
MMP13	4322	Dental caries	C0011334	disease	Stomatognathic Diseases	Disease or Syndrome
LRRK2	120892	Lupus Erythematosus, Systemic	C0024141	disease	Skin and Connective Tissue Diseases; Immune System Diseases	Disease or Syndrome
LRRK2	120892	Muscle Rigidity	C0026837	phenotype	Pathological Conditions, Signs and Symptoms; Musculoskeletal Diseases; Nervous System Diseases	Sign or Symptom
LRRK2	120892	Sleep Disorders	C0851578	group	Pathological Conditions, Signs and Symptoms; Nervous System Diseases; Mental Disorders	Mental or Behavioral Dysfunction
MMP13	4322	Dwarfism	C0013336	disease	Congenital, Hereditary, and Neonatal Diseases and Abnormalities; Musculoskeletal Diseases; Endocrine System Diseases	Congenital Abnormality
MMP13	4322	Rickets	C0035579	disease	Nutritional and Metabolic Diseases; Musculoskeletal Diseases	Disease or Syndrome
MMP13	4322	Spondyloepimetaphyseal disorder	C0432211	disease	Congenital, Hereditary, and Neonatal Diseases and Abnormalities; Musculoskeletal Diseases	Disease or Syndrome
LRRK2	120892	Dysautonomia	C0013363	disease	Nervous System Diseases	Disease or Syndrome
LRRK2	120892	Dystonia	C0013421	phenotype	Pathological Conditions, Signs and Symptoms; Nervous System Diseases	Sign or Symptom
LRRK2	120892	Bradykinesia	C0233565	phenotype	Pathological Conditions, Signs and Symptoms; Nervous System Diseases	Sign or Symptom
AGTR2	186	Severe intellectual disability	C0036857	disease	Pathological Conditions, Signs and Symptoms; Nervous System Diseases; Mental Disorders; Behavior and Behavior Mechanisms	Mental or Behavioral Dysfunction
RP1	6101	Retinal Dystrophies	C0854723	group	Eye Diseases	Disease or Syndrome
LRRK2	120892	Anxiety	C0003467	disease	Behavior and Behavior Mechanisms	Mental or Behavioral Dysfunction
LRRK2	120892	Constipation	C0009806	phenotype	Pathological Conditions, Signs and Symptoms	Sign or Symptom
LRRK2	120892	Restless Legs Syndrome	C0035258	disease	Nervous System Diseases; Mental Disorders	Disease or Syndrome
LRRK2	120892	Sleep disturbances	C0037317	phenotype	Nervous System Diseases; Mental Disorders; Behavior and Behavior Mechanisms	Sign or Symptom
LRRK2	120892	Resting Tremor	C0234379	phenotype	Pathological Conditions, Signs and Symptoms; Nervous System Diseases	Sign or Symptom
AGTR2	186	Drooling	C0013132	phenotype	Stomatognathic Diseases	Finding
AGTR2	186	Facial paralysis	C0015469	disease	Pathological Conditions, Signs and Symptoms; Nervous System Diseases; Stomatognathic Diseases	Disease or Syndrome
AGTR2	186	Flatfoot	C0016202	phenotype	Congenital, Hereditary, and Neonatal Diseases and Abnormalities; Musculoskeletal Diseases	Anatomical Abnormality
AGTR2	186	Meckel Diverticulum	C0025037	disease	Pathological Conditions, Signs and Symptoms; Congenital, Hereditary, and Neonatal Diseases and Abnormalities; Digestive System Diseases	Congenital Abnormality
AGTR2	186	Moderate intellectual disability	C0026351	disease	Pathological Conditions, Signs and Symptoms; Nervous System Diseases; Mental Disorders; Behavior and Behavior Mechanisms	Mental or Behavioral Dysfunction
AGTR2	186	Obesity	C0028754	disease	Pathological Conditions, Signs and Symptoms; Nutritional and Metabolic Diseases	Disease or Syndrome
AGTR2	186	Pyloric Stenosis	C0034194	phenotype	Digestive System Diseases	Pathologic Function
AGTR2	186	Babinski Reflex	C0034935	phenotype		Finding
AGTR2	186	Urinary Incontinence	C0042024	phenotype	Pathological Conditions, Signs and Symptoms; Female Urogenital Diseases and Pregnancy Complications; Male Urogenital Diseases	Pathologic Function
AGTR2	186	Triglycerides measurement	C0202236	phenotype		Laboratory Procedure
AGTR2	186	Macrocephaly	C0221355	disease	Congenital, Hereditary, and Neonatal Diseases and Abnormalities; Musculoskeletal Diseases; Nervous System Diseases	Congenital Abnormality
AGTR2	186	Small for gestational age (disorder)	C0235991	phenotype	Pathological Conditions, Signs and Symptoms; Female Urogenital Diseases and Pregnancy Complications	Finding
AGTR2	186	Late tooth eruption	C0239174	phenotype		Finding
AGTR2	186	Small for gestational age fetus	C0302511	phenotype	Pathological Conditions, Signs and Symptoms	Finding
AGTR2	186	High density lipoprotein measurement	C0392885	phenotype		Laboratory Procedure
AGTR2	186	Downward slant of palpebral fissure	C0423110	phenotype		Finding
AGTR2	186	Broad nasal tip	C0426429	phenotype		Finding
AGTR2	186	Serum HDL cholesterol measurement	C0428472	phenotype		Laboratory Procedure
AGTR2	186	Delayed speech and language development	C0454644	phenotype	Behavior and Behavior Mechanisms	Finding
AGTR2	186	Tonic - clonic seizures	C0494475	disease	Pathological Conditions, Signs and Symptoms; Nervous System Diseases	Disease or Syndrome
AGTR2	186	Global developmental delay	C0557874	disease		Mental or Behavioral Dysfunction
AGTR2	186	Autistic behavior	C0856975	disease	Behavior and Behavior Mechanisms	Mental or Behavioral Dysfunction
AGTR2	186	Attention deficit hyperactivity disorder	C1263846	disease	Mental Disorders	Mental or Behavioral Dysfunction
AGTR2	186	Depressed nasal bridge	C1836542	phenotype		Finding
AGTR2	186	Thick lower lip vermilion	C1839739	phenotype		Finding
AGTR2	186	Widened subarachnoid space	C1846151	phenotype		Finding
AGTR2	186	Poor speech	C1848207	phenotype	Pathological Conditions, Signs and Symptoms; Nervous System Diseases	Finding
AGTR2	186	Long palpebral fissure	C1849340	phenotype		Finding
AGTR2	186	Midface retrusion	C1853242	phenotype		Finding
AGTR2	186	Periorbital fullness	C1858036	phenotype		Finding
AGTR2	186	Long philtrum	C1865014	phenotype		Finding
AGTR2	186	Thin upper lip vermilion	C1865017	phenotype		Finding
AGTR2	186	Profound intellectual disabilities	C3161330	disease	Pathological Conditions, Signs and Symptoms; Nervous System Diseases; Mental Disorders; Behavior and Behavior Mechanisms	Mental or Behavioral Dysfunction
AGTR2	186	Mild neurosensory hearing impairment	C4021538	disease	Pathological Conditions, Signs and Symptoms; Nervous System Diseases; Otorhinolaryngologic Diseases	Disease or Syndrome
AGTR2	186	Shortening of all distal phalanges of the fingers	C4021608	phenotype		Finding
AGTR2	186	Clinodactyly of the 2nd toe	C4021620	disease		Anatomical Abnormality
AGTR2	186	Moderate sensorineural hearing impairment	C4024664	phenotype	Pathological Conditions, Signs and Symptoms; Nervous System Diseases; Otorhinolaryngologic Diseases	Finding
AGTR2	186	Absence Seizures	C4316903	phenotype	Pathological Conditions, Signs and Symptoms; Nervous System Diseases	Disease or Syndrome
AGTR2	186	2-3 toe syndactyly	C4551570	disease		Congenital Abnormality
CXCL10	3627	Rheumatoid Arthritis	C0003873	disease	Skin and Connective Tissue Diseases; Musculoskeletal Diseases; Immune System Diseases	Disease or Syndrome
CXCL10	3627	Asthma	C0004096	disease	Respiratory Tract Diseases; Immune System Diseases	Disease or Syndrome
CXCL10	3627	Autoimmune Diseases	C0004364	group	Immune System Diseases	Disease or Syndrome
CXCL10	3627	Malignant neoplasm of breast	C0006142	disease	Neoplasms; Skin and Connective Tissue Diseases	Neoplastic Process
CXCL10	3627	Malignant Neoplasms	C0006826	group	Neoplasms	Neoplastic Process
CXCL10	3627	Hepatitis B	C0019163	disease	Digestive System Diseases; Infections	Disease or Syndrome
CXCL10	3627	Hepatitis C	C0019196	disease	Digestive System Diseases; Infections	Disease or Syndrome
CXCL10	3627	HIV Infections	C0019693	group	Infections; Immune System Diseases	Disease or Syndrome
CXCL10	3627	Chronic Obstructive Airway Disease	C0024117	disease	Respiratory Tract Diseases	Disease or Syndrome
CXCL10	3627	Lupus Erythematosus, Systemic	C0024141	disease	Skin and Connective Tissue Diseases; Immune System Diseases	Disease or Syndrome
CXCL10	3627	melanoma	C0025202	disease	Neoplasms	Neoplastic Process
CXCL10	3627	Multiple Sclerosis	C0026769	disease	Immune System Diseases; Nervous System Diseases	Disease or Syndrome
CXCL10	3627	Neoplasm Metastasis	C0027627	phenotype	Pathological Conditions, Signs and Symptoms; Neoplasms	Neoplastic Process
CXCL10	3627	Neoplasms	C0027651	group	Neoplasms	Neoplastic Process
CXCL10	3627	Tuberculosis	C0041296	disease	Infections	Disease or Syndrome
CXCL10	3627	Tuberculosis, Pulmonary	C0041327	disease	Infections; Respiratory Tract Diseases	Disease or Syndrome
CXCL10	3627	Virus Diseases	C0042769	group	Infections	Disease or Syndrome
CXCL10	3627	Protein measurement	C0202202	group		Laboratory Procedure
CXCL10	3627	Hepatitis B, Chronic	C0524909	disease	Digestive System Diseases; Infections	Disease or Syndrome
CXCL10	3627	Hepatitis C, Chronic	C0524910	disease	Digestive System Diseases; Infections	Disease or Syndrome
CXCL10	3627	Tumor Cell Invasion	C1269955	phenotype		Neoplastic Process
CXCL10	3627	Primary malignant neoplasm	C1306459	group	Neoplasms	Neoplastic Process
CXCL10	3627	Latent Tuberculosis	C1609538	disease	Infections	Disease or Syndrome
CXCL10	3627	Blood Protein Measurement	C2985280	phenotype		Laboratory Procedure
CXCL10	3627	Human immunodeficiency virus (HIV) II infection category B1	C3854222	disease		Disease or Syndrome
MMP13	4322	Arthritis	C0003864	disease	Musculoskeletal Diseases	Disease or Syndrome
MMP13	4322	Rheumatoid Arthritis	C0003873	disease	Skin and Connective Tissue Diseases; Musculoskeletal Diseases; Immune System Diseases	Disease or Syndrome
MMP13	4322	Malignant neoplasm of breast	C0006142	disease	Neoplasms; Skin and Connective Tissue Diseases	Neoplastic Process
MMP13	4322	Malignant Neoplasms	C0006826	group	Neoplasms	Neoplastic Process
MMP13	4322	Squamous cell carcinoma	C0007137	disease	Neoplasms	Neoplastic Process
MMP13	4322	Chondrosarcoma	C0008479	disease	Neoplasms	Neoplastic Process
MMP13	4322	Lordosis	C0024003	phenotype	Musculoskeletal Diseases	Disease or Syndrome
MMP13	4322	Neoplasm Metastasis	C0027627	phenotype	Pathological Conditions, Signs and Symptoms; Neoplasms	Neoplastic Process
MMP13	4322	Neoplasms	C0027651	group	Neoplasms	Neoplastic Process
MMP13	4322	Scoliosis, unspecified	C0036439	disease	Musculoskeletal Diseases	Disease or Syndrome
MMP13	4322	Joint stiffness	C0162298	phenotype	Musculoskeletal Diseases	Sign or Symptom
MMP13	4322	Low density lipoprotein cholesterol measurement	C0202117	phenotype		Laboratory Procedure
MMP13	4322	Triglycerides measurement	C0202236	phenotype		Laboratory Procedure
MMP13	4322	Waddling gait	C0231712	phenotype	Pathological Conditions, Signs and Symptoms; Nervous System Diseases	Sign or Symptom
MMP13	4322	Hip joint varus deformity - observation	C0239138	phenotype	Pathological Conditions, Signs and Symptoms; Musculoskeletal Diseases	Finding
MMP13	4322	Metaphyseal chondrodysplasia	C0265290	disease	Congenital, Hereditary, and Neonatal Diseases and Abnormalities; Musculoskeletal Diseases	Congenital Abnormality
MMP13	4322	Short stature	C0349588	phenotype		Finding
MMP13	4322	High density lipoprotein measurement	C0392885	phenotype		Laboratory Procedure
MMP13	4322	Short leg	C0426901	phenotype		Finding
MMP13	4322	Serum HDL cholesterol measurement	C0428472	phenotype		Laboratory Procedure
MMP13	4322	Serum LDL cholesterol measurement	C0428474	phenotype		Laboratory Procedure
MMP13	4322	Clumsiness - motor delay	C0520947	disease	Pathological Conditions, Signs and Symptoms; Nervous System Diseases; Mental Disorders; Behavior and Behavior Mechanisms	Disease or Syndrome
MMP13	4322	Delayed bone age	C0541764	phenotype		Finding
MMP13	4322	Genu varum	C0544755	phenotype	Musculoskeletal Diseases	Finding
MMP13	4322	Gait abnormality	C0575081	group	Pathological Conditions, Signs and Symptoms; Nervous System Diseases	Finding
MMP13	4322	Knee joint valgus deformity	C0576093	disease	Musculoskeletal Diseases	Anatomical Abnormality
MMP13	4322	Breast Carcinoma	C0678222	disease	Neoplasms; Skin and Connective Tissue Diseases	Neoplastic Process
MMP13	4322	Carcinoma of lung	C0684249	disease	Neoplasms; Respiratory Tract Diseases	Neoplastic Process
MMP13	4322	Deformity of lower limb	C1096086	disease		Anatomical Abnormality
MMP13	4322	Tumor Cell Invasion	C1269955	phenotype		Neoplastic Process
MMP13	4322	Primary malignant neoplasm	C1306459	group	Neoplasms	Neoplastic Process
MMP13	4322	Hip Dysplasia	C1328407	disease	Musculoskeletal Diseases; Wounds and Injuries	Anatomical Abnormality
MMP13	4322	Tibial bowing	C1837081	phenotype	Musculoskeletal Diseases	Finding
MMP13	4322	Metaphyseal cupping	C1837082	phenotype		Finding
MMP13	4322	Platyspondyly	C1844704	phenotype		Finding
MMP13	4322	Small epiphyses	C1846803	phenotype		Finding
MMP13	4322	Metaphyseal widening	C1849039	phenotype		Finding
MMP13	4322	Flared metaphysis	C1850135	phenotype		Finding
MMP13	4322	Motor delay	C1854301	phenotype	Mental Disorders	Finding
MMP13	4322	Progressive leg bowing	C1855191	phenotype		Finding
MMP13	4322	Bowing of the long bones	C1855340	phenotype		Congenital Abnormality
MMP13	4322	Limitation of joint mobility	C1857108	phenotype		Finding
MMP13	4322	Flattened epiphysis	C1857527	phenotype		Finding
MMP13	4322	Radial bowing	C1859399	phenotype		Anatomical Abnormality
MMP13	4322	Femoral bowing	C1859461	phenotype	Musculoskeletal Diseases	Finding
MMP13	4322	Flared, irregular rib ends	C1865833	phenotype		Finding
MMP13	4322	Flared iliac wings	C1865841	phenotype		Finding
MMP13	4322	Ulnar bowing	C1865847	phenotype		Finding
MMP13	4322	Rhizomelia	C1866730	disease		Congenital Abnormality
MMP13	4322	Pear-shaped vertebrae	C1866731	phenotype		Finding
MMP13	4322	Limited elbow extension	C1867103	phenotype		Finding
MMP13	4322	Irregular sclerotic endplates	C1868554	phenotype		Finding
MMP13	4322	Reduced bone mineral density	C2674432	phenotype		Finding
MMP13	4322	Aplasia/Hypoplasia of the radius	C2749463	phenotype		Finding
MMP13	4322	Short Stature, CTCAE	C2919142	phenotype		Finding
MMP13	4322	Secondary Neoplasm	C2939419	group	Pathological Conditions, Signs and Symptoms; Neoplasms	Neoplastic Process
MMP13	4322	Metaphyseal sclerosis	C3552526	phenotype		Finding
MMP13	4322	METAPHYSEAL ANADYSPLASIA 1, AUTOSOMAL DOMINANT	C4016643	disease		Finding
MMP13	4322	Abnormality of epiphysis morphology	C4021611	phenotype		Anatomical Abnormality
MMP13	4322	Abnormality of the head	C4021812	disease		Anatomical Abnormality
MMP13	4322	Abnormality of ulnar metaphysis	C4025424	disease		Anatomical Abnormality
MMP13	4322	Abnormality of the metaphysis	C4025814	disease		Anatomical Abnormality
MMP13	4322	Gait Disturbance, CTCAE	C4551915	phenotype		Finding
ROS1	6098	Adenocarcinoma	C0001418	group	Neoplasms	Neoplastic Process
ROS1	6098	Alzheimer's Disease	C0002395	disease	Nervous System Diseases; Mental Disorders	Disease or Syndrome
ROS1	6098	Malignant neoplasm of breast	C0006142	disease	Neoplasms; Skin and Connective Tissue Diseases	Neoplastic Process
ROS1	6098	Malignant Neoplasms	C0006826	group	Neoplasms	Neoplastic Process
ROS1	6098	Colorectal Carcinoma	C0009402	disease	Digestive System Diseases; Neoplasms	Neoplastic Process
ROS1	6098	Diabetes Mellitus	C0011849	group	Nutritional and Metabolic Diseases; Endocrine System Diseases	Disease or Syndrome
ROS1	6098	Glioblastoma	C0017636	disease	Neoplasms	Neoplastic Process
ROS1	6098	Hyperglycemia	C0020456	disease	Nutritional and Metabolic Diseases	Disease or Syndrome
ROS1	6098	Meningitis, Pneumococcal	C0025295	disease	Infections; Nervous System Diseases	Disease or Syndrome
ROS1	6098	Neoplasm Metastasis	C0027627	phenotype	Pathological Conditions, Signs and Symptoms; Neoplasms	Neoplastic Process
ROS1	6098	Neoplasms	C0027651	group	Neoplasms	Neoplastic Process
ROS1	6098	Neuroblastoma	C0027819	disease	Neoplasms	Neoplastic Process
ROS1	6098	Creatine kinase measurement	C0201973	phenotype		Laboratory Procedure
ROS1	6098	Malignant neoplasm of lung	C0242379	disease	Neoplasms; Respiratory Tract Diseases	Neoplastic Process
ROS1	6098	Adult Glioblastoma	C0278878	disease	Neoplasms	Neoplastic Process
ROS1	6098	Childhood Glioblastoma	C0280474	disease	Neoplasms	Neoplastic Process
ROS1	6098	Short stature	C0349588	phenotype		Finding
ROS1	6098	Adolescent idiopathic scoliosis	C0410702	disease	Musculoskeletal Diseases	Anatomical Abnormality
ROS1	6098	Carcinogenesis	C0596263	phenotype	Pathological Conditions, Signs and Symptoms; Neoplasms	Neoplastic Process
ROS1	6098	Breast Carcinoma	C0678222	disease	Neoplasms; Skin and Connective Tissue Diseases	Neoplastic Process
ROS1	6098	Carcinoma of lung	C0684249	disease	Neoplasms; Respiratory Tract Diseases	Neoplastic Process
ROS1	6098	Colon Carcinoma	C0699790	disease	Digestive System Diseases; Neoplasms	Neoplastic Process
ROS1	6098	Central neuroblastoma	C0700095	disease	Neoplasms; Nervous System Diseases	Neoplastic Process
ROS1	6098	Endothelial dysfunction	C0856169	phenotype		Disease or Syndrome
ROS1	6098	Tumor Cell Invasion	C1269955	phenotype		Neoplastic Process
ROS1	6098	Primary malignant neoplasm	C1306459	group	Neoplasms	Neoplastic Process
ROS1	6098	Primary malignant neoplasm of lung	C1306460	disease	Neoplasms; Respiratory Tract Diseases	Neoplastic Process
ROS1	6098	Glioblastoma Multiforme	C1621958	disease	Neoplasms	Neoplastic Process
ROS1	6098	SCOLIOSIS, ISOLATED, SUSCEPTIBILITY TO, 3	C1837461	disease		Finding
ROS1	6098	Liver carcinoma	C2239176	disease	Digestive System Diseases; Neoplasms	Neoplastic Process
ROS1	6098	Abnormality of brain morphology	C4021085	phenotype		Anatomical Abnormality
ROS1	6098	Childhood Neuroblastoma	C4086165	disease	Neoplasms	Neoplastic Process
RP1	6101	Intracranial Aneurysm	C0007766	disease	Nervous System Diseases; Cardiovascular Diseases	Disease or Syndrome
RP1	6101	Diabetes Mellitus, Non-Insulin-Dependent	C0011860	disease	Nutritional and Metabolic Diseases; Endocrine System Diseases	Disease or Syndrome
RP1	6101	Glaucoma	C0017601	disease	Eye Diseases	Disease or Syndrome
RP1	6101	Conductive hearing loss	C0018777	disease	Pathological Conditions, Signs and Symptoms; Nervous System Diseases; Otorhinolaryngologic Diseases	Disease or Syndrome
RP1	6101	Sensorineural Hearing Loss (disorder)	C0018784	disease	Pathological Conditions, Signs and Symptoms; Nervous System Diseases; Otorhinolaryngologic Diseases	Disease or Syndrome
RP1	6101	Severe Dengue	C0019100	disease	Infections	Disease or Syndrome
RP1	6101	Hyperinsulinism	C0020459	disease	Nutritional and Metabolic Diseases	Disease or Syndrome
RP1	6101	Hypogonadism	C0020619	disease	Endocrine System Diseases	Disease or Syndrome
RP1	6101	Keratoconus	C0022578	disease	Eye Diseases	Disease or Syndrome
RP1	6101	Longevity	C0023980	phenotype		Temporal Concept
RP1	6101	Myopia	C0027092	disease	Eye Diseases	Disease or Syndrome
RP1	6101	Nyctalopia	C0028077	disease	Eye Diseases	Disease or Syndrome
RP1	6101	Nystagmus	C0028738	disease	Eye Diseases; Nervous System Diseases	Disease or Syndrome
RP1	6101	Obesity	C0028754	disease	Pathological Conditions, Signs and Symptoms; Nutritional and Metabolic Diseases	Disease or Syndrome
RP1	6101	Ophthalmoplegia	C0029089	phenotype	Pathological Conditions, Signs and Symptoms; Eye Diseases; Nervous System Diseases	Sign or Symptom
RP1	6101	Optic Atrophy	C0029124	disease	Eye Diseases; Nervous System Diseases	Disease or Syndrome
RP1	6101	Photophobia	C0085636	phenotype	Pathological Conditions, Signs and Symptoms; Eye Diseases; Nervous System Diseases	Sign or Symptom
RP1	6101	Cataract	C0086543	disease	Eye Diseases	Acquired Abnormality
RP1	6101	Hyperreflexia	C0151889	phenotype	Pathological Conditions, Signs and Symptoms; Nervous System Diseases	Finding
RP1	6101	Low density lipoprotein cholesterol measurement	C0202117	phenotype		Laboratory Procedure
RP1	6101	Visual field constriction	C0235095	phenotype	Pathological Conditions, Signs and Symptoms; Eye Diseases; Nervous System Diseases	Finding
RP1	6101	Congenital hypoplasia of penis	C0266435	disease	Congenital, Hereditary, and Neonatal Diseases and Abnormalities	Congenital Abnormality
RP1	6101	Autosomal dominant retinitis pigmentosa	C0339525	disease	Congenital, Hereditary, and Neonatal Diseases and Abnormalities; Eye Diseases	Congenital Abnormality
RP1	6101	Dengue Shock Syndrome	C0376300	disease	Infections	Disease or Syndrome
RP1	6101	Red cell distribution width determination	C0427460	phenotype		Laboratory Procedure
RP1	6101	Blindness	C0456909	phenotype	Pathological Conditions, Signs and Symptoms; Eye Diseases; Nervous System Diseases	Disease or Syndrome
RP1	6101	Electroretinogram abnormal	C0476397	phenotype		Finding
RP1	6101	Carcinoma of lung	C0684249	disease	Neoplasms; Respiratory Tract Diseases	Neoplastic Process
RP1	6101	RDW - Red blood cell distribution width result	C1304746	phenotype		Laboratory or Test Result
RP1	6101	Serum total cholesterol measurement	C1445957	phenotype		Laboratory Procedure
RP1	6101	Bone spicule pigmentation of the retina	C1836926	phenotype		Finding
RP1	6101	Anteverted nostril	C1840077	phenotype		Finding
RP1	6101	Nasal bridge wide	C1849367	phenotype		Finding
RP1	6101	Abnormality of retinal pigmentation	C1862475	phenotype		Finding
RP1	6101	Nystagmus, CTCAE 3.0	C1963184	phenotype		Finding
RP1	6101	Intellectual Disability	C3714756	group	Pathological Conditions, Signs and Symptoms; Nervous System Diseases; Mental Disorders; Behavior and Behavior Mechanisms	Mental or Behavioral Dysfunction
RP1	6101	Undetectable light- and dark-adapted electroretinogram	C4021570	phenotype		Finding
RP1	6101	Atypical scarring of skin	C4021786	phenotype	Pathological Conditions, Signs and Symptoms	Pathologic Function
RP1	6101	Progressive night blindness	C4024818	phenotype	Eye Diseases	Finding
RP1	6101	Nystagmus, CTCAE 5.0	C4554036	phenotype		Finding
CALCRL	10203	Waist-Hip Ratio	C0205682	phenotype		Organism Attribute
CALCRL	10203	RESTING HEART RATE	C1821417	phenotype		Finding
LRRK2	120892	Alzheimer's Disease	C0002395	disease	Nervous System Diseases; Mental Disorders	Disease or Syndrome
LRRK2	120892	Asthma	C0004096	disease	Respiratory Tract Diseases; Immune System Diseases	Disease or Syndrome
LRRK2	120892	Autoimmune Diseases	C0004364	group	Immune System Diseases	Disease or Syndrome
LRRK2	120892	Malignant Neoplasms	C0006826	group	Neoplasms	Neoplastic Process
LRRK2	120892	Celiac Disease	C0007570	disease	Digestive System Diseases; Nutritional and Metabolic Diseases	Disease or Syndrome
LRRK2	120892	Cholangitis, Sclerosing	C0008313	disease	Digestive System Diseases	Disease or Syndrome
LRRK2	120892	Ulcerative Colitis	C0009324	disease	Digestive System Diseases	Disease or Syndrome
LRRK2	120892	Color vision defect	C0009398	phenotype	Pathological Conditions, Signs and Symptoms; Eye Diseases; Nervous System Diseases	Disease or Syndrome
LRRK2	120892	Common Variable Immunodeficiency	C0009447	disease	Immune System Diseases	Disease or Syndrome
LRRK2	120892	Deglutition Disorders	C0011168	group	Digestive System Diseases; Otorhinolaryngologic Diseases	Disease or Syndrome
LRRK2	120892	Presenile dementia	C0011265	disease	Nervous System Diseases; Mental Disorders	Mental or Behavioral Dysfunction
LRRK2	120892	Depressive disorder	C0011581	disease	Mental Disorders	Mental or Behavioral Dysfunction
LRRK2	120892	Diabetes Mellitus, Insulin-Dependent	C0011854	disease	Nutritional and Metabolic Diseases; Immune System Diseases; Endocrine System Diseases	Disease or Syndrome
LRRK2	120892	Diarrhea	C0011991	phenotype	Pathological Conditions, Signs and Symptoms	Sign or Symptom
LRRK2	120892	Diplopia	C0012569	phenotype	Pathological Conditions, Signs and Symptoms; Eye Diseases; Nervous System Diseases	Finding
LRRK2	120892	Gliosis	C0017639	phenotype	Pathological Conditions, Signs and Symptoms	Pathologic Function
LRRK2	120892	Hallucinations	C0018524	disease	Pathological Conditions, Signs and Symptoms; Nervous System Diseases; Behavior and Behavior Mechanisms	Mental or Behavioral Dysfunction
LRRK2	120892	Impulsive Behavior	C0021125	phenotype	Behavior and Behavior Mechanisms	Mental or Behavioral Dysfunction
LRRK2	120892	Multiple Sclerosis	C0026769	disease	Immune System Diseases; Nervous System Diseases	Disease or Syndrome
LRRK2	120892	Muscle Spasticity	C0026838	phenotype	Pathological Conditions, Signs and Symptoms; Musculoskeletal Diseases; Nervous System Diseases	Sign or Symptom
LRRK2	120892	Nausea	C0027497	phenotype	Pathological Conditions, Signs and Symptoms	Sign or Symptom
LRRK2	120892	Neuroblastoma	C0027819	disease	Neoplasms	Neoplastic Process
LRRK2	120892	Psoriasis	C0033860	disease	Skin and Connective Tissue Diseases	Disease or Syndrome
LRRK2	120892	Spasm	C0037763	phenotype	Pathological Conditions, Signs and Symptoms; Nervous System Diseases	Sign or Symptom
LRRK2	120892	Ankylosing spondylitis	C0038013	disease	Musculoskeletal Diseases	Disease or Syndrome
LRRK2	120892	Akinesia	C0085623	disease	Pathological Conditions, Signs and Symptoms; Nervous System Diseases	Disease or Syndrome
LRRK2	120892	Agitation	C0085631	phenotype	Nervous System Diseases; Mental Disorders; Behavior and Behavior Mechanisms	Sign or Symptom
LRRK2	120892	Apathy	C0085632	phenotype	Behavior and Behavior Mechanisms	Mental or Behavioral Dysfunction
LRRK2	120892	Panic Attacks	C0086769	disease	Mental Disorders	Mental or Behavioral Dysfunction
LRRK2	120892	Social Communication Disorder	C0150080	disease	Mental Disorders	Mental or Behavioral Dysfunction
LRRK2	120892	Hyperreflexia	C0151889	phenotype	Pathological Conditions, Signs and Symptoms; Nervous System Diseases	Finding
LRRK2	120892	Gastroparesis	C0152020	disease	Pathological Conditions, Signs and Symptoms; Digestive System Diseases	Disease or Syndrome
LRRK2	120892	Low density lipoprotein cholesterol measurement	C0202117	phenotype		Laboratory Procedure
LRRK2	120892	Gait, Shuffling	C0231688	phenotype	Pathological Conditions, Signs and Symptoms; Nervous System Diseases	Finding
LRRK2	120892	Hallucinations, Visual	C0233763	phenotype	Pathological Conditions, Signs and Symptoms; Nervous System Diseases; Behavior and Behavior Mechanisms	Sign or Symptom
LRRK2	120892	Reduced concentration span	C0262630	phenotype	Behavior and Behavior Mechanisms	Finding
LRRK2	120892	Abnormal male sexual function	C0278097	disease		Mental or Behavioral Dysfunction
LRRK2	120892	Dementia of frontal lobe type	C0338455	disease	Nervous System Diseases; Mental Disorders	Disease or Syndrome
LRRK2	120892	Impaired cognition	C0338656	disease	Mental Disorders	Mental or Behavioral Dysfunction
LRRK2	120892	Chronic constipation	C0401149	phenotype	Pathological Conditions, Signs and Symptoms	Sign or Symptom
LRRK2	120892	Low frustration tolerance	C0548883	phenotype	Behavior and Behavior Mechanisms	Mental or Behavioral Dysfunction
LRRK2	120892	Central neuroblastoma	C0700095	disease	Neoplasms; Nervous System Diseases	Neoplastic Process
LRRK2	120892	Dyssomnias	C0700201	disease	Nervous System Diseases; Mental Disorders	Mental or Behavioral Dysfunction
LRRK2	120892	Lewy Body Disease	C0752347	disease	Nervous System Diseases; Mental Disorders	Disease or Syndrome
LRRK2	120892	Expressionless face	C0813217	phenotype	Nervous System Diseases	Finding
LRRK2	120892	Frequent falls	C0850703	phenotype	Pathological Conditions, Signs and Symptoms; Nervous System Diseases	Finding
LRRK2	120892	Sleeplessness	C0917801	phenotype	Nervous System Diseases; Mental Disorders	Sign or Symptom
LRRK2	120892	Autoimmune thyroiditis	C0920350	disease	Immune System Diseases; Endocrine System Diseases	Disease or Syndrome
LRRK2	120892	Female sexual dysfunction	C1112442	disease		Mental or Behavioral Dysfunction
LRRK2	120892	Male sexual dysfunction	C1112443	disease		Disease or Syndrome
LRRK2	120892	Weight decreased	C1262477	phenotype	Pathological Conditions, Signs and Symptoms	Finding
LRRK2	120892	Primary malignant neoplasm	C1306459	group	Neoplasms	Neoplastic Process
LRRK2	120892	Serum total cholesterol measurement	C1445957	phenotype		Laboratory Procedure
LRRK2	120892	Familial (FPAH)	C1611743	disease		Disease or Syndrome
LRRK2	120892	Gait imbalance	C1836150	phenotype		Finding
LRRK2	120892	Spastic/hyperactive bladder	C1836904	phenotype		Finding
LRRK2	120892	Postural instability	C1843921	phenotype	Nervous System Diseases	Finding
LRRK2	120892	Substantia nigra gliosis	C1846865	phenotype	Pathological Conditions, Signs and Symptoms	Finding
LRRK2	120892	Parkinsonism with favorable response to dopaminergic medication	C1846868	phenotype	Nervous System Diseases	Finding
LRRK2	120892	Slow progression	C1854494	phenotype		Finding
LRRK2	120892	Orthostatic hypotension due to autonomic dysfunction	C1868528	phenotype	Nervous System Diseases; Cardiovascular Diseases	Finding
LRRK2	120892	Agitation, CTCAE 3.0	C1963060	phenotype		Finding
LRRK2	120892	AUTOIMMUNE DISEASE, SUSCEPTIBILITY TO, 6	C3150797	disease		Finding
LRRK2	120892	Parkinson Disease, Familial, Type 1	C3489791	disease	Nervous System Diseases	Disease or Syndrome
LRRK2	120892	Juvenile arthritis	C3495559	disease	Skin and Connective Tissue Diseases; Musculoskeletal Diseases; Immune System Diseases	Disease or Syndrome
LRRK2	120892	AUTOIMMUNE DISEASE, MULTISYSTEM, INFANTILE-ONSET, 1	C4014795	disease		Disease or Syndrome
LRRK2	120892	Childhood Neuroblastoma	C4086165	disease	Neoplasms	Neoplastic Process
LRRK2	120892	Young onset Parkinson disease	C4275179	disease	Nervous System Diseases	Disease or Syndrome
LRRK2	120892	AUTOIMMUNE DISEASE, MULTISYSTEM, INFANTILE-ONSET, 2	C4310768	disease		Disease or Syndrome
LRRK2	120892	Sporadic Parkinson disease	C4511452	disease	Nervous System Diseases	Disease or Syndrome
LRRK2	120892	Monotonic speech	C4531121	phenotype		Finding
LRRK2	120892	Cerebral cortical atrophy	C4551583	disease		Disease or Syndrome
LRRK2	120892	Agitation, CTCAE 5.0	C4552855	phenotype		Finding
LRRK2	120892	Spasticity, CTCAE	C4553743	phenotype		Finding
ABCA13	154664	Serum albumin measurement	C0523465	phenotype		Laboratory Procedure
DNAH12	201625	Forced expiratory volume function	C0016529	phenotype		Organ or Tissue Function
DNAH12	201625	Memory, Short-Term	C0025265	phenotype		Mental Process
COL6A5	256076	Body mass index procedure	C0005893	phenotype		Diagnostic Procedure
COL6A5	256076	Leukemia, Myelocytic, Acute	C0023467	disease	Neoplasms	Neoplastic Process
COL6A5	256076	Atopy	C0392707	phenotype	Immune System Diseases	Pathologic Function
COL6A5	256076	Finding of body mass index	C0578022	phenotype		Finding
COL6A5	256076	Body mass index	C1305855	phenotype		Clinical Attribute
TMEM212	389177	Hypertensive disease	C0020538	group	Cardiovascular Diseases	Disease or Syndrome
TMEM212	389177	Respiratory Function Tests	C0035227	phenotype		Diagnostic Procedure
TMEM212	389177	Tonometry	C0040420	phenotype		Diagnostic Procedure
CXCL10	3627	Hashimoto Disease	C0677607	disease	Endocrine System Diseases	Disease or Syndrome
CXCL10	3627	Breast Carcinoma	C0678222	disease	Neoplasms; Skin and Connective Tissue Diseases	Neoplastic Process
CXCL10	3627	Liver carcinoma	C2239176	disease	Digestive System Diseases; Neoplasms	Neoplastic Process
MMP13	4322	Colorectal Carcinoma	C0009402	disease	Digestive System Diseases; Neoplasms	Neoplastic Process
MMP13	4322	Malignant neoplasm of lung	C0242379	disease	Neoplasms; Respiratory Tract Diseases	Neoplastic Process
MMP13	4322	Primary malignant neoplasm of lung	C1306460	disease	Neoplasms; Respiratory Tract Diseases	Neoplastic Process
ROS1	6098	Inflammatory Myofibroblastic Tumor	C0334121	disease	Pathological Conditions, Signs and Symptoms	Neoplastic Process
ROS1	6098	Malignant neoplasm of prostate	C0376358	disease	Neoplasms; Male Urogenital Diseases	Neoplastic Process
ROS1	6098	Prostate carcinoma	C0600139	disease	Neoplasms; Male Urogenital Diseases	Neoplastic Process
LRRK2	120892	Motor symptoms	C0426980	phenotype		Sign or Symptom
CXCL10	3627	Lupus Nephritis	C0024143	disease	Female Urogenital Diseases and Pregnancy Complications; Skin and Connective Tissue Diseases; Male Urogenital Diseases; Immune System Diseases	Disease or Syndrome
CXCL10	3627	Fibrosis, Liver	C0239946	disease	Pathological Conditions, Signs and Symptoms; Digestive System Diseases	Disease or Syndrome
CXCL10	3627	Rhinovirus infection	C0276447	disease	Infections	Disease or Syndrome
CXCL10	3627	Autoimmune thyroiditis	C0920350	disease	Immune System Diseases; Endocrine System Diseases	Disease or Syndrome
CXCL10	3627	Pseudohyperkalemia Cardiff	C1861453	disease	Nutritional and Metabolic Diseases	Disease or Syndrome
MMP13	4322	Osteoarthritis, Knee	C0409959	disease	Musculoskeletal Diseases	Disease or Syndrome
MMP13	4322	Malignant neoplasm of colon and/or rectum	C4722085	disease		Neoplastic Process
ROS1	6098	Malignant tumor of colon	C0007102	disease	Digestive System Diseases; Neoplasms	Neoplastic Process
ROS1	6098	Diabetes	C0011847	disease	Endocrine System Diseases	Disease or Syndrome
ROS1	6098	Pneumonia	C0032285	disease	Infections; Respiratory Tract Diseases	Disease or Syndrome
ROS1	6098	Cholangiocarcinoma	C0206698	disease	Neoplasms	Neoplastic Process
LRRK2	120892	Leprosy	C0023343	disease	Infections	Disease or Syndrome
LRRK2	120892	Essential Tremor	C0270736	disease	Nervous System Diseases	Disease or Syndrome
AGTR2	186	Myocardial Infarction	C0027051	disease	Pathological Conditions, Signs and Symptoms; Cardiovascular Diseases	Disease or Syndrome
CXCL10	3627	Colorectal Carcinoma	C0009402	disease	Digestive System Diseases; Neoplasms	Neoplastic Process
CXCL10	3627	Graves Disease	C0018213	disease	Eye Diseases; Immune System Diseases; Endocrine System Diseases	Disease or Syndrome
CXCL10	3627	Hepatitis	C0019158	group	Digestive System Diseases	Disease or Syndrome
CXCL10	3627	Liver diseases	C0023895	group	Digestive System Diseases	Disease or Syndrome
CXCL10	3627	Pneumonia	C0032285	disease	Infections; Respiratory Tract Diseases	Disease or Syndrome
CXCL10	3627	Sjogren's Syndrome	C1527336	disease	Eye Diseases; Skin and Connective Tissue Diseases; Musculoskeletal Diseases; Immune System Diseases; Stomatognathic Diseases	Disease or Syndrome
MMP13	4322	Carcinoma	C0007097	group	Neoplasms	Neoplastic Process
MMP13	4322	Osteosarcoma	C0029463	disease	Neoplasms	Neoplastic Process
MMP13	4322	Osteosarcoma of bone	C0585442	disease	Neoplasms	Neoplastic Process
MMP13	4322	Secondary malignant neoplasm of lymph node	C0686619	disease	Pathological Conditions, Signs and Symptoms; Neoplasms	Neoplastic Process
MMP13	4322	Childhood Osteosarcoma	C1332986	disease	Neoplasms	Neoplastic Process
ROS1	6098	Arteriosclerosis	C0003850	disease	Cardiovascular Diseases	Disease or Syndrome
ROS1	6098	Atherosclerosis	C0004153	disease	Cardiovascular Diseases	Disease or Syndrome
ROS1	6098	Cardiovascular Diseases	C0007222	group	Cardiovascular Diseases	Disease or Syndrome
ROS1	6098	Parkinson Disease	C0030567	disease	Nervous System Diseases	Disease or Syndrome
ROS1	6098	Septicemia	C0036690	disease	Pathological Conditions, Signs and Symptoms; Infections	Disease or Syndrome
ROS1	6098	Metastatic malignant neoplasm to brain	C0220650	disease	Pathological Conditions, Signs and Symptoms; Neoplasms; Nervous System Diseases	Neoplastic Process
ROS1	6098	Sepsis	C0243026	disease	Pathological Conditions, Signs and Symptoms; Infections	Disease or Syndrome
ROS1	6098	Metastatic non-small cell lung cancer	C0278987	disease	Neoplasms	Neoplastic Process
ROS1	6098	Pneumonitis	C3714636	disease	Infections; Respiratory Tract Diseases	Disease or Syndrome
SCN7A	6332	Kidney Failure, Acute	C0022660	disease	Female Urogenital Diseases and Pregnancy Complications; Male Urogenital Diseases	Disease or Syndrome
LRRK2	120892	Progressive supranuclear palsy	C0038868	disease	Pathological Conditions, Signs and Symptoms; Eye Diseases; Nervous System Diseases	Disease or Syndrome
LRRK2	120892	Hyperactive behavior	C0424295	phenotype	Pathological Conditions, Signs and Symptoms; Nervous System Diseases	Mental or Behavioral Dysfunction
LRRK2	120892	Multiple Chronic Conditions	C3266262	disease	Pathological Conditions, Signs and Symptoms	Disease or Syndrome
LRRK2	120892	Autosomal dominant late onset Parkinson disease	C4274355	disease	Nervous System Diseases	Disease or Syndrome
AGTR2	186	Cardiovascular Diseases	C0007222	group	Cardiovascular Diseases	Disease or Syndrome
AGTR2	186	Neoplasms	C0027651	group	Neoplasms	Neoplastic Process
AGTR2	186	Neuralgia	C0027796	phenotype	Pathological Conditions, Signs and Symptoms; Nervous System Diseases	Sign or Symptom
CXCL10	3627	Alzheimer's Disease	C0002395	disease	Nervous System Diseases; Mental Disorders	Disease or Syndrome
CXCL10	3627	Arthritis	C0003864	disease	Musculoskeletal Diseases	Disease or Syndrome
CXCL10	3627	Diabetes	C0011847	disease	Endocrine System Diseases	Disease or Syndrome
CXCL10	3627	Diabetes Mellitus	C0011849	group	Nutritional and Metabolic Diseases; Endocrine System Diseases	Disease or Syndrome
CXCL10	3627	Hepatitis A	C0019159	disease	Digestive System Diseases; Infections	Disease or Syndrome
CXCL10	3627	Degenerative polyarthritis	C0029408	disease	Musculoskeletal Diseases	Disease or Syndrome
CXCL10	3627	Systemic Scleroderma	C0036421	disease	Skin and Connective Tissue Diseases	Disease or Syndrome
CXCL10	3627	Tumor Progression	C0178874	phenotype	Pathological Conditions, Signs and Symptoms	Neoplastic Process
CXCL10	3627	Infection	C3714514	group	Infections	Pathologic Function
CXCL10	3627	Fatty Liver Disease	C4529962	disease		Disease or Syndrome
MMP13	4322	Arteriosclerosis	C0003850	disease	Cardiovascular Diseases	Disease or Syndrome
MMP13	4322	Atherosclerosis	C0004153	disease	Cardiovascular Diseases	Disease or Syndrome
MMP13	4322	Stomach Carcinoma	C0699791	disease	Digestive System Diseases; Neoplasms	Neoplastic Process
MMP13	4322	Liver carcinoma	C2239176	disease	Digestive System Diseases; Neoplasms	Neoplastic Process
ROS1	6098	Carcinoma	C0007097	group	Neoplasms	Neoplastic Process
ROS1	6098	Squamous cell carcinoma	C0007137	disease	Neoplasms	Neoplastic Process
ROS1	6098	Hypertensive disease	C0020538	group	Cardiovascular Diseases	Disease or Syndrome
ROS1	6098	Osteosarcoma	C0029463	disease	Neoplasms	Neoplastic Process
ROS1	6098	Osteosarcoma of bone	C0585442	disease	Neoplasms	Neoplastic Process
ROS1	6098	Childhood Osteosarcoma	C1332986	disease	Neoplasms	Neoplastic Process
SCN7A	6332	Neoplasms	C0027651	group	Neoplasms	Neoplastic Process
SLC6A14	11254	Cystic Fibrosis	C0010674	disease	Congenital, Hereditary, and Neonatal Diseases and Abnormalities; Digestive System Diseases; Respiratory Tract Diseases	Disease or Syndrome
LRRK2	120892	Tauopathies	C0949664	group	Nervous System Diseases	Disease or Syndrome
AGTR2	186	Essential Hypertension	C0085580	disease	Cardiovascular Diseases	Disease or Syndrome
AGTR2	186	Carcinogenesis	C0596263	phenotype	Pathological Conditions, Signs and Symptoms; Neoplasms	Neoplastic Process
AGTR2	186	Cakut	C1968949	disease	Congenital, Hereditary, and Neonatal Diseases and Abnormalities; Female Urogenital Diseases and Pregnancy Complications; Male Urogenital Diseases	Disease or Syndrome
CXCL10	3627	Eczema	C0013595	disease	Skin and Connective Tissue Diseases	Disease or Syndrome
CXCL10	3627	Glioma	C0017638	disease	Neoplasms	Neoplastic Process
CXCL10	3627	Inflammatory Bowel Diseases	C0021390	group	Digestive System Diseases	Disease or Syndrome
CXCL10	3627	Liver Cirrhosis	C0023890	disease	Pathological Conditions, Signs and Symptoms; Digestive System Diseases	Disease or Syndrome
CXCL10	3627	Lung diseases	C0024115	group	Respiratory Tract Diseases	Disease or Syndrome
CXCL10	3627	Psoriasis	C0033860	disease	Skin and Connective Tissue Diseases	Disease or Syndrome
CXCL10	3627	Primary Sjögren's syndrome	C0151449	disease	Eye Diseases; Skin and Connective Tissue Diseases; Musculoskeletal Diseases; Immune System Diseases; Stomatognathic Diseases	Disease or Syndrome
CXCL10	3627	Complete atrioventricular block	C0151517	disease	Pathological Conditions, Signs and Symptoms; Cardiovascular Diseases	Disease or Syndrome
CXCL10	3627	Severe Acute Respiratory Syndrome	C1175175	disease	Infections; Respiratory Tract Diseases	Disease or Syndrome
CXCL10	3627	ANOPHTHALMIA AND PULMONARY HYPOPLASIA	C1832661	disease	Congenital, Hereditary, and Neonatal Diseases and Abnormalities; Eye Diseases; Respiratory Tract Diseases	Disease or Syndrome
CXCL10	3627	Malignant neoplasm of colon and/or rectum	C4722085	disease		Neoplastic Process
MMP13	4322	melanoma	C0025202	disease	Neoplasms	Neoplastic Process
MMP13	4322	Secondary malignant neoplasm of lung	C0153676	disease	Neoplasms; Respiratory Tract Diseases	Neoplastic Process
MMP13	4322	Intervertebral Disc Degeneration	C0158266	disease	Musculoskeletal Diseases	Disease or Syndrome
MMP13	4322	Fibrosis, Liver	C0239946	disease	Pathological Conditions, Signs and Symptoms; Digestive System Diseases	Disease or Syndrome
MMP13	4322	Carcinoma of bladder	C0699885	disease	Neoplasms; Female Urogenital Diseases and Pregnancy Complications; Male Urogenital Diseases	Neoplastic Process
MMP13	4322	Mammary Neoplasms	C1458155	group	Neoplasms; Skin and Connective Tissue Diseases	Neoplastic Process
ROS1	6098	Rheumatoid Arthritis	C0003873	disease	Skin and Connective Tissue Diseases; Musculoskeletal Diseases; Immune System Diseases	Disease or Syndrome
ROS1	6098	Diabetes Mellitus, Non-Insulin-Dependent	C0011860	disease	Nutritional and Metabolic Diseases; Endocrine System Diseases	Disease or Syndrome
ROS1	6098	Diabetic Nephropathy	C0011881	disease	Female Urogenital Diseases and Pregnancy Complications; Male Urogenital Diseases; Endocrine System Diseases	Disease or Syndrome
ROS1	6098	Fever	C0015967	phenotype	Pathological Conditions, Signs and Symptoms	Sign or Symptom
ROS1	6098	Congestive heart failure	C0018802	disease	Cardiovascular Diseases	Disease or Syndrome
ROS1	6098	Obesity	C0028754	disease	Pathological Conditions, Signs and Symptoms; Nutritional and Metabolic Diseases	Disease or Syndrome
ROS1	6098	Iron Overload	C0282193	disease	Nutritional and Metabolic Diseases	Disease or Syndrome
ROS1	6098	Stomach Carcinoma	C0699791	disease	Digestive System Diseases; Neoplasms	Neoplastic Process
SCN7A	6332	Neuroblastoma	C0027819	disease	Neoplasms	Neoplastic Process
SCN7A	6332	Central neuroblastoma	C0700095	disease	Neoplasms; Nervous System Diseases	Neoplastic Process
SCN7A	6332	Childhood Neuroblastoma	C4086165	disease	Neoplasms	Neoplastic Process
LRRK2	120892	Frontotemporal dementia	C0338451	disease	Nutritional and Metabolic Diseases; Nervous System Diseases; Mental Disorders	Disease or Syndrome
LRRK2	120892	REM Sleep Behavior Disorder	C0751772	disease	Nervous System Diseases; Mental Disorders	Mental or Behavioral Dysfunction
AGTR2	186	Alzheimer's Disease	C0002395	disease	Nervous System Diseases; Mental Disorders	Disease or Syndrome
AGTR2	186	Diabetes Mellitus	C0011849	group	Nutritional and Metabolic Diseases; Endocrine System Diseases	Disease or Syndrome
AGTR2	186	Coronary Artery Disease	C1956346	disease	Cardiovascular Diseases	Disease or Syndrome
AGTR2	186	Intellectual Disability	C3714756	group	Pathological Conditions, Signs and Symptoms; Nervous System Diseases; Mental Disorders; Behavior and Behavior Mechanisms	Mental or Behavioral Dysfunction
CXCL10	3627	Squamous cell carcinoma	C0007137	disease	Neoplasms	Neoplastic Process
CXCL10	3627	Chorioamnionitis	C0008495	phenotype	Congenital, Hereditary, and Neonatal Diseases and Abnormalities; Female Urogenital Diseases and Pregnancy Complications	Disease or Syndrome
CXCL10	3627	Cryoglobulinemia	C0010403	disease	Immune System Diseases; Hemic and Lymphatic Diseases; Cardiovascular Diseases	Disease or Syndrome
CXCL10	3627	Cytomegalovirus Infections	C0010823	group	Infections	Disease or Syndrome
CXCL10	3627	Dengue Fever	C0011311	disease	Infections	Disease or Syndrome
CXCL10	3627	Diabetes Mellitus, Non-Insulin-Dependent	C0011860	disease	Nutritional and Metabolic Diseases; Endocrine System Diseases	Disease or Syndrome
CXCL10	3627	Enterovirus Infections	C0014378	group	Infections	Disease or Syndrome
CXCL10	3627	Glioblastoma	C0017636	disease	Neoplasms	Neoplastic Process
CXCL10	3627	Kidney Diseases	C0022658	group	Female Urogenital Diseases and Pregnancy Complications; Male Urogenital Diseases	Disease or Syndrome
CXCL10	3627	Leishmaniasis	C0023281	disease	Infections; Skin and Connective Tissue Diseases	Disease or Syndrome
CXCL10	3627	Malaria, Cerebral	C0024534	disease	Infections; Nervous System Diseases	Disease or Syndrome
CXCL10	3627	Pain	C0030193	phenotype	Pathological Conditions, Signs and Symptoms	Sign or Symptom
CXCL10	3627	Cerebrovascular accident	C0038454	group	Nervous System Diseases; Cardiovascular Diseases	Disease or Syndrome
CXCL10	3627	Dermatitis, Allergic Contact	C0162820	disease	Skin and Connective Tissue Diseases; Immune System Diseases	Disease or Syndrome
CXCL10	3627	bone destruction	C0238790	disease		Disease or Syndrome
CXCL10	3627	Respiratory syncytial virus (RSV) infection in conditions classified elsewhere and of unspecified site	C0375023	disease		Disease or Syndrome
CXCL10	3627	Diabetic macular edema	C0730285	disease	Eye Diseases; Endocrine System Diseases; Cardiovascular Diseases	Disease or Syndrome
CXCL10	3627	Tumor Immunity	C1519680	phenotype	Pathological Conditions, Signs and Symptoms	Disease or Syndrome
CXCL10	3627	Glioblastoma Multiforme	C1621958	disease	Neoplasms	Neoplastic Process
CXCL10	3627	Cirrhosis	C1623038	disease	Pathological Conditions, Signs and Symptoms	Disease or Syndrome
CXCL10	3627	Steatohepatitis	C2711227	disease	Digestive System Diseases	Disease or Syndrome
MMP13	4322	Malignant neoplasm of urinary bladder	C0005684	disease	Neoplasms; Female Urogenital Diseases and Pregnancy Complications; Male Urogenital Diseases	Neoplastic Process
MMP13	4322	Bladder Neoplasm	C0005695	disease	Neoplasms; Female Urogenital Diseases and Pregnancy Complications; Male Urogenital Diseases	Neoplastic Process
MMP13	4322	Malignant neoplasm of stomach	C0024623	disease	Digestive System Diseases; Neoplasms	Neoplastic Process
MMP13	4322	Prostate carcinoma	C0600139	disease	Neoplasms; Male Urogenital Diseases	Neoplastic Process
MMP13	4322	Carcinoma, Basal Cell	C4721806	disease	Neoplasms	Neoplastic Process
ROS1	6098	Malignant neoplasm of stomach	C0024623	disease	Digestive System Diseases; Neoplasms	Neoplastic Process
ROS1	6098	Myocardial Infarction	C0027051	disease	Pathological Conditions, Signs and Symptoms; Cardiovascular Diseases	Disease or Syndrome
ROS1	6098	Degenerative polyarthritis	C0029408	disease	Musculoskeletal Diseases	Disease or Syndrome
ROS1	6098	Secondary malignant neoplasm of lung	C0153676	disease	Neoplasms; Respiratory Tract Diseases	Neoplastic Process
ROS1	6098	Tumor Progression	C0178874	phenotype	Pathological Conditions, Signs and Symptoms	Neoplastic Process
ROS1	6098	Adult Liver Carcinoma	C0220630	disease	Digestive System Diseases; Neoplasms	Neoplastic Process
ROS1	6098	Liver and Intrahepatic Biliary Tract Carcinoma	C0279000	disease	Digestive System Diseases; Neoplasms	Neoplastic Process
ROS1	6098	Malignant neoplasm of liver	C0345904	disease	Digestive System Diseases; Neoplasms	Neoplastic Process
ROS1	6098	Secondary Neoplasm	C2939419	group	Pathological Conditions, Signs and Symptoms; Neoplasms	Neoplastic Process
ROS1	6098	Carcinoma, Ovarian Epithelial	C4721610	disease	Neoplasms; Female Urogenital Diseases and Pregnancy Complications; Endocrine System Diseases	Neoplastic Process
ROS1	6098	Malignant neoplasm of colon and/or rectum	C4722085	disease		Neoplastic Process
CALCRL	10203	Neoplasms	C0027651	group	Neoplasms	Neoplastic Process
LRRK2	120892	Symphysis Pubis Dysfunction	C2609259	disease	Pathological Conditions, Signs and Symptoms	Disease or Syndrome
AGTR2	186	Kidney Diseases	C0022658	group	Female Urogenital Diseases and Pregnancy Complications; Male Urogenital Diseases	Disease or Syndrome
AGTR2	186	Mental Retardation	C0025362	disease	Pathological Conditions, Signs and Symptoms; Congenital, Hereditary, and Neonatal Diseases and Abnormalities; Nervous System Diseases; Mental Disorders; Behavior and Behavior Mechanisms	Mental or Behavioral Dysfunction
AGTR2	186	Polycystic Ovary Syndrome	C0032460	disease	Neoplasms; Female Urogenital Diseases and Pregnancy Complications; Endocrine System Diseases	Disease or Syndrome
AGTR2	186	Vesico-Ureteral Reflux	C0042580	disease	Female Urogenital Diseases and Pregnancy Complications; Male Urogenital Diseases	Disease or Syndrome
CXCL10	3627	Anemia of chronic disease	C0002873	phenotype	Hemic and Lymphatic Diseases	Disease or Syndrome
CXCL10	3627	Astrocytoma	C0004114	disease	Neoplasms	Neoplastic Process
CXCL10	3627	Non-Small Cell Lung Carcinoma	C0007131	disease	Neoplasms; Respiratory Tract Diseases	Neoplastic Process
CXCL10	3627	Renal Cell Carcinoma	C0007134	disease	Neoplasms; Female Urogenital Diseases and Pregnancy Complications; Male Urogenital Diseases	Neoplastic Process
CXCL10	3627	Central Nervous System Infection	C0007684	group	Infections; Nervous System Diseases	Disease or Syndrome
CXCL10	3627	Ulcerative Colitis	C0009324	disease	Digestive System Diseases	Disease or Syndrome
CXCL10	3627	Encephalomyelitis	C0014070	disease	Infections; Nervous System Diseases	Disease or Syndrome
CXCL10	3627	Endometriosis	C0014175	disease	Female Urogenital Diseases and Pregnancy Complications	Disease or Syndrome
CXCL10	3627	Hodgkin Disease	C0019829	disease	Neoplasms; Immune System Diseases; Hemic and Lymphatic Diseases	Neoplastic Process
CXCL10	3627	Immunologic Deficiency Syndromes	C0021051	group	Immune System Diseases	Disease or Syndrome
CXCL10	3627	Inflammation	C0021368	phenotype	Pathological Conditions, Signs and Symptoms	Pathologic Function
CXCL10	3627	Leishmaniasis, Cutaneous	C0023283	disease	Infections; Skin and Connective Tissue Diseases	Disease or Syndrome
CXCL10	3627	Lupus Erythematosus, Discoid	C0024138	disease	Skin and Connective Tissue Diseases	Disease or Syndrome
CXCL10	3627	Multiple Myeloma	C0026764	disease	Neoplasms; Immune System Diseases; Hemic and Lymphatic Diseases; Cardiovascular Diseases	Neoplastic Process
CXCL10	3627	Neuralgia	C0027796	phenotype	Pathological Conditions, Signs and Symptoms; Nervous System Diseases	Sign or Symptom
CXCL10	3627	Obesity	C0028754	disease	Pathological Conditions, Signs and Symptoms; Nutritional and Metabolic Diseases	Disease or Syndrome
CXCL10	3627	Periodontal Diseases	C0031090	group	Stomatognathic Diseases	Disease or Syndrome
CXCL10	3627	Dermatologic disorders	C0037274	group	Skin and Connective Tissue Diseases	Disease or Syndrome
CXCL10	3627	Lichen Planus, Oral	C0206139	disease	Skin and Connective Tissue Diseases; Stomatognathic Diseases	Disease or Syndrome
CXCL10	3627	Pancreatic carcinoma	C0235974	disease	Digestive System Diseases; Neoplasms; Endocrine System Diseases	Neoplastic Process
CXCL10	3627	Age related macular degeneration	C0242383	disease	Eye Diseases	Disease or Syndrome
CXCL10	3627	Coinfection	C0275524	phenotype	Infections	Disease or Syndrome
CXCL10	3627	Adult Glioblastoma	C0278878	disease	Neoplasms	Neoplastic Process
CXCL10	3627	Conventional (Clear Cell) Renal Cell Carcinoma	C0279702	disease	Neoplasms; Female Urogenital Diseases and Pregnancy Complications; Male Urogenital Diseases	Neoplastic Process
CXCL10	3627	Childhood Glioblastoma	C0280474	disease	Neoplasms	Neoplastic Process
CXCL10	3627	Thyroid associated opthalmopathies	C0339143	disease	Congenital, Hereditary, and Neonatal Diseases and Abnormalities; Eye Diseases; Immune System Diseases; Endocrine System Diseases	Disease or Syndrome
CXCL10	3627	Malignant neoplasm of pancreas	C0346647	disease	Digestive System Diseases; Neoplasms; Endocrine System Diseases	Neoplastic Process
CXCL10	3627	Non-alcoholic Fatty Liver Disease	C0400966	disease	Digestive System Diseases	Disease or Syndrome
CXCL10	3627	Cytokine storm	C0919747	disease		Disease or Syndrome
CXCL10	3627	Lymphocytic infiltration	C1262091	disease		Disease or Syndrome
CXCL10	3627	Avellino corneal dystrophy	C1275685	disease	Congenital, Hereditary, and Neonatal Diseases and Abnormalities; Eye Diseases	Disease or Syndrome
CXCL10	3627	Mammary Neoplasms	C1458155	group	Neoplasms; Skin and Connective Tissue Diseases	Neoplastic Process
CXCL10	3627	Idiopathic Pulmonary Fibrosis	C1800706	disease	Respiratory Tract Diseases	Disease or Syndrome
CXCL10	3627	Coronary Artery Disease	C1956346	disease	Cardiovascular Diseases	Disease or Syndrome
CXCL10	3627	Influenza A	C2062441	disease		Disease or Syndrome
CXCL10	3627	Nonalcoholic Steatohepatitis	C3241937	disease	Digestive System Diseases	Disease or Syndrome
CXCL10	3627	Amyloidosis cutis dyschromia	C4554601	disease	Congenital, Hereditary, and Neonatal Diseases and Abnormalities; Nutritional and Metabolic Diseases; Skin and Connective Tissue Diseases	Disease or Syndrome
CXCL10	3627	Blood spots	C4732730	disease		Disease or Syndrome
MMP13	4322	Adenocarcinoma	C0001418	group	Neoplasms	Neoplastic Process
MMP13	4322	External exotoses	C0015302	disease	Musculoskeletal Diseases	Disease or Syndrome
MMP13	4322	Inflammatory Bowel Diseases	C0021390	group	Digestive System Diseases	Disease or Syndrome
MMP13	4322	Liver Cirrhosis	C0023890	disease	Pathological Conditions, Signs and Symptoms; Digestive System Diseases	Disease or Syndrome
MMP13	4322	Osteoporosis	C0029456	disease	Nutritional and Metabolic Diseases; Musculoskeletal Diseases	Disease or Syndrome
MMP13	4322	Pain	C0030193	phenotype	Pathological Conditions, Signs and Symptoms	Sign or Symptom
MMP13	4322	B-Cell Lymphomas	C0079731	group	Neoplasms; Immune System Diseases; Hemic and Lymphatic Diseases	Neoplastic Process
MMP13	4322	Intervertebral disc disorder	C0158252	group	Pathological Conditions, Signs and Symptoms; Musculoskeletal Diseases	Disease or Syndrome
MMP13	4322	Aortic Aneurysm, Abdominal	C0162871	disease	Cardiovascular Diseases	Disease or Syndrome
MMP13	4322	Gastrointestinal Carcinoid Tumor	C0220620	disease	Digestive System Diseases; Neoplasms; Endocrine System Diseases	Neoplastic Process
MMP13	4322	Squamous cell carcinoma of esophagus	C0279626	disease	Digestive System Diseases; Neoplasms	Neoplastic Process
MMP13	4322	Carcinogenesis	C0596263	phenotype	Pathological Conditions, Signs and Symptoms; Neoplasms	Neoplastic Process
MMP13	4322	Osteophyte	C1956089	disease	Musculoskeletal Diseases	Disease or Syndrome
MMP13	4322	Collagenopathy, type 2 alpha 1	C2931073	disease	Congenital, Hereditary, and Neonatal Diseases and Abnormalities; Musculoskeletal Diseases	Disease or Syndrome
MMP13	4322	Nasopharyngeal carcinoma	C2931822	disease	Neoplasms; Stomatognathic Diseases; Otorhinolaryngologic Diseases	Neoplastic Process
ROS1	6098	Amyloidosis	C0002726	disease	Nutritional and Metabolic Diseases	Disease or Syndrome
ROS1	6098	Cerebral Infarction	C0007785	disease	Pathological Conditions, Signs and Symptoms; Nervous System Diseases; Cardiovascular Diseases	Disease or Syndrome
ROS1	6098	Coronary Arteriosclerosis	C0010054	disease	Cardiovascular Diseases	Disease or Syndrome
ROS1	6098	Heart failure	C0018801	disease	Cardiovascular Diseases	Disease or Syndrome
ROS1	6098	leukemia	C0023418	disease	Neoplasms	Neoplastic Process
ROS1	6098	Lung diseases	C0024115	group	Respiratory Tract Diseases	Disease or Syndrome
ROS1	6098	Lung Neoplasms	C0024121	group	Neoplasms; Respiratory Tract Diseases	Neoplastic Process
ROS1	6098	Multiple Sclerosis	C0026769	disease	Immune System Diseases; Nervous System Diseases	Disease or Syndrome
ROS1	6098	Polycystic Ovary Syndrome	C0032460	disease	Neoplasms; Female Urogenital Diseases and Pregnancy Complications; Endocrine System Diseases	Disease or Syndrome
ROS1	6098	Dermatitis, Phototoxic	C0162830	disease	Skin and Connective Tissue Diseases	Disease or Syndrome
ROS1	6098	Solid Neoplasm	C0280100	phenotype	Neoplasms	Neoplastic Process
ROS1	6098	Psammomatous Meningioma	C0334607	disease	Neoplasms; Nervous System Diseases	Neoplastic Process
ROS1	6098	Childhood Leukemia	C1332977	disease	Neoplasms	Neoplastic Process
ROS1	6098	Cardiomyopathy, Familial Idiopathic	C1449563	disease	Cardiovascular Diseases	Disease or Syndrome
ROS1	6098	Progression of prostate cancer	C1739135	disease		Neoplastic Process
ROS1	6098	Influenza A	C2062441	disease		Disease or Syndrome
CALCRL	10203	Leukemia, Myelocytic, Acute	C0023467	disease	Neoplasms	Neoplastic Process
CALCRL	10203	Migraine Disorders	C0149931	group	Nervous System Diseases	Disease or Syndrome
SLC6A14	11254	Obesity	C0028754	disease	Pathological Conditions, Signs and Symptoms; Nutritional and Metabolic Diseases	Disease or Syndrome
LRRK2	120892	Amyotrophic Lateral Sclerosis	C0002736	disease	Nutritional and Metabolic Diseases; Nervous System Diseases	Disease or Syndrome
LRRK2	120892	Malignant neoplasm of skin	C0007114	disease	Neoplasms; Skin and Connective Tissue Diseases	Neoplastic Process
LRRK2	120892	Abnormal behavior	C0233514	phenotype	Behavior and Behavior Mechanisms	Mental or Behavioral Dysfunction
LRRK2	120892	Multiple System Atrophy	C0393571	phenotype	Nervous System Diseases	Pathologic Function
LRRK2	120892	Alzheimer Disease, Late Onset	C0494463	disease	Nervous System Diseases; Mental Disorders	Mental or Behavioral Dysfunction
LRRK2	120892	Frontotemporal Lobar Degeneration	C0751072	disease	Nutritional and Metabolic Diseases; Nervous System Diseases; Mental Disorders	Mental or Behavioral Dysfunction
LRRK2	120892	Mild cognitive disorder	C1270972	disease	Mental Disorders	Mental or Behavioral Dysfunction
LRRK2	120892	GRN-related frontotemporal dementia	C3811918	disease	Nutritional and Metabolic Diseases; Nervous System Diseases; Mental Disorders	Disease or Syndrome
LRRK2	120892	Mitochondrial abnormalities	C4020732	disease		Anatomical Abnormality
COL6A5	256076	Dermatitis, Atopic	C0011615	disease	Congenital, Hereditary, and Neonatal Diseases and Abnormalities; Skin and Connective Tissue Diseases; Immune System Diseases	Disease or Syndrome
COL6A5	256076	Eczema	C0013595	disease	Skin and Connective Tissue Diseases	Disease or Syndrome
AGTR2	186	Congenital Abnormality	C0000768	group	Congenital, Hereditary, and Neonatal Diseases and Abnormalities	Congenital Abnormality
AGTR2	186	Adrenal Gland Neoplasms	C0001624	group	Neoplasms; Endocrine System Diseases	Neoplastic Process
AGTR2	186	Arteriosclerosis	C0003850	disease	Cardiovascular Diseases	Disease or Syndrome
AGTR2	186	Atherosclerosis	C0004153	disease	Cardiovascular Diseases	Disease or Syndrome
AGTR2	186	Malignant neoplasm of breast	C0006142	disease	Neoplasms; Skin and Connective Tissue Diseases	Neoplastic Process
AGTR2	186	Malignant Neoplasms	C0006826	group	Neoplasms	Neoplastic Process
AGTR2	186	Coronary heart disease	C0010068	disease	Cardiovascular Diseases	Disease or Syndrome
AGTR2	186	Cystic Fibrosis	C0010674	disease	Congenital, Hereditary, and Neonatal Diseases and Abnormalities; Digestive System Diseases; Respiratory Tract Diseases	Disease or Syndrome
AGTR2	186	Diabetes	C0011847	disease	Endocrine System Diseases	Disease or Syndrome
AGTR2	186	Diabetes Mellitus, Insulin-Dependent	C0011854	disease	Nutritional and Metabolic Diseases; Immune System Diseases; Endocrine System Diseases	Disease or Syndrome
AGTR2	186	Endometriosis	C0014175	disease	Female Urogenital Diseases and Pregnancy Complications	Disease or Syndrome
AGTR2	186	IGA Glomerulonephritis	C0017661	disease	Female Urogenital Diseases and Pregnancy Complications; Male Urogenital Diseases; Immune System Diseases	Disease or Syndrome
AGTR2	186	Hyperglycemia	C0020456	disease	Nutritional and Metabolic Diseases	Disease or Syndrome
AGTR2	186	Premature Menopause	C0025322	disease	Female Urogenital Diseases and Pregnancy Complications	Disease or Syndrome
AGTR2	186	Pain	C0030193	phenotype	Pathological Conditions, Signs and Symptoms	Sign or Symptom
AGTR2	186	Pheochromocytoma	C0031511	disease	Neoplasms	Neoplastic Process
AGTR2	186	Tuberculosis	C0041296	disease	Infections	Disease or Syndrome
AGTR2	186	Ovarian Failure, Premature	C0085215	disease	Female Urogenital Diseases and Pregnancy Complications; Endocrine System Diseases	Disease or Syndrome
AGTR2	186	Malignant neoplasm of lung	C0242379	disease	Neoplasms; Respiratory Tract Diseases	Neoplastic Process
AGTR2	186	Malignant neoplasm of prostate	C0376358	disease	Neoplasms; Male Urogenital Diseases	Neoplastic Process
AGTR2	186	Neuropathy	C0442874	group	Nervous System Diseases	Disease or Syndrome
AGTR2	186	Dilatation of ureter	C0521620	disease	Female Urogenital Diseases and Pregnancy Complications; Male Urogenital Diseases	Anatomical Abnormality
AGTR2	186	Agnosia for Pain	C0563625	disease	Pathological Conditions, Signs and Symptoms; Nervous System Diseases; Behavior and Behavior Mechanisms	Mental or Behavioral Dysfunction
AGTR2	186	Prostate carcinoma	C0600139	disease	Neoplasms; Male Urogenital Diseases	Neoplastic Process
AGTR2	186	Breast Carcinoma	C0678222	disease	Neoplasms; Skin and Connective Tissue Diseases	Neoplastic Process
AGTR2	186	Carcinoma of lung	C0684249	disease	Neoplasms; Respiratory Tract Diseases	Neoplastic Process
AGTR2	186	Ischemic stroke	C0948008	disease	Nervous System Diseases; Cardiovascular Diseases	Disease or Syndrome
AGTR2	186	Tumor Cell Invasion	C1269955	phenotype		Neoplastic Process
AGTR2	186	Primary malignant neoplasm	C1306459	group	Neoplasms	Neoplastic Process
AGTR2	186	Primary malignant neoplasm of lung	C1306460	disease	Neoplasms; Respiratory Tract Diseases	Neoplastic Process
AGTR2	186	Premature coronary artery atherosclerosis	C1867743	phenotype	Cardiovascular Diseases	Disease or Syndrome
AGTR2	186	Tubulointerstitial fibrosis	C1969372	phenotype		Disease or Syndrome
AGTR2	186	Multicystic Dysplastic Kidney	C3714581	disease	Congenital, Hereditary, and Neonatal Diseases and Abnormalities; Female Urogenital Diseases and Pregnancy Complications; Male Urogenital Diseases	Disease or Syndrome
AGTR2	186	Megaureter	C4049615	disease		Congenital Abnormality
CXCL10	3627	Acquired Immunodeficiency Syndrome	C0001175	group	Infections; Immune System Diseases	Disease or Syndrome
CXCL10	3627	AIDS Dementia Complex	C0001849	disease	Infections; Immune System Diseases; Nervous System Diseases; Mental Disorders	Disease or Syndrome
CXCL10	3627	Aplastic Anemia	C0002874	disease	Hemic and Lymphatic Diseases	Disease or Syndrome
CXCL10	3627	Anemia, Sickle Cell	C0002895	disease	Congenital, Hereditary, and Neonatal Diseases and Abnormalities; Hemic and Lymphatic Diseases	Disease or Syndrome
CXCL10	3627	Arteriosclerosis	C0003850	disease	Cardiovascular Diseases	Disease or Syndrome
CXCL10	3627	Atherosclerosis	C0004153	disease	Cardiovascular Diseases	Disease or Syndrome
CXCL10	3627	Behcet Syndrome	C0004943	disease	Congenital, Hereditary, and Neonatal Diseases and Abnormalities; Eye Diseases; Skin and Connective Tissue Diseases; Stomatognathic Diseases; Cardiovascular Diseases	Disease or Syndrome
CXCL10	3627	Malignant neoplasm of urinary bladder	C0005684	disease	Neoplasms; Female Urogenital Diseases and Pregnancy Complications; Male Urogenital Diseases	Neoplastic Process
CXCL10	3627	Bladder Neoplasm	C0005695	disease	Neoplasms; Female Urogenital Diseases and Pregnancy Complications; Male Urogenital Diseases	Neoplastic Process
CXCL10	3627	Bronchiolitis Obliterans	C0006272	disease	Respiratory Tract Diseases	Disease or Syndrome
CXCL10	3627	Colitis	C0009319	disease	Digestive System Diseases	Disease or Syndrome
CXCL10	3627	Dermatomyositis	C0011633	disease	Skin and Connective Tissue Diseases; Musculoskeletal Diseases; Nervous System Diseases	Disease or Syndrome
CXCL10	3627	Diabetic Retinopathy	C0011884	disease	Eye Diseases; Endocrine System Diseases; Cardiovascular Diseases	Disease or Syndrome
CXCL10	3627	Japanese Encephalitis	C0014057	disease	Infections; Nervous System Diseases	Disease or Syndrome
CXCL10	3627	Encephalitis, St. Louis	C0014060	disease	Infections; Nervous System Diseases	Disease or Syndrome
CXCL10	3627	Erythema Chronicum Migrans	C0014740	disease	Infections; Skin and Connective Tissue Diseases	Disease or Syndrome
CXCL10	3627	Esophageal Neoplasms	C0014859	group	Digestive System Diseases; Neoplasms	Neoplastic Process
CXCL10	3627	Fatigue	C0015672	phenotype	Pathological Conditions, Signs and Symptoms	Sign or Symptom
CXCL10	3627	Glomerulonephritis	C0017658	disease	Female Urogenital Diseases and Pregnancy Complications; Male Urogenital Diseases	Disease or Syndrome
CXCL10	3627	Glossitis, Benign Migratory	C0017677	disease	Stomatognathic Diseases	Disease or Syndrome
CXCL10	3627	Heart failure	C0018801	disease	Cardiovascular Diseases	Disease or Syndrome
CXCL10	3627	Congestive heart failure	C0018802	disease	Cardiovascular Diseases	Disease or Syndrome
CXCL10	3627	Keratitis, Herpetic	C0019357	disease	Infections; Eye Diseases	Disease or Syndrome
CXCL10	3627	Hyperglycemia	C0020456	disease	Nutritional and Metabolic Diseases	Disease or Syndrome
CXCL10	3627	Leprosy	C0023343	disease	Infections	Disease or Syndrome
CXCL10	3627	leukemia	C0023418	disease	Neoplasms	Neoplastic Process
CXCL10	3627	Lupus Vulgaris	C0024131	disease	Infections; Skin and Connective Tissue Diseases	Disease or Syndrome
CXCL10	3627	Lymphocytic Choriomeningitis	C0024266	disease	Infections; Nervous System Diseases	Disease or Syndrome
CXCL10	3627	Lymphohistiocytosis, Hemophagocytic	C0024291	disease	Hemic and Lymphatic Diseases	Disease or Syndrome
CXCL10	3627	Lymphoma	C0024299	group	Neoplasms; Immune System Diseases; Hemic and Lymphatic Diseases	Neoplastic Process
CXCL10	3627	Malignant neoplasm of stomach	C0024623	disease	Digestive System Diseases; Neoplasms	Neoplastic Process
CXCL10	3627	Meningitis	C0025289	disease	Nervous System Diseases	Disease or Syndrome
CXCL10	3627	Myasthenia Gravis	C0026896	disease	Neoplasms; Immune System Diseases; Nervous System Diseases	Disease or Syndrome
CXCL10	3627	Myocardial Infarction	C0027051	disease	Pathological Conditions, Signs and Symptoms; Cardiovascular Diseases	Disease or Syndrome
CXCL10	3627	Respiratory Syncytial Virus Infections	C0035235	group	Infections	Disease or Syndrome
CXCL10	3627	Sarcoidosis	C0036202	disease	Hemic and Lymphatic Diseases	Disease or Syndrome
CXCL10	3627	Septicemia	C0036690	disease	Pathological Conditions, Signs and Symptoms; Infections	Disease or Syndrome
CXCL10	3627	Situs Inversus	C0037221	disease	Congenital, Hereditary, and Neonatal Diseases and Abnormalities	Congenital Abnormality
CXCL10	3627	Thyroiditis	C0040147	disease	Endocrine System Diseases	Disease or Syndrome
CXCL10	3627	Vasculitis	C0042384	disease	Cardiovascular Diseases	Disease or Syndrome
CXCL10	3627	Vitiligo	C0042900	disease	Skin and Connective Tissue Diseases	Disease or Syndrome
CXCL10	3627	Lymphoma, T-Cell, Cutaneous	C0079773	disease	Neoplasms; Immune System Diseases; Hemic and Lymphatic Diseases	Neoplastic Process
CXCL10	3627	Bacterial Vaginosis	C0085166	disease	Female Urogenital Diseases and Pregnancy Complications; Infections	Disease or Syndrome
CXCL10	3627	Adult-Onset Still Disease	C0085253	disease	Skin and Connective Tissue Diseases; Musculoskeletal Diseases; Immune System Diseases	Disease or Syndrome
CXCL10	3627	Pancreatitis, Chronic	C0149521	disease	Digestive System Diseases	Disease or Syndrome
CXCL10	3627	Epstein-Barr Virus Infections	C0149678	group	Infections	Disease or Syndrome
CXCL10	3627	Active tuberculosis	C0151332	disease	Infections	Disease or Syndrome
CXCL10	3627	Esophageal carcinoma	C0152018	disease	Digestive System Diseases; Neoplasms	Neoplastic Process
CXCL10	3627	Lung Diseases, Interstitial	C0206062	group	Respiratory Tract Diseases	Disease or Syndrome
CXCL10	3627	Adult Hodgkin Lymphoma	C0220597	disease	Neoplasms; Immune System Diseases; Hemic and Lymphatic Diseases	Neoplastic Process
CXCL10	3627	Uveal melanoma	C0220633	disease	Neoplasms; Eye Diseases	Neoplastic Process
CXCL10	3627	Childhood Hodgkin Lymphoma	C0220644	disease	Neoplasms; Immune System Diseases; Hemic and Lymphatic Diseases	Neoplastic Process
CXCL10	3627	Adult type dermatomyositis	C0221056	disease	Skin and Connective Tissue Diseases; Musculoskeletal Diseases; Nervous System Diseases	Disease or Syndrome
CXCL10	3627	Papillary thyroid carcinoma	C0238463	disease	Neoplasms; Endocrine System Diseases	Neoplastic Process
CXCL10	3627	Autoimmune Chronic Hepatitis	C0241910	disease	Digestive System Diseases; Immune System Diseases	Disease or Syndrome
CXCL10	3627	Autoimmune thrombocytopenia	C0242584	disease	Immune System Diseases; Hemic and Lymphatic Diseases	Disease or Syndrome
CXCL10	3627	Hantavirus Infections	C0242994	group	Infections	Disease or Syndrome
CXCL10	3627	Sepsis	C0243026	disease	Pathological Conditions, Signs and Symptoms; Infections	Disease or Syndrome
CXCL10	3627	Thrombocytopenia due to platelet alloimmunization	C0272286	disease	Hemic and Lymphatic Diseases	Disease or Syndrome
CXCL10	3627	Zika Virus Infection	C0276289	disease	Infections	Disease or Syndrome
CXCL10	3627	Acute type B viral hepatitis	C0276609	disease	Digestive System Diseases; Infections	Disease or Syndrome
CXCL10	3627	Impaired cognition	C0338656	disease	Mental Disorders	Mental or Behavioral Dysfunction
CXCL10	3627	Prediabetes syndrome	C0362046	disease	Nutritional and Metabolic Diseases; Endocrine System Diseases	Disease or Syndrome
CXCL10	3627	Immune thrombocytopenic purpura	C0398650	disease	Pathological Conditions, Signs and Symptoms; Immune System Diseases; Hemic and Lymphatic Diseases	Disease or Syndrome
CXCL10	3627	Acute hepatitis C	C0400914	disease	Digestive System Diseases; Infections	Disease or Syndrome
CXCL10	3627	Osteoarthritis, Knee	C0409959	disease	Musculoskeletal Diseases	Disease or Syndrome
CXCL10	3627	Lupus Erythematosus	C0409974	disease	Pathological Conditions, Signs and Symptoms; Skin and Connective Tissue Diseases; Immune System Diseases	Disease or Syndrome
CXCL10	3627	Mixed cryoglobulinemia	C0543697	disease	Immune System Diseases; Hemic and Lymphatic Diseases; Cardiovascular Diseases	Disease or Syndrome
CXCL10	3627	Malignant neoplasm of esophagus	C0546837	disease	Digestive System Diseases; Neoplasms	Neoplastic Process
CXCL10	3627	Aqueous Humor Disorders	C0595936	disease	Eye Diseases	Disease or Syndrome
CXCL10	3627	Carcinogenesis	C0596263	phenotype	Pathological Conditions, Signs and Symptoms; Neoplasms	Neoplastic Process
CXCL10	3627	Progressive Neoplastic Disease	C0677932	phenotype		Neoplastic Process
CXCL10	3627	Stomach Carcinoma	C0699791	disease	Digestive System Diseases; Neoplasms	Neoplastic Process
CXCL10	3627	Carcinoma of bladder	C0699885	disease	Neoplasms; Female Urogenital Diseases and Pregnancy Complications; Male Urogenital Diseases	Neoplastic Process
CXCL10	3627	Chronic infection with HIV	C0853112	disease		Disease or Syndrome
CXCL10	3627	Endothelial dysfunction	C0856169	phenotype		Disease or Syndrome
CXCL10	3627	Mumps virus infection	C0858009	disease		Disease or Syndrome
CXCL10	3627	Chronic graft-versus-host disease	C0867389	disease	Immune System Diseases	Disease or Syndrome
CXCL10	3627	Macrophage Activation Syndrome	C1096155	disease	Immune System Diseases	Disease or Syndrome
CXCL10	3627	HIV disease progression	C1141957	disease		Disease or Syndrome
CXCL10	3627	Childhood Leukemia	C1332977	disease	Neoplasms	Neoplastic Process
CXCL10	3627	Tumor Angiogenesis	C1519670	phenotype	Pathological Conditions, Signs and Symptoms	Neoplastic Process
CXCL10	3627	tumor vasculature	C1658953	phenotype		Neoplastic Process
CXCL10	3627	Chromosome 11p11.2 Deletion Syndrome	C1832588	disease	Pathological Conditions, Signs and Symptoms; Congenital, Hereditary, and Neonatal Diseases and Abnormalities; Neoplasms; Musculoskeletal Diseases	Disease or Syndrome
CXCL10	3627	VITILIGO-ASSOCIATED MULTIPLE AUTOIMMUNE DISEASE SUSCEPTIBILITY 1 (finding)	C1847835	disease	Skin and Connective Tissue Diseases	Disease or Syndrome
CXCL10	3627	PEELING SKIN SYNDROME	C1849193	disease	Congenital, Hereditary, and Neonatal Diseases and Abnormalities; Skin and Connective Tissue Diseases	Disease or Syndrome
CXCL10	3627	CATARACT, ANTERIOR POLAR	C1855179	disease	Eye Diseases	Disease or Syndrome
CXCL10	3627	Parvovirus B19 (disease)	C1959635	disease		Disease or Syndrome
CXCL10	3627	HIV-1 infection	C2363741	disease		Disease or Syndrome
CXCL10	3627	Nasopharyngeal carcinoma	C2931822	disease	Neoplasms; Stomatognathic Diseases; Otorhinolaryngologic Diseases	Neoplastic Process
CXCL10	3627	Juvenile arthritis	C3495559	disease	Skin and Connective Tissue Diseases; Musculoskeletal Diseases; Immune System Diseases	Disease or Syndrome
CXCL10	3627	Progressive cGVHD	C3539781	disease		Disease or Syndrome
CXCL10	3627	Pneumonitis	C3714636	disease	Infections; Respiratory Tract Diseases	Disease or Syndrome
CXCL10	3627	Juvenile rheumatoid arthritis	C3714757	disease	Skin and Connective Tissue Diseases; Musculoskeletal Diseases; Immune System Diseases	Disease or Syndrome
CXCL10	3627	Acute-On-Chronic Liver Failure	C3850141	disease	Digestive System Diseases	Disease or Syndrome
CXCL10	3627	cervical cancer	C4048328	disease	Neoplasms; Female Urogenital Diseases and Pregnancy Complications	Neoplastic Process
CXCL10	3627	Childhood Astrocytoma	C4086152	disease	Neoplasms	Neoplastic Process
CXCL10	3627	Severe Fever with Thrombocytopenia Syndrome	C4284413	disease	Hemic and Lymphatic Diseases	Disease or Syndrome
CXCL10	3627	Autoimmune hepatitis	C4721555	disease	Digestive System Diseases	Disease or Syndrome
MMP13	4322	Malignant tumor of colon	C0007102	disease	Digestive System Diseases; Neoplasms	Neoplastic Process
MMP13	4322	Renal Cell Carcinoma	C0007134	disease	Neoplasms; Female Urogenital Diseases and Pregnancy Complications; Male Urogenital Diseases	Neoplastic Process
MMP13	4322	Malignant tumor of cervix	C0007847	disease	Neoplasms; Female Urogenital Diseases and Pregnancy Complications	Neoplastic Process
MMP13	4322	Colitis	C0009319	disease	Digestive System Diseases	Disease or Syndrome
MMP13	4322	Coronary Arteriosclerosis	C0010054	disease	Cardiovascular Diseases	Disease or Syndrome
MMP13	4322	Coronary heart disease	C0010068	disease	Cardiovascular Diseases	Disease or Syndrome
MMP13	4322	Diabetes Mellitus, Insulin-Dependent	C0011854	disease	Nutritional and Metabolic Diseases; Immune System Diseases; Endocrine System Diseases	Disease or Syndrome
MMP13	4322	Diabetes Mellitus, Non-Insulin-Dependent	C0011860	disease	Nutritional and Metabolic Diseases; Endocrine System Diseases	Disease or Syndrome
MMP13	4322	Diverticulitis	C0012813	disease	Digestive System Diseases	Disease or Syndrome
MMP13	4322	Immunologic Deficiency Syndromes	C0021051	group	Immune System Diseases	Disease or Syndrome
MMP13	4322	Arthropathy	C0022408	group	Musculoskeletal Diseases	Disease or Syndrome
MMP13	4322	Keloid	C0022548	disease	Pathological Conditions, Signs and Symptoms; Skin and Connective Tissue Diseases	Acquired Abnormality
MMP13	4322	Mouth Neoplasms	C0026640	group	Neoplasms; Stomatognathic Diseases	Neoplastic Process
MMP13	4322	Multiple Myeloma	C0026764	disease	Neoplasms; Immune System Diseases; Hemic and Lymphatic Diseases; Cardiovascular Diseases	Neoplastic Process
MMP13	4322	Osteochondritis Dissecans	C0029421	disease	Musculoskeletal Diseases	Disease or Syndrome
MMP13	4322	Pneumonia	C0032285	disease	Infections; Respiratory Tract Diseases	Disease or Syndrome
MMP13	4322	Pulmonary Fibrosis	C0034069	disease	Respiratory Tract Diseases	Disease or Syndrome
MMP13	4322	Septicemia	C0036690	disease	Pathological Conditions, Signs and Symptoms; Infections	Disease or Syndrome
MMP13	4322	Synovitis	C0039103	disease	Musculoskeletal Diseases	Disease or Syndrome
MMP13	4322	Vitamin D Deficiency	C0042870	disease	Nutritional and Metabolic Diseases	Disease or Syndrome
MMP13	4322	Benign Neoplasm	C0086692	group	Neoplasms	Neoplastic Process
MMP13	4322	Disorder of tendon	C0151936	group	Skin and Connective Tissue Diseases; Musculoskeletal Diseases	Disease or Syndrome
MMP13	4322	Esophageal carcinoma	C0152018	disease	Digestive System Diseases; Neoplasms	Neoplastic Process
MMP13	4322	Malignant neoplasm of mouth	C0153381	group	Neoplasms; Stomatognathic Diseases	Neoplastic Process
MMP13	4322	Secondary malignant neoplasm of bone	C0153690	disease	Pathological Conditions, Signs and Symptoms; Neoplasms; Musculoskeletal Diseases	Neoplastic Process
MMP13	4322	Lip and Oral Cavity Carcinoma	C0220641	disease	Neoplasms; Stomatognathic Diseases	Neoplastic Process
MMP13	4322	Sepsis	C0243026	disease	Pathological Conditions, Signs and Symptoms; Infections	Disease or Syndrome
MMP13	4322	Cervix carcinoma	C0302592	disease	Neoplasms; Female Urogenital Diseases and Pregnancy Complications	Neoplastic Process
MMP13	4322	Superficial ulcer	C0333307	disease	Pathological Conditions, Signs and Symptoms	Acquired Abnormality
MMP13	4322	Caries (morphologic abnormality)	C0333519	disease	Pathological Conditions, Signs and Symptoms	Disease or Syndrome
MMP13	4322	Non-alcoholic Fatty Liver Disease	C0400966	disease	Digestive System Diseases	Disease or Syndrome
MMP13	4322	Neuropathy	C0442874	group	Nervous System Diseases	Disease or Syndrome
MMP13	4322	Secondary malignant neoplasm of liver	C0494165	disease	Digestive System Diseases; Neoplasms	Neoplastic Process
MMP13	4322	Malignant neoplasm of esophagus	C0546837	disease	Digestive System Diseases; Neoplasms	Neoplastic Process
MMP13	4322	Squamous cell carcinoma of skin	C0553723	disease	Neoplasms; Skin and Connective Tissue Diseases	Neoplastic Process
MMP13	4322	Colon Carcinoma	C0699790	disease	Digestive System Diseases; Neoplasms	Neoplastic Process
MMP13	4322	Malignant Peripheral Nerve Sheath Tumor	C0751690	disease	Neoplasms; Nervous System Diseases	Neoplastic Process
MMP13	4322	Liver regeneration disorder	C1318485	phenotype	Digestive System Diseases	Disease or Syndrome
MMP13	4322	Tendinopathy	C1568272	disease	Musculoskeletal Diseases; Wounds and Injuries	Disease or Syndrome
MMP13	4322	Cirrhosis	C1623038	disease	Pathological Conditions, Signs and Symptoms	Disease or Syndrome
MMP13	4322	Coronary Artery Disease	C1956346	disease	Cardiovascular Diseases	Disease or Syndrome
MMP13	4322	Experimental Organism Basal Cell Carcinoma	C3811653	phenotype	Neoplasms	Neoplastic Process
MMP13	4322	Skin Erosion	C3887524	disease	Skin and Connective Tissue Diseases	Disease or Syndrome
MMP13	4322	cervical cancer	C4048328	disease	Neoplasms; Female Urogenital Diseases and Pregnancy Complications	Neoplastic Process
MMP13	4322	Carcinoma, Ovarian Epithelial	C4721610	disease	Neoplasms; Female Urogenital Diseases and Pregnancy Complications; Endocrine System Diseases	Neoplastic Process
ROS1	6098	Congenital Abnormality	C0000768	group	Congenital, Hereditary, and Neonatal Diseases and Abnormalities	Congenital Abnormality
ROS1	6098	Asthma	C0004096	disease	Respiratory Tract Diseases; Immune System Diseases	Disease or Syndrome
ROS1	6098	Atrial Fibrillation	C0004238	disease	Pathological Conditions, Signs and Symptoms; Cardiovascular Diseases	Disease or Syndrome
ROS1	6098	Malignant neoplasm of urinary bladder	C0005684	disease	Neoplasms; Female Urogenital Diseases and Pregnancy Complications; Male Urogenital Diseases	Neoplastic Process
ROS1	6098	Bladder Neoplasm	C0005695	disease	Neoplasms; Female Urogenital Diseases and Pregnancy Complications; Male Urogenital Diseases	Neoplastic Process
ROS1	6098	Malignant tumor of cervix	C0007847	disease	Neoplasms; Female Urogenital Diseases and Pregnancy Complications	Neoplastic Process
ROS1	6098	Coronary heart disease	C0010068	disease	Cardiovascular Diseases	Disease or Syndrome
ROS1	6098	Diabetic Retinopathy	C0011884	disease	Eye Diseases; Endocrine System Diseases; Cardiovascular Diseases	Disease or Syndrome
ROS1	6098	Chronic granulomatous disease	C0018203	group	Congenital, Hereditary, and Neonatal Diseases and Abnormalities; Immune System Diseases; Hemic and Lymphatic Diseases	Disease or Syndrome
ROS1	6098	Hypercholesterolemia	C0020443	disease	Nutritional and Metabolic Diseases	Disease or Syndrome
ROS1	6098	Chronic Lymphocytic Leukemia	C0023434	disease	Neoplasms; Immune System Diseases; Hemic and Lymphatic Diseases	Neoplastic Process
ROS1	6098	Myeloid Leukemia, Chronic	C0023473	disease	Neoplasms; Hemic and Lymphatic Diseases	Neoplastic Process
ROS1	6098	Metabolic Diseases	C0025517	group	Nutritional and Metabolic Diseases	Disease or Syndrome
ROS1	6098	Systemic Scleroderma	C0036421	disease	Skin and Connective Tissue Diseases	Disease or Syndrome
ROS1	6098	B-Cell Lymphomas	C0079731	group	Neoplasms; Immune System Diseases; Hemic and Lymphatic Diseases	Neoplastic Process
ROS1	6098	Pleural Effusion, Malignant	C0080032	disease	Neoplasms; Respiratory Tract Diseases	Disease or Syndrome
ROS1	6098	Gestational Diabetes	C0085207	phenotype	Nutritional and Metabolic Diseases; Female Urogenital Diseases and Pregnancy Complications; Endocrine System Diseases	Disease or Syndrome
ROS1	6098	Squamous cell carcinoma of lung	C0149782	disease	Neoplasms; Respiratory Tract Diseases	Neoplastic Process
ROS1	6098	Lung Diseases, Interstitial	C0206062	group	Respiratory Tract Diseases	Disease or Syndrome
ROS1	6098	Adenosquamous carcinoma	C0206623	disease	Neoplasms	Neoplastic Process
ROS1	6098	Congenital contractural arachnodactyly	C0220668	disease	Congenital, Hereditary, and Neonatal Diseases and Abnormalities; Musculoskeletal Diseases	Congenital Abnormality
ROS1	6098	Pancreatic carcinoma	C0235974	disease	Digestive System Diseases; Neoplasms; Endocrine System Diseases	Neoplastic Process
ROS1	6098	Fibrosis, Liver	C0239946	disease	Pathological Conditions, Signs and Symptoms; Digestive System Diseases	Disease or Syndrome
ROS1	6098	Malignant Head and Neck Neoplasm	C0278996	disease	Neoplasms	Neoplastic Process
ROS1	6098	Deformity	C0302142	group	Pathological Conditions, Signs and Symptoms; Congenital, Hereditary, and Neonatal Diseases and Abnormalities	Anatomical Abnormality
ROS1	6098	Cervix carcinoma	C0302592	disease	Neoplasms; Female Urogenital Diseases and Pregnancy Complications	Neoplastic Process
ROS1	6098	Intrahepatic Cholangiocarcinoma	C0345905	disease	Neoplasms	Neoplastic Process
ROS1	6098	Malignant neoplasm of pancreas	C0346647	disease	Digestive System Diseases; Neoplasms; Endocrine System Diseases	Neoplastic Process
ROS1	6098	Respiratory syncytial virus (RSV) infection in conditions classified elsewhere and of unspecified site	C0375023	disease		Disease or Syndrome
ROS1	6098	Neurodegenerative Disorders	C0524851	group	Nervous System Diseases	Disease or Syndrome
ROS1	6098	Epithelial ovarian cancer	C0677886	disease	Neoplasms; Female Urogenital Diseases and Pregnancy Complications; Endocrine System Diseases	Neoplastic Process
ROS1	6098	Refractory cancer	C0677936	phenotype	Neoplasms	Neoplastic Process
ROS1	6098	CNS metastases	C0686377	phenotype	Neoplasms; Nervous System Diseases	Neoplastic Process
ROS1	6098	Secondary malignant neoplasm of lymph node	C0686619	disease	Pathological Conditions, Signs and Symptoms; Neoplasms	Neoplastic Process
ROS1	6098	Carcinoma of bladder	C0699885	disease	Neoplasms; Female Urogenital Diseases and Pregnancy Complications; Male Urogenital Diseases	Neoplastic Process
ROS1	6098	Mitochondrial Diseases	C0751651	group	Nutritional and Metabolic Diseases	Disease or Syndrome
ROS1	6098	Adenocarcinoma of lung, stage IV	C0854988	disease		Neoplastic Process
ROS1	6098	Aloof	C0860659	disease		Mental or Behavioral Dysfunction
ROS1	6098	Cardiomyopathies	C0878544	group	Cardiovascular Diseases	Disease or Syndrome
ROS1	6098	ovarian neoplasm	C0919267	disease	Neoplasms; Female Urogenital Diseases and Pregnancy Complications; Endocrine System Diseases	Neoplastic Process
ROS1	6098	Malignant neoplasm of ovary	C1140680	disease	Neoplasms; Female Urogenital Diseases and Pregnancy Complications; Endocrine System Diseases	Neoplastic Process
ROS1	6098	Autism Spectrum Disorders	C1510586	disease	Mental Disorders	Mental or Behavioral Dysfunction
ROS1	6098	Idiopathic Pulmonary Fibrosis	C1800706	disease	Respiratory Tract Diseases	Disease or Syndrome
ROS1	6098	Granulomatous Disease, Chronic, X-Linked	C1844376	disease	Congenital, Hereditary, and Neonatal Diseases and Abnormalities; Immune System Diseases; Hemic and Lymphatic Diseases	Disease or Syndrome
ROS1	6098	Coronary Artery Disease	C1956346	disease	Cardiovascular Diseases	Disease or Syndrome
ROS1	6098	Nasopharyngeal carcinoma	C2931822	disease	Neoplasms; Stomatognathic Diseases; Otorhinolaryngologic Diseases	Neoplastic Process
ROS1	6098	Triple Negative Breast Neoplasms	C3539878	disease	Neoplasms; Skin and Connective Tissue Diseases	Neoplastic Process
ROS1	6098	Head and Neck Carcinoma	C3887461	disease	Neoplasms	Neoplastic Process
ROS1	6098	cervical cancer	C4048328	disease	Neoplasms; Female Urogenital Diseases and Pregnancy Complications	Neoplastic Process
ROS1	6098	Primary cholangiocarcinoma of intrahepatic biliary tract	C4284013	disease	Neoplasms	Neoplastic Process
ROS1	6098	Triple-Negative Breast Carcinoma	C4722518	disease	Neoplasms; Skin and Connective Tissue Diseases	Neoplastic Process
RP1	6101	Colorectal Carcinoma	C0009402	disease	Digestive System Diseases; Neoplasms	Neoplastic Process
RP1	6101	Photoreceptor degeneration	C1998028	disease	Eye Diseases	Disease or Syndrome
SCN7A	6332	Cholera	C0008354	disease	Infections	Disease or Syndrome
SCN7A	6332	Kidney Diseases	C0022658	group	Female Urogenital Diseases and Pregnancy Complications; Male Urogenital Diseases	Disease or Syndrome
SCN7A	6332	Liver Cirrhosis	C0023890	disease	Pathological Conditions, Signs and Symptoms; Digestive System Diseases	Disease or Syndrome
SCN7A	6332	Renal glomerular disease	C0268731	group	Pathological Conditions, Signs and Symptoms; Female Urogenital Diseases and Pregnancy Complications; Male Urogenital Diseases	Disease or Syndrome
SCN7A	6332	Renal Insufficiency	C1565489	disease	Female Urogenital Diseases and Pregnancy Complications; Male Urogenital Diseases	Disease or Syndrome
SCN7A	6332	Cirrhosis	C1623038	disease	Pathological Conditions, Signs and Symptoms	Disease or Syndrome
SCN7A	6332	Renal tubular injury	C4324374	disease		Disease or Syndrome
CALCRL	10203	Rheumatoid Arthritis	C0003873	disease	Skin and Connective Tissue Diseases; Musculoskeletal Diseases; Immune System Diseases	Disease or Syndrome
CALCRL	10203	Angle Closure Glaucoma	C0017605	disease	Eye Diseases	Disease or Syndrome
CALCRL	10203	Primary angle-closure glaucoma	C0017606	disease	Eye Diseases	Disease or Syndrome
SLC6A14	11254	Malignant Neoplasms	C0006826	group	Neoplasms	Neoplastic Process
SLC6A14	11254	Ulcerative Colitis	C0009324	disease	Digestive System Diseases	Disease or Syndrome
SLC6A14	11254	Lung diseases	C0024115	group	Respiratory Tract Diseases	Disease or Syndrome
SLC6A14	11254	Pancreatic carcinoma	C0235974	disease	Digestive System Diseases; Neoplasms; Endocrine System Diseases	Neoplastic Process
SLC6A14	11254	Primary malignant neoplasm	C1306459	group	Neoplasms	Neoplastic Process
SLC6A14	11254	Pancreatic Ductal Adenocarcinoma	C1335302	disease	Digestive System Diseases; Neoplasms; Endocrine System Diseases	Neoplastic Process
SLC6A14	11254	Meconium ileus	C2939175	disease	Digestive System Diseases	Disease or Syndrome
LRRK2	120892	Amyloidosis	C0002726	disease	Nutritional and Metabolic Diseases	Disease or Syndrome
LRRK2	120892	Malignant neoplasm of breast	C0006142	disease	Neoplasms; Skin and Connective Tissue Diseases	Neoplastic Process
LRRK2	120892	Cognition Disorders	C0009241	group	Mental Disorders	Mental or Behavioral Dysfunction
LRRK2	120892	Colitis	C0009319	disease	Digestive System Diseases	Disease or Syndrome
LRRK2	120892	Neoplasms	C0027651	group	Neoplasms	Neoplastic Process
LRRK2	120892	Tuberculosis	C0041296	disease	Infections	Disease or Syndrome
LRRK2	120892	Corticobasal degeneration	C0393570	disease	Nervous System Diseases	Disease or Syndrome
LRRK2	120892	Dystonia Disorders	C0393593	group	Nervous System Diseases	Disease or Syndrome
LRRK2	120892	Social disinhibition	C0424296	disease	Mental Disorders	Mental or Behavioral Dysfunction
LRRK2	120892	Thyroid carcinoma	C0549473	disease	Neoplasms; Endocrine System Diseases	Neoplastic Process
LRRK2	120892	Breast Carcinoma	C0678222	disease	Neoplasms; Skin and Connective Tissue Diseases	Neoplastic Process
LRRK2	120892	Lafora Disease	C0751783	disease	Congenital, Hereditary, and Neonatal Diseases and Abnormalities; Nervous System Diseases	Disease or Syndrome
LRRK2	120892	Inflammatory disorder	C1290884	group	Pathological Conditions, Signs and Symptoms	Disease or Syndrome
LRRK2	120892	Somnolence	C2830004	phenotype	Pathological Conditions, Signs and Symptoms	Mental or Behavioral Dysfunction
LRRK2	120892	Atypical Parkinsonism	C4302185	disease	Nervous System Diseases	Disease or Syndrome
ABCA13	154664	Renal Cell Carcinoma	C0007134	disease	Neoplasms; Female Urogenital Diseases and Pregnancy Complications; Male Urogenital Diseases	Neoplastic Process
ABCA13	154664	Autism Spectrum Disorders	C1510586	disease	Mental Disorders	Mental or Behavioral Dysfunction
AGTR2	186	Anxiety	C0003467	disease	Behavior and Behavior Mechanisms	Mental or Behavioral Dysfunction
AGTR2	186	Anxiety Disorders	C0003469	group	Mental Disorders	Mental or Behavioral Dysfunction
AGTR2	186	Aortic Valve Stenosis	C0003507	disease	Cardiovascular Diseases	Disease or Syndrome
AGTR2	186	Rheumatoid Arthritis	C0003873	disease	Skin and Connective Tissue Diseases; Musculoskeletal Diseases; Immune System Diseases	Disease or Syndrome
AGTR2	186	Ataxia Telangiectasia	C0004135	disease	Congenital, Hereditary, and Neonatal Diseases and Abnormalities; Nutritional and Metabolic Diseases; Immune System Diseases; Nervous System Diseases; Cardiovascular Diseases	Disease or Syndrome
AGTR2	186	Autistic Disorder	C0004352	disease	Mental Disorders	Mental or Behavioral Dysfunction
AGTR2	186	Malignant neoplasm of urinary bladder	C0005684	disease	Neoplasms; Female Urogenital Diseases and Pregnancy Complications; Male Urogenital Diseases	Neoplastic Process
AGTR2	186	Bladder Neoplasm	C0005695	disease	Neoplasms; Female Urogenital Diseases and Pregnancy Complications; Male Urogenital Diseases	Neoplastic Process
AGTR2	186	Breast Diseases	C0006145	group	Skin and Connective Tissue Diseases	Disease or Syndrome
AGTR2	186	Carcinoma	C0007097	group	Neoplasms	Neoplastic Process
AGTR2	186	Squamous cell carcinoma	C0007137	disease	Neoplasms	Neoplastic Process
AGTR2	186	Hypertrophic Cardiomyopathy	C0007194	disease	Cardiovascular Diseases	Disease or Syndrome
AGTR2	186	CNS disorder	C0007682	group	Nervous System Diseases	Disease or Syndrome
AGTR2	186	Cerebral Infarction	C0007785	disease	Pathological Conditions, Signs and Symptoms; Nervous System Diseases; Cardiovascular Diseases	Disease or Syndrome
AGTR2	186	Colitis	C0009319	disease	Digestive System Diseases	Disease or Syndrome
AGTR2	186	Coronary Arteriosclerosis	C0010054	disease	Cardiovascular Diseases	Disease or Syndrome
AGTR2	186	Cushing Syndrome	C0010481	disease	Endocrine System Diseases	Disease or Syndrome
AGTR2	186	Cytomegalovirus Infections	C0010823	group	Infections	Disease or Syndrome
AGTR2	186	Presenile dementia	C0011265	disease	Nervous System Diseases; Mental Disorders	Mental or Behavioral Dysfunction
AGTR2	186	Mental Depression	C0011570	disease	Behavior and Behavior Mechanisms	Mental or Behavioral Dysfunction
AGTR2	186	Depressive disorder	C0011581	disease	Mental Disorders	Mental or Behavioral Dysfunction
AGTR2	186	Epilepsy	C0014544	disease	Nervous System Diseases	Disease or Syndrome
AGTR2	186	Epilepsy, Temporal Lobe	C0014556	disease	Nervous System Diseases	Disease or Syndrome
AGTR2	186	Fever	C0015967	phenotype	Pathological Conditions, Signs and Symptoms	Sign or Symptom
AGTR2	186	Heart Diseases	C0018799	group	Cardiovascular Diseases	Disease or Syndrome
AGTR2	186	Hypercholesterolemia	C0020443	disease	Nutritional and Metabolic Diseases	Disease or Syndrome
AGTR2	186	Hyperthyroidism	C0020550	disease	Endocrine System Diseases	Disease or Syndrome
AGTR2	186	Profound Mental Retardation	C0020796	disease	Pathological Conditions, Signs and Symptoms; Nervous System Diseases; Mental Disorders; Behavior and Behavior Mechanisms	Mental or Behavioral Dysfunction
AGTR2	186	Ischemia	C0022116	phenotype	Pathological Conditions, Signs and Symptoms	Pathologic Function
AGTR2	186	Fibroid Tumor	C0023267	disease	Neoplasms	Neoplastic Process
AGTR2	186	leiomyosarcoma	C0023269	disease	Neoplasms	Neoplastic Process
AGTR2	186	Acute Promyelocytic Leukemia	C0023487	disease	Neoplasms	Neoplastic Process
AGTR2	186	Lung Neoplasms	C0024121	group	Neoplasms; Respiratory Tract Diseases	Neoplastic Process
AGTR2	186	Lupus Erythematosus, Systemic	C0024141	disease	Skin and Connective Tissue Diseases; Immune System Diseases	Disease or Syndrome
AGTR2	186	Meningioma	C0025286	disease	Neoplasms; Nervous System Diseases	Neoplastic Process
AGTR2	186	Neuromyelitis Optica	C0027873	disease	Eye Diseases; Immune System Diseases; Nervous System Diseases	Disease or Syndrome
AGTR2	186	Degenerative polyarthritis	C0029408	disease	Musculoskeletal Diseases	Disease or Syndrome
AGTR2	186	Postherpetic neuralgia	C0032768	disease	Pathological Conditions, Signs and Symptoms; Nervous System Diseases	Disease or Syndrome
AGTR2	186	Pre-Eclampsia	C0032914	phenotype	Female Urogenital Diseases and Pregnancy Complications	Pathologic Function
AGTR2	186	Respiratory Distress Syndrome, Adult	C0035222	disease	Respiratory Tract Diseases	Disease or Syndrome
AGTR2	186	Sarcoidosis	C0036202	disease	Hemic and Lymphatic Diseases	Disease or Syndrome
AGTR2	186	Seizures	C0036572	phenotype	Pathological Conditions, Signs and Symptoms; Nervous System Diseases	Sign or Symptom
AGTR2	186	Septicemia	C0036690	disease	Pathological Conditions, Signs and Symptoms; Infections	Disease or Syndrome
AGTR2	186	Synovitis	C0039103	disease	Musculoskeletal Diseases	Disease or Syndrome
AGTR2	186	Tremor	C0040822	phenotype	Pathological Conditions, Signs and Symptoms; Nervous System Diseases	Sign or Symptom
AGTR2	186	Uterine Fibroids	C0042133	group	Neoplasms	Neoplastic Process
AGTR2	186	Obstructive nephropathy	C0149939	disease	Pathological Conditions, Signs and Symptoms; Female Urogenital Diseases and Pregnancy Complications; Male Urogenital Diseases	Disease or Syndrome
AGTR2	186	Low Tension Glaucoma	C0152136	disease	Eye Diseases	Disease or Syndrome
AGTR2	186	Cicatrix, Hypertrophic	C0162810	disease	Pathological Conditions, Signs and Symptoms	Acquired Abnormality
AGTR2	186	Aortic Aneurysm, Abdominal	C0162871	disease	Cardiovascular Diseases	Disease or Syndrome
AGTR2	186	Hyperandrogenism	C0206081	disease	Congenital, Hereditary, and Neonatal Diseases and Abnormalities; Female Urogenital Diseases and Pregnancy Complications; Male Urogenital Diseases; Endocrine System Diseases	Disease or Syndrome
AGTR2	186	Adrenal Cortical Adenoma	C0206667	disease	Neoplasms; Endocrine System Diseases	Neoplastic Process
AGTR2	186	Congenital contractural arachnodactyly	C0220668	disease	Congenital, Hereditary, and Neonatal Diseases and Abnormalities; Musculoskeletal Diseases	Congenital Abnormality
AGTR2	186	Premature aging syndrome	C0231341	disease	Pathological Conditions, Signs and Symptoms	Disease or Syndrome
AGTR2	186	Pancreatic carcinoma	C0235974	disease	Digestive System Diseases; Neoplasms; Endocrine System Diseases	Neoplastic Process
AGTR2	186	Renal interstitial fibrosis	C0235989	disease	Female Urogenital Diseases and Pregnancy Complications; Skin and Connective Tissue Diseases; Male Urogenital Diseases	Disease or Syndrome
AGTR2	186	Fibrosis, Liver	C0239946	disease	Pathological Conditions, Signs and Symptoms; Digestive System Diseases	Disease or Syndrome
AGTR2	186	Sepsis	C0243026	disease	Pathological Conditions, Signs and Symptoms; Infections	Disease or Syndrome
AGTR2	186	Carcinoma, Lewis Lung	C0243038	disease	Neoplasms	Neoplastic Process; Experimental Model of Disease
AGTR2	186	Atresia	C0243066	disease		Congenital Abnormality
AGTR2	186	Unilateral agenesis of kidney	C0266294	disease	Pathological Conditions, Signs and Symptoms; Female Urogenital Diseases and Pregnancy Complications; Male Urogenital Diseases	Congenital Abnormality
AGTR2	186	Adult Leiomyosarcoma	C0278607	disease	Neoplasms	Neoplastic Process
AGTR2	186	Adult Meningioma	C0278877	disease	Neoplasms; Nervous System Diseases	Neoplastic Process
AGTR2	186	Childhood Leiomyosarcoma	C0279986	disease	Neoplasms	Neoplastic Process
AGTR2	186	Segmental glomerulosclerosis	C0333497	disease	Female Urogenital Diseases and Pregnancy Complications; Male Urogenital Diseases	Disease or Syndrome
AGTR2	186	Impaired cognition	C0338656	disease	Mental Disorders	Mental or Behavioral Dysfunction
AGTR2	186	Adrenal Cushing's syndrome	C0342443	disease	Endocrine System Diseases	Disease or Syndrome
AGTR2	186	Vascular calcification	C0342649	phenotype	Nutritional and Metabolic Diseases	Disease or Syndrome
AGTR2	186	Depressed mood	C0344315	phenotype	Behavior and Behavior Mechanisms	Mental or Behavioral Dysfunction
AGTR2	186	Malignant neoplasm of pancreas	C0346647	disease	Digestive System Diseases; Neoplasms; Endocrine System Diseases	Neoplastic Process
AGTR2	186	Pulmonary Cystic Fibrosis	C0392164	disease	Congenital, Hereditary, and Neonatal Diseases and Abnormalities; Digestive System Diseases; Respiratory Tract Diseases	Disease or Syndrome
AGTR2	186	Chronic rejection of renal transplant	C0403592	disease	Female Urogenital Diseases and Pregnancy Complications; Male Urogenital Diseases	Disease or Syndrome
AGTR2	186	Hyperactive behavior	C0424295	phenotype	Pathological Conditions, Signs and Symptoms; Nervous System Diseases	Mental or Behavioral Dysfunction
AGTR2	186	Dementia	C0497327	disease	Nervous System Diseases; Mental Disorders	Mental or Behavioral Dysfunction
AGTR2	186	Metabolic Syndrome X	C0524620	disease	Nutritional and Metabolic Diseases	Disease or Syndrome
AGTR2	186	Carotid Atherosclerosis	C0577631	disease	Nervous System Diseases; Cardiovascular Diseases	Disease or Syndrome
AGTR2	186	Intraocular pressure disorder	C0595921	disease	Eye Diseases	Disease or Syndrome
AGTR2	186	Carcinoma of bladder	C0699885	disease	Neoplasms; Female Urogenital Diseases and Pregnancy Complications; Male Urogenital Diseases	Neoplastic Process
AGTR2	186	MOHR-TRANEBJAERG SYNDROME	C0796074	disease	Pathological Conditions, Signs and Symptoms; Congenital, Hereditary, and Neonatal Diseases and Abnormalities; Eye Diseases; Nervous System Diseases; Mental Disorders; Otorhinolaryngologic Diseases; Behavior and Behavior Mechanisms	Disease or Syndrome
AGTR2	186	Pregnancy associated hypertension	C0852036	phenotype	Female Urogenital Diseases and Pregnancy Complications; Cardiovascular Diseases	Disease or Syndrome
AGTR2	186	Invasive carcinoma of breast	C0853879	disease	Neoplasms; Skin and Connective Tissue Diseases	Neoplastic Process
AGTR2	186	Aneurysm of ascending aorta	C0856747	phenotype	Respiratory Tract Diseases; Cardiovascular Diseases	Disease or Syndrome
AGTR2	186	Chronic graft-versus-host disease	C0867389	disease	Immune System Diseases	Disease or Syndrome
AGTR2	186	Pancreatic Ductal Adenocarcinoma	C1335302	disease	Digestive System Diseases; Neoplasms; Endocrine System Diseases	Neoplastic Process
AGTR2	186	Conn Syndrome	C1384514	disease	Endocrine System Diseases	Disease or Syndrome
AGTR2	186	Mammary Neoplasms	C1458155	group	Neoplasms; Skin and Connective Tissue Diseases	Neoplastic Process
AGTR2	186	Meningioma, benign, no ICD-O subtype	C1762616	disease	Neoplasms; Nervous System Diseases	Neoplastic Process
AGTR2	186	Idiopathic Pulmonary Fibrosis	C1800706	disease	Respiratory Tract Diseases	Disease or Syndrome
AGTR2	186	ANOPHTHALMIA AND PULMONARY HYPOPLASIA	C1832661	disease	Congenital, Hereditary, and Neonatal Diseases and Abnormalities; Eye Diseases; Respiratory Tract Diseases	Disease or Syndrome
AGTR2	186	Mesial temporal sclerosis	C2062593	disease		Disease or Syndrome
AGTR2	186	Liver carcinoma	C2239176	disease	Digestive System Diseases; Neoplasms	Neoplastic Process
AGTR2	186	Ureterovesical junction obstruction	C2609249	disease	Female Urogenital Diseases and Pregnancy Complications; Male Urogenital Diseases	Congenital Abnormality
AGTR2	186	Promyelocytic leukemia	C2745900	disease		Neoplastic Process
AGTR2	186	Mechanical Allodynia	C2936719	phenotype	Pathological Conditions, Signs and Symptoms; Nervous System Diseases	Sign or Symptom
AGTR2	186	Distributive shock	C2938913	phenotype	Pathological Conditions, Signs and Symptoms	Disease or Syndrome
AGTR2	186	Idiopathic pulmonary arterial hypertension	C3203102	disease	Respiratory Tract Diseases	Disease or Syndrome
AGTR2	186	Vascular cognitive impairment	C3805043	disease		Disease or Syndrome
AGTR2	186	Experimental Organism Basal Cell Carcinoma	C3811653	phenotype	Neoplasms	Neoplastic Process
AGTR2	186	Dupuytren's Disease	C4082974	disease	Neoplasms; Skin and Connective Tissue Diseases; Musculoskeletal Diseases	Disease or Syndrome
AGTR2	186	Hypertrophic obstructive cardiomyopathy	C4551472	disease	Cardiovascular Diseases	Disease or Syndrome
AGTR2	186	Adrenal Gland Pheochromocytoma	C4551683	disease	Neoplasms; Endocrine System Diseases	Neoplastic Process
AGTR2	186	Vesicoureteral Reflux 1	C4551858	disease	Female Urogenital Diseases and Pregnancy Complications; Male Urogenital Diseases	Disease or Syndrome
AGTR2	186	Familial vesicoureteral reflux	C4706552	disease		Congenital Abnormality
AGTR2	186	Carcinoma, Basal Cell	C4721806	disease	Neoplasms	Neoplastic Process
FMO2	2327	Prader-Willi Syndrome	C0032897	disease	Congenital, Hereditary, and Neonatal Diseases and Abnormalities; Nutritional and Metabolic Diseases; Nervous System Diseases	Disease or Syndrome
FMO2	2327	Tuberculosis	C0041296	disease	Infections	Disease or Syndrome
FMO2	2327	Invasive Lobular Breast Carcinoma	C0279565	disease	Neoplasms; Skin and Connective Tissue Diseases	Neoplastic Process
FMO2	2327	Trimethylaminuria	C0342739	disease	Congenital, Hereditary, and Neonatal Diseases and Abnormalities; Nutritional and Metabolic Diseases	Disease or Syndrome
FMO2	2327	Invasive Ductal Breast Carcinoma	C1134719	disease	Neoplasms; Skin and Connective Tissue Diseases	Neoplastic Process
CXCL10	3627	Congenital Abnormality	C0000768	group	Congenital, Hereditary, and Neonatal Diseases and Abnormalities	Congenital Abnormality
CXCL10	3627	Acute periodontitis	C0001342	disease	Stomatognathic Diseases	Disease or Syndrome
CXCL10	3627	Addison Disease	C0001403	disease	Immune System Diseases; Endocrine System Diseases	Disease or Syndrome
CXCL10	3627	Adenitis	C0001416	phenotype	Hemic and Lymphatic Diseases	Sign or Symptom
CXCL10	3627	Airway Obstruction	C0001883	group	Respiratory Tract Diseases	Disease or Syndrome
CXCL10	3627	Alcohol Use Disorder	C0001956	disease	Chemically-Induced Disorders; Mental Disorders	Mental or Behavioral Dysfunction
CXCL10	3627	Amyloidosis	C0002726	disease	Nutritional and Metabolic Diseases	Disease or Syndrome
CXCL10	3627	Amyotrophic Lateral Sclerosis	C0002736	disease	Nutritional and Metabolic Diseases; Nervous System Diseases	Disease or Syndrome
CXCL10	3627	Anemia	C0002871	disease	Hemic and Lymphatic Diseases	Disease or Syndrome
CXCL10	3627	Aortic Valve Insufficiency	C0003504	disease	Cardiovascular Diseases	Disease or Syndrome
CXCL10	3627	Appendicitis	C0003615	disease	Digestive System Diseases; Infections	Disease or Syndrome
CXCL10	3627	Arthritis, Infectious	C0003869	group	Infections; Musculoskeletal Diseases	Disease or Syndrome
CXCL10	3627	Arthritis, Psoriatic	C0003872	disease	Skin and Connective Tissue Diseases; Musculoskeletal Diseases	Disease or Syndrome
CXCL10	3627	Ascites	C0003962	phenotype	Pathological Conditions, Signs and Symptoms	Disease or Syndrome
CXCL10	3627	Bacteremia	C0004610	disease	Pathological Conditions, Signs and Symptoms; Infections	Disease or Syndrome
CXCL10	3627	Bacterial Infections	C0004623	group	Infections	Disease or Syndrome
CXCL10	3627	Barrett Esophagus	C0004763	disease	Digestive System Diseases; Neoplasms	Disease or Syndrome
CXCL10	3627	Biliary Atresia	C0005411	disease	Congenital, Hereditary, and Neonatal Diseases and Abnormalities; Digestive System Diseases	Congenital Abnormality
CXCL10	3627	Blood Coagulation Disorders	C0005779	group	Hemic and Lymphatic Diseases	Disease or Syndrome
CXCL10	3627	Cutaneous Candidiasis	C0006846	disease	Infections; Skin and Connective Tissue Diseases	Disease or Syndrome
CXCL10	3627	Capillaritis	C0006902	disease	Pathological Conditions, Signs and Symptoms; Hemic and Lymphatic Diseases; Cardiovascular Diseases	Disease or Syndrome
CXCL10	3627	Carcinoma	C0007097	group	Neoplasms	Neoplastic Process
CXCL10	3627	Malignant neoplasm of skin	C0007114	disease	Neoplasms; Skin and Connective Tissue Diseases	Neoplastic Process
CXCL10	3627	Malignant neoplasm of thyroid	C0007115	disease	Neoplasms; Endocrine System Diseases	Neoplastic Process
CXCL10	3627	Cardiovascular Diseases	C0007222	group	Cardiovascular Diseases	Disease or Syndrome
CXCL10	3627	CNS disorder	C0007682	group	Nervous System Diseases	Disease or Syndrome
CXCL10	3627	Cerebral Infarction	C0007785	disease	Pathological Conditions, Signs and Symptoms; Nervous System Diseases; Cardiovascular Diseases	Disease or Syndrome
CXCL10	3627	Malignant tumor of cervix	C0007847	disease	Neoplasms; Female Urogenital Diseases and Pregnancy Complications	Neoplastic Process
CXCL10	3627	Uterine Cervical Neoplasm	C0007873	disease	Neoplasms; Female Urogenital Diseases and Pregnancy Complications	Neoplastic Process
CXCL10	3627	Chagas Cardiomyopathy	C0007930	disease	Infections; Cardiovascular Diseases	Disease or Syndrome
CXCL10	3627	Chorea	C0008489	phenotype	Pathological Conditions, Signs and Symptoms; Nervous System Diseases	Disease or Syndrome
CXCL10	3627	Common Cold	C0009443	disease	Infections; Respiratory Tract Diseases	Disease or Syndrome
CXCL10	3627	Condylomata Acuminata	C0009663	disease	Infections; Skin and Connective Tissue Diseases	Disease or Syndrome
CXCL10	3627	Constitutional Symptom	C0009812	phenotype		Sign or Symptom
CXCL10	3627	Febrile Convulsions	C0009952	disease	Pathological Conditions, Signs and Symptoms; Nervous System Diseases	Disease or Syndrome
CXCL10	3627	Coronary Arteriosclerosis	C0010054	disease	Cardiovascular Diseases	Disease or Syndrome
CXCL10	3627	Coronary heart disease	C0010068	disease	Cardiovascular Diseases	Disease or Syndrome
CXCL10	3627	Craniosynostosis	C0010278	disease	Congenital, Hereditary, and Neonatal Diseases and Abnormalities; Musculoskeletal Diseases	Disease or Syndrome
CXCL10	3627	Crohn Disease	C0010346	disease	Digestive System Diseases	Disease or Syndrome
CXCL10	3627	Cystic Fibrosis	C0010674	disease	Congenital, Hereditary, and Neonatal Diseases and Abnormalities; Digestive System Diseases; Respiratory Tract Diseases	Disease or Syndrome
CXCL10	3627	Cystitis	C0010692	disease	Female Urogenital Diseases and Pregnancy Complications; Male Urogenital Diseases	Disease or Syndrome
CXCL10	3627	Delirium	C0011206	disease	Pathological Conditions, Signs and Symptoms; Nervous System Diseases; Mental Disorders; Behavior and Behavior Mechanisms	Mental or Behavioral Dysfunction
CXCL10	3627	Presenile dementia	C0011265	disease	Nervous System Diseases; Mental Disorders	Mental or Behavioral Dysfunction
CXCL10	3627	Demyelinating Diseases	C0011303	group	Nervous System Diseases	Disease or Syndrome
CXCL10	3627	Dental caries	C0011334	disease	Stomatognathic Diseases	Disease or Syndrome
CXCL10	3627	Dentinogenesis Imperfecta	C0011436	disease	Congenital, Hereditary, and Neonatal Diseases and Abnormalities; Stomatognathic Diseases	Congenital Abnormality
CXCL10	3627	Diabetic Nephropathy	C0011881	disease	Female Urogenital Diseases and Pregnancy Complications; Male Urogenital Diseases; Endocrine System Diseases	Disease or Syndrome
CXCL10	3627	Endometrial Neoplasms	C0014170	group	Neoplasms; Female Urogenital Diseases and Pregnancy Complications	Neoplastic Process
CXCL10	3627	Eosinophilia	C0014457	disease	Hemic and Lymphatic Diseases	Disease or Syndrome
CXCL10	3627	Exanthema	C0015230	phenotype	Skin and Connective Tissue Diseases	Sign or Symptom
CXCL10	3627	Disorder of eye	C0015397	group	Eye Diseases	Disease or Syndrome
CXCL10	3627	Eye Infection	C0015403	group	Infections; Eye Diseases	Disease or Syndrome
CXCL10	3627	Fatty Liver	C0015695	disease	Digestive System Diseases	Disease or Syndrome
CXCL10	3627	Fetal Alcohol Syndrome	C0015923	disease	Congenital, Hereditary, and Neonatal Diseases and Abnormalities; Female Urogenital Diseases and Pregnancy Complications; Chemically-Induced Disorders	Disease or Syndrome
CXCL10	3627	Fever	C0015967	phenotype	Pathological Conditions, Signs and Symptoms	Sign or Symptom
CXCL10	3627	Flushing	C0016382	phenotype	Pathological Conditions, Signs and Symptoms	Sign or Symptom
CXCL10	3627	Gall Bladder Diseases	C0016977	group	Digestive System Diseases	Disease or Syndrome
CXCL10	3627	Gastritis	C0017152	disease	Digestive System Diseases	Disease or Syndrome
CXCL10	3627	Gliosis	C0017639	phenotype	Pathological Conditions, Signs and Symptoms	Pathologic Function
CXCL10	3627	Glomerulitis (disorder)	C0017657	disease	Pathological Conditions, Signs and Symptoms; Female Urogenital Diseases and Pregnancy Complications; Male Urogenital Diseases	Disease or Syndrome
CXCL10	3627	Membranous glomerulonephritis	C0017665	disease	Female Urogenital Diseases and Pregnancy Complications; Male Urogenital Diseases; Immune System Diseases	Disease or Syndrome
CXCL10	3627	Glycogen storage disease type II	C0017921	disease	Congenital, Hereditary, and Neonatal Diseases and Abnormalities; Nutritional and Metabolic Diseases; Nervous System Diseases	Disease or Syndrome
CXCL10	3627	Granuloma	C0018188	phenotype	Pathological Conditions, Signs and Symptoms; Hemic and Lymphatic Diseases	Pathologic Function
CXCL10	3627	Guillain-Barre Syndrome	C0018378	disease	Immune System Diseases; Nervous System Diseases	Disease or Syndrome
CXCL10	3627	Hay fever	C0018621	disease	Respiratory Tract Diseases; Immune System Diseases; Otorhinolaryngologic Diseases	Disease or Syndrome
CXCL10	3627	Headache	C0018681	phenotype	Pathological Conditions, Signs and Symptoms	Sign or Symptom
CXCL10	3627	Heart Block	C0018794	disease	Pathological Conditions, Signs and Symptoms; Cardiovascular Diseases	Disease or Syndrome
CXCL10	3627	Hemangiosarcoma	C0018923	disease	Neoplasms	Neoplastic Process
CXCL10	3627	Severe Dengue	C0019100	disease	Infections	Disease or Syndrome
CXCL10	3627	Hepatitis, Chronic	C0019189	disease	Digestive System Diseases	Disease or Syndrome
CXCL10	3627	Hepatorenal Syndrome	C0019212	disease	Digestive System Diseases; Female Urogenital Diseases and Pregnancy Complications; Male Urogenital Diseases	Disease or Syndrome
CXCL10	3627	Herpes NOS	C0019340	disease	Infections	Disease or Syndrome
CXCL10	3627	Herpes Simplex Infections	C0019348	group	Infections; Skin and Connective Tissue Diseases	Disease or Syndrome
CXCL10	3627	Herpesviridae Infections	C0019372	group	Infections	Disease or Syndrome
CXCL10	3627	Hypersplenism	C0020532	disease	Hemic and Lymphatic Diseases	Disease or Syndrome
CXCL10	3627	Hypothyroidism	C0020676	disease	Endocrine System Diseases	Disease or Syndrome
CXCL10	3627	Immune System Diseases	C0021053	group	Immune System Diseases	Disease or Syndrome
CXCL10	3627	Intestinal Neoplasms	C0021841	group	Digestive System Diseases; Neoplasms	Neoplastic Process
CXCL10	3627	Infection by Leishmania braziliensis	C0023288	disease	Infections; Skin and Connective Tissue Diseases	Disease or Syndrome
CXCL10	3627	Leishmaniasis, Visceral	C0023290	disease	Infections	Disease or Syndrome
CXCL10	3627	Borderline leprosy	C0023346	disease	Infections	Disease or Syndrome
CXCL10	3627	Chronic Lymphocytic Leukemia	C0023434	disease	Neoplasms; Immune System Diseases; Hemic and Lymphatic Diseases	Neoplastic Process
CXCL10	3627	Acute lymphocytic leukemia	C0023449	disease	Neoplasms; Immune System Diseases; Hemic and Lymphatic Diseases	Neoplastic Process
CXCL10	3627	Myeloid Leukemia, Chronic	C0023473	disease	Neoplasms; Hemic and Lymphatic Diseases	Neoplastic Process
CXCL10	3627	Leukoencephalopathy, Progressive Multifocal	C0023524	disease	Infections; Nervous System Diseases	Disease or Syndrome
CXCL10	3627	Lichen Sclerosus et Atrophicus	C0023652	disease	Skin and Connective Tissue Diseases	Disease or Syndrome
CXCL10	3627	Liver neoplasms	C0023903	group	Digestive System Diseases; Neoplasms	Neoplastic Process
CXCL10	3627	Lymphadenitis	C0024205	disease	Hemic and Lymphatic Diseases	Disease or Syndrome
CXCL10	3627	Malaria	C0024530	disease	Infections	Disease or Syndrome
CXCL10	3627	Mansonelliasis	C0024759	disease	Infections	Disease or Syndrome
CXCL10	3627	Paroxysmal nocturnal hemoglobinuria	C0024790	disease	Hemic and Lymphatic Diseases	Disease or Syndrome
CXCL10	3627	Marijuana Abuse	C0024809	disease	Chemically-Induced Disorders; Mental Disorders	Mental or Behavioral Dysfunction
CXCL10	3627	Multiple Endocrine Neoplasia Type 1	C0025267	disease	Congenital, Hereditary, and Neonatal Diseases and Abnormalities; Neoplasms; Endocrine System Diseases	Neoplastic Process
CXCL10	3627	Meningococcal Infections	C0025303	group	Infections	Disease or Syndrome
CXCL10	3627	Mesothelioma	C0025500	disease	Neoplasms	Neoplastic Process
CXCL10	3627	Microcephaly	C0025958	disease	Congenital, Hereditary, and Neonatal Diseases and Abnormalities; Musculoskeletal Diseases; Nervous System Diseases	Congenital Abnormality
CXCL10	3627	Mumps	C0026780	disease	Infections; Stomatognathic Diseases	Disease or Syndrome
CXCL10	3627	Mycobacterium avium-intracellulare Infection	C0026916	disease	Infections	Disease or Syndrome
CXCL10	3627	Nephritis	C0027697	disease	Female Urogenital Diseases and Pregnancy Complications; Male Urogenital Diseases	Disease or Syndrome
CXCL10	3627	nervous system disorder	C0027765	group	Nervous System Diseases	Disease or Syndrome
CXCL10	3627	Neuroblastoma	C0027819	disease	Neoplasms	Neoplastic Process
CXCL10	3627	neurofibroma	C0027830	disease	Neoplasms; Nervous System Diseases	Neoplastic Process
CXCL10	3627	Neurofibromatosis 1	C0027831	disease	Congenital, Hereditary, and Neonatal Diseases and Abnormalities; Neoplasms; Nervous System Diseases	Neoplastic Process
CXCL10	3627	Neurosyphilis	C0027927	disease	Infections; Nervous System Diseases	Disease or Syndrome
CXCL10	3627	Osteosarcoma	C0029463	disease	Neoplasms	Neoplastic Process
CXCL10	3627	Papillon-Lefevre Disease	C0030360	disease	Congenital, Hereditary, and Neonatal Diseases and Abnormalities; Skin and Connective Tissue Diseases	Disease or Syndrome
CXCL10	3627	Tropical Spastic Paraparesis	C0030481	disease	Infections; Nervous System Diseases	Disease or Syndrome
CXCL10	3627	Bullous pemphigoid	C0030805	disease	Skin and Connective Tissue Diseases; Immune System Diseases	Disease or Syndrome
CXCL10	3627	Aggressive Periodontitis	C0031106	disease	Stomatognathic Diseases	Disease or Syndrome
CXCL10	3627	Pleural effusion disorder	C0032227	group	Respiratory Tract Diseases	Disease or Syndrome
CXCL10	3627	Pneumococcal Infections	C0032269	group	Infections	Disease or Syndrome
CXCL10	3627	Lobar Pneumonia	C0032300	disease	Infections; Respiratory Tract Diseases	Disease or Syndrome
CXCL10	3627	Polycystic Ovary Syndrome	C0032460	disease	Neoplasms; Female Urogenital Diseases and Pregnancy Complications; Endocrine System Diseases	Disease or Syndrome
CXCL10	3627	Pre-Eclampsia	C0032914	phenotype	Female Urogenital Diseases and Pregnancy Complications	Pathologic Function
CXCL10	3627	Prostatic Neoplasms	C0033578	group	Neoplasms; Male Urogenital Diseases	Neoplastic Process
CXCL10	3627	Pulpitis	C0034103	disease	Stomatognathic Diseases	Disease or Syndrome
CXCL10	3627	Henoch-Schoenlein Purpura	C0034152	disease	Pathological Conditions, Signs and Symptoms; Immune System Diseases; Hemic and Lymphatic Diseases; Cardiovascular Diseases	Disease or Syndrome
CXCL10	3627	Q Fever	C0034362	disease	Infections	Disease or Syndrome
CXCL10	3627	Rabies (disorder)	C0034494	disease	Infections	Disease or Syndrome
CXCL10	3627	Retinal Vein Occlusion	C0035328	disease	Eye Diseases; Cardiovascular Diseases	Disease or Syndrome
CXCL10	3627	Retroviridae Infections	C0035369	group	Infections	Disease or Syndrome
CXCL10	3627	Rheumatism	C0035435	disease	Skin and Connective Tissue Diseases; Musculoskeletal Diseases	Disease or Syndrome
CXCL10	3627	Rheumatic Fever	C0035436	disease	Infections; Musculoskeletal Diseases	Disease or Syndrome
CXCL10	3627	Sarcoidosis, Pulmonary	C0036205	disease	Respiratory Tract Diseases; Hemic and Lymphatic Diseases	Disease or Syndrome
CXCL10	3627	Kaposi Sarcoma	C0036220	disease	Neoplasms; Infections	Neoplastic Process
CXCL10	3627	Seizures	C0036572	phenotype	Pathological Conditions, Signs and Symptoms; Nervous System Diseases	Sign or Symptom
CXCL10	3627	Sexually Transmitted Diseases	C0036916	group	Female Urogenital Diseases and Pregnancy Complications; Infections; Male Urogenital Diseases	Disease or Syndrome
CXCL10	3627	Sezary Syndrome	C0036920	disease	Neoplasms; Immune System Diseases; Hemic and Lymphatic Diseases	Neoplastic Process
CXCL10	3627	Signs and Symptoms, Respiratory	C0037090	group	Pathological Conditions, Signs and Symptoms	Sign or Symptom
CXCL10	3627	Silicosis	C0037116	disease	Respiratory Tract Diseases; Occupational Diseases	Disease or Syndrome
CXCL10	3627	Skin lesion	C0037284	group	Skin and Connective Tissue Diseases	Disease or Syndrome
CXCL10	3627	Subarachnoid Hemorrhage	C0038525	disease	Pathological Conditions, Signs and Symptoms; Nervous System Diseases; Cardiovascular Diseases	Disease or Syndrome
CXCL10	3627	Synovitis	C0039103	disease	Musculoskeletal Diseases	Disease or Syndrome
CXCL10	3627	Syphilis	C0039128	disease	Female Urogenital Diseases and Pregnancy Complications; Infections; Male Urogenital Diseases	Disease or Syndrome
CXCL10	3627	Syphilis, Latent	C0039133	disease	Infections	Disease or Syndrome
CXCL10	3627	Takayasu Arteritis	C0039263	disease	Skin and Connective Tissue Diseases; Cardiovascular Diseases	Disease or Syndrome
CXCL10	3627	Giant Cell Arteritis	C0039483	disease	Skin and Connective Tissue Diseases; Immune System Diseases; Nervous System Diseases; Cardiovascular Diseases	Disease or Syndrome
CXCL10	3627	Thromboangiitis Obliterans	C0040021	disease	Cardiovascular Diseases	Disease or Syndrome
CXCL10	3627	Thrombocytopenia	C0040034	phenotype	Hemic and Lymphatic Diseases	Disease or Syndrome
CXCL10	3627	Thyroid Diseases	C0040128	group	Endocrine System Diseases	Disease or Syndrome
CXCL10	3627	African Trypanosomiasis	C0041228	disease	Infections	Disease or Syndrome
CXCL10	3627	Tuberculosis, Meningeal	C0041318	disease	Infections; Nervous System Diseases	Disease or Syndrome
CXCL10	3627	Pleural Tuberculosis	C0041326	disease	Infections; Respiratory Tract Diseases	Disease or Syndrome
CXCL10	3627	Urinary tract infection	C0042029	group	Female Urogenital Diseases and Pregnancy Complications; Infections; Male Urogenital Diseases	Disease or Syndrome
CXCL10	3627	Vascular Diseases	C0042373	group	Cardiovascular Diseases	Disease or Syndrome
CXCL10	3627	Viral hepatitis	C0042721	group	Digestive System Diseases; Infections	Disease or Syndrome
CXCL10	3627	Vitamin D Deficiency	C0042870	disease	Nutritional and Metabolic Diseases	Disease or Syndrome
CXCL10	3627	Wheezing	C0043144	phenotype	Pathological Conditions, Signs and Symptoms	Sign or Symptom
CXCL10	3627	Xanthomatosis	C0043325	disease	Nutritional and Metabolic Diseases	Disease or Syndrome
CXCL10	3627	Diffuse Large B-Cell Lymphoma	C0079744	disease	Neoplasms; Immune System Diseases; Hemic and Lymphatic Diseases	Neoplastic Process
CXCL10	3627	T-Cell Lymphoma	C0079772	disease	Neoplasms; Immune System Diseases; Hemic and Lymphatic Diseases	Neoplastic Process
CXCL10	3627	Gestational Diabetes	C0085207	phenotype	Nutritional and Metabolic Diseases; Female Urogenital Diseases and Pregnancy Complications; Endocrine System Diseases	Disease or Syndrome
CXCL10	3627	Antiphospholipid Syndrome	C0085278	disease	Immune System Diseases	Disease or Syndrome
CXCL10	3627	Polycystic Kidney, Autosomal Dominant	C0085413	disease	Congenital, Hereditary, and Neonatal Diseases and Abnormalities; Female Urogenital Diseases and Pregnancy Complications; Male Urogenital Diseases	Disease or Syndrome
CXCL10	3627	Meningitis, Cryptococcal	C0085436	disease	Infections; Nervous System Diseases	Disease or Syndrome
CXCL10	3627	Polymyositis	C0085655	disease	Musculoskeletal Diseases; Nervous System Diseases	Disease or Syndrome
CXCL10	3627	Acute appendicitis NOS (disorder)	C0085693	disease	Digestive System Diseases; Infections	Disease or Syndrome
CXCL10	3627	Polyglandular Type I Autoimmune Syndrome	C0085859	disease	Immune System Diseases; Endocrine System Diseases	Disease or Syndrome
CXCL10	3627	Depressive Symptoms	C0086132	phenotype	Behavior and Behavior Mechanisms	Sign or Symptom
CXCL10	3627	Lower respiratory tract infection	C0149725	group	Infections; Respiratory Tract Diseases	Disease or Syndrome
CXCL10	3627	Chronic pain	C0150055	phenotype	Pathological Conditions, Signs and Symptoms	Sign or Symptom
CXCL10	3627	Sensory neuropathy	C0151313	disease	Pathological Conditions, Signs and Symptoms; Nervous System Diseases	Disease or Syndrome
CXCL10	3627	Secondary Sjögren's syndrome	C0151450	disease	Eye Diseases; Skin and Connective Tissue Diseases; Musculoskeletal Diseases; Immune System Diseases; Stomatognathic Diseases	Disease or Syndrome
CXCL10	3627	Hypocholesterolemia	C0151718	disease	Nutritional and Metabolic Diseases	Disease or Syndrome
CXCL10	3627	Coronary Occlusion	C0151814	disease	Cardiovascular Diseases	Disease or Syndrome
CXCL10	3627	Pleocytosis	C0151857	disease	Pathological Conditions, Signs and Symptoms; Hemic and Lymphatic Diseases	Disease or Syndrome
CXCL10	3627	Adenocarcinoma of lung (disorder)	C0152013	disease	Neoplasms	Neoplastic Process
CXCL10	3627	Nodular Sclerosis Classical Hodgkin Lymphoma	C0152268	disease	Neoplasms; Immune System Diseases; Hemic and Lymphatic Diseases	Neoplastic Process
CXCL10	3627	Non-arthropod borne lymphocytic choriomeningitis	C0153014	disease	Infections; Nervous System Diseases	Disease or Syndrome
CXCL10	3627	Secondary malignant neoplasm of lung	C0153676	disease	Neoplasms; Respiratory Tract Diseases	Neoplastic Process
CXCL10	3627	Secondary malignant neoplasm of bone	C0153690	disease	Pathological Conditions, Signs and Symptoms; Neoplasms; Musculoskeletal Diseases	Neoplastic Process
CXCL10	3627	Stage 0 Breast Carcinoma	C0154084	disease	Neoplasms; Skin and Connective Tissue Diseases	Neoplastic Process
CXCL10	3627	Acute angle-closure glaucoma	C0154946	disease	Pathological Conditions, Signs and Symptoms; Eye Diseases; Nervous System Diseases	Disease or Syndrome
CXCL10	3627	Streptococcal pneumonia	C0155862	disease	Infections; Respiratory Tract Diseases	Disease or Syndrome
CXCL10	3627	Cicatrix, Hypertrophic	C0162810	disease	Pathological Conditions, Signs and Symptoms	Acquired Abnormality
CXCL10	3627	Autoimmune thyroid disease	C0178468	disease	Immune System Diseases; Endocrine System Diseases	Disease or Syndrome
CXCL10	3627	Scab	C0205204	disease		Acquired Abnormality
CXCL10	3627	Carcinomatosis	C0205699	phenotype	Neoplasms	Neoplastic Process
CXCL10	3627	CREST Syndrome	C0206138	disease	Digestive System Diseases; Nutritional and Metabolic Diseases; Skin and Connective Tissue Diseases; Cardiovascular Diseases	Disease or Syndrome
CXCL10	3627	Adrenocortical carcinoma	C0206686	disease	Neoplasms; Endocrine System Diseases	Neoplastic Process
CXCL10	3627	Malignant ascites	C0220656	disease	Pathological Conditions, Signs and Symptoms; Digestive System Diseases; Neoplasms	Neoplastic Process
CXCL10	3627	Cartilage-hair hypoplasia	C0220748	disease	Congenital, Hereditary, and Neonatal Diseases and Abnormalities; Digestive System Diseases; Musculoskeletal Diseases; Immune System Diseases	Disease or Syndrome; Congenital Abnormality
CXCL10	3627	Congenital hypoplasia of adrenal gland	C0220766	disease	Congenital, Hereditary, and Neonatal Diseases and Abnormalities; Endocrine System Diseases	Congenital Abnormality
CXCL10	3627	Mesangial proliferative glomerulonephritis	C0221238	disease	Female Urogenital Diseases and Pregnancy Complications; Male Urogenital Diseases	Disease or Syndrome
CXCL10	3627	Inflammatory pain	C0234251	phenotype	Pathological Conditions, Signs and Symptoms	Sign or Symptom
CXCL10	3627	Mental deterioration	C0234985	phenotype	Mental Disorders	Mental or Behavioral Dysfunction
CXCL10	3627	Peripheral motor neuropathy	C0235025	disease	Nervous System Diseases	Disease or Syndrome
CXCL10	3627	Intravascular hemolysis	C0235574	disease	Pathological Conditions, Signs and Symptoms	Disease or Syndrome
CXCL10	3627	Proliferative glomerulonephritis	C0235618	disease	Female Urogenital Diseases and Pregnancy Complications; Male Urogenital Diseases	Disease or Syndrome
CXCL10	3627	Invasive aspergillosis	C0238013	disease	Infections	Disease or Syndrome
CXCL10	3627	Cytomegalovirus encephalitis	C0238097	disease	Infections; Nervous System Diseases	Disease or Syndrome
CXCL10	3627	Anaplastic thyroid carcinoma	C0238461	disease	Neoplasms	Neoplastic Process
CXCL10	3627	Parasitemia	C0242723	disease	Pathological Conditions, Signs and Symptoms; Infections	Disease or Syndrome
CXCL10	3627	Psoriasis vulgaris	C0263361	disease	Skin and Connective Tissue Diseases	Disease or Syndrome
CXCL10	3627	Dermatomyositis, Childhood Type	C0263666	disease	Skin and Connective Tissue Diseases; Musculoskeletal Diseases; Nervous System Diseases	Disease or Syndrome
CXCL10	3627	Lymphoid interstitial pneumonia	C0264511	disease	Respiratory Tract Diseases	Disease or Syndrome
CXCL10	3627	Thickening of pleura	C0264545	disease	Respiratory Tract Diseases	Disease or Syndrome
CXCL10	3627	Congenital emphysema	C0265797	disease	Respiratory Tract Diseases	Congenital Abnormality
CXCL10	3627	Lysinuric Protein Intolerance	C0268647	disease	Congenital, Hereditary, and Neonatal Diseases and Abnormalities; Nutritional and Metabolic Diseases	Disease or Syndrome
CXCL10	3627	Peripheral demyelinating neuropathy	C0270922	disease	Immune System Diseases; Nervous System Diseases	Disease or Syndrome
CXCL10	3627	Inflammatory neuropathy	C0270933	disease	Nervous System Diseases	Disease or Syndrome
CXCL10	3627	Addison's disease due to autoimmunity	C0271737	disease	Immune System Diseases; Endocrine System Diseases	Disease or Syndrome
CXCL10	3627	Acquired aplastic anemia	C0271907	disease	Hemic and Lymphatic Diseases	Disease or Syndrome
CXCL10	3627	Primary bacterial peritonitis	C0275551	disease	Digestive System Diseases; Infections	Disease or Syndrome
CXCL10	3627	Acute type A viral hepatitis	C0276434	disease	Digestive System Diseases; Infections	Disease or Syndrome
CXCL10	3627	Chronic viral hepatitis	C0276623	disease	Digestive System Diseases	Disease or Syndrome
CXCL10	3627	Metastatic melanoma	C0278883	disease	Neoplasms	Neoplastic Process
CXCL10	3627	Squamous cell carcinoma of esophagus	C0279626	disease	Digestive System Diseases; Neoplasms	Neoplastic Process
CXCL10	3627	Solid Neoplasm	C0280100	phenotype	Neoplasms	Neoplastic Process
CXCL10	3627	Diffuse Astrocytoma	C0280785	disease	Neoplasms	Neoplastic Process
CXCL10	3627	Iron Overload	C0282193	disease	Nutritional and Metabolic Diseases	Disease or Syndrome
CXCL10	3627	Leukostasis	C0282548	disease	Hemic and Lymphatic Diseases	Disease or Syndrome
CXCL10	3627	Cervix carcinoma	C0302592	disease	Neoplasms; Female Urogenital Diseases and Pregnancy Complications	Neoplastic Process
CXCL10	3627	Fulminant hepatitis	C0302809	disease	Digestive System Diseases	Disease or Syndrome
CXCL10	3627	Anastomosis	C0332853	disease		Acquired Abnormality
CXCL10	3627	Superficial ulcer	C0333307	disease	Pathological Conditions, Signs and Symptoms	Acquired Abnormality
CXCL10	3627	Tumor necrosis	C0333516	phenotype	Pathological Conditions, Signs and Symptoms	Neoplastic Process
CXCL10	3627	Caries (morphologic abnormality)	C0333519	disease	Pathological Conditions, Signs and Symptoms	Disease or Syndrome
CXCL10	3627	Lymphoid hyperplasia	C0333997	disease	Pathological Conditions, Signs and Symptoms; Hemic and Lymphatic Diseases	Disease or Syndrome
CXCL10	3627	Acute respiratory infections	C0339901	group	Infections; Respiratory Tract Diseases	Disease or Syndrome
CXCL10	3627	Acute exacerbation of chronic obstructive airways disease	C0340044	phenotype	Respiratory Tract Diseases	Disease or Syndrome
CXCL10	3627	Stable angina	C0340288	disease	Pathological Conditions, Signs and Symptoms; Cardiovascular Diseases	Disease or Syndrome
CXCL10	3627	Multinodular goiter	C0342208	disease	Neoplasms; Endocrine System Diseases	Disease or Syndrome
CXCL10	3627	Complications of Diabetes Mellitus	C0342257	group	Endocrine System Diseases	Disease or Syndrome
CXCL10	3627	X-linked Adrenal Hypoplasia	C0342482	disease	Endocrine System Diseases	Disease or Syndrome
CXCL10	3627	Capillary Leak Syndrome	C0343084	disease	Cardiovascular Diseases	Disease or Syndrome
CXCL10	3627	Helicobacter-associated gastritis	C0343378	disease	Digestive System Diseases; Infections	Disease or Syndrome
CXCL10	3627	Clostridium difficile infection	C0343386	disease	Infections	Disease or Syndrome
CXCL10	3627	Human papilloma virus infection	C0343641	disease	Infections	Disease or Syndrome
CXCL10	3627	Acute HIV infection	C0343752	disease	Infections; Immune System Diseases	Disease or Syndrome
CXCL10	3627	Malignant mesothelioma	C0345967	disease	Neoplasms; Respiratory Tract Diseases	Neoplastic Process
CXCL10	3627	Breast Cancer, Familial	C0346153	disease	Neoplasms; Skin and Connective Tissue Diseases	Neoplastic Process
CXCL10	3627	Asthma attack	C0347950	disease	Respiratory Tract Diseases; Immune System Diseases	Disease or Syndrome
CXCL10	3627	Squamous cell carcinoma of tongue	C0349566	disease	Neoplasms; Stomatognathic Diseases	Neoplastic Process
CXCL10	3627	Hematologic Neoplasms	C0376545	group	Neoplasms; Hemic and Lymphatic Diseases	Neoplastic Process
CXCL10	3627	Endotoxemia	C0376618	phenotype	Pathological Conditions, Signs and Symptoms; Infections	Disease or Syndrome
CXCL10	3627	Sepsis-Associated Encephalopathy	C0393642	disease	Nervous System Diseases	Disease or Syndrome
CXCL10	3627	Polyradiculoneuropathy, Chronic Inflammatory Demyelinating	C0393819	disease	Immune System Diseases; Nervous System Diseases	Disease or Syndrome
CXCL10	3627	Multifocal motor neuropathy	C0393847	disease	Immune System Diseases; Nervous System Diseases	Disease or Syndrome
CXCL10	3627	Histiocytic Necrotizing Lymphadenitis	C0398367	disease	Hemic and Lymphatic Diseases	Disease or Syndrome
CXCL10	3627	Muscle damage	C0410158	phenotype		Acquired Abnormality
CXCL10	3627	Osteoglophonic dwarfism	C0432283	disease	Congenital, Hereditary, and Neonatal Diseases and Abnormalities; Musculoskeletal Diseases	Congenital Abnormality
CXCL10	3627	Neuropathy	C0442874	group	Nervous System Diseases	Disease or Syndrome
CXCL10	3627	Halo nevus	C0474824	disease	Neoplasms	Neoplastic Process
CXCL10	3627	Neonatal hyperglycemia	C0475718	disease	Nutritional and Metabolic Diseases	Disease or Syndrome
CXCL10	3627	Secondary malignant neoplasm of liver	C0494165	disease	Digestive System Diseases; Neoplasms	Neoplastic Process
CXCL10	3627	Dementia	C0497327	disease	Nervous System Diseases; Mental Disorders	Mental or Behavioral Dysfunction
CXCL10	3627	Auricular swelling	C0549297	phenotype	Female Urogenital Diseases and Pregnancy Complications; Male Urogenital Diseases	Sign or Symptom
CXCL10	3627	Acute asthma	C0582415	disease	Respiratory Tract Diseases; Immune System Diseases	Disease or Syndrome
CXCL10	3627	Osteosarcoma of bone	C0585442	disease	Neoplasms	Neoplastic Process
CXCL10	3627	Tuberculosis, extrapulmonary	C0679362	disease	Infections	Disease or Syndrome
CXCL10	3627	Central Diabetes Insipidus	C0687720	disease	Female Urogenital Diseases and Pregnancy Complications; Male Urogenital Diseases; Endocrine System Diseases	Disease or Syndrome
CXCL10	3627	Colon Carcinoma	C0699790	disease	Digestive System Diseases; Neoplasms	Neoplastic Process
CXCL10	3627	airway disease	C0699949	disease	Pathological Conditions, Signs and Symptoms; Respiratory Tract Diseases	Disease or Syndrome
CXCL10	3627	Central neuroblastoma	C0700095	disease	Neoplasms; Nervous System Diseases	Neoplastic Process
CXCL10	3627	Middle Cerebral Artery Occlusion	C0740391	disease	Pathological Conditions, Signs and Symptoms; Nervous System Diseases; Cardiovascular Diseases	Acquired Abnormality
CXCL10	3627	allergic symptom	C0740903	phenotype		Sign or Symptom
CXCL10	3627	cyst benign	C0742960	disease		Disease or Syndrome
CXCL10	3627	eyes dry chronic	C0743746	disease		Disease or Syndrome
CXCL10	3627	Acute respiratory distress	C0748355	disease	Pathological Conditions, Signs and Symptoms; Respiratory Tract Diseases	Disease or Syndrome
CXCL10	3627	Granulomatous uveitis	C0750046	disease	Eye Diseases	Disease or Syndrome
CXCL10	3627	Idiopathic Inflammatory Myopathies	C0751356	disease	Musculoskeletal Diseases; Nervous System Diseases	Disease or Syndrome
CXCL10	3627	Inclusion Body Myopathy, Sporadic	C0751713	disease	Musculoskeletal Diseases; Nervous System Diseases	Disease or Syndrome
CXCL10	3627	Multiple Sclerosis, Primary Progressive	C0751964	disease	Immune System Diseases; Nervous System Diseases	Disease or Syndrome
CXCL10	3627	Multiple Sclerosis, Relapsing-Remitting	C0751967	disease	Immune System Diseases; Nervous System Diseases	Disease or Syndrome
CXCL10	3627	Malignant Pleural Mesothelioma	C0812413	disease	Neoplasms; Respiratory Tract Diseases	Neoplastic Process
CXCL10	3627	Arteriopathic disease	C0852949	group	Pathological Conditions, Signs and Symptoms; Cardiovascular Diseases	Disease or Syndrome
CXCL10	3627	Diabetic Cardiomyopathies	C0853897	disease	Endocrine System Diseases; Cardiovascular Diseases	Disease or Syndrome
CXCL10	3627	Acute GVH disease	C0856825	disease	Immune System Diseases	Disease or Syndrome
CXCL10	3627	Breast adenocarcinoma	C0858252	disease	Neoplasms; Skin and Connective Tissue Diseases	Neoplastic Process
CXCL10	3627	Leishmania infantum disease	C0860027	disease		Disease or Syndrome
CXCL10	3627	Cholestatic liver disease	C0860204	disease	Digestive System Diseases	Disease or Syndrome
CXCL10	3627	Disseminated leishmaniasis	C0860236	disease		Disease or Syndrome
CXCL10	3627	Cytomegalovirus viremia	C0877635	disease	Pathological Conditions, Signs and Symptoms; Infections	Disease or Syndrome
CXCL10	3627	Cardiomyopathies	C0878544	group	Cardiovascular Diseases	Disease or Syndrome
CXCL10	3627	Overactive Bladder	C0878773	disease	Pathological Conditions, Signs and Symptoms; Female Urogenital Diseases and Pregnancy Complications; Male Urogenital Diseases	Disease or Syndrome
CXCL10	3627	ovarian neoplasm	C0919267	disease	Neoplasms; Female Urogenital Diseases and Pregnancy Complications; Endocrine System Diseases	Neoplastic Process
CXCL10	3627	Vascular inflammations	C0947751	phenotype	Cardiovascular Diseases	Disease or Syndrome
CXCL10	3627	Myasthenias	C0947912	disease	Pathological Conditions, Signs and Symptoms; Musculoskeletal Diseases; Nervous System Diseases	Disease or Syndrome
CXCL10	3627	Alloimmunisation	C0948201	disease		Disease or Syndrome
CXCL10	3627	Neuroborreliosis	C0948264	disease	Infections	Disease or Syndrome
CXCL10	3627	Euthymia	C0948853	disease		Mental or Behavioral Dysfunction
CXCL10	3627	Spondylarthritis	C0949690	disease	Musculoskeletal Diseases	Disease or Syndrome
CXCL10	3627	Malignant neoplasm of ovary	C1140680	disease	Neoplasms; Female Urogenital Diseases and Pregnancy Complications; Endocrine System Diseases	Neoplastic Process
CXCL10	3627	Lower respiratory tract inflammation	C1167659	disease		Disease or Syndrome
CXCL10	3627	Diffuse Scleroderma	C1258104	disease	Skin and Connective Tissue Diseases	Disease or Syndrome
CXCL10	3627	Sarcoma	C1261473	group	Neoplasms	Neoplastic Process
CXCL10	3627	Glial scar	C1262048	phenotype		Acquired Abnormality
CXCL10	3627	Invasive Fungal Infections	C1262313	group	Infections	Disease or Syndrome
CXCL10	3627	Segmental vitiligo	C1274648	disease	Skin and Connective Tissue Diseases	Disease or Syndrome
CXCL10	3627	Familial Multiple Lipomatosis	C1275273	disease	Congenital, Hereditary, and Neonatal Diseases and Abnormalities; Nutritional and Metabolic Diseases; Skin and Connective Tissue Diseases	Disease or Syndrome
CXCL10	3627	Inflammatory disorder	C1290884	group	Pathological Conditions, Signs and Symptoms	Disease or Syndrome
CXCL10	3627	Precursor B-cell lymphoblastic leukemia	C1292769	disease	Neoplasms; Immune System Diseases; Hemic and Lymphatic Diseases	Neoplastic Process
CXCL10	3627	Chronic myeloproliferative disorder	C1292778	disease	Neoplasms; Hemic and Lymphatic Diseases	Neoplastic Process
CXCL10	3627	Eosinophilic disorder	C1306759	group	Hemic and Lymphatic Diseases	Disease or Syndrome
CXCL10	3627	Stromal keratitis	C1318020	disease	Eye Diseases	Disease or Syndrome
CXCL10	3627	Mucocutaneous leishmaniasis	C1328252	disease	Infections; Skin and Connective Tissue Diseases	Disease or Syndrome
CXCL10	3627	Adult Diffuse Astrocytoma	C1332200	disease	Neoplasms	Neoplastic Process
CXCL10	3627	Adult Diffuse Large B-Cell Lymphoma	C1332201	disease	Neoplasms; Immune System Diseases; Hemic and Lymphatic Diseases	Neoplastic Process
CXCL10	3627	Adult Lymphoma	C1332206	disease	Neoplasms; Immune System Diseases; Hemic and Lymphatic Diseases	Neoplastic Process
CXCL10	3627	Childhood Lymphoma	C1332979	disease	Neoplasms; Immune System Diseases; Hemic and Lymphatic Diseases	Neoplastic Process
CXCL10	3627	Childhood Osteosarcoma	C1332986	disease	Neoplasms	Neoplastic Process
CXCL10	3627	Intestinal Graft Versus Host Disease	C1334228	disease	Immune System Diseases	Disease or Syndrome
CXCL10	3627	Pancreatic Ductal Adenocarcinoma	C1335302	disease	Digestive System Diseases; Neoplasms; Endocrine System Diseases	Neoplastic Process
CXCL10	3627	Systemic onset juvenile chronic arthritis	C1384600	disease	Skin and Connective Tissue Diseases; Musculoskeletal Diseases; Immune System Diseases	Disease or Syndrome
CXCL10	3627	BB leprosy	C1389289	disease		Disease or Syndrome
CXCL10	3627	Cancer cachexia	C1391732	disease		Neoplastic Process
CXCL10	3627	Mycobacterium leprae infection	C1411934	disease		Disease or Syndrome
CXCL10	3627	Ocular syphilis	C1444605	disease	Female Urogenital Diseases and Pregnancy Complications; Infections; Eye Diseases; Male Urogenital Diseases	Disease or Syndrome
CXCL10	3627	Bacteroides fragilis infection in conditions classified elsewhere and of unspecified site	C1456246	disease		Disease or Syndrome
CXCL10	3627	Leukemia, Large Granular Lymphocytic	C1522378	disease	Neoplasms; Immune System Diseases; Hemic and Lymphatic Diseases	Neoplastic Process
CXCL10	3627	Pneumocystis jiroveci pneumonia	C1535939	disease	Infections; Respiratory Tract Diseases	Disease or Syndrome
CXCL10	3627	Leprosy, Multibacillary	C1562585	disease	Infections	Disease or Syndrome
CXCL10	3627	Leprosy, Paucibacillary	C1562908	disease	Infections	Disease or Syndrome
CXCL10	3627	Immune Reconstitution Inflammatory Syndrome	C1619738	disease	Immune System Diseases	Disease or Syndrome
CXCL10	3627	Arthritis, Bacterial	C1692886	group	Infections; Musculoskeletal Diseases	Disease or Syndrome
CXCL10	3627	BK virus nephropathy	C1697878	disease	Infections	Disease or Syndrome
CXCL10	3627	HCV coinfection	C1698259	disease		Disease or Syndrome
CXCL10	3627	Laryngeal cleft	C1840311	disease	Congenital, Hereditary, and Neonatal Diseases and Abnormalities	Congenital Abnormality
CXCL10	3627	PIGMENTARY DISORDER, RETICULATE, WITH SYSTEMIC MANIFESTATIONS	C1845050	disease	Pathological Conditions, Signs and Symptoms; Congenital, Hereditary, and Neonatal Diseases and Abnormalities; Nutritional and Metabolic Diseases; Skin and Connective Tissue Diseases	Disease or Syndrome
CXCL10	3627	MYELOPROLIFERATIVE DISORDER, CHRONIC, WITH EOSINOPHILIA	C1851585	disease	Hemic and Lymphatic Diseases	Disease or Syndrome
CXCL10	3627	Trichohepatoenteric Syndrome	C1857276	disease	Pathological Conditions, Signs and Symptoms; Congenital, Hereditary, and Neonatal Diseases and Abnormalities; Female Urogenital Diseases and Pregnancy Complications; Skin and Connective Tissue Diseases	Disease or Syndrome
CXCL10	3627	Childhood Ataxia with Central Nervous System Hypomyelinization	C1858991	disease	Nervous System Diseases	Disease or Syndrome
CXCL10	3627	SVEINSSON CHORIORETINAL ATROPHY	C1862382	disease	Congenital, Hereditary, and Neonatal Diseases and Abnormalities; Eye Diseases	Disease or Syndrome
CXCL10	3627	Precursor Cell Lymphoblastic Leukemia Lymphoma	C1961102	disease	Neoplasms; Immune System Diseases; Hemic and Lymphatic Diseases	Neoplastic Process
CXCL10	3627	Autoimmune Primary Adrenal Insufficiency	C2103602	disease	Immune System Diseases; Endocrine System Diseases	Disease or Syndrome
CXCL10	3627	Exacerbation of idiopathic pulmonary fibrosis	C2242482	disease		Disease or Syndrome
CXCL10	3627	Chronic thromboembolic pulmonary hypertension	C2363973	disease	Respiratory Tract Diseases; Cardiovascular Diseases	Disease or Syndrome
CXCL10	3627	Fibrosis of pleura	C2720436	disease	Infections; Respiratory Tract Diseases	Disease or Syndrome
CXCL10	3627	Complicated malaria	C2747816	disease	Infections	Disease or Syndrome
CXCL10	3627	Somnolence	C2830004	phenotype	Pathological Conditions, Signs and Symptoms	Mental or Behavioral Dysfunction
CXCL10	3627	Bone Marrow failure syndromes	C2931245	disease		Disease or Syndrome
CXCL10	3627	Secondary Neoplasm	C2939419	group	Pathological Conditions, Signs and Symptoms; Neoplasms	Neoplastic Process
CXCL10	3627	Immune reconstitution inflammatory syndrome [IRIS]	C2976853	disease		Disease or Syndrome
CXCL10	3627	Infection - suppurative	C3249881	group	Pathological Conditions, Signs and Symptoms; Infections	Disease or Syndrome
CXCL10	3627	MYELODYSPLASTIC SYNDROME	C3463824	group	Hemic and Lymphatic Diseases	Neoplastic Process
CXCL10	3627	Somatotrophinoma, Familial	C3489630	disease	Neoplasms; Nervous System Diseases; Endocrine System Diseases	Neoplastic Process
CXCL10	3627	Fulminant type 1 diabetes mellitus	C3495814	disease		Disease or Syndrome
CXCL10	3627	Triple Negative Breast Neoplasms	C3539878	disease	Neoplasms; Skin and Connective Tissue Diseases	Neoplastic Process
CXCL10	3627	Allergic sensitization	C3662483	disease		Disease or Syndrome
CXCL10	3627	Neutrophilia (disorder)	C3665444	disease	Pathological Conditions, Signs and Symptoms; Hemic and Lymphatic Diseases	Disease or Syndrome
CXCL10	3627	Middle East Respiratory Syndrome	C3694279	disease	Infections	Disease or Syndrome
CXCL10	3627	Experimental Organism Basal Cell Carcinoma	C3811653	phenotype	Neoplasms	Neoplastic Process
CXCL10	3627	Tuberculosis in children	C3825570	disease		Disease or Syndrome
CXCL10	3627	Enterovirus 71 infection	C3853962	disease	Infections	Disease or Syndrome
CXCL10	3627	Inflammatory dermatosis	C3875321	disease	Skin and Connective Tissue Diseases	Disease or Syndrome
CXCL10	3627	Skin Erosion	C3887524	disease	Skin and Connective Tissue Diseases	Disease or Syndrome
CXCL10	3627	Nonnuclear polymorphic congenital cataract	C3888391	disease		Congenital Abnormality
CXCL10	3627	Post-Hemorrhagic Hydrocephalus	C3897877	disease	Nervous System Diseases	Disease or Syndrome
CXCL10	3627	Early Rheumatoid Arthritis	C3899278	disease	Skin and Connective Tissue Diseases; Musculoskeletal Diseases; Immune System Diseases	Disease or Syndrome
CXCL10	3627	Childhood Diffuse Astrocytoma	C3899668	disease	Neoplasms	Neoplastic Process
CXCL10	3627	Overactive bladder syndrome	C4020898	disease		Disease or Syndrome
CXCL10	3627	Nongranulomatous uveitis	C4024795	disease	Eye Diseases	Disease or Syndrome
CXCL10	3627	Immunosuppression	C4048329	disease		Disease or Syndrome
CXCL10	3627	Systemic immune activation	C4049273	disease		Disease or Syndrome
CXCL10	3627	Chronic hepatitis C genotype 4	C4049431	disease		Disease or Syndrome
CXCL10	3627	Encephalitis caused by tick-borne encephalitis virus	C4076533	disease	Infections; Nervous System Diseases	Disease or Syndrome
CXCL10	3627	Childhood Neuroblastoma	C4086165	disease	Neoplasms	Neoplastic Process
CXCL10	3627	Non-ST Elevated Myocardial Infarction	C4255010	disease	Pathological Conditions, Signs and Symptoms; Cardiovascular Diseases	Disease or Syndrome
CXCL10	3627	HIV-associated neurocognitive disorder	C4285693	disease	Infections; Immune System Diseases	Disease or Syndrome
CXCL10	3627	Immune-mediated hepatitis	C4324396	disease		Disease or Syndrome
CXCL10	3627	HIV Coinfection	C4505456	disease	Infections; Immune System Diseases	Disease or Syndrome
CXCL10	3627	Stage 0 Breast Cancer AJCC v6 and v7	C4520821	disease	Neoplasms; Skin and Connective Tissue Diseases	Neoplastic Process
CXCL10	3627	Congenital atresia of extrahepatic bile duct	C4520983	disease	Congenital, Hereditary, and Neonatal Diseases and Abnormalities; Digestive System Diseases	Congenital Abnormality
CXCL10	3627	Adrenal Gland Pheochromocytoma	C4551683	disease	Neoplasms; Endocrine System Diseases	Neoplastic Process
CXCL10	3627	Malignant neoplasm of soft tissue	C4551686	group	Neoplasms	Neoplastic Process
CXCL10	3627	Sarcoma of soft tissue	C4551687	group	Neoplasms	Neoplastic Process
CXCL10	3627	Carcinoma, Ovarian Epithelial	C4721610	disease	Neoplasms; Female Urogenital Diseases and Pregnancy Complications; Endocrine System Diseases	Neoplastic Process
CXCL10	3627	Carcinoma, Basal Cell	C4721806	disease	Neoplasms	Neoplastic Process
CXCL10	3627	Triple-Negative Breast Carcinoma	C4722518	disease	Neoplasms; Skin and Connective Tissue Diseases	Neoplastic Process
MMP13	4322	Congenital Abnormality	C0000768	group	Congenital, Hereditary, and Neonatal Diseases and Abnormalities	Congenital Abnormality
MMP13	4322	Agenesis	C0000846	disease		Congenital Abnormality
MMP13	4322	Primary Myelofibrosis	C0001815	disease	Hemic and Lymphatic Diseases	Neoplastic Process
MMP13	4322	Alveolar Bone Loss	C0002382	disease	Musculoskeletal Diseases; Stomatognathic Diseases	Disease or Syndrome
MMP13	4322	Alzheimer's Disease	C0002395	disease	Nervous System Diseases; Mental Disorders	Disease or Syndrome
MMP13	4322	Aortic Valve Insufficiency	C0003504	disease	Cardiovascular Diseases	Disease or Syndrome
MMP13	4322	Aortic Valve Stenosis	C0003507	disease	Cardiovascular Diseases	Disease or Syndrome
MMP13	4322	Asthma	C0004096	disease	Respiratory Tract Diseases; Immune System Diseases	Disease or Syndrome
MMP13	4322	Barrett Esophagus	C0004763	disease	Digestive System Diseases; Neoplasms	Disease or Syndrome
MMP13	4322	Bone Cysts	C0005937	disease	Neoplasms; Musculoskeletal Diseases	Anatomical Abnormality
MMP13	4322	Bone Diseases	C0005940	group	Musculoskeletal Diseases	Disease or Syndrome
MMP13	4322	Bowen's Disease	C0006079	disease	Neoplasms	Neoplastic Process
MMP13	4322	Noninfiltrating Intraductal Carcinoma	C0007124	disease	Neoplasms	Neoplastic Process
MMP13	4322	Mucinous Adenocarcinoma	C0007130	disease	Neoplasms	Neoplastic Process
MMP13	4322	Non-Small Cell Lung Carcinoma	C0007131	disease	Neoplasms; Respiratory Tract Diseases	Neoplastic Process
MMP13	4322	Carcinoma, Transitional Cell	C0007138	disease	Neoplasms	Neoplastic Process
MMP13	4322	Cardiovascular Diseases	C0007222	group	Cardiovascular Diseases	Disease or Syndrome
MMP13	4322	Ulcerative Colitis	C0009324	disease	Digestive System Diseases	Disease or Syndrome
MMP13	4322	Colonic Neoplasms	C0009375	group	Digestive System Diseases; Neoplasms	Neoplastic Process
MMP13	4322	Cyst	C0010709	disease	Pathological Conditions, Signs and Symptoms; Neoplasms	Disease or Syndrome
MMP13	4322	Endometrial Neoplasms	C0014170	group	Neoplasms; Female Urogenital Diseases and Pregnancy Complications	Neoplastic Process
MMP13	4322	Endometriosis	C0014175	disease	Female Urogenital Diseases and Pregnancy Complications	Disease or Syndrome
MMP13	4322	Esophageal Neoplasms	C0014859	group	Digestive System Diseases; Neoplasms	Neoplastic Process
MMP13	4322	Fibrosarcoma	C0016057	disease	Neoplasms	Neoplastic Process
MMP13	4322	Gingivitis	C0017574	disease	Infections; Stomatognathic Diseases	Disease or Syndrome
MMP13	4322	Glioblastoma	C0017636	disease	Neoplasms	Neoplastic Process
MMP13	4322	Glioma	C0017638	disease	Neoplasms	Neoplastic Process
MMP13	4322	Hepatitis	C0019158	group	Digestive System Diseases	Disease or Syndrome
MMP13	4322	Intervertebral Disk Displacement	C0021818	disease	Pathological Conditions, Signs and Symptoms; Musculoskeletal Diseases	Disease or Syndrome
MMP13	4322	keratoacanthoma	C0022572	disease	Skin and Connective Tissue Diseases	Neoplastic Process
MMP13	4322	Laryngeal Diseases	C0023051	group	Respiratory Tract Diseases; Otorhinolaryngologic Diseases	Disease or Syndrome
MMP13	4322	Leukoplakia	C0023531	disease	Pathological Conditions, Signs and Symptoms; Neoplasms	Neoplastic Process
MMP13	4322	Liver diseases	C0023895	group	Digestive System Diseases	Disease or Syndrome
MMP13	4322	Lung Neoplasms	C0024121	group	Neoplasms; Respiratory Tract Diseases	Neoplastic Process
MMP13	4322	Lyme Disease	C0024198	disease	Infections	Disease or Syndrome
MMP13	4322	Marfan Syndrome	C0024796	disease	Congenital, Hereditary, and Neonatal Diseases and Abnormalities; Skin and Connective Tissue Diseases; Musculoskeletal Diseases; Cardiovascular Diseases	Disease or Syndrome
MMP13	4322	Dental Fluorosis, Acquired	C0026618	disease	Stomatognathic Diseases	Disease or Syndrome
MMP13	4322	Mucocutaneous Lymph Node Syndrome	C0026691	disease	Skin and Connective Tissue Diseases; Hemic and Lymphatic Diseases; Cardiovascular Diseases	Disease or Syndrome
MMP13	4322	neurofibroma	C0027830	disease	Neoplasms; Nervous System Diseases	Neoplastic Process
MMP13	4322	Neurofibromatosis 1	C0027831	disease	Congenital, Hereditary, and Neonatal Diseases and Abnormalities; Neoplasms; Nervous System Diseases	Neoplastic Process
MMP13	4322	Osteomyelitis	C0029443	disease	Infections; Musculoskeletal Diseases	Disease or Syndrome
MMP13	4322	Osteopenia	C0029453	disease	Nutritional and Metabolic Diseases; Musculoskeletal Diseases	Disease or Syndrome
MMP13	4322	Periapical Granuloma	C0031029	disease	Stomatognathic Diseases	Disease or Syndrome
MMP13	4322	Periodontal Diseases	C0031090	group	Stomatognathic Diseases	Disease or Syndrome
MMP13	4322	Plasmacytoma	C0032131	disease	Neoplasms; Immune System Diseases	Neoplastic Process
MMP13	4322	Radicular Cyst	C0034543	disease	Neoplasms; Musculoskeletal Diseases; Stomatognathic Diseases	Disease or Syndrome
MMP13	4322	Kaposi Sarcoma	C0036220	disease	Neoplasms; Infections	Neoplastic Process
MMP13	4322	Status Epilepticus	C0038220	disease	Pathological Conditions, Signs and Symptoms; Nervous System Diseases	Disease or Syndrome
MMP13	4322	Thyroid Neoplasm	C0040136	disease	Neoplasms; Endocrine System Diseases	Neoplastic Process
MMP13	4322	Tuberculosis	C0041296	disease	Infections	Disease or Syndrome
MMP13	4322	Tuberculosis, Spinal	C0041330	disease	Infections; Musculoskeletal Diseases	Disease or Syndrome
MMP13	4322	Varicose Ulcer	C0042344	disease	Skin and Connective Tissue Diseases; Cardiovascular Diseases	Disease or Syndrome
MMP13	4322	Varicosity	C0042345	disease	Cardiovascular Diseases	Disease or Syndrome
MMP13	4322	Vascular Diseases	C0042373	group	Cardiovascular Diseases	Disease or Syndrome
MMP13	4322	Epidermolysis Bullosa Acquisita	C0079293	disease	Congenital, Hereditary, and Neonatal Diseases and Abnormalities; Skin and Connective Tissue Diseases	Disease or Syndrome
MMP13	4322	Hallopeau-Siemens Disease	C0079474	disease	Congenital, Hereditary, and Neonatal Diseases and Abnormalities; Skin and Connective Tissue Diseases	Disease or Syndrome
MMP13	4322	Corneal Neovascularization	C0085109	disease	Pathological Conditions, Signs and Symptoms; Eye Diseases	Disease or Syndrome
MMP13	4322	Severe Combined Immunodeficiency	C0085110	disease	Congenital, Hereditary, and Neonatal Diseases and Abnormalities; Nutritional and Metabolic Diseases; Immune System Diseases	Disease or Syndrome
MMP13	4322	Pancreatitis, Chronic	C0149521	disease	Digestive System Diseases	Disease or Syndrome
MMP13	4322	Renal fibrosis	C0151650	disease	Pathological Conditions, Signs and Symptoms; Female Urogenital Diseases and Pregnancy Complications; Male Urogenital Diseases	Disease or Syndrome
MMP13	4322	Adenocarcinoma of lung (disorder)	C0152013	disease	Neoplasms	Neoplastic Process
MMP13	4322	Mooren's ulcer	C0155072	disease	Infections; Eye Diseases	Disease or Syndrome
MMP13	4322	Cleft palate with cleft lip	C0158646	disease	Congenital, Hereditary, and Neonatal Diseases and Abnormalities; Musculoskeletal Diseases; Stomatognathic Diseases	Congenital Abnormality
MMP13	4322	Neurofibromatoses	C0162678	group	Congenital, Hereditary, and Neonatal Diseases and Abnormalities; Neoplasms; Nervous System Diseases	Neoplastic Process
MMP13	4322	Cicatrix, Hypertrophic	C0162810	disease	Pathological Conditions, Signs and Symptoms	Acquired Abnormality
MMP13	4322	Glomerulosclerosis (disorder)	C0178664	disease	Female Urogenital Diseases and Pregnancy Complications; Male Urogenital Diseases; Cardiovascular Diseases	Disease or Syndrome
MMP13	4322	Microinvasive tumor	C0205622	disease		Neoplastic Process
MMP13	4322	Dysplastic Nevus	C0205748	disease	Congenital, Hereditary, and Neonatal Diseases and Abnormalities; Neoplasms	Neoplastic Process
MMP13	4322	Giant Cell Tumor of Bone	C0206638	disease	Neoplasms	Neoplastic Process
MMP13	4322	Fibroadenoma	C0206650	disease	Neoplasms	Neoplastic Process
MMP13	4322	Adenomatous Polyps	C0206677	disease	Neoplasms	Neoplastic Process
MMP13	4322	Carcinoma, Signet Ring Cell	C0206696	disease	Neoplasms	Neoplastic Process
MMP13	4322	Nerve Sheath Tumors	C0206727	group	Neoplasms; Nervous System Diseases	Neoplastic Process
MMP13	4322	Lumbar disc disease	C0221775	disease	Pathological Conditions, Signs and Symptoms; Musculoskeletal Diseases	Disease or Syndrome
MMP13	4322	Joint function disorder	C0231586	disease		Disease or Syndrome
MMP13	4322	Fibrillation	C0232197	disease	Pathological Conditions, Signs and Symptoms; Cardiovascular Diseases	Disease or Syndrome
MMP13	4322	Mental deterioration	C0234985	phenotype	Mental Disorders	Mental or Behavioral Dysfunction
MMP13	4322	Pancreatic carcinoma	C0235974	disease	Digestive System Diseases; Neoplasms; Endocrine System Diseases	Neoplastic Process
MMP13	4322	Anaplastic thyroid carcinoma	C0238461	disease	Neoplasms	Neoplastic Process
MMP13	4322	Papillary thyroid carcinoma	C0238463	disease	Neoplasms; Endocrine System Diseases	Neoplastic Process
MMP13	4322	bone destruction	C0238790	disease		Disease or Syndrome
MMP13	4322	Disk, Herniated	C0242362	disease	Pathological Conditions, Signs and Symptoms; Musculoskeletal Diseases	Acquired Abnormality
MMP13	4322	Age related macular degeneration	C0242383	disease	Eye Diseases	Disease or Syndrome
MMP13	4322	Hypertrophic disorder of skin, unspecified	C0263630	group	Skin and Connective Tissue Diseases	Disease or Syndrome
MMP13	4322	Degeneration of lumbar intervertebral disc	C0263874	disease	Musculoskeletal Diseases	Disease or Syndrome
MMP13	4322	Metaphyseal chondrodysplasia Schmid type	C0265289	disease	Congenital, Hereditary, and Neonatal Diseases and Abnormalities; Musculoskeletal Diseases	Disease or Syndrome
MMP13	4322	Idiopathic parathyroidism	C0271862	disease	Endocrine System Diseases	Disease or Syndrome
MMP13	4322	Carcinoma breast stage IV	C0278488	disease		Neoplastic Process
MMP13	4322	Adult Fibrosarcoma	C0278595	disease	Neoplasms	Neoplastic Process
MMP13	4322	Transitional cell carcinoma of bladder	C0279680	disease	Neoplasms; Female Urogenital Diseases and Pregnancy Complications; Male Urogenital Diseases	Neoplastic Process
MMP13	4322	Conventional (Clear Cell) Renal Cell Carcinoma	C0279702	disease	Neoplasms; Female Urogenital Diseases and Pregnancy Complications; Male Urogenital Diseases	Neoplastic Process
MMP13	4322	Solid Neoplasm	C0280100	phenotype	Neoplasms	Neoplastic Process
MMP13	4322	Squamous cell carcinoma of oropharynx	C0280313	disease	Neoplasms; Stomatognathic Diseases; Otorhinolaryngologic Diseases	Neoplastic Process
MMP13	4322	Laryngeal Squamous Cell Carcinoma	C0280324	disease	Neoplasms; Respiratory Tract Diseases; Otorhinolaryngologic Diseases	Neoplastic Process
MMP13	4322	Chronic ulcer	C0333297	disease	Pathological Conditions, Signs and Symptoms; Digestive System Diseases; Skin and Connective Tissue Diseases	Disease or Syndrome
MMP13	4322	Nodular melanoma	C0334424	disease	Neoplasms; Skin and Connective Tissue Diseases	Neoplastic Process
MMP13	4322	Impaired cognition	C0338656	disease	Mental Disorders	Mental or Behavioral Dysfunction
MMP13	4322	Jaw Keratocyst	C0341038	disease	Neoplasms; Musculoskeletal Diseases; Stomatognathic Diseases	Disease or Syndrome
MMP13	4322	Large cell carcinoma of lung	C0345958	disease	Neoplasms; Respiratory Tract Diseases	Neoplastic Process
MMP13	4322	Malignant neoplasm of pancreas	C0346647	disease	Digestive System Diseases; Neoplasms; Endocrine System Diseases	Neoplastic Process
MMP13	4322	Lhermitte-Duclos disease	C0391826	disease	Congenital, Hereditary, and Neonatal Diseases and Abnormalities; Neoplasms	Neoplastic Process
MMP13	4322	Idiopathic osteoarthritis	C0409952	disease	Musculoskeletal Diseases	Disease or Syndrome
MMP13	4322	Chronic active hepatitis	C0520463	disease	Digestive System Diseases	Disease or Syndrome
MMP13	4322	Oropharyngeal disorders	C0553694	group	Digestive System Diseases; Respiratory Tract Diseases; Stomatognathic Diseases; Otorhinolaryngologic Diseases	Disease or Syndrome
MMP13	4322	Tongue Carcinoma	C0558353	disease	Neoplasms; Stomatognathic Diseases	Neoplastic Process
MMP13	4322	Allergy to peanuts	C0559470	phenotype	Immune System Diseases	Disease or Syndrome
MMP13	4322	Hyperhomocysteinemia	C0598608	disease	Congenital, Hereditary, and Neonatal Diseases and Abnormalities; Nutritional and Metabolic Diseases	Disease or Syndrome
MMP13	4322	Central Diabetes Insipidus	C0687720	disease	Female Urogenital Diseases and Pregnancy Complications; Male Urogenital Diseases; Endocrine System Diseases	Disease or Syndrome
MMP13	4322	Strudwick syndrome	C0700635	disease	Congenital, Hereditary, and Neonatal Diseases and Abnormalities; Musculoskeletal Diseases	Disease or Syndrome
MMP13	4322	Hypophosphatemic Rickets, X-Linked Dominant	C0733682	disease	Congenital, Hereditary, and Neonatal Diseases and Abnormalities; Nutritional and Metabolic Diseases; Female Urogenital Diseases and Pregnancy Complications; Musculoskeletal Diseases; Male Urogenital Diseases	Disease or Syndrome
MMP13	4322	early pregnancy	C0747845	phenotype		Disease or Syndrome
MMP13	4322	Malignant Squamous Cell Neoplasm	C0751688	disease	Neoplasms	Neoplastic Process
MMP13	4322	Smith-Magenis syndrome	C0795864	disease	Congenital, Hereditary, and Neonatal Diseases and Abnormalities; Nervous System Diseases	Disease or Syndrome
MMP13	4322	Infection caused by Helicobacter pylori	C0850666	disease	Infections	Disease or Syndrome
MMP13	4322	Pseudomonas aeruginosa infection	C0854135	disease	Infections	Disease or Syndrome
MMP13	4322	Triple vessel disease	C0856738	disease	Cardiovascular Diseases	Disease or Syndrome
MMP13	4322	Influenza A virus infection	C0858004	disease	Infections; Respiratory Tract Diseases	Disease or Syndrome
MMP13	4322	Infectious Lung Disorder	C0876973	group	Infections; Respiratory Tract Diseases	Disease or Syndrome
MMP13	4322	Enzyme inhibition disorder	C0877008	phenotype		Disease or Syndrome
MMP13	4322	Cerebral Aneurysm	C0917996	disease	Nervous System Diseases; Cardiovascular Diseases	Disease or Syndrome
MMP13	4322	ovarian neoplasm	C0919267	disease	Neoplasms; Female Urogenital Diseases and Pregnancy Complications; Endocrine System Diseases	Neoplastic Process
MMP13	4322	Malignant neoplasm of ovary	C1140680	disease	Neoplasms; Female Urogenital Diseases and Pregnancy Complications; Endocrine System Diseases	Neoplastic Process
MMP13	4322	High-Grade Prostatic Intraepithelial Neoplasia	C1168327	disease	Neoplasms; Male Urogenital Diseases	Neoplastic Process
MMP13	4322	Morphologically altered structure	C1260954	disease		Anatomical Abnormality
MMP13	4322	Adenoma of large intestine	C1302401	disease	Digestive System Diseases; Neoplasms	Neoplastic Process
MMP13	4322	After-cataract	C1306068	disease	Eye Diseases	Disease or Syndrome
MMP13	4322	Perianal Squamous Intraepithelial Neoplasia	C1332271	disease		Neoplastic Process
MMP13	4322	Recurrent Malignant Peripheral Nerve Sheath Tumor	C1335710	disease	Neoplasms; Nervous System Diseases	Neoplastic Process
MMP13	4322	Renal carcinoma	C1378703	disease	Neoplasms; Female Urogenital Diseases and Pregnancy Complications; Male Urogenital Diseases	Neoplastic Process
MMP13	4322	Generalized osteoarthritis	C1384584	disease	Musculoskeletal Diseases	Disease or Syndrome
MMP13	4322	Cardiomyopathy, Familial Idiopathic	C1449563	disease	Cardiovascular Diseases	Disease or Syndrome
MMP13	4322	Malignant transformation	C1608408	phenotype		Neoplastic Process
MMP13	4322	Glioblastoma Multiforme	C1621958	disease	Neoplasms	Neoplastic Process
MMP13	4322	Enchondroma	C1704356	disease	Neoplasms	Neoplastic Process
MMP13	4322	Peripheral Arterial Diseases	C1704436	group	Cardiovascular Diseases	Disease or Syndrome
MMP13	4322	Generalized chronic periodontitis	C1719498	disease	Stomatognathic Diseases	Disease or Syndrome
MMP13	4322	Idiopathic Pulmonary Fibrosis	C1800706	disease	Respiratory Tract Diseases	Disease or Syndrome
MMP13	4322	TARSAL-CARPAL COALITION SYNDROME	C1861305	disease	Congenital, Hereditary, and Neonatal Diseases and Abnormalities; Musculoskeletal Diseases	Disease or Syndrome
MMP13	4322	Influenza A	C2062441	disease		Disease or Syndrome
MMP13	4322	Metaphyseal Anadysplasia 1	C2748495	disease	Congenital, Hereditary, and Neonatal Diseases and Abnormalities; Musculoskeletal Diseases	Disease or Syndrome
MMP13	4322	Post traumatic osteoarthritis	C2894027	disease		Disease or Syndrome
MMP13	4322	Vitamin D-Resistant Rickets, X-Linked	C3536984	disease	Congenital, Hereditary, and Neonatal Diseases and Abnormalities; Nutritional and Metabolic Diseases; Female Urogenital Diseases and Pregnancy Complications; Musculoskeletal Diseases; Male Urogenital Diseases	Disease or Syndrome
MMP13	4322	Triple Negative Breast Neoplasms	C3539878	disease	Neoplasms; Skin and Connective Tissue Diseases	Neoplastic Process
MMP13	4322	Dental fluorosis	C3665629	disease		Congenital Abnormality
MMP13	4322	Dental caries in children	C3826476	disease		Disease or Syndrome
MMP13	4322	Experimental Organism Benign Keratoacanthoma	C3899234	disease		Neoplastic Process
MMP13	4322	Congenital Dysplasia Of The Hip	C4551649	disease	Congenital, Hereditary, and Neonatal Diseases and Abnormalities; Musculoskeletal Diseases	Congenital Abnormality
MMP13	4322	Extrapulmonary Small Cell Carcinoma	C4722419	disease	Neoplasms	Neoplastic Process
MMP13	4322	Metastatic Malignant Neoplasm in the Viscera	C4725861	disease		Neoplastic Process
MMP13	4322	Metastatic Gastric Carcinoma	C4727169	disease		Neoplastic Process
MMP13	4322	Advanced Melanoma	C4727838	disease		Neoplastic Process
ROS1	6098	Abscess	C0000833	phenotype	Pathological Conditions, Signs and Symptoms; Infections	Disease or Syndrome
ROS1	6098	Acute pancreatitis	C0001339	disease	Digestive System Diseases	Disease or Syndrome
ROS1	6098	Amyotrophic Lateral Sclerosis	C0002736	disease	Nutritional and Metabolic Diseases; Nervous System Diseases	Disease or Syndrome
ROS1	6098	Anemia, Sickle Cell	C0002895	disease	Congenital, Hereditary, and Neonatal Diseases and Abnormalities; Hemic and Lymphatic Diseases	Disease or Syndrome
ROS1	6098	Anthrax disease	C0003175	disease	Infections	Disease or Syndrome
ROS1	6098	Aortic Valve Insufficiency	C0003504	disease	Cardiovascular Diseases	Disease or Syndrome
ROS1	6098	Arthritis, Psoriatic	C0003872	disease	Skin and Connective Tissue Diseases; Musculoskeletal Diseases	Disease or Syndrome
ROS1	6098	Astrocytoma	C0004114	disease	Neoplasms	Neoplastic Process
ROS1	6098	Blast Phase	C0005699	disease	Pathological Conditions, Signs and Symptoms; Neoplasms; Hemic and Lymphatic Diseases	Neoplastic Process
ROS1	6098	Brain Diseases	C0006111	group	Nervous System Diseases	Disease or Syndrome
ROS1	6098	Brain Neoplasms	C0006118	group	Neoplasms; Nervous System Diseases	Neoplastic Process
ROS1	6098	Bronchospasm	C0006266	disease	Respiratory Tract Diseases	Disease or Syndrome
ROS1	6098	Bronchitis	C0006277	disease	Infections; Respiratory Tract Diseases	Disease or Syndrome
ROS1	6098	Burkitt Lymphoma	C0006413	disease	Neoplasms; Infections; Immune System Diseases; Hemic and Lymphatic Diseases	Neoplastic Process
ROS1	6098	Adenocarcinoma of prostate	C0007112	disease	Neoplasms; Male Urogenital Diseases	Neoplastic Process
ROS1	6098	Malignant neoplasm of thyroid	C0007115	disease	Neoplasms; Endocrine System Diseases	Neoplastic Process
ROS1	6098	Carpal Tunnel Syndrome	C0007286	disease	Nervous System Diseases; Wounds and Injuries	Disease or Syndrome
ROS1	6098	CNS disorder	C0007682	group	Nervous System Diseases	Disease or Syndrome
ROS1	6098	Congenital chromosomal disease	C0008626	group	Congenital, Hereditary, and Neonatal Diseases and Abnormalities	Congenital Abnormality
ROS1	6098	Craniosynostosis	C0010278	disease	Congenital, Hereditary, and Neonatal Diseases and Abnormalities; Musculoskeletal Diseases	Disease or Syndrome
ROS1	6098	Mental Depression	C0011570	disease	Behavior and Behavior Mechanisms	Mental or Behavioral Dysfunction
ROS1	6098	Depressive disorder	C0011581	disease	Mental Disorders	Mental or Behavioral Dysfunction
ROS1	6098	Dermatitis, Atopic	C0011615	disease	Congenital, Hereditary, and Neonatal Diseases and Abnormalities; Skin and Connective Tissue Diseases; Immune System Diseases	Disease or Syndrome
ROS1	6098	Diabetes Mellitus, Insulin-Dependent	C0011854	disease	Nutritional and Metabolic Diseases; Immune System Diseases; Endocrine System Diseases	Disease or Syndrome
ROS1	6098	Diabetic Neuropathies	C0011882	group	Nervous System Diseases; Endocrine System Diseases	Disease or Syndrome
ROS1	6098	Dwarfism	C0013336	disease	Congenital, Hereditary, and Neonatal Diseases and Abnormalities; Musculoskeletal Diseases; Endocrine System Diseases	Congenital Abnormality
ROS1	6098	Eczema	C0013595	disease	Skin and Connective Tissue Diseases	Disease or Syndrome
ROS1	6098	Endocardial Cushion Defects	C0014116	group	Congenital, Hereditary, and Neonatal Diseases and Abnormalities; Cardiovascular Diseases	Congenital Abnormality
ROS1	6098	Endometriosis	C0014175	disease	Female Urogenital Diseases and Pregnancy Complications	Disease or Syndrome
ROS1	6098	Fatigue	C0015672	phenotype	Pathological Conditions, Signs and Symptoms	Sign or Symptom
ROS1	6098	Fatty Liver, Alcoholic	C0015696	disease	Digestive System Diseases; Chemically-Induced Disorders	Disease or Syndrome
ROS1	6098	Fibrosarcoma	C0016057	disease	Neoplasms	Neoplastic Process
ROS1	6098	Folic Acid Deficiency	C0016412	disease	Nutritional and Metabolic Diseases	Disease or Syndrome
ROS1	6098	Gerstmann-Straussler-Scheinker Disease	C0017495	disease	Congenital, Hereditary, and Neonatal Diseases and Abnormalities; Infections; Nervous System Diseases	Disease or Syndrome
ROS1	6098	Glaucoma	C0017601	disease	Eye Diseases	Disease or Syndrome
ROS1	6098	Cardiac Arrest	C0018790	disease	Cardiovascular Diseases	Disease or Syndrome
ROS1	6098	Hemangiosarcoma	C0018923	disease	Neoplasms	Neoplastic Process
ROS1	6098	Hepatitis C	C0019196	disease	Digestive System Diseases; Infections	Disease or Syndrome
ROS1	6098	Huntington Disease	C0020179	disease	Congenital, Hereditary, and Neonatal Diseases and Abnormalities; Nervous System Diseases; Mental Disorders	Disease or Syndrome
ROS1	6098	Hypercholesterolemia, Familial	C0020445	disease	Congenital, Hereditary, and Neonatal Diseases and Abnormalities; Nutritional and Metabolic Diseases	Disease or Syndrome
ROS1	6098	Hyperinsulinism	C0020459	disease	Nutritional and Metabolic Diseases	Disease or Syndrome
ROS1	6098	Inflammatory Bowel Diseases	C0021390	group	Digestive System Diseases	Disease or Syndrome
ROS1	6098	Kidney Diseases	C0022658	group	Female Urogenital Diseases and Pregnancy Complications; Male Urogenital Diseases	Disease or Syndrome
ROS1	6098	Kidney Failure, Acute	C0022660	disease	Female Urogenital Diseases and Pregnancy Complications; Male Urogenital Diseases	Disease or Syndrome
ROS1	6098	Leukemia, Myelomonocytic, Chronic	C0023480	disease	Neoplasms; Hemic and Lymphatic Diseases	Neoplastic Process
ROS1	6098	Liver diseases	C0023895	group	Digestive System Diseases	Disease or Syndrome
ROS1	6098	Alcoholic Liver Diseases	C0023896	group	Digestive System Diseases; Chemically-Induced Disorders	Disease or Syndrome
ROS1	6098	Liver neoplasms	C0023903	group	Digestive System Diseases; Neoplasms	Neoplastic Process
ROS1	6098	Chronic Obstructive Airway Disease	C0024117	disease	Respiratory Tract Diseases	Disease or Syndrome
ROS1	6098	Lymphoma	C0024299	group	Neoplasms; Immune System Diseases; Hemic and Lymphatic Diseases	Neoplastic Process
ROS1	6098	Marfan Syndrome	C0024796	disease	Congenital, Hereditary, and Neonatal Diseases and Abnormalities; Skin and Connective Tissue Diseases; Musculoskeletal Diseases; Cardiovascular Diseases	Disease or Syndrome
ROS1	6098	Mediastinal Neoplasms	C0025063	group	Neoplasms; Respiratory Tract Diseases	Neoplastic Process
ROS1	6098	Meningioma	C0025286	disease	Neoplasms; Nervous System Diseases	Neoplastic Process
ROS1	6098	Dental Fluorosis, Acquired	C0026618	disease	Stomatognathic Diseases	Disease or Syndrome
ROS1	6098	Muscular Dystrophy	C0026850	disease	Congenital, Hereditary, and Neonatal Diseases and Abnormalities; Musculoskeletal Diseases; Nervous System Diseases	Disease or Syndrome
ROS1	6098	Neuralgia	C0027796	phenotype	Pathological Conditions, Signs and Symptoms; Nervous System Diseases	Sign or Symptom
ROS1	6098	Massive Osteolyses	C0029438	disease	Musculoskeletal Diseases	Disease or Syndrome
ROS1	6098	Pain	C0030193	phenotype	Pathological Conditions, Signs and Symptoms	Sign or Symptom
ROS1	6098	Periodontitis	C0031099	disease	Stomatognathic Diseases	Disease or Syndrome
ROS1	6098	Pleural effusion disorder	C0032227	group	Respiratory Tract Diseases	Disease or Syndrome
ROS1	6098	Progeria	C0033300	disease	Congenital, Hereditary, and Neonatal Diseases and Abnormalities; Nutritional and Metabolic Diseases	Disease or Syndrome
ROS1	6098	Pulmonary Fibrosis	C0034069	disease	Respiratory Tract Diseases	Disease or Syndrome
ROS1	6098	Retinal Vein Occlusion	C0035328	disease	Eye Diseases; Cardiovascular Diseases	Disease or Syndrome
ROS1	6098	Retinoblastoma	C0035335	disease	Neoplasms; Eye Diseases	Neoplastic Process
ROS1	6098	Sarcoma 180	C0036211	disease	Neoplasms	Neoplastic Process; Experimental Model of Disease
ROS1	6098	Soft Tissue Neoplasms	C0037579	group	Neoplasms	Neoplastic Process
ROS1	6098	Cerebrovascular accident	C0038454	group	Nervous System Diseases; Cardiovascular Diseases	Disease or Syndrome
ROS1	6098	Subarachnoid Hemorrhage	C0038525	disease	Pathological Conditions, Signs and Symptoms; Nervous System Diseases; Cardiovascular Diseases	Disease or Syndrome
ROS1	6098	Thyroid Neoplasm	C0040136	disease	Neoplasms; Endocrine System Diseases	Neoplastic Process
ROS1	6098	Chagas Disease	C0041234	disease	Infections	Disease or Syndrome
ROS1	6098	Vascular Diseases	C0042373	group	Cardiovascular Diseases	Disease or Syndrome
ROS1	6098	Vitiligo	C0042900	disease	Skin and Connective Tissue Diseases	Disease or Syndrome
ROS1	6098	Central Nervous System Neoplasms	C0085136	group	Neoplasms; Nervous System Diseases	Neoplastic Process
ROS1	6098	Alagille Syndrome	C0085280	disease	Congenital, Hereditary, and Neonatal Diseases and Abnormalities; Digestive System Diseases; Cardiovascular Diseases	Congenital Abnormality
ROS1	6098	Ehrlichiosis	C0085399	disease	Infections	Disease or Syndrome
ROS1	6098	Polyendocrinopathies, Autoimmune	C0085409	group	Immune System Diseases; Endocrine System Diseases	Disease or Syndrome
ROS1	6098	Liver Failure	C0085605	disease	Digestive System Diseases	Disease or Syndrome
ROS1	6098	Small cell carcinoma of lung	C0149925	disease	Neoplasms; Respiratory Tract Diseases	Neoplastic Process
ROS1	6098	Hypocholesterolemia	C0151718	disease	Nutritional and Metabolic Diseases	Disease or Syndrome
ROS1	6098	Myocardial Ischemia	C0151744	disease	Cardiovascular Diseases	Disease or Syndrome
ROS1	6098	Malignant neoplasm of mouth	C0153381	group	Neoplasms; Stomatognathic Diseases	Neoplastic Process
ROS1	6098	Malignant neoplasm of brain	C0153633	disease	Neoplasms; Nervous System Diseases	Neoplastic Process
ROS1	6098	Secondary malignant neoplasm of bone	C0153690	disease	Pathological Conditions, Signs and Symptoms; Neoplasms; Musculoskeletal Diseases	Neoplastic Process
ROS1	6098	Adrenoleukodystrophy	C0162309	disease	Congenital, Hereditary, and Neonatal Diseases and Abnormalities; Nutritional and Metabolic Diseases; Nervous System Diseases; Endocrine System Diseases	Disease or Syndrome
ROS1	6098	Malnutrition	C0162429	disease	Nutritional and Metabolic Diseases	Disease or Syndrome
ROS1	6098	Saethre-Chotzen Syndrome	C0175699	disease	Congenital, Hereditary, and Neonatal Diseases and Abnormalities; Musculoskeletal Diseases	Disease or Syndrome
ROS1	6098	Glomerulosclerosis (disorder)	C0178664	disease	Female Urogenital Diseases and Pregnancy Complications; Male Urogenital Diseases; Cardiovascular Diseases	Disease or Syndrome
ROS1	6098	Carcinoma, Giant Cell	C0206703	disease	Neoplasms	Neoplastic Process
ROS1	6098	Epithelioid hemangioendothelioma	C0206732	disease	Neoplasms	Neoplastic Process
ROS1	6098	Lip and Oral Cavity Carcinoma	C0220641	disease	Neoplasms; Stomatognathic Diseases	Neoplastic Process
ROS1	6098	Hyperammonemia	C0220994	phenotype	Pathological Conditions, Signs and Symptoms	Disease or Syndrome
ROS1	6098	Vascular ring	C0221214	disease	Congenital, Hereditary, and Neonatal Diseases and Abnormalities; Cardiovascular Diseases	Congenital Abnormality
ROS1	6098	Fibrillation	C0232197	disease	Pathological Conditions, Signs and Symptoms; Cardiovascular Diseases	Disease or Syndrome
ROS1	6098	Inflammatory pain	C0234251	phenotype	Pathological Conditions, Signs and Symptoms	Sign or Symptom
ROS1	6098	Gallbladder Carcinoma	C0235782	disease	Digestive System Diseases; Neoplasms	Neoplastic Process
ROS1	6098	Caffeine related disorders	C0236734	group		Mental or Behavioral Dysfunction
ROS1	6098	Lymphangitis carcinomatosa	C0238258	disease	Neoplasms	Neoplastic Process
ROS1	6098	Anaplastic thyroid carcinoma	C0238461	disease	Neoplasms	Neoplastic Process
ROS1	6098	Papillary thyroid carcinoma	C0238463	disease	Neoplasms; Endocrine System Diseases	Neoplastic Process
ROS1	6098	Erectile dysfunction	C0242350	disease	Male Urogenital Diseases; Mental Disorders	Disease or Syndrome
ROS1	6098	Age related macular degeneration	C0242383	disease	Eye Diseases	Disease or Syndrome
ROS1	6098	Psoriasis vulgaris	C0263361	disease	Skin and Connective Tissue Diseases	Disease or Syndrome
ROS1	6098	Chronic heart failure	C0264716	disease	Cardiovascular Diseases	Disease or Syndrome
ROS1	6098	Donohue Syndrome	C0265344	disease	Congenital, Hereditary, and Neonatal Diseases and Abnormalities; Nutritional and Metabolic Diseases; Musculoskeletal Diseases; Endocrine System Diseases	Disease or Syndrome
ROS1	6098	Actinic cheilitis	C0267026	disease	Stomatognathic Diseases	Disease or Syndrome
[truncated: 330 more rows]
