# Supplementary material for: Molecular features similarities between SARS-CoV-2, SARS, MERS and key human genes could favour the viral infections and trigger collateral effects
Source: bioRxiv preprint, doi:10.1101/2020.06.23.167072, version 1 (2020-06-25)
Supplement: Supplementary files [file 167072_file07.zip › sup_files/Supplementary_file_2.pdf]

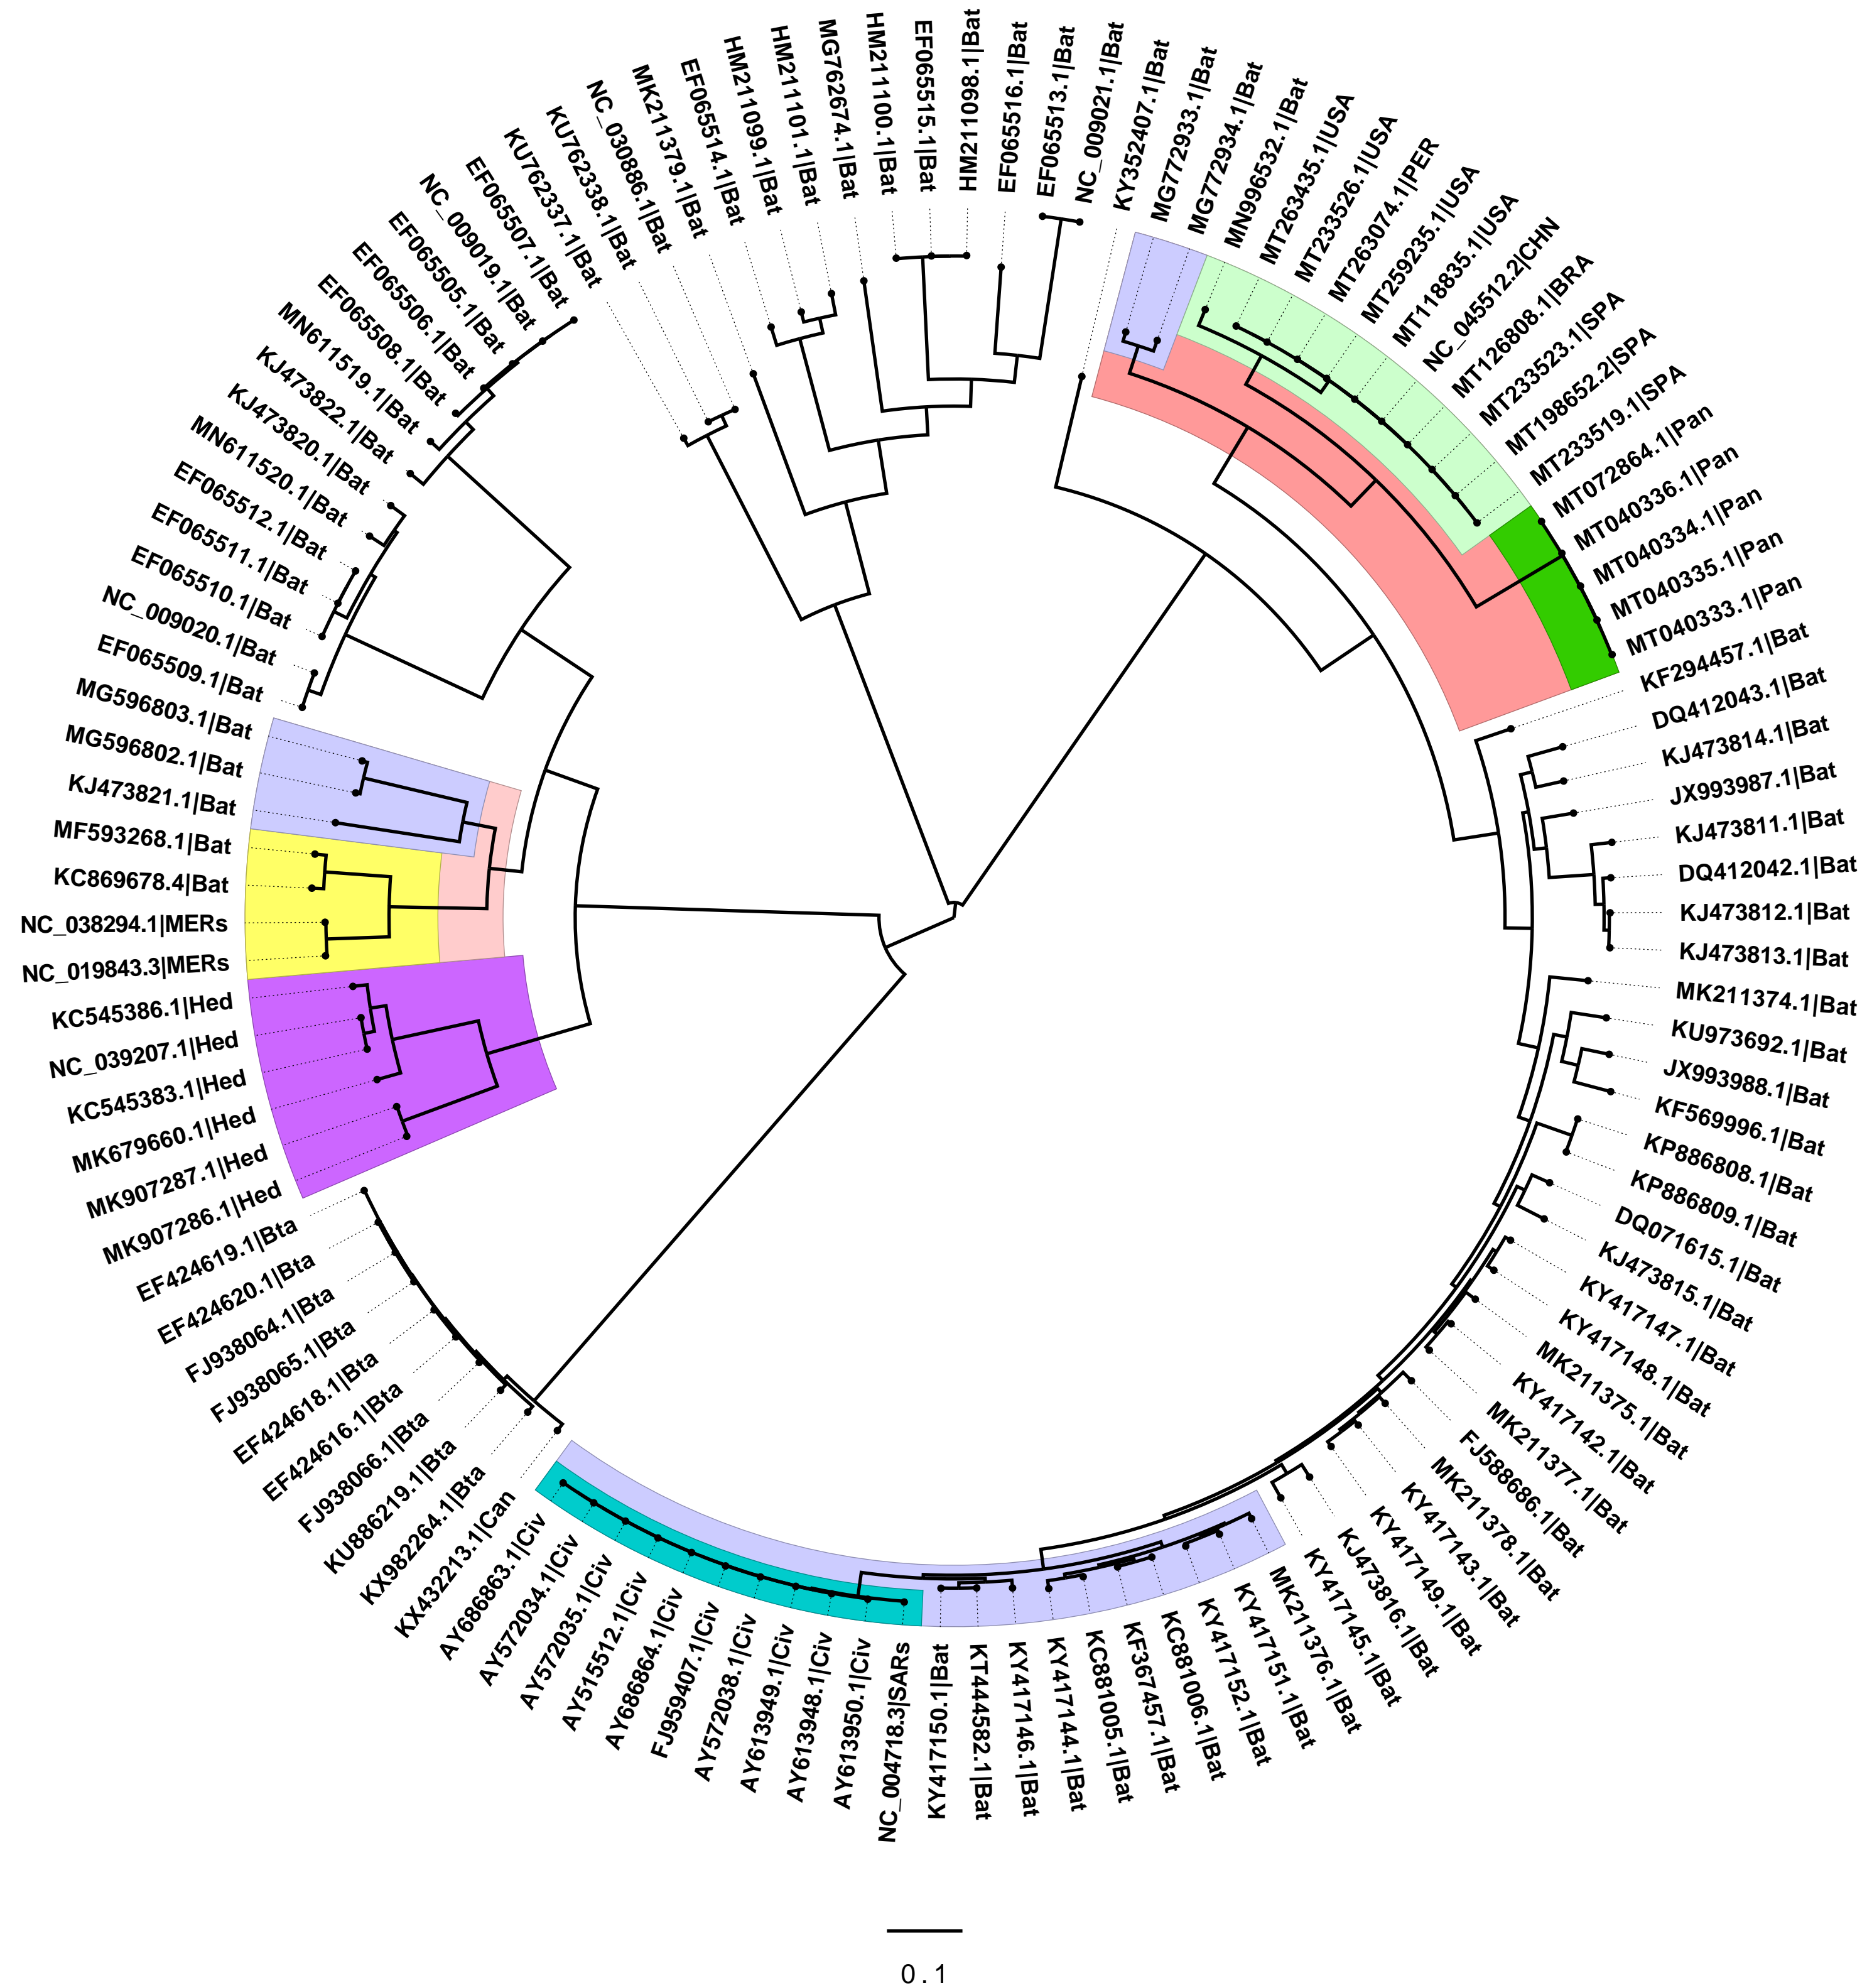

Supplementary file 2: Phylogenetic tree using 118 virus genomes including the references SARS-CoV-2, SARS, and MERS and related viruses belonging to non-human host as described in Supplementary file 1. The clusters were virus grouped with SARS-CoV-2, SARS, and MERS are highlighted. The accession id is followed by the host that the sample was isolated from or the country in the case of different isolations of SARS-CoV-2. Civ: civets, Bta: *Bos taurus*, Hed: hedgehogs, Pan: pangolins.
